# Supplementary material for: What Metagenomics Reveals of Microbial Populations in a Host-Parasite Relationship Between Alpine Goats and <em>Haemonchus contortus</em>
Source: Preprints.org preprint supplement (doi:10.20944/preprints202312.1796.v1), 2023-12-25
Supplement: Supplementary file 1 [file supplementary]

## Sheet: Sheet1
taxlevel	rankID	taxon	total	AF_E10_AB_7	AF_E1_NI_7	AF_E2_NI_7	AF_E3_NI_7	AF_E4_IO_7	AF_E5_IO_7	AF_E6_ZA_7	AF_E7_AB_7	AF_E8_AB_7	AF_F10_AB_7	AF_F1_NI_7	AF_F2_NI_7	AF_F3_IO_7	AF_F5_IO_7	AF_F6_ZA_7	AF_F7_ZA_7	AF_F8_ZA_7	AF_G10_ZA_21	AF_G1_AB_21	AF_G2_AB_21	AF_G3_AB_21	AF_G4_ZA_21	AF_G5_ZA_21	AF_G6_IO_21	AF_G7_AB_21	AF_G8_IO_21	AF_H10_NI_21	AF_H1_IO_21	AF_H2_ZA_21	AF_H3_NI_21	AF_H4_ZA_21	AF_H5_IO_21	AF_H6_IO_21	AF_H7_NI_21	AF_H8_NI_21	AF_H9_NI_21	ALN_E4_IO_7	ALN_E5_IO_7	ALN_E9_AB_7	ALN_F10_AB_7	ALN_F1_NI_7	ALN_F2_NI_7	ALN_F3_IO_7	ALN_F4_IO_7	ALN_F5_IO_7	ALN_F6_ZA_7
2	0.1.1	Abditibacteriota	3	0	0	0	0	0	0	0	0	0	0	0	0	0	0	0	0	0	0	0	0	0	0	0	0	0	0	0	0	0	1	0	0	0	0	0	0	0	0	0	0	0	0	0	0	0	0
3	0.1.1.1	Abditibacteria	3	0	0	0	0	0	0	0	0	0	0	0	0	0	0	0	0	0	0	0	0	0	0	0	0	0	0	0	0	0	1	0	0	0	0	0	0	0	0	0	0	0	0	0	0	0	0
4	0.1.1.1.1	Abditibacteriales	3	0	0	0	0	0	0	0	0	0	0	0	0	0	0	0	0	0	0	0	0	0	0	0	0	0	0	0	0	0	1	0	0	0	0	0	0	0	0	0	0	0	0	0	0	0	0
5	0.1.1.1.1.1	Abditibacteriaceae	3	0	0	0	0	0	0	0	0	0	0	0	0	0	0	0	0	0	0	0	0	0	0	0	0	0	0	0	0	0	1	0	0	0	0	0	0	0	0	0	0	0	0	0	0	0	0
6	0.1.1.1.1.1.1	Abditibacterium	3	0	0	0	0	0	0	0	0	0	0	0	0	0	0	0	0	0	0	0	0	0	0	0	0	0	0	0	0	0	1	0	0	0	0	0	0	0	0	0	0	0	0	0	0	0	0
2	0.1.2	Acidobacteriota	74373	0	0	2	2	15	38	6	12	0	2	0	12	3	10	30	24	85	0	119	19	6	16	13	57	38	20	42	90	69	130	0	208	75	36	125	44	165	238	1	348	8	1	286	86	17	268
3	0.1.2.1	AT-s3-28	63	0	0	0	0	0	0	0	0	0	0	0	0	0	0	0	0	0	0	0	0	0	0	0	0	0	0	0	0	0	0	0	0	0	0	0	0	0	0	0	0	0	0	0	0	0	0
4	0.1.2.1.1	AT-s3-28_or	63	0	0	0	0	0	0	0	0	0	0	0	0	0	0	0	0	0	0	0	0	0	0	0	0	0	0	0	0	0	0	0	0	0	0	0	0	0	0	0	0	0	0	0	0	0	0
5	0.1.2.1.1.1	AT-s3-28_fa	63	0	0	0	0	0	0	0	0	0	0	0	0	0	0	0	0	0	0	0	0	0	0	0	0	0	0	0	0	0	0	0	0	0	0	0	0	0	0	0	0	0	0	0	0	0	0
6	0.1.2.1.1.1.1	AT-s3-28_ge	63	0	0	0	0	0	0	0	0	0	0	0	0	0	0	0	0	0	0	0	0	0	0	0	0	0	0	0	0	0	0	0	0	0	0	0	0	0	0	0	0	0	0	0	0	0	0
3	0.1.2.2	Acidobacteriae	19790	0	0	0	0	6	14	0	5	0	2	0	4	0	3	10	13	26	0	35	10	1	1	8	18	15	9	16	39	19	35	0	47	27	13	30	18	32	20	0	68	1	1	45	21	2	51
4	0.1.2.2.1	AKIW659	761	0	0	0	0	0	0	0	0	0	0	0	0	0	0	1	0	0	0	0	0	0	0	1	0	0	0	0	0	0	1	0	1	0	1	7	1	1	9	0	1	0	0	0	3	0	2
5	0.1.2.2.1.1	AKIW659_fa	761	0	0	0	0	0	0	0	0	0	0	0	0	0	0	1	0	0	0	0	0	0	0	1	0	0	0	0	0	0	1	0	1	0	1	7	1	1	9	0	1	0	0	0	3	0	2
6	0.1.2.2.1.1.1	AKIW659_ge	761	0	0	0	0	0	0	0	0	0	0	0	0	0	0	1	0	0	0	0	0	0	0	1	0	0	0	0	0	0	1	0	1	0	1	7	1	1	9	0	1	0	0	0	3	0	2
4	0.1.2.2.2	Acidobacteriae_or	120	0	0	0	0	0	0	0	0	0	0	0	0	0	0	0	0	0	0	0	0	0	0	0	0	0	0	0	0	0	0	0	0	0	0	0	0	0	2	0	0	0	0	0	0	0	0
5	0.1.2.2.2.1	Acidobacteriae_fa	120	0	0	0	0	0	0	0	0	0	0	0	0	0	0	0	0	0	0	0	0	0	0	0	0	0	0	0	0	0	0	0	0	0	0	0	0	0	2	0	0	0	0	0	0	0	0
6	0.1.2.2.2.1.1	Acidobacteriae_fa_unclassified	6	0	0	0	0	0	0	0	0	0	0	0	0	0	0	0	0	0	0	0	0	0	0	0	0	0	0	0	0	0	0	0	0	0	0	0	0	0	0	0	0	0	0	0	0	0	0
6	0.1.2.2.2.1.2	Acidobacteriae_ge	3	0	0	0	0	0	0	0	0	0	0	0	0	0	0	0	0	0	0	0	0	0	0	0	0	0	0	0	0	0	0	0	0	0	0	0	0	0	0	0	0	0	0	0	0	0	0
6	0.1.2.2.2.1.3	Paludibaculum	111	0	0	0	0	0	0	0	0	0	0	0	0	0	0	0	0	0	0	0	0	0	0	0	0	0	0	0	0	0	0	0	0	0	0	0	0	0	2	0	0	0	0	0	0	0	0
4	0.1.2.2.3	Acidobacteriae_unclassified	8483	0	0	0	0	3	7	0	3	0	0	0	1	0	1	2	5	9	0	14	3	1	0	4	2	6	2	4	22	7	14	0	13	12	6	9	7	18	4	0	31	0	1	28	10	1	12
5	0.1.2.2.3.1	Acidobacteriae_unclassified	8483	0	0	0	0	3	7	0	3	0	0	0	1	0	1	2	5	9	0	14	3	1	0	4	2	6	2	4	22	7	14	0	13	12	6	9	7	18	4	0	31	0	1	28	10	1	12
6	0.1.2.2.3.1.1	Acidobacteriae_unclassified	8483	0	0	0	0	3	7	0	3	0	0	0	1	0	1	2	5	9	0	14	3	1	0	4	2	6	2	4	22	7	14	0	13	12	6	9	7	18	4	0	31	0	1	28	10	1	12
4	0.1.2.2.4	Acidobacteriales	403	0	0	0	0	0	0	0	0	0	0	0	0	0	0	1	0	0	0	0	0	0	0	0	0	0	0	0	0	0	0	0	0	0	0	0	0	0	0	0	3	0	0	1	0	0	0
5	0.1.2.2.4.1	Acidobacteriaceae_(Subgroup_1)	4	0	0	0	0	0	0	0	0	0	0	0	0	0	0	0	0	0	0	0	0	0	0	0	0	0	0	0	0	0	0	0	0	0	0	0	0	0	0	0	0	0	0	0	0	0	0
6	0.1.2.2.4.1.1	Acidobacteriaceae_(Subgroup_1)_unclassified	3	0	0	0	0	0	0	0	0	0	0	0	0	0	0	0	0	0	0	0	0	0	0	0	0	0	0	0	0	0	0	0	0	0	0	0	0	0	0	0	0	0	0	0	0	0	0
6	0.1.2.2.4.1.2	Terriglobus	1	0	0	0	0	0	0	0	0	0	0	0	0	0	0	0	0	0	0	0	0	0	0	0	0	0	0	0	0	0	0	0	0	0	0	0	0	0	0	0	0	0	0	0	0	0	0
5	0.1.2.2.4.2	Acidobacteriales_fa	26	0	0	0	0	0	0	0	0	0	0	0	0	0	0	1	0	0	0	0	0	0	0	0	0	0	0	0	0	0	0	0	0	0	0	0	0	0	0	0	0	0	0	0	0	0	0
6	0.1.2.2.4.2.1	Acidobacteriales_ge	26	0	0	0	0	0	0	0	0	0	0	0	0	0	0	1	0	0	0	0	0	0	0	0	0	0	0	0	0	0	0	0	0	0	0	0	0	0	0	0	0	0	0	0	0	0	0
5	0.1.2.2.4.3	Acidobacteriales_unclassified	141	0	0	0	0	0	0	0	0	0	0	0	0	0	0	0	0	0	0	0	0	0	0	0	0	0	0	0	0	0	0	0	0	0	0	0	0	0	0	0	3	0	0	1	0	0	0
6	0.1.2.2.4.3.1	Acidobacteriales_unclassified	141	0	0	0	0	0	0	0	0	0	0	0	0	0	0	0	0	0	0	0	0	0	0	0	0	0	0	0	0	0	0	0	0	0	0	0	0	0	0	0	3	0	0	1	0	0	0
5	0.1.2.2.4.4	Koribacteraceae	75	0	0	0	0	0	0	0	0	0	0	0	0	0	0	0	0	0	0	0	0	0	0	0	0	0	0	0	0	0	0	0	0	0	0	0	0	0	0	0	0	0	0	0	0	0	0
6	0.1.2.2.4.4.1	Candidatus_Koribacter	75	0	0	0	0	0	0	0	0	0	0	0	0	0	0	0	0	0	0	0	0	0	0	0	0	0	0	0	0	0	0	0	0	0	0	0	0	0	0	0	0	0	0	0	0	0	0
5	0.1.2.2.4.5	uncultured	157	0	0	0	0	0	0	0	0	0	0	0	0	0	0	0	0	0	0	0	0	0	0	0	0	0	0	0	0	0	0	0	0	0	0	0	0	0	0	0	0	0	0	0	0	0	0
6	0.1.2.2.4.5.1	uncultured_ge	157	0	0	0	0	0	0	0	0	0	0	0	0	0	0	0	0	0	0	0	0	0	0	0	0	0	0	0	0	0	0	0	0	0	0	0	0	0	0	0	0	0	0	0	0	0	0
4	0.1.2.2.5	Bryobacterales	3634	0	0	0	0	1	2	0	0	0	0	0	0	0	0	3	2	4	0	7	0	0	0	2	2	2	0	5	10	3	8	0	6	5	3	2	1	1	1	0	12	1	0	2	0	1	8
5	0.1.2.2.5.1	Bryobacteraceae	3634	0	0	0	0	1	2	0	0	0	0	0	0	0	0	3	2	4	0	7	0	0	0	2	2	2	0	5	10	3	8	0	6	5	3	2	1	1	1	0	12	1	0	2	0	1	8
6	0.1.2.2.5.1.1	Bryobacter	3634	0	0	0	0	1	2	0	0	0	0	0	0	0	0	3	2	4	0	7	0	0	0	2	2	2	0	5	10	3	8	0	6	5	3	2	1	1	1	0	12	1	0	2	0	1	8
4	0.1.2.2.6	Elev-16S-1166	62	0	0	0	0	0	0	0	0	0	0	0	0	0	0	0	0	0	0	0	0	0	1	0	0	0	0	0	0	0	0	0	1	0	0	0	0	1	0	0	0	0	0	1	0	0	0
5	0.1.2.2.6.1	Elev-16S-1166_fa	62	0	0	0	0	0	0	0	0	0	0	0	0	0	0	0	0	0	0	0	0	0	1	0	0	0	0	0	0	0	0	0	1	0	0	0	0	1	0	0	0	0	0	1	0	0	0
6	0.1.2.2.6.1.1	Elev-16S-1166_ge	62	0	0	0	0	0	0	0	0	0	0	0	0	0	0	0	0	0	0	0	0	0	1	0	0	0	0	0	0	0	0	0	1	0	0	0	0	1	0	0	0	0	0	1	0	0	0
4	0.1.2.2.7	GOUTB8	43	0	0	0	0	0	0	0	0	0	0	0	0	0	0	0	0	0	0	0	0	0	0	0	0	0	0	0	0	0	0	0	0	0	0	0	0	0	0	0	0	0	0	0	0	0	0
5	0.1.2.2.7.1	GOUTB8_fa	43	0	0	0	0	0	0	0	0	0	0	0	0	0	0	0	0	0	0	0	0	0	0	0	0	0	0	0	0	0	0	0	0	0	0	0	0	0	0	0	0	0	0	0	0	0	0
6	0.1.2.2.7.1.1	GOUTB8_ge	43	0	0	0	0	0	0	0	0	0	0	0	0	0	0	0	0	0	0	0	0	0	0	0	0	0	0	0	0	0	0	0	0	0	0	0	0	0	0	0	0	0	0	0	0	0	0
4	0.1.2.2.8	PAUC26f	752	0	0	0	0	0	0	0	1	0	0	0	1	0	1	1	4	4	0	3	0	0	0	1	0	0	0	0	0	0	0	0	0	1	0	1	0	1	0	0	0	0	0	0	1	0	3
5	0.1.2.2.8.1	PAUC26f_fa	752	0	0	0	0	0	0	0	1	0	0	0	1	0	1	1	4	4	0	3	0	0	0	1	0	0	0	0	0	0	0	0	0	1	0	1	0	1	0	0	0	0	0	0	1	0	3
6	0.1.2.2.8.1.1	PAUC26f_ge	752	0	0	0	0	0	0	0	1	0	0	0	1	0	1	1	4	4	0	3	0	0	0	1	0	0	0	0	0	0	0	0	0	1	0	1	0	1	0	0	0	0	0	0	1	0	3
4	0.1.2.2.9	Solibacterales	3116	0	0	0	0	0	2	0	0	0	2	0	0	0	1	2	2	7	0	4	4	0	0	0	8	7	6	6	7	5	8	0	18	8	0	2	2	6	4	0	7	0	0	3	6	0	14
5	0.1.2.2.9.1	Solibacteraceae	3116	0	0	0	0	0	2	0	0	0	2	0	0	0	1	2	2	7	0	4	4	0	0	0	8	7	6	6	7	5	8	0	18	8	0	2	2	6	4	0	7	0	0	3	6	0	14
6	0.1.2.2.9.1.1	Candidatus_Solibacter	3116	0	0	0	0	0	2	0	0	0	2	0	0	0	1	2	2	7	0	4	4	0	0	0	8	7	6	6	7	5	8	0	18	8	0	2	2	6	4	0	7	0	0	3	6	0	14
4	0.1.2.2.10	Subgroup_12	1893	0	0	0	0	2	3	0	1	0	0	0	2	0	0	0	0	2	0	1	3	0	0	0	6	0	0	1	0	4	3	0	6	1	3	3	7	4	0	0	6	0	0	6	0	0	7
5	0.1.2.2.10.1	Subgroup_12_fa	1893	0	0	0	0	2	3	0	1	0	0	0	2	0	0	0	0	2	0	1	3	0	0	0	6	0	0	1	0	4	3	0	6	1	3	3	7	4	0	0	6	0	0	6	0	0	7
6	0.1.2.2.10.1.1	Subgroup_12_ge	1893	0	0	0	0	2	3	0	1	0	0	0	2	0	0	0	0	2	0	1	3	0	0	0	6	0	0	1	0	4	3	0	6	1	3	3	7	4	0	0	6	0	0	6	0	0	7
4	0.1.2.2.11	Subgroup_13	187	0	0	0	0	0	0	0	0	0	0	0	0	0	0	0	0	0	0	0	0	0	0	0	0	0	1	0	0	0	0	0	0	0	0	0	0	0	0	0	3	0	0	1	0	0	0
5	0.1.2.2.11.1	Subgroup_13_fa	187	0	0	0	0	0	0	0	0	0	0	0	0	0	0	0	0	0	0	0	0	0	0	0	0	0	1	0	0	0	0	0	0	0	0	0	0	0	0	0	3	0	0	1	0	0	0
6	0.1.2.2.11.1.1	Subgroup_13_ge	187	0	0	0	0	0	0	0	0	0	0	0	0	0	0	0	0	0	0	0	0	0	0	0	0	0	1	0	0	0	0	0	0	0	0	0	0	0	0	0	3	0	0	1	0	0	0
4	0.1.2.2.12	Subgroup_15	40	0	0	0	0	0	0	0	0	0	0	0	0	0	0	0	0	0	0	0	0	0	0	0	0	0	0	0	0	0	0	0	0	0	0	0	0	0	0	0	3	0	0	0	0	0	0
5	0.1.2.2.12.1	Subgroup_15_fa	40	0	0	0	0	0	0	0	0	0	0	0	0	0	0	0	0	0	0	0	0	0	0	0	0	0	0	0	0	0	0	0	0	0	0	0	0	0	0	0	3	0	0	0	0	0	0
6	0.1.2.2.12.1.1	Subgroup_15_ge	40	0	0	0	0	0	0	0	0	0	0	0	0	0	0	0	0	0	0	0	0	0	0	0	0	0	0	0	0	0	0	0	0	0	0	0	0	0	0	0	3	0	0	0	0	0	0
4	0.1.2.2.13	Subgroup_2	151	0	0	0	0	0	0	0	0	0	0	0	0	0	0	0	0	0	0	6	0	0	0	0	0	0	0	0	0	0	0	0	0	0	0	3	0	0	0	0	0	0	0	0	1	0	4
5	0.1.2.2.13.1	Subgroup_2_fa	151	0	0	0	0	0	0	0	0	0	0	0	0	0	0	0	0	0	0	6	0	0	0	0	0	0	0	0	0	0	0	0	0	0	0	3	0	0	0	0	0	0	0	0	1	0	4
6	0.1.2.2.13.1.1	Subgroup_2_ge	151	0	0	0	0	0	0	0	0	0	0	0	0	0	0	0	0	0	0	6	0	0	0	0	0	0	0	0	0	0	0	0	0	0	0	3	0	0	0	0	0	0	0	0	1	0	4
4	0.1.2.2.14	TSBb06	145	0	0	0	0	0	0	0	0	0	0	0	0	0	0	0	0	0	0	0	0	0	0	0	0	0	0	0	0	0	1	0	2	0	0	3	0	0	0	0	2	0	0	3	0	0	1
5	0.1.2.2.14.1	TSBb06_fa	145	0	0	0	0	0	0	0	0	0	0	0	0	0	0	0	0	0	0	0	0	0	0	0	0	0	0	0	0	0	1	0	2	0	0	3	0	0	0	0	2	0	0	3	0	0	1
6	0.1.2.2.14.1.1	TSBb06_ge	145	0	0	0	0	0	0	0	0	0	0	0	0	0	0	0	0	0	0	0	0	0	0	0	0	0	0	0	0	0	1	0	2	0	0	3	0	0	0	0	2	0	0	3	0	0	1
3	0.1.2.3	Acidobacteriota_cl	1	0	0	0	0	0	0	0	0	0	0	0	0	0	0	0	0	0	0	0	0	0	0	0	0	0	0	0	0	0	0	0	0	0	0	0	0	0	0	0	0	0	0	0	0	0	0
4	0.1.2.3.1	Acidobacteriota_or	1	0	0	0	0	0	0	0	0	0	0	0	0	0	0	0	0	0	0	0	0	0	0	0	0	0	0	0	0	0	0	0	0	0	0	0	0	0	0	0	0	0	0	0	0	0	0
5	0.1.2.3.1.1	Acidobacteriota_fa	1	0	0	0	0	0	0	0	0	0	0	0	0	0	0	0	0	0	0	0	0	0	0	0	0	0	0	0	0	0	0	0	0	0	0	0	0	0	0	0	0	0	0	0	0	0	0
6	0.1.2.3.1.1.1	Acidobacteriota_ge	1	0	0	0	0	0	0	0	0	0	0	0	0	0	0	0	0	0	0	0	0	0	0	0	0	0	0	0	0	0	0	0	0	0	0	0	0	0	0	0	0	0	0	0	0	0	0
3	0.1.2.4	Acidobacteriota_unclassified	9439	0	0	0	0	1	7	1	0	0	0	0	1	0	1	1	2	14	0	16	2	1	3	0	6	6	7	3	12	11	5	0	35	7	1	8	7	31	48	0	40	0	0	38	17	3	31
4	0.1.2.4.1	Acidobacteriota_unclassified	9439	0	0	0	0	1	7	1	0	0	0	0	1	0	1	1	2	14	0	16	2	1	3	0	6	6	7	3	12	11	5	0	35	7	1	8	7	31	48	0	40	0	0	38	17	3	31
5	0.1.2.4.1.1	Acidobacteriota_unclassified	9439	0	0	0	0	1	7	1	0	0	0	0	1	0	1	1	2	14	0	16	2	1	3	0	6	6	7	3	12	11	5	0	35	7	1	8	7	31	48	0	40	0	0	38	17	3	31
6	0.1.2.4.1.1.1	Acidobacteriota_unclassified	9439	0	0	0	0	1	7	1	0	0	0	0	1	0	1	1	2	14	0	16	2	1	3	0	6	6	7	3	12	11	5	0	35	7	1	8	7	31	48	0	40	0	0	38	17	3	31
3	0.1.2.5	Blastocatellia	14004	0	0	1	2	3	6	2	0	0	0	0	2	2	2	4	3	15	0	33	3	1	7	2	13	7	1	5	13	11	27	0	31	10	8	14	6	10	59	0	63	0	0	24	8	4	65
4	0.1.2.5.1	2022-11-24	9755	0	0	1	0	3	4	2	0	0	0	0	1	2	2	4	1	10	0	23	2	1	3	2	8	6	1	5	10	4	25	0	25	9	6	8	3	9	52	0	27	0	0	13	6	2	30
5	0.1.2.5.1.1	11-24_fa	9755	0	0	1	0	3	4	2	0	0	0	0	1	2	2	4	1	10	0	23	2	1	3	2	8	6	1	5	10	4	25	0	25	9	6	8	3	9	52	0	27	0	0	13	6	2	30
6	0.1.2.5.1.1.1	11-24_ge	9755	0	0	1	0	3	4	2	0	0	0	0	1	2	2	4	1	10	0	23	2	1	3	2	8	6	1	5	10	4	25	0	25	9	6	8	3	9	52	0	27	0	0	13	6	2	30
4	0.1.2.5.2	Blastocatellales	77	0	0	0	0	0	0	0	0	0	0	0	0	0	0	0	0	1	0	0	0	0	0	0	0	0	0	0	0	0	0	0	0	0	0	0	0	0	0	0	0	0	0	0	0	0	0
5	0.1.2.5.2.1	Blastocatellaceae	77	0	0	0	0	0	0	0	0	0	0	0	0	0	0	0	0	1	0	0	0	0	0	0	0	0	0	0	0	0	0	0	0	0	0	0	0	0	0	0	0	0	0	0	0	0	0
6	0.1.2.5.2.1.1	Aridibacter	18	0	0	0	0	0	0	0	0	0	0	0	0	0	0	0	0	1	0	0	0	0	0	0	0	0	0	0	0	0	0	0	0	0	0	0	0	0	0	0	0	0	0	0	0	0	0
6	0.1.2.5.2.1.2	Blastocatellaceae_ge	37	0	0	0	0	0	0	0	0	0	0	0	0	0	0	0	0	0	0	0	0	0	0	0	0	0	0	0	0	0	0	0	0	0	0	0	0	0	0	0	0	0	0	0	0	0	0
6	0.1.2.5.2.1.3	Blastocatellaceae_unclassified	17	0	0	0	0	0	0	0	0	0	0	0	0	0	0	0	0	0	0	0	0	0	0	0	0	0	0	0	0	0	0	0	0	0	0	0	0	0	0	0	0	0	0	0	0	0	0
6	0.1.2.5.2.1.4	JGI_0001001-H03	1	0	0	0	0	0	0	0	0	0	0	0	0	0	0	0	0	0	0	0	0	0	0	0	0	0	0	0	0	0	0	0	0	0	0	0	0	0	0	0	0	0	0	0	0	0	0
6	0.1.2.5.2.1.5	OLB17	4	0	0	0	0	0	0	0	0	0	0	0	0	0	0	0	0	0	0	0	0	0	0	0	0	0	0	0	0	0	0	0	0	0	0	0	0	0	0	0	0	0	0	0	0	0	0
4	0.1.2.5.3	Blastocatellia_unclassified	229	0	0	0	0	0	0	0	0	0	0	0	0	0	0	0	0	1	0	0	0	0	0	0	0	0	0	0	0	1	0	0	0	0	0	0	0	0	4	0	5	0	0	1	0	0	3
5	0.1.2.5.3.1	Blastocatellia_unclassified	229	0	0	0	0	0	0	0	0	0	0	0	0	0	0	0	0	1	0	0	0	0	0	0	0	0	0	0	0	1	0	0	0	0	0	0	0	0	4	0	5	0	0	1	0	0	3
6	0.1.2.5.3.1.1	Blastocatellia_unclassified	229	0	0	0	0	0	0	0	0	0	0	0	0	0	0	0	0	1	0	0	0	0	0	0	0	0	0	0	0	1	0	0	0	0	0	0	0	0	4	0	5	0	0	1	0	0	3
4	0.1.2.5.4	DS-100	80	0	0	0	0	0	0	0	0	0	0	0	0	0	0	0	0	0	0	0	0	0	0	0	0	0	0	0	0	0	0	0	0	0	0	0	0	0	0	0	0	0	0	0	0	0	0
5	0.1.2.5.4.1	DS-100_fa	80	0	0	0	0	0	0	0	0	0	0	0	0	0	0	0	0	0	0	0	0	0	0	0	0	0	0	0	0	0	0	0	0	0	0	0	0	0	0	0	0	0	0	0	0	0	0
6	0.1.2.5.4.1.1	DS-100_ge	80	0	0	0	0	0	0	0	0	0	0	0	0	0	0	0	0	0	0	0	0	0	0	0	0	0	0	0	0	0	0	0	0	0	0	0	0	0	0	0	0	0	0	0	0	0	0
4	0.1.2.5.5	Pyrinomonadales	3863	0	0	0	2	0	2	0	0	0	0	0	1	0	0	0	2	3	0	10	1	0	4	0	5	1	0	0	3	6	2	0	6	1	2	6	3	1	3	0	31	0	0	10	2	2	32
5	0.1.2.5.5.1	Pyrinomonadaceae	3863	0	0	0	2	0	2	0	0	0	0	0	1	0	0	0	2	3	0	10	1	0	4	0	5	1	0	0	3	6	2	0	6	1	2	6	3	1	3	0	31	0	0	10	2	2	32
6	0.1.2.5.5.1.1	Pyrinomonadaceae_unclassified	117	0	0	0	0	0	0	0	0	0	0	0	0	0	0	0	0	0	0	0	0	0	0	0	0	0	0	0	0	0	0	0	1	0	0	0	0	0	0	0	0	0	0	2	0	1	4
6	0.1.2.5.5.1.2	Pyrinomonas	56	0	0	0	0	0	1	0	0	0	0	0	0	0	0	0	0	0	0	0	0	0	0	0	0	0	0	0	0	0	0	0	1	0	0	0	0	1	0	0	0	0	0	1	0	0	3
6	0.1.2.5.5.1.3	RB41	3690	0	0	0	2	0	1	0	0	0	0	0	1	0	0	0	2	3	0	10	1	0	4	0	5	1	0	0	3	6	2	0	4	1	2	6	3	0	3	0	31	0	0	7	2	1	25
3	0.1.2.6	Holophagae	94	0	0	0	0	0	0	0	0	0	0	0	0	1	0	0	0	0	0	1	0	0	0	0	0	0	0	0	0	0	1	0	3	0	0	0	0	0	0	0	2	0	0	0	0	0	0
4	0.1.2.6.1	Holophagae_unclassified	1	0	0	0	0	0	0	0	0	0	0	0	0	0	0	0	0	0	0	0	0	0	0	0	0	0	0	0	0	0	0	0	0	0	0	0	0	0	0	0	0	0	0	0	0	0	0
5	0.1.2.6.1.1	Holophagae_unclassified	1	0	0	0	0	0	0	0	0	0	0	0	0	0	0	0	0	0	0	0	0	0	0	0	0	0	0	0	0	0	0	0	0	0	0	0	0	0	0	0	0	0	0	0	0	0	0
6	0.1.2.6.1.1.1	Holophagae_unclassified	1	0	0	0	0	0	0	0	0	0	0	0	0	0	0	0	0	0	0	0	0	0	0	0	0	0	0	0	0	0	0	0	0	0	0	0	0	0	0	0	0	0	0	0	0	0	0
4	0.1.2.6.2	Holophagales	1	0	0	0	0	0	0	0	0	0	0	0	0	0	0	0	0	0	0	0	0	0	0	0	0	0	0	0	0	0	0	0	0	0	0	0	0	0	0	0	0	0	0	0	0	0	0
5	0.1.2.6.2.1	Holophagaceae	1	0	0	0	0	0	0	0	0	0	0	0	0	0	0	0	0	0	0	0	0	0	0	0	0	0	0	0	0	0	0	0	0	0	0	0	0	0	0	0	0	0	0	0	0	0	0
6	0.1.2.6.2.1.1	Holophaga	1	0	0	0	0	0	0	0	0	0	0	0	0	0	0	0	0	0	0	0	0	0	0	0	0	0	0	0	0	0	0	0	0	0	0	0	0	0	0	0	0	0	0	0	0	0	0
4	0.1.2.6.3	Subgroup_7	92	0	0	0	0	0	0	0	0	0	0	0	0	1	0	0	0	0	0	1	0	0	0	0	0	0	0	0	0	0	1	0	3	0	0	0	0	0	0	0	2	0	0	0	0	0	0
5	0.1.2.6.3.1	Subgroup_7_fa	92	0	0	0	0	0	0	0	0	0	0	0	0	1	0	0	0	0	0	1	0	0	0	0	0	0	0	0	0	0	1	0	3	0	0	0	0	0	0	0	2	0	0	0	0	0	0
6	0.1.2.6.3.1.1	Subgroup_7_ge	92	0	0	0	0	0	0	0	0	0	0	0	0	1	0	0	0	0	0	1	0	0	0	0	0	0	0	0	0	0	1	0	3	0	0	0	0	0	0	0	2	0	0	0	0	0	0
3	0.1.2.7	Subgroup_11	1773	0	0	0	0	0	0	0	0	0	0	0	0	0	0	0	0	4	0	0	0	0	0	1	0	2	0	1	3	2	3	0	6	2	0	8	0	4	5	0	4	0	0	13	0	0	4
4	0.1.2.7.1	Subgroup_11_or	1773	0	0	0	0	0	0	0	0	0	0	0	0	0	0	0	0	4	0	0	0	0	0	1	0	2	0	1	3	2	3	0	6	2	0	8	0	4	5	0	4	0	0	13	0	0	4
5	0.1.2.7.1.1	Subgroup_11_fa	1773	0	0	0	0	0	0	0	0	0	0	0	0	0	0	0	0	4	0	0	0	0	0	1	0	2	0	1	3	2	3	0	6	2	0	8	0	4	5	0	4	0	0	13	0	0	4
6	0.1.2.7.1.1.1	Subgroup_11_ge	1773	0	0	0	0	0	0	0	0	0	0	0	0	0	0	0	0	4	0	0	0	0	0	1	0	2	0	1	3	2	3	0	6	2	0	8	0	4	5	0	4	0	0	13	0	0	4
3	0.1.2.8	Subgroup_18	160	0	0	0	0	0	0	0	0	0	0	0	0	0	0	0	0	0	0	0	0	0	0	0	0	0	0	0	0	0	0	0	0	0	0	1	0	0	0	0	1	0	0	2	0	0	2
4	0.1.2.8.1	Subgroup_18_or	160	0	0	0	0	0	0	0	0	0	0	0	0	0	0	0	0	0	0	0	0	0	0	0	0	0	0	0	0	0	0	0	0	0	0	1	0	0	0	0	1	0	0	2	0	0	2
5	0.1.2.8.1.1	Subgroup_18_fa	160	0	0	0	0	0	0	0	0	0	0	0	0	0	0	0	0	0	0	0	0	0	0	0	0	0	0	0	0	0	0	0	0	0	0	1	0	0	0	0	1	0	0	2	0	0	2
6	0.1.2.8.1.1.1	Subgroup_18_ge	160	0	0	0	0	0	0	0	0	0	0	0	0	0	0	0	0	0	0	0	0	0	0	0	0	0	0	0	0	0	0	0	0	0	0	1	0	0	0	0	1	0	0	2	0	0	2
3	0.1.2.9	Subgroup_19	8	0	0	0	0	0	0	0	0	0	0	0	0	0	0	0	0	0	0	0	0	0	0	0	0	0	0	0	0	0	0	0	0	0	0	0	0	0	0	0	0	0	0	0	0	0	0
4	0.1.2.9.1	Subgroup_19_or	8	0	0	0	0	0	0	0	0	0	0	0	0	0	0	0	0	0	0	0	0	0	0	0	0	0	0	0	0	0	0	0	0	0	0	0	0	0	0	0	0	0	0	0	0	0	0
5	0.1.2.9.1.1	Subgroup_19_fa	8	0	0	0	0	0	0	0	0	0	0	0	0	0	0	0	0	0	0	0	0	0	0	0	0	0	0	0	0	0	0	0	0	0	0	0	0	0	0	0	0	0	0	0	0	0	0
6	0.1.2.9.1.1.1	Subgroup_19_ge	8	0	0	0	0	0	0	0	0	0	0	0	0	0	0	0	0	0	0	0	0	0	0	0	0	0	0	0	0	0	0	0	0	0	0	0	0	0	0	0	0	0	0	0	0	0	0
3	0.1.2.10	Subgroup_20	12	0	0	0	0	0	0	0	0	0	0	0	0	0	0	0	0	0	0	0	0	0	0	0	0	0	0	0	0	0	0	0	0	0	0	0	0	0	0	0	0	0	0	2	0	0	0
4	0.1.2.10.1	Subgroup_20_or	12	0	0	0	0	0	0	0	0	0	0	0	0	0	0	0	0	0	0	0	0	0	0	0	0	0	0	0	0	0	0	0	0	0	0	0	0	0	0	0	0	0	0	2	0	0	0
5	0.1.2.10.1.1	Subgroup_20_fa	12	0	0	0	0	0	0	0	0	0	0	0	0	0	0	0	0	0	0	0	0	0	0	0	0	0	0	0	0	0	0	0	0	0	0	0	0	0	0	0	0	0	0	2	0	0	0
6	0.1.2.10.1.1.1	Subgroup_20_ge	12	0	0	0	0	0	0	0	0	0	0	0	0	0	0	0	0	0	0	0	0	0	0	0	0	0	0	0	0	0	0	0	0	0	0	0	0	0	0	0	0	0	0	2	0	0	0
3	0.1.2.11	Subgroup_22	939	0	0	0	0	0	0	0	0	0	0	0	0	0	0	2	0	3	0	4	1	0	0	0	0	0	0	0	0	1	3	0	1	0	0	4	0	1	5	0	10	0	0	15	3	0	3
4	0.1.2.11.1	Subgroup_22_or	939	0	0	0	0	0	0	0	0	0	0	0	0	0	0	2	0	3	0	4	1	0	0	0	0	0	0	0	0	1	3	0	1	0	0	4	0	1	5	0	10	0	0	15	3	0	3
5	0.1.2.11.1.1	Subgroup_22_fa	939	0	0	0	0	0	0	0	0	0	0	0	0	0	0	2	0	3	0	4	1	0	0	0	0	0	0	0	0	1	3	0	1	0	0	4	0	1	5	0	10	0	0	15	3	0	3
6	0.1.2.11.1.1.1	Subgroup_22_ge	939	0	0	0	0	0	0	0	0	0	0	0	0	0	0	2	0	3	0	4	1	0	0	0	0	0	0	0	0	1	3	0	1	0	0	4	0	1	5	0	10	0	0	15	3	0	3
3	0.1.2.12	Subgroup_25	153	0	0	0	0	1	0	0	0	0	0	0	0	0	0	0	0	0	0	0	0	0	0	0	0	0	0	0	0	0	2	0	0	0	0	0	0	0	0	0	0	0	0	0	0	0	0
4	0.1.2.12.1	Subgroup_25_or	153	0	0	0	0	1	0	0	0	0	0	0	0	0	0	0	0	0	0	0	0	0	0	0	0	0	0	0	0	0	2	0	0	0	0	0	0	0	0	0	0	0	0	0	0	0	0
5	0.1.2.12.1.1	Subgroup_25_fa	153	0	0	0	0	1	0	0	0	0	0	0	0	0	0	0	0	0	0	0	0	0	0	0	0	0	0	0	0	0	2	0	0	0	0	0	0	0	0	0	0	0	0	0	0	0	0
6	0.1.2.12.1.1.1	Subgroup_25_ge	153	0	0	0	0	1	0	0	0	0	0	0	0	0	0	0	0	0	0	0	0	0	0	0	0	0	0	0	0	0	2	0	0	0	0	0	0	0	0	0	0	0	0	0	0	0	0
3	0.1.2.13	Subgroup_5	529	0	0	0	0	1	0	0	0	0	0	0	0	0	0	0	0	1	0	0	0	0	0	0	0	0	0	0	1	0	1	0	2	1	0	3	0	5	3	0	4	0	0	5	1	3	2
4	0.1.2.13.1	Subgroup_5_or	529	0	0	0	0	1	0	0	0	0	0	0	0	0	0	0	0	1	0	0	0	0	0	0	0	0	0	0	1	0	1	0	2	1	0	3	0	5	3	0	4	0	0	5	1	3	2
5	0.1.2.13.1.1	Subgroup_5_fa	529	0	0	0	0	1	0	0	0	0	0	0	0	0	0	0	0	1	0	0	0	0	0	0	0	0	0	0	1	0	1	0	2	1	0	3	0	5	3	0	4	0	0	5	1	3	2
6	0.1.2.13.1.1.1	Subgroup_5_ge	529	0	0	0	0	1	0	0	0	0	0	0	0	0	0	0	0	1	0	0	0	0	0	0	0	0	0	0	1	0	1	0	2	1	0	3	0	5	3	0	4	0	0	5	1	3	2
3	0.1.2.14	Thermoanaerobaculia	570	0	0	0	0	0	0	0	0	0	0	0	1	0	0	0	0	0	0	0	0	0	0	0	2	0	0	0	0	1	2	0	0	1	0	1	0	0	7	0	0	0	0	8	0	0	1
4	0.1.2.14.1	Thermoanaerobaculales	570	0	0	0	0	0	0	0	0	0	0	0	1	0	0	0	0	0	0	0	0	0	0	0	2	0	0	0	0	1	2	0	0	1	0	1	0	0	7	0	0	0	0	8	0	0	1
5	0.1.2.14.1.1	Thermoanaerobaculaceae	570	0	0	0	0	0	0	0	0	0	0	0	1	0	0	0	0	0	0	0	0	0	0	0	2	0	0	0	0	1	2	0	0	1	0	1	0	0	7	0	0	0	0	8	0	0	1
6	0.1.2.14.1.1.1	B276-D12	13	0	0	0	0	0	0	0	0	0	0	0	0	0	0	0	0	0	0	0	0	0	0	0	0	0	0	0	0	0	0	0	0	0	0	0	0	0	0	0	0	0	0	0	0	0	0
6	0.1.2.14.1.1.2	Subgroup_10	459	0	0	0	0	0	0	0	0	0	0	0	1	0	0	0	0	0	0	0	0	0	0	0	2	0	0	0	0	1	2	0	0	1	0	1	0	0	3	0	0	0	0	8	0	0	1
6	0.1.2.14.1.1.3	Thermoanaerobaculaceae_unclassified	98	0	0	0	0	0	0	0	0	0	0	0	0	0	0	0	0	0	0	0	0	0	0	0	0	0	0	0	0	0	0	0	0	0	0	0	0	0	4	0	0	0	0	0	0	0	0
3	0.1.2.15	Vicinamibacteria	26838	0	0	1	0	3	11	3	7	0	0	0	4	0	4	13	6	22	0	30	3	3	5	2	18	8	3	17	22	24	51	0	83	27	14	56	13	82	91	1	156	7	0	134	36	5	109
4	0.1.2.15.1	Subgroup_17	1933	0	0	0	0	0	0	0	1	0	0	0	0	0	0	1	0	2	0	2	0	1	0	1	4	0	0	2	2	0	0	0	6	2	4	0	1	28	17	0	17	3	0	18	7	1	19
5	0.1.2.15.1.1	Subgroup_17_fa	1933	0	0	0	0	0	0	0	1	0	0	0	0	0	0	1	0	2	0	2	0	1	0	1	4	0	0	2	2	0	0	0	6	2	4	0	1	28	17	0	17	3	0	18	7	1	19
6	0.1.2.15.1.1.1	Subgroup_17_ge	1933	0	0	0	0	0	0	0	1	0	0	0	0	0	0	1	0	2	0	2	0	1	0	1	4	0	0	2	2	0	0	0	6	2	4	0	1	28	17	0	17	3	0	18	7	1	19
4	0.1.2.15.2	Subgroup_9	99	0	0	0	0	0	0	0	0	0	0	0	0	0	0	0	0	0	0	0	0	0	0	0	0	0	0	0	0	0	0	0	6	0	0	0	0	0	0	0	7	0	0	0	0	0	3
5	0.1.2.15.2.1	Subgroup_9_fa	99	0	0	0	0	0	0	0	0	0	0	0	0	0	0	0	0	0	0	0	0	0	0	0	0	0	0	0	0	0	0	0	6	0	0	0	0	0	0	0	7	0	0	0	0	0	3
6	0.1.2.15.2.1.1	Subgroup_9_ge	99	0	0	0	0	0	0	0	0	0	0	0	0	0	0	0	0	0	0	0	0	0	0	0	0	0	0	0	0	0	0	0	6	0	0	0	0	0	0	0	7	0	0	0	0	0	3
4	0.1.2.15.3	Vicinamibacterales	23650	0	0	1	0	3	11	3	4	0	0	0	2	0	4	12	6	18	0	28	3	2	5	1	14	7	3	15	17	21	48	0	66	22	9	51	10	52	72	1	129	4	0	102	28	4	84
5	0.1.2.15.3.1	Vicinamibacteraceae	12697	0	0	1	0	2	2	2	3	0	0	0	0	0	3	3	4	7	0	10	0	0	5	0	8	6	1	9	12	8	28	0	32	10	6	33	9	26	34	0	62	1	0	40	14	3	51
6	0.1.2.15.3.1.1	Luteitalea	405	0	0	0	0	0	0	0	0	0	0	0	0	0	0	0	0	0	0	0	0	0	0	0	0	0	0	0	0	0	1	0	0	0	0	2	0	1	0	0	8	0	0	0	1	0	0
6	0.1.2.15.3.1.2	Vicinamibacter	359	0	0	0	0	0	0	0	1	0	0	0	0	0	0	0	0	0	0	0	0	0	1	0	0	0	0	0	0	0	0	0	1	0	0	0	0	5	3	0	7	0	0	7	0	1	2
6	0.1.2.15.3.1.3	Vicinamibacteraceae_ge	7418	0	0	0	0	1	1	0	1	0	0	0	0	0	3	1	3	5	0	10	0	0	4	0	8	6	0	7	11	7	27	0	29	7	3	20	6	10	13	0	17	1	0	13	6	1	14
6	0.1.2.15.3.1.4	Vicinamibacteraceae_unclassified	4324	0	0	1	0	0	1	2	1	0	0	0	0	0	0	2	1	2	0	0	0	0	0	0	0	0	1	2	1	0	0	0	2	2	3	8	3	10	16	0	27	0	0	19	4	1	29
6	0.1.2.15.3.1.5	uncultured	191	0	0	0	0	1	0	0	0	0	0	0	0	0	0	0	0	0	0	0	0	0	0	0	0	0	0	0	0	1	0	0	0	1	0	3	0	0	2	0	3	0	0	1	3	0	6
5	0.1.2.15.3.2	Vicinamibacterales_fa	910	0	0	0	0	0	0	1	0	0	0	0	0	0	0	1	0	0	0	0	2	0	0	0	0	0	1	0	1	2	6	0	4	0	0	0	0	6	1	0	4	0	0	7	0	0	4
6	0.1.2.15.3.2.1	Vicinamibacterales_ge	910	0	0	0	0	0	0	1	0	0	0	0	0	0	0	1	0	0	0	0	2	0	0	0	0	0	1	0	1	2	6	0	4	0	0	0	0	6	1	0	4	0	0	7	0	0	4
5	0.1.2.15.3.3	Vicinamibacterales_unclassified	5586	0	0	0	0	1	6	0	0	0	0	0	1	0	1	5	1	6	0	6	1	1	0	1	1	1	1	4	4	11	6	0	24	4	3	11	1	18	30	1	38	3	0	42	14	1	25
6	0.1.2.15.3.3.1	Vicinamibacterales_unclassified	5586	0	0	0	0	1	6	0	0	0	0	0	1	0	1	5	1	6	0	6	1	1	0	1	1	1	1	4	4	11	6	0	24	4	3	11	1	18	30	1	38	3	0	42	14	1	25
5	0.1.2.15.3.4	uncultured	4457	0	0	0	0	0	3	0	1	0	0	0	1	0	0	3	1	5	0	12	0	1	0	0	5	0	0	2	0	0	8	0	6	8	0	7	0	2	7	0	25	0	0	13	0	0	4
6	0.1.2.15.3.4.1	uncultured_ge	4457	0	0	0	0	0	3	0	1	0	0	0	1	0	0	3	1	5	0	12	0	1	0	0	5	0	0	2	0	0	8	0	6	8	0	7	0	2	7	0	25	0	0	13	0	0	4
4	0.1.2.15.4	Vicinamibacteria_unclassified	1156	0	0	0	0	0	0	0	2	0	0	0	2	0	0	0	0	2	0	0	0	0	0	0	0	1	0	0	3	3	3	0	5	3	1	5	2	2	2	0	3	0	0	14	1	0	3
5	0.1.2.15.4.1	Vicinamibacteria_unclassified	1156	0	0	0	0	0	0	0	2	0	0	0	2	0	0	0	0	2	0	0	0	0	0	0	0	1	0	0	3	3	3	0	5	3	1	5	2	2	2	0	3	0	0	14	1	0	3
6	0.1.2.15.4.1.1	Vicinamibacteria_unclassified	1156	0	0	0	0	0	0	0	2	0	0	0	2	0	0	0	0	2	0	0	0	0	0	0	0	1	0	0	3	3	3	0	5	3	1	5	2	2	2	0	3	0	0	14	1	0	3
2	0.1.3	Actinobacteriota	572356	29	0	10	15	108	278	1006	190	0	110	0	3188	67	80	252	267	3390	0	1552	515	783	1019	2300	851	317	242	1005	894	495	6805	0	2215	1204	3709	1235	4623	1054	1327	0	1549	156	1	1653	417	92	1405
3	0.1.3.1	Acidimicrobiia	36869	1	0	1	0	1	11	6	9	0	2	0	4	5	8	11	12	45	0	56	11	1	11	1	29	6	7	18	39	29	67	0	102	33	18	67	18	79	75	0	97	9	0	112	32	3	89
4	0.1.3.1.1	Acidimicrobiales	1198	0	0	0	0	0	0	0	1	0	0	0	0	1	0	2	0	0	0	1	0	0	0	0	0	0	0	0	0	3	0	0	2	1	1	0	0	0	8	0	1	0	0	0	3	1	0
5	0.1.3.1.1.1	Acidimicrobiaceae	60	0	0	0	0	0	0	0	1	0	0	0	0	0	0	1	0	0	0	0	0	0	0	0	0	0	0	0	0	0	0	0	0	0	0	0	0	0	0	0	1	0	0	0	0	0	0
6	0.1.3.1.1.1.1	Acidimicrobiaceae_ge	3	0	0	0	0	0	0	0	0	0	0	0	0	0	0	0	0	0	0	0	0	0	0	0	0	0	0	0	0	0	0	0	0	0	0	0	0	0	0	0	0	0	0	0	0	0	0
6	0.1.3.1.1.1.2	Acidimicrobiaceae_unclassified	52	0	0	0	0	0	0	0	1	0	0	0	0	0	0	1	0	0	0	0	0	0	0	0	0	0	0	0	0	0	0	0	0	0	0	0	0	0	0	0	1	0	0	0	0	0	0
6	0.1.3.1.1.1.3	Ferrimicrobium	1	0	0	0	0	0	0	0	0	0	0	0	0	0	0	0	0	0	0	0	0	0	0	0	0	0	0	0	0	0	0	0	0	0	0	0	0	0	0	0	0	0	0	0	0	0	0
6	0.1.3.1.1.1.4	uncultured	4	0	0	0	0	0	0	0	0	0	0	0	0	0	0	0	0	0	0	0	0	0	0	0	0	0	0	0	0	0	0	0	0	0	0	0	0	0	0	0	0	0	0	0	0	0	0
5	0.1.3.1.1.2	Acidimicrobiales_Incertae_Sedis	72	0	0	0	0	0	0	0	0	0	0	0	0	1	0	0	0	0	0	0	0	0	0	0	0	0	0	0	0	1	0	0	0	0	0	0	0	0	7	0	0	0	0	0	0	1	0
6	0.1.3.1.1.2.1	Aciditerrimonas	72	0	0	0	0	0	0	0	0	0	0	0	0	1	0	0	0	0	0	0	0	0	0	0	0	0	0	0	0	1	0	0	0	0	0	0	0	0	7	0	0	0	0	0	0	1	0
5	0.1.3.1.1.3	Acidimicrobiales_unclassified	1066	0	0	0	0	0	0	0	0	0	0	0	0	0	0	1	0	0	0	1	0	0	0	0	0	0	0	0	0	2	0	0	2	1	1	0	0	0	1	0	0	0	0	0	3	0	0
6	0.1.3.1.1.3.1	Acidimicrobiales_unclassified	1066	0	0	0	0	0	0	0	0	0	0	0	0	0	0	1	0	0	0	1	0	0	0	0	0	0	0	0	0	2	0	0	2	1	1	0	0	0	1	0	0	0	0	0	3	0	0
4	0.1.3.1.2	Acidimicrobiia_unclassified	8280	0	0	0	0	0	1	2	2	0	1	0	0	0	1	4	2	8	0	14	7	0	4	1	12	0	1	3	7	8	16	0	14	5	0	12	5	10	19	0	28	9	0	14	6	0	13
5	0.1.3.1.2.1	Acidimicrobiia_unclassified	8280	0	0	0	0	0	1	2	2	0	1	0	0	0	1	4	2	8	0	14	7	0	4	1	12	0	1	3	7	8	16	0	14	5	0	12	5	10	19	0	28	9	0	14	6	0	13
6	0.1.3.1.2.1.1	Acidimicrobiia_unclassified	8280	0	0	0	0	0	1	2	2	0	1	0	0	0	1	4	2	8	0	14	7	0	4	1	12	0	1	3	7	8	16	0	14	5	0	12	5	10	19	0	28	9	0	14	6	0	13
4	0.1.3.1.3	Actinomarinales	617	0	0	0	0	0	0	0	1	0	0	0	0	0	0	1	0	1	0	0	0	1	0	0	2	1	0	0	2	1	4	0	1	1	2	4	0	0	4	0	0	0	0	2	0	0	3
5	0.1.3.1.3.1	Actinomarinales_fa	10	0	0	0	0	0	0	0	0	0	0	0	0	0	0	0	0	0	0	0	0	0	0	0	0	0	0	0	0	0	1	0	0	0	0	0	0	0	0	0	0	0	0	0	0	0	0
6	0.1.3.1.3.1.1	Actinomarinales_ge	10	0	0	0	0	0	0	0	0	0	0	0	0	0	0	0	0	0	0	0	0	0	0	0	0	0	0	0	0	0	1	0	0	0	0	0	0	0	0	0	0	0	0	0	0	0	0
5	0.1.3.1.3.2	Actinomarinales_unclassified	28	0	0	0	0	0	0	0	0	0	0	0	0	0	0	1	0	0	0	0	0	0	0	0	0	0	0	0	0	1	0	0	0	0	0	0	0	0	0	0	0	0	0	0	0	0	2
6	0.1.3.1.3.2.1	Actinomarinales_unclassified	28	0	0	0	0	0	0	0	0	0	0	0	0	0	0	1	0	0	0	0	0	0	0	0	0	0	0	0	0	1	0	0	0	0	0	0	0	0	0	0	0	0	0	0	0	0	2
5	0.1.3.1.3.3	uncultured	579	0	0	0	0	0	0	0	1	0	0	0	0	0	0	0	0	1	0	0	0	1	0	0	2	1	0	0	2	0	3	0	1	1	2	4	0	0	4	0	0	0	0	2	0	0	1
6	0.1.3.1.3.3.1	uncultured_ge	579	0	0	0	0	0	0	0	1	0	0	0	0	0	0	0	0	1	0	0	0	1	0	0	2	1	0	0	2	0	3	0	1	1	2	4	0	0	4	0	0	0	0	2	0	0	1
4	0.1.3.1.4	IMCC26256	5329	0	0	0	0	1	2	0	2	0	0	0	0	0	2	1	1	11	0	4	0	0	5	0	3	0	1	3	1	3	8	0	26	9	2	10	2	18	3	0	10	0	0	29	5	1	14
5	0.1.3.1.4.1	IMCC26256_fa	5329	0	0	0	0	1	2	0	2	0	0	0	0	0	2	1	1	11	0	4	0	0	5	0	3	0	1	3	1	3	8	0	26	9	2	10	2	18	3	0	10	0	0	29	5	1	14
6	0.1.3.1.4.1.1	IMCC26256_ge	5329	0	0	0	0	1	2	0	2	0	0	0	0	0	2	1	1	11	0	4	0	0	5	0	3	0	1	3	1	3	8	0	26	9	2	10	2	18	3	0	10	0	0	29	5	1	14
4	0.1.3.1.5	Microtrichales	21382	1	0	1	0	0	8	4	3	0	1	0	4	4	5	3	9	25	0	37	4	0	2	0	12	5	5	12	29	14	39	0	59	17	13	41	11	51	41	0	58	0	0	67	18	1	59
5	0.1.3.1.5.1	Iamiaceae	1369	0	0	0	0	0	0	0	0	0	0	0	0	0	0	0	2	0	0	7	0	0	0	0	2	0	0	0	3	0	2	0	4	0	1	0	0	7	0	0	2	0	0	2	2	0	2
6	0.1.3.1.5.1.1	Iamia	1369	0	0	0	0	0	0	0	0	0	0	0	0	0	0	0	2	0	0	7	0	0	0	0	2	0	0	0	3	0	2	0	4	0	1	0	0	7	0	0	2	0	0	2	2	0	2
5	0.1.3.1.5.2	Ilumatobacteraceae	3209	1	0	0	0	0	0	0	1	0	0	0	1	0	1	0	0	1	0	2	1	0	0	0	0	0	0	2	5	1	5	0	16	9	1	5	3	6	13	0	18	0	0	14	5	0	13
6	0.1.3.1.5.2.1	CL500-29_marine_group	46	0	0	0	0	0	0	0	0	0	0	0	0	0	0	0	0	0	0	0	0	0	0	0	0	0	0	0	0	0	0	0	0	0	0	0	0	0	2	0	0	0	0	0	0	0	5
6	0.1.3.1.5.2.2	Ilumatobacter	50	0	0	0	0	0	0	0	0	0	0	0	0	0	0	0	0	0	0	0	0	0	0	0	0	0	0	0	0	0	1	0	1	0	0	1	0	0	0	0	1	0	0	1	0	0	0
6	0.1.3.1.5.2.3	Ilumatobacteraceae_ge	127	0	0	0	0	0	0	0	0	0	0	0	0	0	0	0	0	0	0	0	1	0	0	0	0	0	0	0	0	0	0	0	1	0	0	0	2	0	0	0	1	0	0	0	1	0	0
6	0.1.3.1.5.2.4	Ilumatobacteraceae_unclassified	790	0	0	0	0	0	0	0	0	0	0	0	1	0	0	0	0	1	0	2	0	0	0	0	0	0	0	0	1	1	2	0	4	0	0	2	0	6	6	0	15	0	0	12	0	0	7
6	0.1.3.1.5.2.5	uncultured	2196	1	0	0	0	0	0	0	1	0	0	0	0	0	1	0	0	0	0	0	0	0	0	0	0	0	0	2	4	0	2	0	10	9	1	2	1	0	5	0	1	0	0	1	4	0	1
5	0.1.3.1.5.3	Microtrichaceae	1417	0	0	0	0	0	2	0	0	0	0	0	0	1	3	1	2	2	0	1	0	0	0	0	1	1	0	1	0	0	3	0	1	0	0	0	0	4	2	0	2	0	0	1	0	0	5
6	0.1.3.1.5.3.1	Candidatus_Microthrix	3	0	0	0	0	0	0	0	0	0	0	0	0	0	0	0	0	0	0	0	0	0	0	0	0	0	0	0	0	0	0	0	0	0	0	0	0	0	0	0	0	0	0	0	0	0	0
6	0.1.3.1.5.3.2	IMCC26207	57	0	0	0	0	0	0	0	0	0	0	0	0	0	2	0	0	0	0	0	0	0	0	0	0	0	0	0	0	0	0	0	0	0	0	0	0	1	0	0	1	0	0	1	0	0	0
6	0.1.3.1.5.3.3	Microtrichaceae_unclassified	1275	0	0	0	0	0	1	0	0	0	0	0	0	1	0	1	2	2	0	1	0	0	0	0	0	1	0	1	0	0	3	0	1	0	0	0	0	2	1	0	1	0	0	0	0	0	2
6	0.1.3.1.5.3.4	Sva0996_marine_group	76	0	0	0	0	0	1	0	0	0	0	0	0	0	1	0	0	0	0	0	0	0	0	0	1	0	0	0	0	0	0	0	0	0	0	0	0	1	1	0	0	0	0	0	0	0	2
6	0.1.3.1.5.3.5	uncultured	6	0	0	0	0	0	0	0	0	0	0	0	0	0	0	0	0	0	0	0	0	0	0	0	0	0	0	0	0	0	0	0	0	0	0	0	0	0	0	0	0	0	0	0	0	0	1
5	0.1.3.1.5.4	Microtrichales_fa	599	0	0	0	0	0	0	0	0	0	0	0	0	0	0	0	0	0	0	0	0	0	0	0	1	0	0	0	0	0	2	0	0	0	0	0	1	6	3	0	4	0	0	14	2	0	6
6	0.1.3.1.5.4.1	Microtrichales_ge	599	0	0	0	0	0	0	0	0	0	0	0	0	0	0	0	0	0	0	0	0	0	0	0	1	0	0	0	0	0	2	0	0	0	0	0	1	6	3	0	4	0	0	14	2	0	6
5	0.1.3.1.5.5	Microtrichales_unclassified	14611	0	0	1	0	0	6	4	2	0	1	0	3	3	1	2	5	22	0	27	1	0	2	0	8	4	5	9	21	12	27	0	38	8	11	36	7	28	23	0	31	0	0	36	9	1	30
6	0.1.3.1.5.5.1	Microtrichales_unclassified	14611	0	0	1	0	0	6	4	2	0	1	0	3	3	1	2	5	22	0	27	1	0	2	0	8	4	5	9	21	12	27	0	38	8	11	36	7	28	23	0	31	0	0	36	9	1	30
5	0.1.3.1.5.6	uncultured	177	0	0	0	0	0	0	0	0	0	0	0	0	0	0	0	0	0	0	0	2	0	0	0	0	0	0	0	0	1	0	0	0	0	0	0	0	0	0	0	1	0	0	0	0	0	3
6	0.1.3.1.5.6.1	uncultured_ge	177	0	0	0	0	0	0	0	0	0	0	0	0	0	0	0	0	0	0	0	2	0	0	0	0	0	0	0	0	1	0	0	0	0	0	0	0	0	0	0	1	0	0	0	0	0	3
4	0.1.3.1.6	uncultured	63	0	0	0	0	0	0	0	0	0	0	0	0	0	0	0	0	0	0	0	0	0	0	0	0	0	0	0	0	0	0	0	0	0	0	0	0	0	0	0	0	0	0	0	0	0	0
5	0.1.3.1.6.1	uncultured_fa	63	0	0	0	0	0	0	0	0	0	0	0	0	0	0	0	0	0	0	0	0	0	0	0	0	0	0	0	0	0	0	0	0	0	0	0	0	0	0	0	0	0	0	0	0	0	0
6	0.1.3.1.6.1.1	uncultured_ge	63	0	0	0	0	0	0	0	0	0	0	0	0	0	0	0	0	0	0	0	0	0	0	0	0	0	0	0	0	0	0	0	0	0	0	0	0	0	0	0	0	0	0	0	0	0	0
3	0.1.3.2	Actinobacteria	392101	16	0	6	10	80	196	965	131	0	100	0	3156	49	45	176	200	3164	0	1208	455	756	940	2254	708	251	153	871	609	324	6228	0	1451	1016	3610	887	4412	698	873	0	1008	102	1	1081	289	56	995
4	0.1.3.2.1	0319-7L14	3	0	0	0	0	0	0	0	0	0	0	0	0	0	0	0	0	0	0	0	0	0	0	0	0	0	0	0	0	0	0	0	0	0	0	0	0	0	0	0	0	0	0	0	0	0	0
5	0.1.3.2.1.1	0319-7L14_fa	3	0	0	0	0	0	0	0	0	0	0	0	0	0	0	0	0	0	0	0	0	0	0	0	0	0	0	0	0	0	0	0	0	0	0	0	0	0	0	0	0	0	0	0	0	0	0
6	0.1.3.2.1.1.1	0319-7L14_ge	3	0	0	0	0	0	0	0	0	0	0	0	0	0	0	0	0	0	0	0	0	0	0	0	0	0	0	0	0	0	0	0	0	0	0	0	0	0	0	0	0	0	0	0	0	0	0
4	0.1.3.2.2	Actinobacteria_unclassified	114161	1	0	1	4	19	68	21	48	0	2	0	31	3	12	58	24	93	0	142	30	13	33	22	73	58	38	87	82	89	201	0	298	105	56	224	81	262	315	0	376	33	1	460	92	21	382
5	0.1.3.2.2.1	Actinobacteria_unclassified	114161	1	0	1	4	19	68	21	48	0	2	0	31	3	12	58	24	93	0	142	30	13	33	22	73	58	38	87	82	89	201	0	298	105	56	224	81	262	315	0	376	33	1	460	92	21	382
6	0.1.3.2.2.1.1	Actinobacteria_unclassified	114161	1	0	1	4	19	68	21	48	0	2	0	31	3	12	58	24	93	0	142	30	13	33	22	73	58	38	87	82	89	201	0	298	105	56	224	81	262	315	0	376	33	1	460	92	21	382
4	0.1.3.2.3	Actinomycetales	244	0	0	0	0	0	0	0	0	0	0	0	0	0	0	0	0	4	0	1	0	0	0	0	2	0	1	1	2	3	4	0	1	2	0	2	4	0	0	0	4	4	0	0	0	1	0
5	0.1.3.2.3.1	Actinomycetaceae	244	0	0	0	0	0	0	0	0	0	0	0	0	0	0	0	0	4	0	1	0	0	0	0	2	0	1	1	2	3	4	0	1	2	0	2	4	0	0	0	4	4	0	0	0	1	0
6	0.1.3.2.3.1.1	Actinobaculum	2	0	0	0	0	0	0	0	0	0	0	0	0	0	0	0	0	0	0	0	0	0	0	0	0	0	0	0	0	0	0	0	0	0	0	0	0	0	0	0	0	0	0	0	0	0	0
6	0.1.3.2.3.1.2	Actinomyces	49	0	0	0	0	0	0	0	0	0	0	0	0	0	0	0	0	2	0	1	0	0	0	0	1	0	0	0	2	3	0	0	0	1	0	0	0	0	0	0	0	0	0	0	0	0	0
6	0.1.3.2.3.1.3	Actinomycetaceae_ge	3	0	0	0	0	0	0	0	0	0	0	0	0	0	0	0	0	0	0	0	0	0	0	0	0	0	0	0	0	0	0	0	0	0	0	0	0	0	0	0	0	0	0	0	0	0	0
6	0.1.3.2.3.1.4	Actinomycetaceae_unclassified	43	0	0	0	0	0	0	0	0	0	0	0	0	0	0	0	0	0	0	0	0	0	0	0	1	0	1	0	0	0	0	0	0	0	0	0	0	0	0	0	3	0	0	0	0	1	0
6	0.1.3.2.3.1.5	Actinotignum	33	0	0	0	0	0	0	0	0	0	0	0	0	0	0	0	0	0	0	0	0	0	0	0	0	0	0	0	0	0	0	0	0	0	0	2	0	0	0	0	0	0	0	0	0	0	0
6	0.1.3.2.3.1.6	Flaviflexus	6	0	0	0	0	0	0	0	0	0	0	0	0	0	0	0	0	0	0	0	0	0	0	0	0	0	0	0	0	0	0	0	0	0	0	0	0	0	0	0	0	4	0	0	0	0	0
6	0.1.3.2.3.1.7	Trueperella	92	0	0	0	0	0	0	0	0	0	0	0	0	0	0	0	0	0	0	0	0	0	0	0	0	0	0	0	0	0	0	0	0	0	0	0	0	0	0	0	1	0	0	0	0	0	0
6	0.1.3.2.3.1.8	uncultured	16	0	0	0	0	0	0	0	0	0	0	0	0	0	0	0	0	2	0	0	0	0	0	0	0	0	0	1	0	0	4	0	1	1	0	0	4	0	0	0	0	0	0	0	0	0	0
4	0.1.3.2.4	Bifidobacteriales	34075	14	0	2	1	17	21	893	14	0	91	0	3078	20	5	4	109	2838	0	764	378	719	822	2199	429	110	40	633	163	55	5590	0	461	740	3423	203	4148	8	13	0	2	14	0	19	23	0	19
5	0.1.3.2.4.1	Bifidobacteriaceae	34075	14	0	2	1	17	21	893	14	0	91	0	3078	20	5	4	109	2838	0	764	378	719	822	2199	429	110	40	633	163	55	5590	0	461	740	3423	203	4148	8	13	0	2	14	0	19	23	0	19
6	0.1.3.2.4.1.1	Aeriscardovia	31624	14	0	2	1	11	20	886	13	0	90	0	3046	3	5	4	4	2795	0	285	368	708	821	2184	426	105	39	591	117	54	5524	0	331	720	3411	197	4059	8	9	0	1	3	0	17	22	0	17
6	0.1.3.2.4.1.2	Bifidobacteriaceae_ge	34	0	0	0	0	0	0	0	0	0	0	0	0	0	0	0	0	0	0	6	0	0	0	0	0	0	0	4	0	0	0	0	5	0	0	0	0	0	0	0	0	0	0	0	0	0	0
6	0.1.3.2.4.1.3	Bifidobacteriaceae_unclassified	402	0	0	0	0	0	0	5	0	0	1	0	17	0	0	0	8	35	0	22	7	8	0	11	1	3	1	7	5	1	42	0	1	16	10	2	55	0	0	0	0	1	0	0	0	0	1
6	0.1.3.2.4.1.4	Bifidobacterium	1902	0	0	0	0	6	0	1	0	0	0	0	5	17	0	0	97	1	0	448	2	0	1	0	1	2	0	29	38	0	8	0	123	0	0	4	11	0	2	0	0	10	0	2	1	0	1
6	0.1.3.2.4.1.5	Gardnerella	4	0	0	0	0	0	0	0	0	0	0	0	0	0	0	0	0	0	0	0	0	0	0	0	0	0	0	0	0	0	0	0	0	0	0	0	0	0	2	0	0	0	0	0	0	0	0
6	0.1.3.2.4.1.6	Pseudoscardovia	99	0	0	0	0	0	1	1	1	0	0	0	9	0	0	0	0	6	0	2	1	3	0	4	1	0	0	1	3	0	16	0	0	3	0	0	23	0	0	0	0	0	0	0	0	0	0
6	0.1.3.2.4.1.7	uncultured	10	0	0	0	0	0	0	0	0	0	0	0	1	0	0	0	0	1	0	1	0	0	0	0	0	0	0	1	0	0	0	0	1	1	2	0	0	0	0	0	1	0	0	0	0	0	0
4	0.1.3.2.5	Catenulisporales	14	0	0	0	0	0	0	0	0	0	0	0	0	0	0	0	0	0	0	0	0	0	0	0	0	0	0	0	0	0	0	0	0	0	0	0	0	0	0	0	0	0	0	0	0	0	0
5	0.1.3.2.5.1	Catenulisporaceae	14	0	0	0	0	0	0	0	0	0	0	0	0	0	0	0	0	0	0	0	0	0	0	0	0	0	0	0	0	0	0	0	0	0	0	0	0	0	0	0	0	0	0	0	0	0	0
6	0.1.3.2.5.1.1	Catenulispora	14	0	0	0	0	0	0	0	0	0	0	0	0	0	0	0	0	0	0	0	0	0	0	0	0	0	0	0	0	0	0	0	0	0	0	0	0	0	0	0	0	0	0	0	0	0	0
4	0.1.3.2.6	Corynebacteriales	42738	0	0	1	1	4	23	9	11	0	1	0	7	3	2	21	16	40	0	37	6	4	15	8	35	19	18	22	81	27	62	0	123	24	17	67	15	90	66	0	100	13	0	80	36	14	92
5	0.1.3.2.6.1	Corynebacteriaceae	3359	0	0	0	0	0	0	1	0	0	0	0	2	0	1	3	0	1	0	4	0	0	0	0	2	2	0	1	7	1	2	0	8	0	3	5	0	1	0	0	0	12	0	1	3	5	6
6	0.1.3.2.6.1.1	Corynebacteriaceae_ge	914	0	0	0	0	0	0	1	0	0	0	0	0	0	1	3	0	1	0	0	0	0	0	0	2	2	0	1	2	1	0	0	1	0	2	3	0	0	0	0	0	0	0	0	0	0	0
6	0.1.3.2.6.1.2	Corynebacteriaceae_unclassified	82	0	0	0	0	0	0	0	0	0	0	0	0	0	0	0	0	0	0	0	0	0	0	0	0	0	0	0	0	0	0	0	2	0	0	0	0	0	0	0	0	0	0	0	0	0	0
6	0.1.3.2.6.1.3	Corynebacterium	1912	0	0	0	0	0	0	0	0	0	0	0	2	0	0	0	0	0	0	3	0	0	0	0	0	0	0	0	2	0	1	0	1	0	0	1	0	1	0	0	0	12	0	1	0	5	2
6	0.1.3.2.6.1.4	Lawsonella	447	0	0	0	0	0	0	0	0	0	0	0	0	0	0	0	0	0	0	1	0	0	0	0	0	0	0	0	3	0	1	0	4	0	1	1	0	0	0	0	0	0	0	0	3	0	4
6	0.1.3.2.6.1.5	Turicella	4	0	0	0	0	0	0	0	0	0	0	0	0	0	0	0	0	0	0	0	0	0	0	0	0	0	0	0	0	0	0	0	0	0	0	0	0	0	0	0	0	0	0	0	0	0	0
5	0.1.3.2.6.2	Corynebacteriales_Incertae_Sedis	8	0	0	0	0	0	0	0	0	0	0	0	0	0	0	0	0	0	0	0	0	0	0	0	0	0	0	0	0	0	0	0	0	0	0	0	0	0	0	0	0	0	0	0	0	0	0
6	0.1.3.2.6.2.1	Tomitella	8	0	0	0	0	0	0	0	0	0	0	0	0	0	0	0	0	0	0	0	0	0	0	0	0	0	0	0	0	0	0	0	0	0	0	0	0	0	0	0	0	0	0	0	0	0	0
5	0.1.3.2.6.3	Corynebacteriales_unclassified	22668	0	0	1	1	2	10	5	9	0	1	0	1	0	0	13	5	20	0	12	3	3	12	6	27	7	10	16	41	15	38	0	69	7	11	31	10	62	35	0	67	0	0	56	24	4	77
6	0.1.3.2.6.3.1	Corynebacteriales_unclassified	22668	0	0	1	1	2	10	5	9	0	1	0	1	0	0	13	5	20	0	12	3	3	12	6	27	7	10	16	41	15	38	0	69	7	11	31	10	62	35	0	67	0	0	56	24	4	77
5	0.1.3.2.6.4	Dietziaceae	9	0	0	0	0	0	0	0	0	0	0	0	0	0	0	0	0	0	0	0	0	0	0	0	0	0	0	0	0	0	0	0	0	0	0	0	0	0	0	0	0	1	0	0	0	0	0
6	0.1.3.2.6.4.1	Dietzia	9	0	0	0	0	0	0	0	0	0	0	0	0	0	0	0	0	0	0	0	0	0	0	0	0	0	0	0	0	0	0	0	0	0	0	0	0	0	0	0	0	1	0	0	0	0	0
5	0.1.3.2.6.5	Mycobacteriaceae	15843	0	0	0	0	2	13	3	2	0	0	0	4	3	1	5	11	19	0	21	3	1	3	2	6	10	7	5	33	11	22	0	46	17	2	28	4	23	26	0	25	0	0	21	9	5	5
6	0.1.3.2.6.5.1	Hoyosella	789	0	0	0	0	0	2	0	0	0	0	0	0	0	0	1	0	2	0	0	1	0	0	0	0	1	0	0	4	0	6	0	0	1	0	15	0	1	8	0	4	0	0	8	0	1	0
6	0.1.3.2.6.5.2	Mycobacteriaceae_unclassified	2454	0	0	0	0	0	1	0	0	0	0	0	0	1	0	1	1	10	0	3	0	1	1	0	2	1	2	1	6	1	7	0	9	4	1	1	0	6	11	0	4	0	0	7	4	1	1
6	0.1.3.2.6.5.3	Mycobacterium	12600	0	0	0	0	2	10	3	2	0	0	0	4	2	1	3	10	7	0	18	2	0	2	2	4	8	5	4	23	10	9	0	37	12	1	12	4	16	7	0	17	0	0	6	5	3	4
5	0.1.3.2.6.6	Nocardiaceae	634	0	0	0	0	0	0	0	0	0	0	0	0	0	0	0	0	0	0	0	0	0	0	0	0	0	1	0	0	0	0	0	0	0	1	0	1	0	5	0	5	0	0	2	0	0	4
6	0.1.3.2.6.6.1	Millisia	36	0	0	0	0	0	0	0	0	0	0	0	0	0	0	0	0	0	0	0	0	0	0	0	0	0	0	0	0	0	0	0	0	0	0	0	0	0	0	0	0	0	0	0	0	0	0
6	0.1.3.2.6.6.2	Nocardia	211	0	0	0	0	0	0	0	0	0	0	0	0	0	0	0	0	0	0	0	0	0	0	0	0	0	1	0	0	0	0	0	0	0	0	0	1	0	0	0	0	0	0	0	0	0	0
6	0.1.3.2.6.6.3	Nocardiaceae_ge	1	0	0	0	0	0	0	0	0	0	0	0	0	0	0	0	0	0	0	0	0	0	0	0	0	0	0	0	0	0	0	0	0	0	0	0	0	0	0	0	0	0	0	0	0	0	0
6	0.1.3.2.6.6.4	Nocardiaceae_unclassified	314	0	0	0	0	0	0	0	0	0	0	0	0	0	0	0	0	0	0	0	0	0	0	0	0	0	0	0	0	0	0	0	0	0	0	0	0	0	5	0	5	0	0	0	0	0	4
6	0.1.3.2.6.6.5	Rhodococcus	43	0	0	0	0	0	0	0	0	0	0	0	0	0	0	0	0	0	0	0	0	0	0	0	0	0	0	0	0	0	0	0	0	0	1	0	0	0	0	0	0	0	0	0	0	0	0
6	0.1.3.2.6.6.6	Skermania	4	0	0	0	0	0	0	0	0	0	0	0	0	0	0	0	0	0	0	0	0	0	0	0	0	0	0	0	0	0	0	0	0	0	0	0	0	0	0	0	0	0	0	0	0	0	0
6	0.1.3.2.6.6.7	Smaragdicoccus	22	0	0	0	0	0	0	0	0	0	0	0	0	0	0	0	0	0	0	0	0	0	0	0	0	0	0	0	0	0	0	0	0	0	0	0	0	0	0	0	0	0	0	2	0	0	0
6	0.1.3.2.6.6.8	Williamsia	3	0	0	0	0	0	0	0	0	0	0	0	0	0	0	0	0	0	0	0	0	0	0	0	0	0	0	0	0	0	0	0	0	0	0	0	0	0	0	0	0	0	0	0	0	0	0
5	0.1.3.2.6.7	Segniliparaceae	188	0	0	0	0	0	0	0	0	0	0	0	0	0	0	0	0	0	0	0	0	0	0	0	0	0	0	0	0	0	0	0	0	0	0	3	0	4	0	0	1	0	0	0	0	0	0
6	0.1.3.2.6.7.1	Segniliparaceae_unclassified	24	0	0	0	0	0	0	0	0	0	0	0	0	0	0	0	0	0	0	0	0	0	0	0	0	0	0	0	0	0	0	0	0	0	0	0	0	3	0	0	0	0	0	0	0	0	0
6	0.1.3.2.6.7.2	Segniliparus	1	0	0	0	0	0	0	0	0	0	0	0	0	0	0	0	0	0	0	0	0	0	0	0	0	0	0	0	0	0	0	0	0	0	0	0	0	0	0	0	0	0	0	0	0	0	0
6	0.1.3.2.6.7.3	uncultured	163	0	0	0	0	0	0	0	0	0	0	0	0	0	0	0	0	0	0	0	0	0	0	0	0	0	0	0	0	0	0	0	0	0	0	3	0	1	0	0	1	0	0	0	0	0	0
5	0.1.3.2.6.8	Tsukamurellaceae	29	0	0	0	0	0	0	0	0	0	0	0	0	0	0	0	0	0	0	0	0	0	0	0	0	0	0	0	0	0	0	0	0	0	0	0	0	0	0	0	2	0	0	0	0	0	0
6	0.1.3.2.6.8.1	Tsukamurella	29	0	0	0	0	0	0	0	0	0	0	0	0	0	0	0	0	0	0	0	0	0	0	0	0	0	0	0	0	0	0	0	0	0	0	0	0	0	0	0	2	0	0	0	0	0	0
4	0.1.3.2.7	Euzebyales	6	0	0	0	0	0	0	0	0	0	0	0	0	0	0	0	0	0	0	0	0	0	0	0	0	0	0	0	0	0	0	0	0	0	0	0	0	0	0	0	0	0	0	0	0	0	0
5	0.1.3.2.7.1	Euzebyaceae	6	0	0	0	0	0	0	0	0	0	0	0	0	0	0	0	0	0	0	0	0	0	0	0	0	0	0	0	0	0	0	0	0	0	0	0	0	0	0	0	0	0	0	0	0	0	0
6	0.1.3.2.7.1.1	Egibacter	2	0	0	0	0	0	0	0	0	0	0	0	0	0	0	0	0	0	0	0	0	0	0	0	0	0	0	0	0	0	0	0	0	0	0	0	0	0	0	0	0	0	0	0	0	0	0
6	0.1.3.2.7.1.2	Euzebya	2	0	0	0	0	0	0	0	0	0	0	0	0	0	0	0	0	0	0	0	0	0	0	0	0	0	0	0	0	0	0	0	0	0	0	0	0	0	0	0	0	0	0	0	0	0	0
6	0.1.3.2.7.1.3	Euzebyaceae_unclassified	2	0	0	0	0	0	0	0	0	0	0	0	0	0	0	0	0	0	0	0	0	0	0	0	0	0	0	0	0	0	0	0	0	0	0	0	0	0	0	0	0	0	0	0	0	0	0
4	0.1.3.2.8	FFCH16263	96	0	0	0	0	0	0	0	0	0	0	0	0	0	0	0	0	0	0	0	0	0	0	0	0	0	0	0	0	0	0	0	0	0	1	0	0	2	0	0	0	0	0	0	0	0	1
5	0.1.3.2.8.1	FFCH16263_fa	96	0	0	0	0	0	0	0	0	0	0	0	0	0	0	0	0	0	0	0	0	0	0	0	0	0	0	0	0	0	0	0	0	0	1	0	0	2	0	0	0	0	0	0	0	0	1
6	0.1.3.2.8.1.1	FFCH16263_ge	96	0	0	0	0	0	0	0	0	0	0	0	0	0	0	0	0	0	0	0	0	0	0	0	0	0	0	0	0	0	0	0	0	0	1	0	0	2	0	0	0	0	0	0	0	0	1
4	0.1.3.2.9	Frankiales	6405	0	0	0	0	0	4	0	0	0	0	0	0	0	3	3	1	0	0	2	1	2	4	0	4	3	0	10	1	9	15	0	30	3	10	2	0	28	15	0	24	0	0	23	4	1	11
5	0.1.3.2.9.1	Acidothermaceae	35	0	0	0	0	0	0	0	0	0	0	0	0	0	0	0	0	0	0	0	0	0	0	0	1	0	0	0	0	0	0	0	0	0	0	0	0	0	0	0	0	0	0	0	0	0	0
6	0.1.3.2.9.1.1	Acidothermus	35	0	0	0	0	0	0	0	0	0	0	0	0	0	0	0	0	0	0	0	0	0	0	0	1	0	0	0	0	0	0	0	0	0	0	0	0	0	0	0	0	0	0	0	0	0	0
5	0.1.3.2.9.2	Cryptosporangiaceae	113	0	0	0	0	0	0	0	0	0	0	0	0	0	0	0	0	0	0	0	0	0	0	0	0	0	0	0	0	0	0	0	0	0	0	0	0	0	0	0	0	0	0	0	0	0	0
6	0.1.3.2.9.2.1	Cryptosporangium	113	0	0	0	0	0	0	0	0	0	0	0	0	0	0	0	0	0	0	0	0	0	0	0	0	0	0	0	0	0	0	0	0	0	0	0	0	0	0	0	0	0	0	0	0	0	0
5	0.1.3.2.9.3	Frankiaceae	28	0	0	0	0	0	0	0	0	0	0	0	0	0	0	0	0	0	0	0	0	0	0	0	0	0	0	0	0	0	0	0	0	0	0	0	0	0	0	0	0	0	0	0	0	0	0
6	0.1.3.2.9.3.1	Frankia	1	0	0	0	0	0	0	0	0	0	0	0	0	0	0	0	0	0	0	0	0	0	0	0	0	0	0	0	0	0	0	0	0	0	0	0	0	0	0	0	0	0	0	0	0	0	0
6	0.1.3.2.9.3.2	Frankiaceae_unclassified	8	0	0	0	0	0	0	0	0	0	0	0	0	0	0	0	0	0	0	0	0	0	0	0	0	0	0	0	0	0	0	0	0	0	0	0	0	0	0	0	0	0	0	0	0	0	0
6	0.1.3.2.9.3.3	Jatrophihabitans	19	0	0	0	0	0	0	0	0	0	0	0	0	0	0	0	0	0	0	0	0	0	0	0	0	0	0	0	0	0	0	0	0	0	0	0	0	0	0	0	0	0	0	0	0	0	0
5	0.1.3.2.9.4	Frankiales_fa	1047	0	0	0	0	0	2	0	0	0	0	0	0	0	1	0	0	0	0	0	0	0	0	0	0	0	0	0	0	0	5	0	0	1	1	2	0	6	1	0	6	0	0	11	1	0	2
6	0.1.3.2.9.4.1	Frankiales_ge	1047	0	0	0	0	0	2	0	0	0	0	0	0	0	1	0	0	0	0	0	0	0	0	0	0	0	0	0	0	0	5	0	0	1	1	2	0	6	1	0	6	0	0	11	1	0	2
5	0.1.3.2.9.5	Frankiales_unclassified	2751	0	0	0	0	0	1	0	0	0	0	0	0	0	2	3	1	0	0	1	1	1	1	0	3	0	0	8	0	8	6	0	21	0	4	0	0	10	3	0	10	0	0	5	3	0	4
6	0.1.3.2.9.5.1	Frankiales_unclassified	2751	0	0	0	0	0	1	0	0	0	0	0	0	0	2	3	1	0	0	1	1	1	1	0	3	0	0	8	0	8	6	0	21	0	4	0	0	10	3	0	10	0	0	5	3	0	4
5	0.1.3.2.9.6	Geodermatophilaceae	690	0	0	0	0	0	1	0	0	0	0	0	0	0	0	0	0	0	0	0	0	0	1	0	0	1	0	0	0	0	2	0	4	0	0	0	0	0	3	0	2	0	0	5	0	1	0
6	0.1.3.2.9.6.1	Blastococcus	142	0	0	0	0	0	0	0	0	0	0	0	0	0	0	0	0	0	0	0	0	0	0	0	0	0	0	0	0	0	2	0	0	0	0	0	0	0	1	0	1	0	0	1	0	0	0
6	0.1.3.2.9.6.2	Geodermatophilaceae_ge	8	0	0	0	0	0	0	0	0	0	0	0	0	0	0	0	0	0	0	0	0	0	0	0	0	0	0	0	0	0	0	0	0	0	0	0	0	0	0	0	0	0	0	0	0	0	0
6	0.1.3.2.9.6.3	Geodermatophilaceae_unclassified	123	0	0	0	0	0	0	0	0	0	0	0	0	0	0	0	0	0	0	0	0	0	0	0	0	0	0	0	0	0	0	0	0	0	0	0	0	0	2	0	1	0	0	4	0	1	0
6	0.1.3.2.9.6.4	Geodermatophilus	384	0	0	0	0	0	1	0	0	0	0	0	0	0	0	0	0	0	0	0	0	0	1	0	0	1	0	0	0	0	0	0	4	0	0	0	0	0	0	0	0	0	0	0	0	0	0
6	0.1.3.2.9.6.5	Klenkia	6	0	0	0	0	0	0	0	0	0	0	0	0	0	0	0	0	0	0	0	0	0	0	0	0	0	0	0	0	0	0	0	0	0	0	0	0	0	0	0	0	0	0	0	0	0	0
6	0.1.3.2.9.6.6	Modestobacter	27	0	0	0	0	0	0	0	0	0	0	0	0	0	0	0	0	0	0	0	0	0	0	0	0	0	0	0	0	0	0	0	0	0	0	0	0	0	0	0	0	0	0	0	0	0	0
5	0.1.3.2.9.7	Nakamurellaceae	1374	0	0	0	0	0	0	0	0	0	0	0	0	0	0	0	0	0	0	1	0	1	2	0	0	2	0	2	1	1	1	0	3	2	5	0	0	1	5	0	1	0	0	2	0	0	5
6	0.1.3.2.9.7.1	Nakamurella	1374	0	0	0	0	0	0	0	0	0	0	0	0	0	0	0	0	0	0	1	0	1	2	0	0	2	0	2	1	1	1	0	3	2	5	0	0	1	5	0	1	0	0	2	0	0	5
5	0.1.3.2.9.8	Sporichthyaceae	340	0	0	0	0	0	0	0	0	0	0	0	0	0	0	0	0	0	0	0	0	0	0	0	0	0	0	0	0	0	1	0	2	0	0	0	0	11	3	0	4	0	0	0	0	0	0
6	0.1.3.2.9.8.1	Candidatus_Planktophila	1	0	0	0	0	0	0	0	0	0	0	0	0	0	0	0	0	0	0	0	0	0	0	0	0	0	0	0	0	0	0	0	0	0	0	0	0	0	0	0	0	0	0	0	0	0	0
6	0.1.3.2.9.8.2	Longivirga	266	0	0	0	0	0	0	0	0	0	0	0	0	0	0	0	0	0	0	0	0	0	0	0	0	0	0	0	0	0	0	0	1	0	0	0	0	10	2	0	3	0	0	0	0	0	0
6	0.1.3.2.9.8.3	Sporichthya	6	0	0	0	0	0	0	0	0	0	0	0	0	0	0	0	0	0	0	0	0	0	0	0	0	0	0	0	0	0	0	0	0	0	0	0	0	0	0	0	0	0	0	0	0	0	0
6	0.1.3.2.9.8.4	Sporichthyaceae_ge	2	0	0	0	0	0	0	0	0	0	0	0	0	0	0	0	0	0	0	0	0	0	0	0	0	0	0	0	0	0	0	0	0	0	0	0	0	0	0	0	0	0	0	0	0	0	0
6	0.1.3.2.9.8.5	Sporichthyaceae_unclassified	50	0	0	0	0	0	0	0	0	0	0	0	0	0	0	0	0	0	0	0	0	0	0	0	0	0	0	0	0	0	1	0	1	0	0	0	0	1	1	0	1	0	0	0	0	0	0
6	0.1.3.2.9.8.6	hgcI_clade	1	0	0	0	0	0	0	0	0	0	0	0	0	0	0	0	0	0	0	0	0	0	0	0	0	0	0	0	0	0	0	0	0	0	0	0	0	0	0	0	0	0	0	0	0	0	0
6	0.1.3.2.9.8.7	uncultured	14	0	0	0	0	0	0	0	0	0	0	0	0	0	0	0	0	0	0	0	0	0	0	0	0	0	0	0	0	0	0	0	0	0	0	0	0	0	0	0	0	0	0	0	0	0	0
5	0.1.3.2.9.9	uncultured	27	0	0	0	0	0	0	0	0	0	0	0	0	0	0	0	0	0	0	0	0	0	0	0	0	0	0	0	0	0	0	0	0	0	0	0	0	0	0	0	1	0	0	0	0	0	0
6	0.1.3.2.9.9.1	uncultured_ge	27	0	0	0	0	0	0	0	0	0	0	0	0	0	0	0	0	0	0	0	0	0	0	0	0	0	0	0	0	0	0	0	0	0	0	0	0	0	0	0	1	0	0	0	0	0	0
4	0.1.3.2.10	Kineosporiales	42	0	0	0	0	0	0	0	0	0	0	0	2	0	0	0	1	0	0	0	0	0	0	0	0	0	0	0	0	0	0	0	2	0	1	1	0	0	0	0	0	0	0	0	0	0	0
5	0.1.3.2.10.1	Kineosporiaceae	42	0	0	0	0	0	0	0	0	0	0	0	2	0	0	0	1	0	0	0	0	0	0	0	0	0	0	0	0	0	0	0	2	0	1	1	0	0	0	0	0	0	0	0	0	0	0
6	0.1.3.2.10.1.1	Angustibacter	5	0	0	0	0	0	0	0	0	0	0	0	0	0	0	0	0	0	0	0	0	0	0	0	0	0	0	0	0	0	0	0	2	0	0	1	0	0	0	0	0	0	0	0	0	0	0
6	0.1.3.2.10.1.2	Kineococcus	5	0	0	0	0	0	0	0	0	0	0	0	1	0	0	0	0	0	0	0	0	0	0	0	0	0	0	0	0	0	0	0	0	0	1	0	0	0	0	0	0	0	0	0	0	0	0
6	0.1.3.2.10.1.3	Kineosporia	2	0	0	0	0	0	0	0	0	0	0	0	0	0	0	0	0	0	0	0	0	0	0	0	0	0	0	0	0	0	0	0	0	0	0	0	0	0	0	0	0	0	0	0	0	0	0
6	0.1.3.2.10.1.4	Kineosporiaceae_unclassified	27	0	0	0	0	0	0	0	0	0	0	0	1	0	0	0	0	0	0	0	0	0	0	0	0	0	0	0	0	0	0	0	0	0	0	0	0	0	0	0	0	0	0	0	0	0	0
6	0.1.3.2.10.1.5	Quadrisphaera	2	0	0	0	0	0	0	0	0	0	0	0	0	0	0	0	1	0	0	0	0	0	0	0	0	0	0	0	0	0	0	0	0	0	0	0	0	0	0	0	0	0	0	0	0	0	0
6	0.1.3.2.10.1.6	uncultured	1	0	0	0	0	0	0	0	0	0	0	0	0	0	0	0	0	0	0	0	0	0	0	0	0	0	0	0	0	0	0	0	0	0	0	0	0	0	0	0	0	0	0	0	0	0	0
4	0.1.3.2.11	Micrococcales	28362	1	0	1	1	3	13	8	2	0	1	0	9	2	1	20	9	23	0	34	10	2	15	4	15	11	7	17	39	21	42	0	79	13	13	34	28	35	77	0	88	12	0	91	26	3	80
5	0.1.3.2.11.1	Beutenbergiaceae	4	0	0	0	0	0	0	0	0	0	0	0	0	0	0	0	0	0	0	0	0	0	0	0	0	0	0	0	0	0	0	0	0	0	0	0	0	0	0	0	0	0	0	0	0	0	0
6	0.1.3.2.11.1.1	Beutenbergia	4	0	0	0	0	0	0	0	0	0	0	0	0	0	0	0	0	0	0	0	0	0	0	0	0	0	0	0	0	0	0	0	0	0	0	0	0	0	0	0	0	0	0	0	0	0	0
5	0.1.3.2.11.2	Bogoriellaceae	2	0	0	0	0	0	0	0	0	0	0	0	0	0	0	0	0	0	0	0	0	0	0	0	0	0	0	0	0	0	0	0	0	0	0	0	0	0	0	0	0	0	0	0	0	0	0
6	0.1.3.2.11.2.1	Georgenia	2	0	0	0	0	0	0	0	0	0	0	0	0	0	0	0	0	0	0	0	0	0	0	0	0	0	0	0	0	0	0	0	0	0	0	0	0	0	0	0	0	0	0	0	0	0	0
5	0.1.3.2.11.3	Brevibacteriaceae	35	0	0	0	0	0	0	0	0	0	0	0	0	0	0	0	0	0	0	1	0	0	0	0	0	0	0	0	0	0	1	0	0	0	0	4	0	0	0	0	0	1	0	0	2	0	0
6	0.1.3.2.11.3.1	Brevibacteriaceae_unclassified	2	0	0	0	0	0	0	0	0	0	0	0	0	0	0	0	0	0	0	0	0	0	0	0	0	0	0	0	0	0	0	0	0	0	0	0	0	0	0	0	0	0	0	0	0	0	0
6	0.1.3.2.11.3.2	Brevibacterium	33	0	0	0	0	0	0	0	0	0	0	0	0	0	0	0	0	0	0	1	0	0	0	0	0	0	0	0	0	0	1	0	0	0	0	4	0	0	0	0	0	1	0	0	2	0	0
5	0.1.3.2.11.4	Cellulomonadaceae	133	0	0	0	0	0	0	0	0	0	0	0	0	0	0	0	0	0	0	2	0	0	0	0	0	0	0	0	0	0	0	0	1	1	0	0	0	0	0	0	0	0	0	0	0	0	0
6	0.1.3.2.11.4.1	Actinotalea	2	0	0	0	0	0	0	0	0	0	0	0	0	0	0	0	0	0	0	0	0	0	0	0	0	0	0	0	0	0	0	0	0	0	0	0	0	0	0	0	0	0	0	0	0	0	0
6	0.1.3.2.11.4.2	Cellulomonadaceae_unclassified	11	0	0	0	0	0	0	0	0	0	0	0	0	0	0	0	0	0	0	0	0	0	0	0	0	0	0	0	0	0	0	0	0	0	0	0	0	0	0	0	0	0	0	0	0	0	0
6	0.1.3.2.11.4.3	Cellulomonas	103	0	0	0	0	0	0	0	0	0	0	0	0	0	0	0	0	0	0	2	0	0	0	0	0	0	0	0	0	0	0	0	1	1	0	0	0	0	0	0	0	0	0	0	0	0	0
6	0.1.3.2.11.4.4	Oerskovia	15	0	0	0	0	0	0	0	0	0	0	0	0	0	0	0	0	0	0	0	0	0	0	0	0	0	0	0	0	0	0	0	0	0	0	0	0	0	0	0	0	0	0	0	0	0	0
6	0.1.3.2.11.4.5	Sediminihabitans	2	0	0	0	0	0	0	0	0	0	0	0	0	0	0	0	0	0	0	0	0	0	0	0	0	0	0	0	0	0	0	0	0	0	0	0	0	0	0	0	0	0	0	0	0	0	0
5	0.1.3.2.11.5	Demequinaceae	3	0	0	0	0	0	0	0	0	0	0	0	0	0	0	0	0	0	0	0	0	0	0	0	0	0	0	0	0	0	0	0	0	0	0	0	0	0	0	0	0	0	0	0	0	0	0
6	0.1.3.2.11.5.1	Demequinaceae_unclassified	2	0	0	0	0	0	0	0	0	0	0	0	0	0	0	0	0	0	0	0	0	0	0	0	0	0	0	0	0	0	0	0	0	0	0	0	0	0	0	0	0	0	0	0	0	0	0
6	0.1.3.2.11.5.2	Lysinimicrobium	1	0	0	0	0	0	0	0	0	0	0	0	0	0	0	0	0	0	0	0	0	0	0	0	0	0	0	0	0	0	0	0	0	0	0	0	0	0	0	0	0	0	0	0	0	0	0
5	0.1.3.2.11.6	Dermabacteraceae	13	0	0	0	0	0	0	0	0	0	0	0	0	0	0	0	0	0	0	0	0	0	0	0	0	0	0	0	0	0	0	0	0	0	0	0	2	0	0	0	0	0	0	0	0	0	0
6	0.1.3.2.11.6.1	Brachybacterium	12	0	0	0	0	0	0	0	0	0	0	0	0	0	0	0	0	0	0	0	0	0	0	0	0	0	0	0	0	0	0	0	0	0	0	0	2	0	0	0	0	0	0	0	0	0	0
6	0.1.3.2.11.6.2	Dermabacter	1	0	0	0	0	0	0	0	0	0	0	0	0	0	0	0	0	0	0	0	0	0	0	0	0	0	0	0	0	0	0	0	0	0	0	0	0	0	0	0	0	0	0	0	0	0	0
5	0.1.3.2.11.7	Dermacoccaceae	2	0	0	0	0	0	0	0	0	0	0	0	0	0	0	0	0	0	0	0	0	0	0	0	0	0	0	0	0	0	0	0	0	0	0	0	0	0	0	0	0	0	0	0	0	0	0
6	0.1.3.2.11.7.1	Dermacoccaceae_unclassified	2	0	0	0	0	0	0	0	0	0	0	0	0	0	0	0	0	0	0	0	0	0	0	0	0	0	0	0	0	0	0	0	0	0	0	0	0	0	0	0	0	0	0	0	0	0	0
5	0.1.3.2.11.8	Dermatophilaceae	74	0	0	0	0	0	0	0	0	0	0	0	0	0	0	0	0	0	0	0	0	0	0	0	0	0	0	0	0	0	0	0	0	0	0	0	0	0	2	0	1	0	0	0	0	0	3
6	0.1.3.2.11.8.1	Dermatophilaceae_unclassified	6	0	0	0	0	0	0	0	0	0	0	0	0	0	0	0	0	0	0	0	0	0	0	0	0	0	0	0	0	0	0	0	0	0	0	0	0	0	1	0	1	0	0	0	0	0	0
6	0.1.3.2.11.8.2	Dermatophilus	68	0	0	0	0	0	0	0	0	0	0	0	0	0	0	0	0	0	0	0	0	0	0	0	0	0	0	0	0	0	0	0	0	0	0	0	0	0	1	0	0	0	0	0	0	0	3
5	0.1.3.2.11.9	Intrasporangiaceae	1223	0	0	0	0	0	0	1	0	0	0	0	0	0	0	4	2	0	0	2	0	0	1	0	4	4	2	2	8	1	3	0	4	0	1	2	1	2	4	0	1	0	0	7	0	0	2
6	0.1.3.2.11.9.1	Aquipuribacter	2	0	0	0	0	0	0	0	0	0	0	0	0	0	0	0	0	0	0	0	0	0	0	0	0	0	0	0	0	0	0	0	0	0	0	0	0	0	0	0	0	0	0	0	0	0	0
6	0.1.3.2.11.9.2	Intrasporangiaceae_ge	4	0	0	0	0	0	0	0	0	0	0	0	0	0	0	0	0	0	0	0	0	0	0	0	0	0	0	0	0	0	0	0	0	0	0	0	0	0	0	0	0	0	0	0	0	0	0
6	0.1.3.2.11.9.3	Intrasporangiaceae_unclassified	758	0	0	0	0	0	0	1	0	0	0	0	0	0	0	2	2	0	0	2	0	0	1	0	3	1	1	0	2	0	1	0	0	0	1	1	0	2	4	0	1	0	0	3	0	0	2
6	0.1.3.2.11.9.4	Intrasporangium	93	0	0	0	0	0	0	0	0	0	0	0	0	0	0	0	0	0	0	0	0	0	0	0	0	0	0	0	0	0	0	0	0	0	0	1	0	0	0	0	0	0	0	4	0	0	0
6	0.1.3.2.11.9.5	Janibacter	8	0	0	0	0	0	0	0	0	0	0	0	0	0	0	0	0	0	0	0	0	0	0	0	0	0	0	0	0	0	0	0	0	0	0	0	0	0	0	0	0	0	0	0	0	0	0
6	0.1.3.2.11.9.6	Knoellia	2	0	0	0	0	0	0	0	0	0	0	0	0	0	0	0	0	0	0	0	0	0	0	0	0	0	0	0	0	0	0	0	0	0	0	0	0	0	0	0	0	0	0	0	0	0	0
6	0.1.3.2.11.9.7	Kribbia	1	0	0	0	0	0	0	0	0	0	0	0	0	0	0	0	0	0	0	0	0	0	0	0	0	0	0	0	0	0	0	0	0	0	0	0	0	0	0	0	0	0	0	0	0	0	0
6	0.1.3.2.11.9.8	Lapillicoccus	1	0	0	0	0	0	0	0	0	0	0	0	0	0	0	0	0	0	0	0	0	0	0	0	0	0	0	0	0	0	0	0	0	0	0	0	0	0	0	0	0	0	0	0	0	0	0
6	0.1.3.2.11.9.9	Ornithinibacter	335	0	0	0	0	0	0	0	0	0	0	0	0	0	0	2	0	0	0	0	0	0	0	0	1	3	1	2	6	1	2	0	4	0	0	0	1	0	0	0	0	0	0	0	0	0	0
6	0.1.3.2.11.9.10	Ornithinimicrobium	1	0	0	0	0	0	0	0	0	0	0	0	0	0	0	0	0	0	0	0	0	0	0	0	0	0	0	0	0	0	0	0	0	0	0	0	0	0	0	0	0	0	0	0	0	0	0
6	0.1.3.2.11.9.11	Pedococcus-Phycicoccus	2	0	0	0	0	0	0	0	0	0	0	0	0	0	0	0	0	0	0	0	0	0	0	0	0	0	0	0	0	0	0	0	0	0	0	0	0	0	0	0	0	0	0	0	0	0	0
6	0.1.3.2.11.9.12	Serinicoccus	4	0	0	0	0	0	0	0	0	0	0	0	0	0	0	0	0	0	0	0	0	0	0	0	0	0	0	0	0	0	0	0	0	0	0	0	0	0	0	0	0	0	0	0	0	0	0
6	0.1.3.2.11.9.13	Tetrasphaera	1	0	0	0	0	0	0	0	0	0	0	0	0	0	0	0	0	0	0	0	0	0	0	0	0	0	0	0	0	0	0	0	0	0	0	0	0	0	0	0	0	0	0	0	0	0	0
6	0.1.3.2.11.9.14	uncultured	11	0	0	0	0	0	0	0	0	0	0	0	0	0	0	0	0	0	0	0	0	0	0	0	0	0	0	0	0	0	0	0	0	0	0	0	0	0	0	0	0	0	0	0	0	0	0
5	0.1.3.2.11.10	Microbacteriaceae	10620	1	0	0	0	0	6	0	0	0	0	0	6	0	0	4	5	11	0	13	2	0	1	0	4	3	3	6	11	12	18	0	32	4	4	17	10	19	33	0	46	6	0	45	8	2	25
6	0.1.3.2.11.10.1	Agrococcus	1	0	0	0	0	0	0	0	0	0	0	0	0	0	0	0	0	0	0	0	0	0	0	0	0	0	0	0	0	0	0	0	0	0	0	0	0	0	0	0	0	0	0	0	0	0	0
6	0.1.3.2.11.10.2	Agromyces	3481	0	0	0	0	0	2	0	0	0	0	0	0	0	0	0	1	2	0	1	1	0	0	0	1	1	3	2	3	0	3	0	11	3	0	4	1	4	5	0	25	5	0	4	2	0	11
6	0.1.3.2.11.10.3	Amnibacterium	11	0	0	0	0	0	0	0	0	0	0	0	0	0	0	0	0	0	0	0	0	0	0	0	0	0	0	0	0	0	2	0	0	0	0	1	0	0	0	0	0	0	0	0	0	0	0
6	0.1.3.2.11.10.4	Candidatus_Planktoluna	1	0	0	0	0	0	0	0	0	0	0	0	0	0	0	0	0	0	0	0	0	0	0	0	0	0	0	0	0	0	0	0	0	0	0	0	0	0	0	0	0	0	0	0	0	0	0
6	0.1.3.2.11.10.5	Clavibacter	1	0	0	0	0	0	0	0	0	0	0	0	0	0	0	0	0	0	0	0	0	0	0	0	0	0	0	0	0	0	0	0	0	0	0	0	0	0	0	0	0	0	0	0	0	0	0
6	0.1.3.2.11.10.6	Cnuibacter	5	0	0	0	0	0	0	0	0	0	0	0	0	0	0	0	0	0	0	0	0	0	0	0	0	0	0	0	0	0	0	0	0	0	0	0	0	0	0	0	0	0	0	0	0	0	0
6	0.1.3.2.11.10.7	Cryocola	2	0	0	0	0	0	0	0	0	0	0	0	0	0	0	0	0	0	0	0	0	0	0	0	0	0	0	0	0	0	0	0	1	0	0	0	0	0	0	0	0	0	0	0	0	0	0
6	0.1.3.2.11.10.8	Curtobacterium	12	0	0	0	0	0	0	0	0	0	0	0	0	0	0	0	0	2	0	0	0	0	0	0	0	1	0	0	0	0	2	0	0	0	0	0	5	0	0	0	0	0	0	0	0	0	0
6	0.1.3.2.11.10.9	Diaminobutyricibacter	2	0	0	0	0	0	0	0	0	0	0	0	0	0	0	0	0	0	0	0	0	0	0	0	0	0	0	0	0	0	0	0	0	0	0	0	0	0	0	0	0	0	0	0	0	0	0
6	0.1.3.2.11.10.10	Frigoribacterium	2	0	0	0	0	0	0	0	0	0	0	0	0	0	0	0	0	0	0	0	0	0	0	0	0	0	0	0	0	0	0	0	0	0	0	0	0	0	0	0	0	0	0	0	0	0	0
6	0.1.3.2.11.10.11	Frondihabitans	8	0	0	0	0	0	0	0	0	0	0	0	0	0	0	0	0	0	0	0	0	0	0	0	0	0	0	0	0	0	0	0	0	0	0	0	0	0	0	0	0	0	0	0	0	0	0
6	0.1.3.2.11.10.12	Galbitalea	1	0	0	0	0	0	0	0	0	0	0	0	0	0	0	0	0	0	0	0	0	0	0	0	0	0	0	0	0	0	1	0	0	0	0	0	0	0	0	0	0	0	0	0	0	0	0
6	0.1.3.2.11.10.13	Glaciibacter	1	0	0	0	0	0	0	0	0	0	0	0	0	0	0	0	0	0	0	0	0	0	0	0	0	0	0	0	0	0	0	0	0	0	0	0	0	0	0	0	0	0	0	0	0	0	0
6	0.1.3.2.11.10.14	Glaciihabitans	3	0	0	0	0	0	0	0	0	0	0	0	0	0	0	0	0	0	0	0	0	0	0	0	0	0	0	0	0	0	0	0	0	0	0	0	0	0	0	0	0	0	0	0	0	0	0
6	0.1.3.2.11.10.15	Homoserinimonas	1	0	0	0	0	0	0	0	0	0	0	0	0	0	0	0	0	0	0	0	0	0	0	0	0	0	0	0	0	0	0	0	0	0	0	0	0	0	0	0	0	0	0	0	0	0	0
6	0.1.3.2.11.10.16	Humibacter	1	0	0	0	0	0	0	0	0	0	0	0	0	0	0	0	0	0	0	0	0	0	0	0	0	0	0	0	0	0	0	0	0	0	0	0	0	0	0	0	0	0	0	0	0	0	0
6	0.1.3.2.11.10.17	Leifsonia	3	0	0	0	0	0	0	0	0	0	0	0	0	0	0	0	0	0	0	0	0	0	0	0	0	0	0	0	0	0	1	0	0	0	0	0	0	0	0	0	0	0	0	0	0	0	0
6	0.1.3.2.11.10.18	Leucobacter	2	0	0	0	0	0	0	0	0	0	0	0	0	0	0	0	0	0	0	0	0	0	0	0	0	0	0	0	0	0	0	0	0	0	0	0	0	0	0	0	0	0	0	0	0	0	0
6	0.1.3.2.11.10.19	Lysinimonas	31	0	0	0	0	0	0	0	0	0	0	0	0	0	0	0	0	0	0	0	0	0	0	0	0	0	0	0	0	0	0	0	0	0	0	0	0	0	0	0	0	0	0	0	0	0	0
6	0.1.3.2.11.10.20	Marisediminicola	1	0	0	0	0	0	0	0	0	0	0	0	0	0	0	0	0	0	0	0	0	0	0	0	0	0	0	0	0	0	0	0	0	0	0	0	0	0	0	0	0	0	0	0	0	0	0
6	0.1.3.2.11.10.21	Microbacteriaceae_unclassified	6876	1	0	0	0	0	4	0	0	0	0	0	6	0	0	4	4	5	0	12	1	0	1	0	3	1	0	4	8	12	9	0	20	1	4	10	4	15	28	0	14	1	0	38	4	2	11
6	0.1.3.2.11.10.22	Microbacterium	148	0	0	0	0	0	0	0	0	0	0	0	0	0	0	0	0	2	0	0	0	0	0	0	0	0	0	0	0	0	0	0	0	0	0	2	0	0	0	0	7	0	0	3	2	0	0
6	0.1.3.2.11.10.23	Microterricola	1	0	0	0	0	0	0	0	0	0	0	0	0	0	0	0	0	0	0	0	0	0	0	0	0	0	0	0	0	0	0	0	0	0	0	0	0	0	0	0	0	0	0	0	0	0	0
6	0.1.3.2.11.10.24	Rhodoluna	4	0	0	0	0	0	0	0	0	0	0	0	0	0	0	0	0	0	0	0	0	0	0	0	0	0	0	0	0	0	0	0	0	0	0	0	0	0	0	0	0	0	0	0	0	0	0
6	0.1.3.2.11.10.25	SV1-3	1	0	0	0	0	0	0	0	0	0	0	0	0	0	0	0	0	0	0	0	0	0	0	0	0	0	0	0	0	0	0	0	0	0	0	0	0	0	0	0	0	0	0	0	0	0	0
6	0.1.3.2.11.10.26	Subtercola	15	0	0	0	0	0	0	0	0	0	0	0	0	0	0	0	0	0	0	0	0	0	0	0	0	0	0	0	0	0	0	0	0	0	0	0	0	0	0	0	0	0	0	0	0	0	3
6	0.1.3.2.11.10.27	uncultured	5	0	0	0	0	0	0	0	0	0	0	0	0	0	0	0	0	0	0	0	0	0	0	0	0	0	0	0	0	0	0	0	0	0	0	0	0	0	0	0	0	0	0	0	0	0	0
5	0.1.3.2.11.11	Micrococcaceae	310	0	0	0	0	0	0	0	0	0	0	0	0	0	0	0	0	1	0	1	0	0	0	0	0	0	0	0	0	0	1	0	0	0	0	0	0	0	1	0	0	3	0	0	1	0	2
6	0.1.3.2.11.11.1	Acaricomes	4	0	0	0	0	0	0	0	0	0	0	0	0	0	0	0	0	0	0	0	0	0	0	0	0	0	0	0	0	0	0	0	0	0	0	0	0	0	0	0	0	0	0	0	0	0	0
6	0.1.3.2.11.11.2	Arthrobacter	16	0	0	0	0	0	0	0	0	0	0	0	0	0	0	0	0	0	0	0	0	0	0	0	0	0	0	0	0	0	0	0	0	0	0	0	0	0	0	0	0	0	0	0	0	0	0
6	0.1.3.2.11.11.3	Enteractinococcus	1	0	0	0	0	0	0	0	0	0	0	0	0	0	0	0	0	0	0	0	0	0	0	0	0	0	0	0	0	0	0	0	0	0	0	0	0	0	0	0	0	0	0	0	0	0	0
6	0.1.3.2.11.11.4	Glutamicibacter	2	0	0	0	0	0	0	0	0	0	0	0	0	0	0	0	0	0	0	0	0	0	0	0	0	0	0	0	0	0	0	0	0	0	0	0	0	0	0	0	0	0	0	0	0	0	0
6	0.1.3.2.11.11.5	Kocuria	6	0	0	0	0	0	0	0	0	0	0	0	0	0	0	0	0	0	0	0	0	0	0	0	0	0	0	0	0	0	0	0	0	0	0	0	0	0	0	0	0	0	0	0	0	0	0
6	0.1.3.2.11.11.6	Micrococcaceae_ge	20	0	0	0	0	0	0	0	0	0	0	0	0	0	0	0	0	0	0	0	0	0	0	0	0	0	0	0	0	0	0	0	0	0	0	0	0	0	0	0	0	0	0	0	0	0	0
6	0.1.3.2.11.11.7	Micrococcaceae_unclassified	112	0	0	0	0	0	0	0	0	0	0	0	0	0	0	0	0	1	0	0	0	0	0	0	0	0	0	0	0	0	1	0	0	0	0	0	0	0	0	0	0	0	0	0	0	0	1
6	0.1.3.2.11.11.8	Micrococcus	53	0	0	0	0	0	0	0	0	0	0	0	0	0	0	0	0	0	0	0	0	0	0	0	0	0	0	0	0	0	0	0	0	0	0	0	0	0	0	0	0	0	0	0	0	0	1
6	0.1.3.2.11.11.9	Neomicrococcus	1	0	0	0	0	0	0	0	0	0	0	0	0	0	0	0	0	0	0	0	0	0	0	0	0	0	0	0	0	0	0	0	0	0	0	0	0	0	0	0	0	0	0	0	0	0	0
6	0.1.3.2.11.11.10	Paenarthrobacter	1	0	0	0	0	0	0	0	0	0	0	0	0	0	0	0	0	0	0	0	0	0	0	0	0	0	0	0	0	0	0	0	0	0	0	0	0	0	0	0	0	0	0	0	0	0	0
6	0.1.3.2.11.11.11	Paeniglutamicibacter	2	0	0	0	0	0	0	0	0	0	0	0	0	0	0	0	0	0	0	0	0	0	0	0	0	0	0	0	0	0	0	0	0	0	0	0	0	0	0	0	0	0	0	0	0	0	0
6	0.1.3.2.11.11.12	Pseudarthrobacter	16	0	0	0	0	0	0	0	0	0	0	0	0	0	0	0	0	0	0	1	0	0	0	0	0	0	0	0	0	0	0	0	0	0	0	0	0	0	1	0	0	0	0	0	0	0	0
6	0.1.3.2.11.11.13	Pseudoglutamicibacter	1	0	0	0	0	0	0	0	0	0	0	0	0	0	0	0	0	0	0	0	0	0	0	0	0	0	0	0	0	0	0	0	0	0	0	0	0	0	0	0	0	0	0	0	0	0	0
6	0.1.3.2.11.11.14	Renibacterium	9	0	0	0	0	0	0	0	0	0	0	0	0	0	0	0	0	0	0	0	0	0	0	0	0	0	0	0	0	0	0	0	0	0	0	0	0	0	0	0	0	3	0	0	1	0	0
6	0.1.3.2.11.11.15	Rothia	63	0	0	0	0	0	0	0	0	0	0	0	0	0	0	0	0	0	0	0	0	0	0	0	0	0	0	0	0	0	0	0	0	0	0	0	0	0	0	0	0	0	0	0	0	0	0
6	0.1.3.2.11.11.16	Tersicoccus	1	0	0	0	0	0	0	0	0	0	0	0	0	0	0	0	0	0	0	0	0	0	0	0	0	0	0	0	0	0	0	0	0	0	0	0	0	0	0	0	0	0	0	0	0	0	0
6	0.1.3.2.11.11.17	Yaniella	2	0	0	0	0	0	0	0	0	0	0	0	0	0	0	0	0	0	0	0	0	0	0	0	0	0	0	0	0	0	0	0	0	0	0	0	0	0	0	0	0	0	0	0	0	0	0
5	0.1.3.2.11.12	Micrococcales_Incertae_Sedis	1	0	0	0	0	0	0	0	0	0	0	0	0	0	0	0	0	0	0	0	0	0	0	0	0	0	0	0	0	0	0	0	0	0	0	0	0	0	0	0	0	0	0	0	0	0	0
6	0.1.3.2.11.12.1	Timonella	1	0	0	0	0	0	0	0	0	0	0	0	0	0	0	0	0	0	0	0	0	0	0	0	0	0	0	0	0	0	0	0	0	0	0	0	0	0	0	0	0	0	0	0	0	0	0
5	0.1.3.2.11.13	Micrococcales_unclassified	15895	0	0	1	1	3	7	7	2	0	1	0	3	2	1	12	2	11	0	15	8	2	13	4	7	4	2	9	19	8	19	0	41	8	8	11	11	14	37	0	40	2	0	39	15	1	48
6	0.1.3.2.11.13.1	Micrococcales_unclassified	15895	0	0	1	1	3	7	7	2	0	1	0	3	2	1	12	2	11	0	15	8	2	13	4	7	4	2	9	19	8	19	0	41	8	8	11	11	14	37	0	40	2	0	39	15	1	48
5	0.1.3.2.11.14	Promicromonosporaceae	42	0	0	0	0	0	0	0	0	0	0	0	0	0	0	0	0	0	0	0	0	0	0	0	0	0	0	0	1	0	0	0	1	0	0	0	1	0	0	0	0	0	0	0	0	0	0
6	0.1.3.2.11.14.1	Cellulosimicrobium	9	0	0	0	0	0	0	0	0	0	0	0	0	0	0	0	0	0	0	0	0	0	0	0	0	0	0	0	0	0	0	0	0	0	0	0	0	0	0	0	0	0	0	0	0	0	0
6	0.1.3.2.11.14.2	Promicromonospora	1	0	0	0	0	0	0	0	0	0	0	0	0	0	0	0	0	0	0	0	0	0	0	0	0	0	0	0	0	0	0	0	0	0	0	0	0	0	0	0	0	0	0	0	0	0	0
6	0.1.3.2.11.14.3	Promicromonosporaceae_unclassified	21	0	0	0	0	0	0	0	0	0	0	0	0	0	0	0	0	0	0	0	0	0	0	0	0	0	0	0	1	0	0	0	0	0	0	0	0	0	0	0	0	0	0	0	0	0	0
6	0.1.3.2.11.14.4	Xylanimicrobium	4	0	0	0	0	0	0	0	0	0	0	0	0	0	0	0	0	0	0	0	0	0	0	0	0	0	0	0	0	0	0	0	0	0	0	0	0	0	0	0	0	0	0	0	0	0	0
6	0.1.3.2.11.14.5	Xylanimonas	7	0	0	0	0	0	0	0	0	0	0	0	0	0	0	0	0	0	0	0	0	0	0	0	0	0	0	0	0	0	0	0	1	0	0	0	1	0	0	0	0	0	0	0	0	0	0
5	0.1.3.2.11.15	Ruaniaceae	1	0	0	0	0	0	0	0	0	0	0	0	0	0	0	0	0	0	0	0	0	0	0	0	0	0	0	0	0	0	0	0	0	0	0	0	1	0	0	0	0	0	0	0	0	0	0
6	0.1.3.2.11.15.1	Ruania	1	0	0	0	0	0	0	0	0	0	0	0	0	0	0	0	0	0	0	0	0	0	0	0	0	0	0	0	0	0	0	0	0	0	0	0	1	0	0	0	0	0	0	0	0	0	0
5	0.1.3.2.11.16	Sanguibacteraceae	4	0	0	0	0	0	0	0	0	0	0	0	0	0	0	0	0	0	0	0	0	0	0	0	0	0	0	0	0	0	0	0	0	0	0	0	2	0	0	0	0	0	0	0	0	0	0
6	0.1.3.2.11.16.1	Sanguibacter-Flavimobilis	4	0	0	0	0	0	0	0	0	0	0	0	0	0	0	0	0	0	0	0	0	0	0	0	0	0	0	0	0	0	0	0	0	0	0	0	2	0	0	0	0	0	0	0	0	0	0
4	0.1.3.2.12	Micromonosporales	47032	0	0	0	1	16	16	12	20	0	2	0	7	6	7	24	6	45	0	61	5	5	9	10	38	17	23	32	47	34	88	0	140	47	33	90	44	76	129	0	145	0	0	123	20	5	108
5	0.1.3.2.12.1	Micromonosporaceae	47032	0	0	0	1	16	16	12	20	0	2	0	7	6	7	24	6	45	0	61	5	5	9	10	38	17	23	32	47	34	88	0	140	47	33	90	44	76	129	0	145	0	0	123	20	5	108
6	0.1.3.2.12.1.1	Actinocatenispora	4	0	0	0	0	0	0	0	0	0	0	0	0	0	0	0	0	0	0	0	0	0	0	0	0	0	0	0	0	0	0	0	0	0	0	0	0	0	0	0	0	0	0	0	0	0	0
6	0.1.3.2.12.1.2	Actinoplanes	244	0	0	0	0	3	0	0	0	0	0	0	0	0	0	0	0	0	0	9	0	0	0	0	0	0	0	0	0	0	0	0	1	0	0	0	0	0	0	0	0	0	0	1	0	0	0
6	0.1.3.2.12.1.3	Allocatelliglobosispora	3	0	0	0	0	0	0	0	0	0	0	0	0	0	0	0	0	0	0	0	0	0	0	0	0	0	0	0	0	0	0	0	0	0	0	0	0	0	0	0	0	0	0	0	0	0	0
6	0.1.3.2.12.1.4	Asanoa	21	0	0	0	0	0	0	0	0	0	0	0	0	0	0	1	0	0	0	0	0	0	0	0	0	0	0	0	0	0	0	0	1	0	0	0	0	0	0	0	0	0	0	0	0	0	0
6	0.1.3.2.12.1.5	Catellatospora	49	0	0	0	0	0	0	0	0	0	0	0	0	0	0	0	0	0	0	0	0	0	0	0	0	0	0	0	0	0	1	0	0	0	0	0	0	0	0	0	0	0	0	0	0	0	3
6	0.1.3.2.12.1.6	Catelliglobosispora	21	0	0	0	0	0	0	0	0	0	0	0	0	0	0	0	0	0	0	0	0	0	0	0	0	0	0	0	0	0	0	0	0	0	0	0	0	0	1	0	0	0	0	0	0	0	0
6	0.1.3.2.12.1.7	Catenuloplanes	15	0	0	0	0	0	0	0	0	0	0	0	0	0	0	0	0	0	0	0	0	0	0	0	0	0	0	0	0	0	0	0	0	0	0	0	0	0	0	0	0	0	0	0	0	0	0
6	0.1.3.2.12.1.8	Couchioplanes	2	0	0	0	0	0	0	0	0	0	0	0	0	0	0	0	0	0	0	0	0	0	0	0	0	0	0	0	0	0	0	0	0	0	0	0	0	0	0	0	0	0	0	0	0	0	0
6	0.1.3.2.12.1.9	Dactylosporangium	1667	0	0	0	0	0	0	0	1	0	0	0	0	1	0	2	1	0	0	3	0	0	1	0	3	0	0	1	2	0	4	0	6	0	0	4	3	1	3	0	0	0	0	0	0	0	0
6	0.1.3.2.12.1.10	Hamadaea	3	0	0	0	0	0	0	0	0	0	0	0	0	0	0	0	0	0	0	0	0	0	0	0	0	0	0	0	0	0	0	0	0	0	0	0	0	0	0	0	0	0	0	0	0	0	0
6	0.1.3.2.12.1.11	Krasilnikovia	5	0	0	0	0	0	0	0	0	0	0	0	0	0	0	0	0	0	0	0	0	0	0	0	0	0	0	0	0	0	0	0	0	0	0	0	0	0	0	0	0	0	0	0	1	0	0
6	0.1.3.2.12.1.12	Longispora	24	0	0	0	0	0	0	0	0	0	0	0	0	0	0	0	0	0	0	0	0	0	0	0	0	0	0	0	0	0	0	0	0	0	0	0	0	0	0	0	0	0	0	0	0	0	0
6	0.1.3.2.12.1.13	Luedemannella	838	0	0	0	0	0	0	0	2	0	0	0	0	0	0	2	0	2	0	1	0	0	0	0	1	0	0	0	4	0	1	0	0	7	0	2	0	2	1	0	7	0	0	0	0	0	0
6	0.1.3.2.12.1.14	Micromonospora	7055	0	0	0	0	3	3	0	1	0	0	0	0	0	1	5	1	2	0	2	0	0	0	0	3	1	0	12	8	8	14	0	37	1	0	21	5	2	0	0	1	0	0	7	1	0	0
6	0.1.3.2.12.1.15	Micromonosporaceae_ge	14	0	0	0	0	0	0	0	0	0	0	0	0	0	0	0	0	0	0	0	0	0	0	0	0	0	0	0	0	0	0	0	0	0	0	0	0	0	0	0	0	0	0	0	0	0	0
6	0.1.3.2.12.1.16	Micromonosporaceae_unclassified	34338	0	0	0	1	7	13	12	11	0	2	0	6	5	6	13	3	38	0	43	5	5	7	10	25	16	16	12	30	26	59	0	87	33	32	54	30	60	107	0	119	0	0	104	18	4	92
6	0.1.3.2.12.1.17	Phytohabitans	51	0	0	0	0	2	0	0	0	0	0	0	0	0	0	0	0	0	0	2	0	0	0	0	0	0	0	0	0	0	1	0	0	0	0	0	0	0	0	0	0	0	0	0	0	0	0
6	0.1.3.2.12.1.18	Phytomonospora	4	0	0	0	0	0	0	0	0	0	0	0	0	0	0	0	0	0	0	0	0	0	0	0	0	0	0	0	0	0	0	0	0	0	0	0	0	0	0	0	0	0	0	0	0	0	0
6	0.1.3.2.12.1.19	Pilimelia	28	0	0	0	0	0	0	0	0	0	0	0	0	0	0	0	0	0	0	0	0	0	0	0	0	0	0	0	0	0	0	0	0	0	0	0	0	0	0	0	0	0	0	0	0	0	0
6	0.1.3.2.12.1.20	Planosporangium	133	0	0	0	0	0	0	0	0	0	0	0	0	0	0	0	0	0	0	0	0	0	0	0	0	0	0	0	0	0	0	0	0	0	0	0	0	6	2	0	9	0	0	0	0	0	2
6	0.1.3.2.12.1.21	Plantactinospora	34	0	0	0	0	0	0	0	0	0	0	0	0	0	0	0	0	0	0	0	0	0	0	0	0	0	0	2	0	0	0	0	0	0	0	1	0	0	0	0	0	0	0	0	0	0	0
6	0.1.3.2.12.1.22	Polymorphospora	17	0	0	0	0	0	0	0	0	0	0	0	0	0	0	0	0	0	0	0	0	0	0	0	0	0	0	0	0	0	0	0	0	0	0	0	0	0	1	0	0	0	0	1	0	0	0
6	0.1.3.2.12.1.23	Pseudosporangium	454	0	0	0	0	0	0	0	0	0	0	0	1	0	0	0	0	0	0	1	0	0	1	0	1	0	0	4	0	0	5	0	1	5	0	6	3	5	12	0	6	0	0	4	0	0	5
6	0.1.3.2.12.1.24	Rhizocola	40	0	0	0	0	0	0	0	0	0	0	0	0	0	0	0	0	0	0	0	0	0	0	0	0	0	0	0	0	0	0	0	0	0	0	0	0	0	0	0	0	0	0	2	0	0	0
6	0.1.3.2.12.1.25	Salinispora	1	0	0	0	0	0	0	0	0	0	0	0	0	0	0	0	0	0	0	0	0	0	0	0	0	0	0	0	0	0	0	0	0	0	0	0	0	0	0	0	0	0	0	0	0	0	0
6	0.1.3.2.12.1.26	Spirilliplanes	83	0	0	0	0	0	0	0	0	0	0	0	0	0	0	0	0	0	0	0	0	0	0	0	0	0	0	0	0	0	0	0	0	0	0	0	0	0	1	0	2	0	0	0	0	0	6
6	0.1.3.2.12.1.27	Stackebrandtia	1	0	0	0	0	0	0	0	0	0	0	0	0	0	0	0	0	0	0	0	0	0	0	0	0	0	0	0	0	0	0	0	0	0	0	0	0	0	0	0	0	0	0	0	0	0	0
6	0.1.3.2.12.1.28	Verrucosispora	261	0	0	0	0	0	0	0	0	0	0	0	0	0	0	0	0	1	0	0	0	0	0	0	0	0	0	0	0	0	0	0	0	0	0	1	0	0	1	0	0	0	0	1	0	1	0
6	0.1.3.2.12.1.29	Virgisporangium	1585	0	0	0	0	1	0	0	5	0	0	0	0	0	0	1	1	2	0	0	0	0	0	0	5	0	7	1	3	0	3	0	7	1	1	1	2	0	0	0	1	0	0	3	0	0	0
6	0.1.3.2.12.1.30	Wangella	5	0	0	0	0	0	0	0	0	0	0	0	0	0	0	0	0	0	0	0	0	0	0	0	0	0	0	0	0	0	0	0	0	0	0	0	0	0	0	0	0	0	0	0	0	0	0
6	0.1.3.2.12.1.31	Xiangella	18	0	0	0	0	0	0	0	0	0	0	0	0	0	0	0	0	0	0	0	0	0	0	0	0	0	0	0	0	0	0	0	0	0	0	0	0	0	0	0	0	0	0	0	0	0	0
6	0.1.3.2.12.1.32	uncultured	14	0	0	0	0	0	0	0	0	0	0	0	0	0	0	0	0	0	0	0	0	0	0	0	0	0	0	0	0	0	0	0	0	0	0	0	1	0	0	0	0	0	0	0	0	0	0
4	0.1.3.2.13	Nitriliruptorales	2	0	0	0	0	0	0	0	0	0	0	0	0	0	0	0	0	0	0	0	0	0	0	0	0	0	0	0	0	0	0	0	0	0	0	0	0	0	0	0	0	0	0	0	0	0	0
5	0.1.3.2.13.1	Nitriliruptoraceae	2	0	0	0	0	0	0	0	0	0	0	0	0	0	0	0	0	0	0	0	0	0	0	0	0	0	0	0	0	0	0	0	0	0	0	0	0	0	0	0	0	0	0	0	0	0	0
6	0.1.3.2.13.1.1	Nitriliruptoraceae_unclassified	2	0	0	0	0	0	0	0	0	0	0	0	0	0	0	0	0	0	0	0	0	0	0	0	0	0	0	0	0	0	0	0	0	0	0	0	0	0	0	0	0	0	0	0	0	0	0
4	0.1.3.2.14	PeM15	204	0	0	0	0	0	0	0	0	0	0	0	0	0	0	0	0	0	0	0	0	0	0	1	0	0	0	0	3	0	0	0	0	1	0	2	2	0	0	0	0	0	0	0	0	0	0
5	0.1.3.2.14.1	PeM15_fa	204	0	0	0	0	0	0	0	0	0	0	0	0	0	0	0	0	0	0	0	0	0	0	1	0	0	0	0	3	0	0	0	0	1	0	2	2	0	0	0	0	0	0	0	0	0	0
6	0.1.3.2.14.1.1	PeM15_ge	204	0	0	0	0	0	0	0	0	0	0	0	0	0	0	0	0	0	0	0	0	0	0	1	0	0	0	0	3	0	0	0	0	1	0	2	2	0	0	0	0	0	0	0	0	0	0
4	0.1.3.2.15	Propionibacteriales	63438	0	0	0	1	12	31	15	18	0	2	0	10	9	6	18	9	64	0	80	14	8	23	9	45	17	19	31	101	55	125	0	158	52	24	131	48	72	141	0	147	23	0	137	42	6	125
5	0.1.3.2.15.1	Nocardioidaceae	22766	0	0	0	0	6	12	3	7	0	0	0	2	2	3	2	6	20	0	36	6	4	12	2	22	5	7	15	38	18	52	0	65	25	4	66	22	17	62	0	23	9	0	66	24	0	40
6	0.1.3.2.15.1.1	Aeromicrobium	70	0	0	0	0	0	0	0	0	0	0	0	0	0	0	0	0	0	0	0	0	0	0	0	0	0	0	0	0	0	0	0	0	0	0	0	0	0	2	0	0	0	0	0	0	0	0
6	0.1.3.2.15.1.2	Kribbella	3257	0	0	0	0	2	1	1	1	0	0	0	0	0	0	1	1	0	0	2	3	1	3	0	6	0	4	2	4	0	12	0	2	4	0	21	4	0	9	0	5	7	0	12	2	0	2
6	0.1.3.2.15.1.3	Marmoricola	7944	0	0	0	0	0	7	1	4	0	0	0	0	0	1	1	2	11	0	2	1	0	0	2	6	2	1	6	7	4	15	0	21	8	3	17	5	4	7	0	6	0	0	17	15	0	8
6	0.1.3.2.15.1.4	Mumia	13	0	0	0	0	0	0	0	0	0	0	0	0	0	0	0	0	0	0	0	0	0	0	0	0	0	0	0	0	0	0	0	0	0	0	0	0	0	6	0	0	0	0	1	0	0	0
6	0.1.3.2.15.1.5	Nocardioidaceae_unclassified	7209	0	0	0	0	3	3	1	1	0	0	0	1	2	1	0	3	7	0	18	1	3	3	0	7	2	1	7	16	7	13	0	21	9	1	14	4	9	28	0	10	0	0	27	4	0	17
6	0.1.3.2.15.1.6	Nocardioides	4269	0	0	0	0	1	1	0	1	0	0	0	1	0	1	0	0	2	0	14	1	0	6	0	3	1	1	0	11	7	12	0	21	4	0	14	9	4	10	0	2	2	0	9	3	0	13
6	0.1.3.2.15.1.7	Tenggerimyces	1	0	0	0	0	0	0	0	0	0	0	0	0	0	0	0	0	0	0	0	0	0	0	0	0	0	0	0	0	0	0	0	0	0	0	0	0	0	0	0	0	0	0	0	0	0	0
6	0.1.3.2.15.1.8	uncultured	3	0	0	0	0	0	0	0	0	0	0	0	0	0	0	0	0	0	0	0	0	0	0	0	0	0	0	0	0	0	0	0	0	0	0	0	0	0	0	0	0	0	0	0	0	0	0
5	0.1.3.2.15.2	Propionibacteriaceae	28453	0	0	0	1	6	16	7	10	0	2	0	7	6	3	14	1	31	0	28	6	4	9	6	21	12	8	13	50	28	55	0	67	22	16	48	18	35	46	0	76	4	0	63	13	6	70
6	0.1.3.2.15.2.1	Acidipropionibacterium	61	0	0	0	0	0	0	0	0	0	0	0	0	0	0	0	0	0	0	0	0	0	0	0	0	0	0	0	0	0	0	0	0	0	0	0	0	0	0	0	0	0	0	1	0	0	0
6	0.1.3.2.15.2.2	Auraticoccus	7	0	0	0	0	0	0	0	0	0	0	0	0	0	0	0	0	0	0	0	0	0	0	0	0	0	0	0	0	0	0	0	0	0	0	0	0	0	0	0	0	0	0	0	0	0	0
6	0.1.3.2.15.2.3	Cutibacterium	6402	0	0	0	0	1	0	4	2	0	0	0	0	0	1	1	0	6	0	3	1	1	0	3	4	2	1	1	7	7	18	0	21	12	7	8	3	12	11	0	12	3	0	19	2	0	26
6	0.1.3.2.15.2.4	Friedmanniella	284	0	0	0	0	0	0	0	0	0	0	0	0	0	0	0	0	0	0	1	0	1	0	0	1	0	0	1	0	0	0	0	0	0	0	0	1	2	0	0	2	0	0	9	0	2	0
6	0.1.3.2.15.2.5	Haloactinopolyspora	5	0	0	0	0	0	0	0	0	0	0	0	0	0	0	0	0	0	0	0	0	0	0	0	0	0	0	0	0	0	0	0	0	0	0	0	0	0	0	0	0	0	0	0	0	0	0
6	0.1.3.2.15.2.6	Jiangella	2	0	0	0	0	0	0	0	0	0	0	0	0	0	0	0	0	0	0	0	0	0	0	0	0	0	0	0	0	0	0	0	0	0	0	0	0	0	0	0	0	0	0	0	0	0	0
6	0.1.3.2.15.2.7	Marinilutecoccus	2	0	0	0	0	0	0	0	0	0	0	0	0	0	0	0	0	0	0	0	0	0	0	0	0	0	0	0	0	0	0	0	0	0	0	0	0	0	0	0	0	0	0	0	0	0	0
6	0.1.3.2.15.2.8	Microlunatus	5950	0	0	0	0	0	1	0	2	0	0	0	2	1	0	6	0	4	0	2	2	0	0	0	0	2	0	0	7	1	1	0	12	2	1	8	2	7	7	0	8	0	0	2	0	0	9
6	0.1.3.2.15.2.9	Naumannella	560	0	0	0	0	1	0	0	0	0	0	0	0	1	0	0	0	2	0	1	1	2	1	0	0	1	0	1	3	3	8	0	10	0	4	1	4	0	4	0	1	0	0	1	0	0	0
6	0.1.3.2.15.2.10	Propionibacteriaceae_ge	6	0	0	0	0	0	0	0	0	0	0	0	0	0	0	0	0	0	0	0	0	0	0	0	0	0	0	0	0	0	0	0	0	0	0	0	0	0	0	0	0	0	0	0	0	0	0
6	0.1.3.2.15.2.11	Propionibacteriaceae_unclassified	15146	0	0	0	1	4	15	3	6	0	2	0	5	4	2	7	1	19	0	21	2	0	8	3	16	7	7	10	33	17	28	0	24	8	4	31	8	14	24	0	53	1	0	31	10	3	35
6	0.1.3.2.15.2.12	Propionicicella	3	0	0	0	0	0	0	0	0	0	0	0	0	0	0	0	0	0	0	0	0	0	0	0	0	0	0	0	0	0	0	0	0	0	0	0	0	0	0	0	0	0	0	0	0	1	0
6	0.1.3.2.15.2.13	Propioniciclava	2	0	0	0	0	0	0	0	0	0	0	0	0	0	0	0	0	0	0	0	0	0	0	0	0	0	0	0	0	0	0	0	0	0	0	0	0	0	0	0	0	0	0	0	0	0	0
6	0.1.3.2.15.2.14	Propioniferax	3	0	0	0	0	0	0	0	0	0	0	0	0	0	0	0	0	0	0	0	0	0	0	0	0	0	0	0	0	0	0	0	0	0	0	0	0	0	0	0	0	0	0	0	0	0	0
6	0.1.3.2.15.2.15	Pseudopropionibacterium	6	0	0	0	0	0	0	0	0	0	0	0	0	0	0	0	0	0	0	0	0	0	0	0	0	0	0	0	0	0	0	0	0	0	0	0	0	0	0	0	0	0	0	0	1	0	0
6	0.1.3.2.15.2.16	Raineyella	7	0	0	0	0	0	0	0	0	0	0	0	0	0	0	0	0	0	0	0	0	0	0	0	0	0	0	0	0	0	0	0	0	0	0	0	0	0	0	0	0	0	0	0	0	0	0
6	0.1.3.2.15.2.17	Tessaracoccus	2	0	0	0	0	0	0	0	0	0	0	0	0	0	0	0	0	0	0	0	0	0	0	0	0	0	0	0	0	0	0	0	0	0	0	0	0	0	0	0	0	0	0	0	0	0	0
6	0.1.3.2.15.2.18	uncultured	5	0	0	0	0	0	0	0	0	0	0	0	0	0	0	0	0	0	0	0	0	0	0	0	0	0	0	0	0	0	0	0	0	0	0	0	0	0	0	0	0	0	0	0	0	0	0
5	0.1.3.2.15.3	Propionibacteriales_unclassified	12219	0	0	0	0	0	3	5	1	0	0	0	1	1	0	2	2	13	0	16	2	0	2	1	2	0	4	3	13	9	18	0	26	5	4	17	8	20	33	0	48	10	0	8	5	0	15
6	0.1.3.2.15.3.1	Propionibacteriales_unclassified	12219	0	0	0	0	0	3	5	1	0	0	0	1	1	0	2	2	13	0	16	2	0	2	1	2	0	4	3	13	9	18	0	26	5	4	17	8	20	33	0	48	10	0	8	5	0	15
4	0.1.3.2.16	Pseudonocardiales	50805	0	0	1	1	8	18	7	14	0	0	0	11	3	7	27	24	54	0	80	9	3	17	1	66	16	7	35	83	28	93	0	147	23	25	120	37	116	109	0	108	2	0	118	38	5	157
5	0.1.3.2.16.1	Pseudonocardiaceae	50805	0	0	1	1	8	18	7	14	0	0	0	11	3	7	27	24	54	0	80	9	3	17	1	66	16	7	35	83	28	93	0	147	23	25	120	37	116	109	0	108	2	0	118	38	5	157
6	0.1.3.2.16.1.1	Actinoalloteichus	2	0	0	0	0	0	0	0	0	0	0	0	0	0	0	0	0	0	0	0	0	0	0	0	0	0	0	0	0	0	0	0	0	0	0	0	0	0	0	0	0	0	0	0	0	0	0
6	0.1.3.2.16.1.2	Actinomycetospora	3170	0	0	0	0	1	0	2	2	0	0	0	5	0	1	7	1	2	0	4	0	0	3	0	6	3	3	0	6	0	10	0	15	3	0	9	2	4	19	0	1	0	0	3	3	0	11
6	0.1.3.2.16.1.3	Actinorectispora	2	0	0	0	0	0	0	0	0	0	0	0	0	0	0	0	0	0	0	0	0	0	0	0	0	0	0	0	0	0	0	0	0	0	0	0	0	0	0	0	0	0	0	0	0	0	0
6	0.1.3.2.16.1.4	Actinosynnema	250	0	0	0	0	1	0	0	0	0	0	0	0	0	0	0	0	0	0	0	0	0	0	0	0	0	0	0	0	0	4	0	2	0	0	0	0	0	3	0	0	0	0	0	0	0	0
6	0.1.3.2.16.1.5	Alloactinosynnema	16	0	0	0	0	0	0	0	0	0	0	0	0	0	0	0	0	0	0	0	0	0	0	0	0	0	0	0	0	0	0	0	0	0	0	0	0	0	1	0	1	0	0	0	0	0	1
6	0.1.3.2.16.1.6	Allokutzneria	1	0	0	0	0	0	0	0	0	0	0	0	0	0	0	0	0	0	0	0	0	0	0	0	0	0	0	0	0	0	0	0	0	0	0	0	0	0	0	0	0	0	0	0	0	0	0
6	0.1.3.2.16.1.7	Amycolatopsis	8	0	0	0	0	0	0	0	0	0	0	0	0	0	0	0	0	0	0	0	0	0	0	0	0	0	0	0	0	0	0	0	0	0	0	0	0	0	0	0	0	0	0	1	0	0	0
6	0.1.3.2.16.1.8	Crossiella	68	0	0	0	0	0	0	0	0	0	0	0	0	0	0	0	0	0	0	0	0	0	0	0	0	0	0	0	0	0	0	0	0	0	0	0	0	0	0	0	0	0	0	0	0	0	0
6	0.1.3.2.16.1.9	Goodfellowiella	1	0	0	0	0	0	0	0	0	0	0	0	0	0	0	0	0	0	0	0	0	0	0	0	0	0	0	0	0	0	0	0	0	0	0	0	0	0	0	0	0	0	0	0	0	0	0
6	0.1.3.2.16.1.10	Kibdelosporangium	4	0	0	0	0	0	0	0	0	0	0	0	0	0	0	0	0	0	0	0	0	0	0	0	0	0	0	0	0	0	0	0	0	0	0	0	0	0	0	0	0	0	0	0	0	0	0
6	0.1.3.2.16.1.11	Kutzneria	2427	0	0	0	0	0	0	0	1	0	0	0	0	0	0	2	0	1	0	1	1	0	0	0	2	0	0	0	2	1	1	0	6	0	2	0	1	7	2	0	3	0	0	19	3	1	12
6	0.1.3.2.16.1.12	Lechevalieria	2275	0	0	0	0	0	3	0	0	0	0	0	0	0	3	2	0	0	0	27	0	0	0	0	3	1	0	4	27	3	3	0	3	0	6	3	2	0	1	0	0	0	0	0	2	0	0
6	0.1.3.2.16.1.13	Prauserella	3	0	0	0	0	0	0	0	0	0	0	0	0	0	0	0	0	0	0	0	0	0	0	0	0	0	0	0	0	0	2	0	0	0	0	0	1	0	0	0	0	0	0	0	0	0	0
6	0.1.3.2.16.1.14	Pseudonocardia	5819	0	0	0	0	0	2	0	1	0	0	0	0	0	0	1	3	8	0	16	0	0	1	0	8	1	0	0	8	7	10	0	14	4	3	5	7	13	6	0	16	0	0	8	0	0	22
6	0.1.3.2.16.1.15	Pseudonocardiaceae_ge	10	0	0	0	0	0	0	0	0	0	0	0	0	1	0	0	1	0	0	0	0	0	0	0	0	0	0	0	0	0	0	0	0	0	0	0	0	0	0	0	0	0	0	0	0	0	0
6	0.1.3.2.16.1.16	Pseudonocardiaceae_unclassified	35721	0	0	1	1	6	13	4	10	0	0	0	5	2	3	15	18	43	0	32	8	3	12	1	47	11	4	31	40	16	56	0	105	16	13	99	23	92	77	0	87	0	0	87	29	4	103
6	0.1.3.2.16.1.17	Saccharopolyspora	7	0	0	0	0	0	0	0	0	0	0	0	0	0	0	0	0	0	0	0	0	0	1	0	0	0	0	0	0	0	0	0	0	0	1	0	1	0	0	0	0	2	0	0	0	0	0
6	0.1.3.2.16.1.18	Saccharothrix	26	0	0	0	0	0	0	0	0	0	0	0	0	0	0	0	0	0	0	0	0	0	0	0	0	0	0	0	0	0	0	0	0	0	0	0	0	0	0	0	0	0	0	0	0	0	1
6	0.1.3.2.16.1.19	Streptoalloteichus	7	0	0	0	0	0	0	0	0	0	0	0	0	0	0	0	0	0	0	0	0	0	0	0	0	0	0	0	0	0	0	0	0	0	0	0	0	0	0	0	0	0	0	0	0	0	0
6	0.1.3.2.16.1.20	Tamaricihabitans	1	0	0	0	0	0	0	0	0	0	0	0	0	0	0	0	0	0	0	0	0	0	0	0	0	0	0	0	0	0	0	0	0	0	0	0	0	0	0	0	0	0	0	0	0	0	0
6	0.1.3.2.16.1.21	Thermocrispum	980	0	0	0	0	0	0	1	0	0	0	0	1	0	0	0	1	0	0	0	0	0	0	0	0	0	0	0	0	1	7	0	2	0	0	4	0	0	0	0	0	0	0	0	1	0	7
6	0.1.3.2.16.1.22	Umezawaea	5	0	0	0	0	0	0	0	0	0	0	0	0	0	0	0	0	0	0	0	0	0	0	0	0	0	0	0	0	0	0	0	0	0	0	0	0	0	0	0	0	0	0	0	0	0	0
6	0.1.3.2.16.1.23	Yuhushiella	1	0	0	0	0	0	0	0	0	0	0	0	0	0	0	0	0	0	0	0	0	0	0	0	0	0	0	0	0	0	0	0	0	0	0	0	0	0	0	0	0	0	0	0	0	0	0
6	0.1.3.2.16.1.24	uncultured	1	0	0	0	0	0	0	0	0	0	0	0	0	0	0	0	0	0	0	0	0	0	0	0	0	0	0	0	0	0	0	0	0	0	0	0	0	0	0	0	0	0	0	0	0	0	0
4	0.1.3.2.17	Streptomycetales	3900	0	0	0	0	1	2	0	4	0	1	0	1	3	2	1	1	1	0	4	1	0	0	0	1	0	0	3	5	2	6	0	7	6	7	11	3	9	4	0	14	0	0	27	6	0	20
5	0.1.3.2.17.1	Streptomycetaceae	3900	0	0	0	0	1	2	0	4	0	1	0	1	3	2	1	1	1	0	4	1	0	0	0	1	0	0	3	5	2	6	0	7	6	7	11	3	9	4	0	14	0	0	27	6	0	20
6	0.1.3.2.17.1.1	Allostreptomyces	8	0	0	0	0	0	0	0	0	0	0	0	0	0	0	0	0	0	0	0	0	0	0	0	0	0	0	0	0	0	0	0	0	0	0	0	0	0	0	0	0	0	0	0	0	0	0
6	0.1.3.2.17.1.2	E1B-B3-114	3	0	0	0	0	0	0	0	0	0	0	0	0	0	0	0	0	0	0	0	0	0	0	0	0	0	0	0	0	0	0	0	0	0	0	0	0	0	0	0	0	0	0	0	0	0	3
6	0.1.3.2.17.1.3	Kitasatospora	796	0	0	0	0	0	0	0	0	0	0	0	0	0	0	0	0	0	0	0	0	0	0	0	1	0	0	0	0	0	0	0	0	0	0	0	0	6	0	0	1	0	0	7	0	0	0
6	0.1.3.2.17.1.4	Streptacidiphilus	39	0	0	0	0	0	0	0	0	0	0	0	0	0	0	0	0	0	0	0	0	0	0	0	0	0	0	0	0	0	0	0	0	0	1	0	0	0	0	0	0	0	0	1	0	0	1
6	0.1.3.2.17.1.5	Streptomyces	1850	0	0	0	0	0	1	0	4	0	0	0	0	3	2	1	1	1	0	4	0	0	0	0	0	0	0	2	5	2	5	0	1	6	4	5	3	1	0	0	5	0	0	9	2	0	3
6	0.1.3.2.17.1.6	Streptomycetaceae_ge	59	0	0	0	0	0	0	0	0	0	0	0	0	0	0	0	0	0	0	0	0	0	0	0	0	0	0	0	0	0	0	0	0	0	0	0	0	0	0	0	1	0	0	5	1	0	7
6	0.1.3.2.17.1.7	Streptomycetaceae_unclassified	1145	0	0	0	0	1	1	0	0	0	1	0	1	0	0	0	0	0	0	0	1	0	0	0	0	0	0	1	0	0	1	0	6	0	2	6	0	2	4	0	7	0	0	5	3	0	6
4	0.1.3.2.18	Streptosporangiales	566	0	0	0	0	0	0	0	0	0	0	0	0	0	0	0	0	2	0	3	1	0	2	0	0	0	0	0	2	1	2	0	5	0	0	0	2	0	4	0	0	1	0	3	2	0	0
5	0.1.3.2.18.1	Nocardiopsaceae	13	0	0	0	0	0	0	0	0	0	0	0	0	0	0	0	0	0	0	0	0	0	0	0	0	0	0	0	0	0	0	0	0	0	0	0	0	0	0	0	0	0	0	0	0	0	0
6	0.1.3.2.18.1.1	Nocardiopsaceae_ge	1	0	0	0	0	0	0	0	0	0	0	0	0	0	0	0	0	0	0	0	0	0	0	0	0	0	0	0	0	0	0	0	0	0	0	0	0	0	0	0	0	0	0	0	0	0	0
6	0.1.3.2.18.1.2	Nocardiopsaceae_unclassified	5	0	0	0	0	0	0	0	0	0	0	0	0	0	0	0	0	0	0	0	0	0	0	0	0	0	0	0	0	0	0	0	0	0	0	0	0	0	0	0	0	0	0	0	0	0	0
6	0.1.3.2.18.1.3	Nocardiopsis	7	0	0	0	0	0	0	0	0	0	0	0	0	0	0	0	0	0	0	0	0	0	0	0	0	0	0	0	0	0	0	0	0	0	0	0	0	0	0	0	0	0	0	0	0	0	0
5	0.1.3.2.18.2	Streptosporangiaceae	463	0	0	0	0	0	0	0	0	0	0	0	0	0	0	0	0	0	0	3	1	0	2	0	0	0	0	0	2	1	2	0	5	0	0	0	0	0	3	0	0	0	0	3	0	0	0
6	0.1.3.2.18.2.1	Acrocarpospora	1	0	0	0	0	0	0	0	0	0	0	0	0	0	0	0	0	0	0	0	0	0	0	0	0	0	0	0	0	0	0	0	0	0	0	0	0	0	0	0	0	0	0	0	0	0	0
6	0.1.3.2.18.2.2	Herbidospora	2	0	0	0	0	0	0	0	0	0	0	0	0	0	0	0	0	0	0	0	0	0	0	0	0	0	0	0	0	0	0	0	0	0	0	0	0	0	0	0	0	0	0	0	0	0	0
6	0.1.3.2.18.2.3	Microbispora	10	0	0	0	0	0	0	0	0	0	0	0	0	0	0	0	0	0	0	0	0	0	0	0	0	0	0	0	0	0	0	0	0	0	0	0	0	0	0	0	0	0	0	0	0	0	0
6	0.1.3.2.18.2.4	Microtetraspora	5	0	0	0	0	0	0	0	0	0	0	0	0	0	0	0	0	0	0	0	0	0	0	0	0	0	0	0	0	0	0	0	0	0	0	0	0	0	0	0	0	0	0	0	0	0	0
6	0.1.3.2.18.2.5	Nonomuraea	8	0	0	0	0	0	0	0	0	0	0	0	0	0	0	0	0	0	0	0	0	0	0	0	0	0	0	0	0	0	0	0	0	0	0	0	0	0	0	0	0	0	0	0	0	0	0
6	0.1.3.2.18.2.6	Planotetraspora	3	0	0	0	0	0	0	0	0	0	0	0	0	0	0	0	0	0	0	0	0	0	0	0	0	0	0	0	0	0	0	0	0	0	0	0	0	0	0	0	0	0	0	0	0	0	0
6	0.1.3.2.18.2.7	Sinosporangium	2	0	0	0	0	0	0	0	0	0	0	0	0	0	0	0	0	0	0	0	0	0	0	0	0	0	0	0	0	0	0	0	0	0	0	0	0	0	0	0	0	0	0	0	0	0	0
6	0.1.3.2.18.2.8	Sphaerimonospora	3	0	0	0	0	0	0	0	0	0	0	0	0	0	0	0	0	0	0	0	0	0	2	0	0	0	0	0	0	0	0	0	0	0	0	0	0	0	0	0	0	0	0	0	0	0	0
6	0.1.3.2.18.2.9	Sphaerisporangium	36	0	0	0	0	0	0	0	0	0	0	0	0	0	0	0	0	0	0	2	0	0	0	0	0	0	0	0	0	0	0	0	2	0	0	0	0	0	0	0	0	0	0	0	0	0	0
6	0.1.3.2.18.2.10	Streptosporangiaceae_ge	6	0	0	0	0	0	0	0	0	0	0	0	0	0	0	0	0	0	0	0	0	0	0	0	0	0	0	0	0	0	0	0	0	0	0	0	0	0	0	0	0	0	0	0	0	0	0
6	0.1.3.2.18.2.11	Streptosporangiaceae_unclassified	186	0	0	0	0	0	0	0	0	0	0	0	0	0	0	0	0	0	0	0	0	0	0	0	0	0	0	0	0	0	1	0	0	0	0	0	0	0	3	0	0	0	0	2	0	0	0
6	0.1.3.2.18.2.12	Streptosporangium	11	0	0	0	0	0	0	0	0	0	0	0	0	0	0	0	0	0	0	0	0	0	0	0	0	0	0	0	0	1	0	0	0	0	0	0	0	0	0	0	0	0	0	0	0	0	0
6	0.1.3.2.18.2.13	Thermocatellispora	1	0	0	0	0	0	0	0	0	0	0	0	0	0	0	0	0	0	0	0	0	0	0	0	0	0	0	0	0	0	0	0	0	0	0	0	0	0	0	0	0	0	0	0	0	0	0
6	0.1.3.2.18.2.14	uncultured	189	0	0	0	0	0	0	0	0	0	0	0	0	0	0	0	0	0	0	1	1	0	0	0	0	0	0	0	2	0	1	0	3	0	0	0	0	0	0	0	0	0	0	1	0	0	0
5	0.1.3.2.18.3	Streptosporangiales_unclassified	51	0	0	0	0	0	0	0	0	0	0	0	0	0	0	0	0	0	0	0	0	0	0	0	0	0	0	0	0	0	0	0	0	0	0	0	0	0	1	0	0	1	0	0	1	0	0
6	0.1.3.2.18.3.1	Streptosporangiales_unclassified	51	0	0	0	0	0	0	0	0	0	0	0	0	0	0	0	0	0	0	0	0	0	0	0	0	0	0	0	0	0	0	0	0	0	0	0	0	0	1	0	0	1	0	0	1	0	0
5	0.1.3.2.18.4	Thermomonosporaceae	39	0	0	0	0	0	0	0	0	0	0	0	0	0	0	0	0	2	0	0	0	0	0	0	0	0	0	0	0	0	0	0	0	0	0	0	2	0	0	0	0	0	0	0	1	0	0
6	0.1.3.2.18.4.1	Actinoallomurus	3	0	0	0	0	0	0	0	0	0	0	0	0	0	0	0	0	0	0	0	0	0	0	0	0	0	0	0	0	0	0	0	0	0	0	0	0	0	0	0	0	0	0	0	0	0	0
6	0.1.3.2.18.4.2	Actinocorallia	5	0	0	0	0	0	0	0	0	0	0	0	0	0	0	0	0	0	0	0	0	0	0	0	0	0	0	0	0	0	0	0	0	0	0	0	0	0	0	0	0	0	0	0	0	0	0
6	0.1.3.2.18.4.3	Actinomadura	2	0	0	0	0	0	0	0	0	0	0	0	0	0	0	0	0	2	0	0	0	0	0	0	0	0	0	0	0	0	0	0	0	0	0	0	0	0	0	0	0	0	0	0	0	0	0
6	0.1.3.2.18.4.4	Thermomonospora	4	0	0	0	0	0	0	0	0	0	0	0	0	0	0	0	0	0	0	0	0	0	0	0	0	0	0	0	0	0	0	0	0	0	0	0	0	0	0	0	0	0	0	0	0	0	0
6	0.1.3.2.18.4.5	Thermomonosporaceae_unclassified	24	0	0	0	0	0	0	0	0	0	0	0	0	0	0	0	0	0	0	0	0	0	0	0	0	0	0	0	0	0	0	0	0	0	0	0	2	0	0	0	0	0	0	0	1	0	0
6	0.1.3.2.18.4.6	uncultured	1	0	0	0	0	0	0	0	0	0	0	0	0	0	0	0	0	0	0	0	0	0	0	0	0	0	0	0	0	0	0	0	0	0	0	0	0	0	0	0	0	0	0	0	0	0	0
4	0.1.3.2.19	uncultured	8	0	0	0	0	0	0	0	0	0	0	0	0	0	0	0	0	0	0	0	0	0	0	0	0	0	0	0	0	0	0	0	0	0	0	0	0	0	0	0	0	0	0	0	0	0	0
5	0.1.3.2.19.1	uncultured_fa	8	0	0	0	0	0	0	0	0	0	0	0	0	0	0	0	0	0	0	0	0	0	0	0	0	0	0	0	0	0	0	0	0	0	0	0	0	0	0	0	0	0	0	0	0	0	0
6	0.1.3.2.19.1.1	uncultured_ge	8	0	0	0	0	0	0	0	0	0	0	0	0	0	0	0	0	0	0	0	0	0	0	0	0	0	0	0	0	0	0	0	0	0	0	0	0	0	0	0	0	0	0	0	0	0	0
3	0.1.3.3	Actinobacteriota_unclassified	31370	3	0	0	0	6	17	6	13	0	3	0	10	4	6	12	10	42	0	30	8	9	16	4	35	20	15	28	44	26	82	0	79	39	15	85	32	69	72	0	95	14	0	122	22	6	75
4	0.1.3.3.1	Actinobacteriota_unclassified	31370	3	0	0	0	6	17	6	13	0	3	0	10	4	6	12	10	42	0	30	8	9	16	4	35	20	15	28	44	26	82	0	79	39	15	85	32	69	72	0	95	14	0	122	22	6	75
5	0.1.3.3.1.1	Actinobacteriota_unclassified	31370	3	0	0	0	6	17	6	13	0	3	0	10	4	6	12	10	42	0	30	8	9	16	4	35	20	15	28	44	26	82	0	79	39	15	85	32	69	72	0	95	14	0	122	22	6	75
6	0.1.3.3.1.1.1	Actinobacteriota_unclassified	31370	3	0	0	0	6	17	6	13	0	3	0	10	4	6	12	10	42	0	30	8	9	16	4	35	20	15	28	44	26	82	0	79	39	15	85	32	69	72	0	95	14	0	122	22	6	75
3	0.1.3.4	Coriobacteriia	2691	9	0	0	0	5	7	9	8	0	4	0	6	2	3	12	12	25	0	121	10	7	7	29	12	11	35	26	46	32	232	0	268	31	24	28	71	0	1	0	3	16	0	2	0	0	4
4	0.1.3.4.1	Coriobacteriales	2691	9	0	0	0	5	7	9	8	0	4	0	6	2	3	12	12	25	0	121	10	7	7	29	12	11	35	26	46	32	232	0	268	31	24	28	71	0	1	0	3	16	0	2	0	0	4
5	0.1.3.4.1.1	Atopobiaceae	1449	6	0	0	0	0	6	2	5	0	1	0	3	1	2	4	5	14	0	67	8	4	5	20	3	7	18	7	20	26	163	0	173	23	15	18	59	0	1	0	3	12	0	1	0	0	3
6	0.1.3.4.1.1.1	Atopobiaceae_ge	209	0	0	0	0	0	0	0	1	0	0	0	1	0	0	0	1	2	0	8	0	0	0	3	0	0	8	0	2	3	20	0	7	2	1	1	10	0	1	0	3	2	0	1	0	0	1
6	0.1.3.4.1.1.2	Atopobiaceae_unclassified	127	0	0	0	0	0	2	0	0	0	0	0	0	0	1	2	1	1	0	11	0	2	0	2	0	1	2	4	1	4	9	0	6	3	0	1	7	0	0	0	0	0	0	0	0	0	0
6	0.1.3.4.1.1.3	Atopobium	334	3	0	0	0	0	2	2	2	0	1	0	0	1	0	1	1	3	0	13	3	2	0	1	0	1	4	3	6	5	13	0	38	6	4	3	9	0	0	0	0	3	0	0	0	0	0
6	0.1.3.4.1.1.4	Coriobacteriaceae_UCG-003	2	0	0	0	0	0	0	0	0	0	0	0	0	0	0	0	0	0	0	1	0	0	0	0	0	0	0	0	0	0	0	0	0	0	0	0	0	0	0	0	0	0	0	0	0	0	0
6	0.1.3.4.1.1.5	Libanicoccus	1	0	0	0	0	0	0	0	0	0	0	0	0	0	0	0	0	0	0	0	0	0	0	0	0	0	0	0	0	0	0	0	0	0	0	0	0	0	0	0	0	0	0	0	0	0	0
6	0.1.3.4.1.1.6	Olsenella	770	3	0	0	0	0	1	0	2	0	0	0	2	0	1	1	1	8	0	34	5	0	5	14	3	5	4	0	11	14	120	0	122	12	10	13	33	0	0	0	0	7	0	0	0	0	2
6	0.1.3.4.1.1.7	uncultured	6	0	0	0	0	0	1	0	0	0	0	0	0	0	0	0	1	0	0	0	0	0	0	0	0	0	0	0	0	0	1	0	0	0	0	0	0	0	0	0	0	0	0	0	0	0	0
5	0.1.3.4.1.2	Coriobacteriaceae	117	0	0	0	0	0	0	0	0	0	0	0	0	0	0	0	0	0	0	3	0	0	0	0	0	0	0	0	0	0	0	0	0	0	0	0	0	0	0	0	0	0	0	1	0	0	0
6	0.1.3.4.1.2.1	Collinsella	106	0	0	0	0	0	0	0	0	0	0	0	0	0	0	0	0	0	0	0	0	0	0	0	0	0	0	0	0	0	0	0	0	0	0	0	0	0	0	0	0	0	0	0	0	0	0
6	0.1.3.4.1.2.2	Coriobacteriaceae_unclassified	10	0	0	0	0	0	0	0	0	0	0	0	0	0	0	0	0	0	0	3	0	0	0	0	0	0	0	0	0	0	0	0	0	0	0	0	0	0	0	0	0	0	0	1	0	0	0
6	0.1.3.4.1.2.3	Enorma	1	0	0	0	0	0	0	0	0	0	0	0	0	0	0	0	0	0	0	0	0	0	0	0	0	0	0	0	0	0	0	0	0	0	0	0	0	0	0	0	0	0	0	0	0	0	0
5	0.1.3.4.1.3	Coriobacteriales_Incertae_Sedis	20	0	0	0	0	0	0	0	0	0	0	0	0	0	0	0	0	1	0	0	0	0	0	0	0	0	0	1	0	0	2	0	1	0	0	0	0	0	0	0	0	0	0	0	0	0	0
6	0.1.3.4.1.3.1	Coriobacteriales_Incertae_Sedis_unclassified	4	0	0	0	0	0	0	0	0	0	0	0	0	0	0	0	0	1	0	0	0	0	0	0	0	0	0	0	0	0	0	0	0	0	0	0	0	0	0	0	0	0	0	0	0	0	0
6	0.1.3.4.1.3.2	Raoultibacter	1	0	0	0	0	0	0	0	0	0	0	0	0	0	0	0	0	0	0	0	0	0	0	0	0	0	0	0	0	0	0	0	0	0	0	0	0	0	0	0	0	0	0	0	0	0	0
6	0.1.3.4.1.3.3	uncultured	15	0	0	0	0	0	0	0	0	0	0	0	0	0	0	0	0	0	0	0	0	0	0	0	0	0	0	1	0	0	2	0	1	0	0	0	0	0	0	0	0	0	0	0	0	0	0
5	0.1.3.4.1.4	Coriobacteriales_unclassified	122	0	0	0	0	0	0	3	1	0	1	0	0	0	0	1	1	0	0	6	0	0	1	1	0	0	4	5	2	2	4	0	9	4	0	1	2	0	0	0	0	0	0	0	0	0	0
6	0.1.3.4.1.4.1	Coriobacteriales_unclassified	122	0	0	0	0	0	0	3	1	0	1	0	0	0	0	1	1	0	0	6	0	0	1	1	0	0	4	5	2	2	4	0	9	4	0	1	2	0	0	0	0	0	0	0	0	0	0
5	0.1.3.4.1.5	Eggerthellaceae	900	2	0	0	0	4	1	4	2	0	2	0	3	0	1	6	6	9	0	39	1	3	1	7	8	3	11	11	13	4	56	0	78	3	9	8	7	0	0	0	0	4	0	0	0	0	0
6	0.1.3.4.1.5.1	Adlercreutzia	8	0	0	0	0	0	0	0	0	0	0	0	0	0	0	0	0	0	0	0	0	0	0	0	0	0	0	0	0	0	0	0	0	0	0	0	0	0	0	0	0	1	0	0	0	0	0
6	0.1.3.4.1.5.2	CHKCI002	4	0	0	0	0	0	0	0	0	0	0	0	0	0	0	0	0	0	0	1	0	0	0	0	0	0	1	0	0	0	2	0	0	0	0	0	0	0	0	0	0	0	0	0	0	0	0
6	0.1.3.4.1.5.3	DNF00809	532	2	0	0	0	1	1	4	2	0	0	0	1	0	0	1	2	8	0	23	1	2	1	7	6	0	5	10	8	1	43	0	63	3	6	6	5	0	0	0	0	2	0	0	0	0	0
6	0.1.3.4.1.5.4	Denitrobacterium	13	0	0	0	0	0	0	0	0	0	0	0	0	0	0	0	3	0	0	0	0	0	0	0	0	2	0	0	3	0	0	0	1	0	0	0	0	0	0	0	0	0	0	0	0	0	0
6	0.1.3.4.1.5.5	Eggerthella	1	0	0	0	0	0	0	0	0	0	0	0	0	0	0	0	0	0	0	0	0	0	0	0	0	0	0	0	0	0	0	0	0	0	0	0	0	0	0	0	0	0	0	0	0	0	0
6	0.1.3.4.1.5.6	Eggerthellaceae_unclassified	232	0	0	0	0	1	0	0	0	0	1	0	0	0	1	5	1	1	0	11	0	0	0	0	2	0	5	1	2	3	9	0	9	0	1	1	2	0	0	0	0	1	0	0	0	0	0
6	0.1.3.4.1.5.7	Enterorhabdus	6	0	0	0	0	0	0	0	0	0	0	0	0	0	0	0	0	0	0	0	0	0	0	0	0	0	0	0	0	0	0	0	0	0	1	0	0	0	0	0	0	0	0	0	0	0	0
6	0.1.3.4.1.5.8	Enteroscipio	3	0	0	0	0	0	0	0	0	0	0	0	0	0	0	0	0	0	0	0	0	0	0	0	0	0	0	0	0	0	0	0	0	0	0	0	0	0	0	0	0	0	0	0	0	0	0
6	0.1.3.4.1.5.9	Parvibacter	46	0	0	0	0	2	0	0	0	0	0	0	0	0	0	0	0	0	0	1	0	1	0	0	0	0	0	0	0	0	0	0	3	0	1	0	0	0	0	0	0	0	0	0	0	0	0
6	0.1.3.4.1.5.10	Senegalimassilia	2	0	0	0	0	0	0	0	0	0	1	0	0	0	0	0	0	0	0	0	0	0	0	0	0	0	0	0	0	0	0	0	0	0	0	0	0	0	0	0	0	0	0	0	0	0	0
6	0.1.3.4.1.5.11	Slackia	51	0	0	0	0	0	0	0	0	0	0	0	2	0	0	0	0	0	0	3	0	0	0	0	0	1	0	0	0	0	2	0	2	0	0	0	0	0	0	0	0	0	0	0	0	0	0
6	0.1.3.4.1.5.12	uncultured	2	0	0	0	0	0	0	0	0	0	0	0	0	0	0	0	0	0	0	0	0	0	0	0	0	0	0	0	0	0	0	0	0	0	0	1	0	0	0	0	0	0	0	0	0	0	0
5	0.1.3.4.1.6	uncultured	83	1	0	0	0	1	0	0	0	0	0	0	0	1	0	1	0	1	0	6	1	0	0	1	1	1	2	2	11	0	7	0	7	1	0	1	3	0	0	0	0	0	0	0	0	0	1
6	0.1.3.4.1.6.1	uncultured_ge	83	1	0	0	0	1	0	0	0	0	0	0	0	1	0	1	0	1	0	6	1	0	0	1	1	1	2	2	11	0	7	0	7	1	0	1	3	0	0	0	0	0	0	0	0	0	1
3	0.1.3.5	MB-A2-108	3482	0	0	0	0	1	0	0	1	0	0	0	3	0	1	3	1	1	0	6	4	1	4	0	1	1	2	2	5	4	3	0	11	3	0	12	5	6	0	0	9	0	0	1	1	1	9
4	0.1.3.5.1	MB-A2-108_or	3482	0	0	0	0	1	0	0	1	0	0	0	3	0	1	3	1	1	0	6	4	1	4	0	1	1	2	2	5	4	3	0	11	3	0	12	5	6	0	0	9	0	0	1	1	1	9
5	0.1.3.5.1.1	MB-A2-108_fa	3482	0	0	0	0	1	0	0	1	0	0	0	3	0	1	3	1	1	0	6	4	1	4	0	1	1	2	2	5	4	3	0	11	3	0	12	5	6	0	0	9	0	0	1	1	1	9
6	0.1.3.5.1.1.1	MB-A2-108_ge	3482	0	0	0	0	1	0	0	1	0	0	0	3	0	1	3	1	1	0	6	4	1	4	0	1	1	2	2	5	4	3	0	11	3	0	12	5	6	0	0	9	0	0	1	1	1	9
3	0.1.3.6	Rubrobacteria	59	0	0	0	0	0	0	0	0	0	0	0	0	0	0	0	0	0	0	0	1	0	0	0	0	0	0	0	0	0	0	0	0	0	0	0	0	0	0	0	0	0	0	1	0	0	0
4	0.1.3.6.1	Rubrobacterales	59	0	0	0	0	0	0	0	0	0	0	0	0	0	0	0	0	0	0	0	1	0	0	0	0	0	0	0	0	0	0	0	0	0	0	0	0	0	0	0	0	0	0	1	0	0	0
5	0.1.3.6.1.1	Rubrobacteriaceae	59	0	0	0	0	0	0	0	0	0	0	0	0	0	0	0	0	0	0	0	1	0	0	0	0	0	0	0	0	0	0	0	0	0	0	0	0	0	0	0	0	0	0	1	0	0	0
6	0.1.3.6.1.1.1	Rubrobacter	59	0	0	0	0	0	0	0	0	0	0	0	0	0	0	0	0	0	0	0	1	0	0	0	0	0	0	0	0	0	0	0	0	0	0	0	0	0	0	0	0	0	0	1	0	0	0
3	0.1.3.7	Thermoleophilia	105784	0	0	3	5	15	47	20	28	0	1	0	9	7	17	38	32	113	0	131	26	9	41	12	66	28	30	60	151	80	193	0	304	82	42	156	85	202	306	0	337	15	0	334	73	26	233
4	0.1.3.7.1	Gaiellales	96780	0	0	3	2	15	46	20	28	0	1	0	9	6	16	29	29	99	0	122	24	9	33	11	58	21	23	55	143	75	175	0	272	75	38	142	79	188	264	0	300	15	0	309	60	23	193
5	0.1.3.7.1.1	Gaiellaceae	49545	0	0	1	1	6	22	11	20	0	0	0	3	3	9	19	12	50	0	57	5	2	14	6	27	11	17	25	44	40	82	0	141	29	19	65	32	97	159	0	152	13	0	146	27	13	105
6	0.1.3.7.1.1.1	Gaiella	49545	0	0	1	1	6	22	11	20	0	0	0	3	3	9	19	12	50	0	57	5	2	14	6	27	11	17	25	44	40	82	0	141	29	19	65	32	97	159	0	152	13	0	146	27	13	105
5	0.1.3.7.1.2	Gaiellales_fa	4222	0	0	0	0	1	1	0	0	0	0	0	2	0	0	1	2	1	0	8	2	0	1	0	0	0	1	2	6	7	12	0	5	1	1	4	0	9	17	0	31	1	0	14	1	0	15
6	0.1.3.7.1.2.1	Gaiellales_ge	4222	0	0	0	0	1	1	0	0	0	0	0	2	0	0	1	2	1	0	8	2	0	1	0	0	0	1	2	6	7	12	0	5	1	1	4	0	9	17	0	31	1	0	14	1	0	15
5	0.1.3.7.1.3	Gaiellales_unclassified	31478	0	0	2	1	7	18	9	7	0	1	0	2	1	5	7	10	34	0	42	14	6	11	4	25	7	2	17	74	19	59	0	89	27	13	36	37	79	62	0	95	0	0	121	22	9	62
6	0.1.3.7.1.3.1	Gaiellales_unclassified	31478	0	0	2	1	7	18	9	7	0	1	0	2	1	5	7	10	34	0	42	14	6	11	4	25	7	2	17	74	19	59	0	89	27	13	36	37	79	62	0	95	0	0	121	22	9	62
5	0.1.3.7.1.4	uncultured	11535	0	0	0	0	1	5	0	1	0	0	0	2	2	2	2	5	14	0	15	3	1	7	1	6	3	3	11	19	9	22	0	37	18	5	37	10	3	26	0	22	1	0	28	10	1	11
6	0.1.3.7.1.4.1	uncultured_ge	11535	0	0	0	0	1	5	0	1	0	0	0	2	2	2	2	5	14	0	15	3	1	7	1	6	3	3	11	19	9	22	0	37	18	5	37	10	3	26	0	22	1	0	28	10	1	11
4	0.1.3.7.2	Solirubrobacterales	6073	0	0	0	3	0	1	0	0	0	0	0	0	1	0	9	3	6	0	6	2	0	5	1	6	6	6	4	8	5	10	0	30	4	3	14	4	6	32	0	26	0	0	20	7	3	18
5	0.1.3.7.2.1	67-14	1843	0	0	0	0	0	0	0	0	0	0	0	0	0	0	4	2	2	0	2	2	0	3	0	2	1	0	2	0	2	3	0	14	1	0	4	1	1	13	0	11	0	0	8	3	0	6
6	0.1.3.7.2.1.1	67-14_ge	1843	0	0	0	0	0	0	0	0	0	0	0	0	0	0	4	2	2	0	2	2	0	3	0	2	1	0	2	0	2	3	0	14	1	0	4	1	1	13	0	11	0	0	8	3	0	6
5	0.1.3.7.2.2	Solirubrobacteraceae	2896	0	0	0	3	0	0	0	0	0	0	0	0	1	0	5	1	4	0	4	0	0	2	1	4	1	4	1	8	3	6	0	6	3	3	8	3	3	12	0	7	0	0	10	4	3	10
6	0.1.3.7.2.2.1	Conexibacter	49	0	0	0	0	0	0	0	0	0	0	0	0	0	0	0	0	0	0	0	0	0	0	0	0	0	0	0	0	0	0	0	0	0	0	0	0	0	0	0	0	0	0	0	0	0	0
6	0.1.3.7.2.2.2	JCM_18997	49	0	0	0	0	0	0	0	0	0	0	0	0	0	0	0	0	1	0	0	0	0	0	0	0	0	0	0	0	0	0	0	0	0	0	0	0	0	0	0	0	0	0	0	0	0	0
6	0.1.3.7.2.2.3	Parviterribacter	24	0	0	0	0	0	0	0	0	0	0	0	0	0	0	0	0	0	0	0	0	0	0	0	1	0	0	0	0	0	0	0	0	0	0	1	0	0	0	0	0	0	0	0	0	0	0
6	0.1.3.7.2.2.4	Patulibacter	4	0	0	0	0	0	0	0	0	0	0	0	0	0	0	0	0	0	0	0	0	0	0	1	0	0	0	0	0	0	0	0	0	0	0	0	0	0	1	0	0	0	0	0	0	0	0
6	0.1.3.7.2.2.5	Solirubrobacter	275	0	0	0	0	0	0	0	0	0	0	0	0	0	0	3	0	0	0	2	0	0	0	0	0	0	1	0	4	1	0	0	3	0	0	2	0	2	0	0	0	0	0	2	0	0	1
6	0.1.3.7.2.2.6	Solirubrobacteraceae_ge	677	0	0	0	0	0	0	0	0	0	0	0	0	1	0	2	1	2	0	0	0	0	0	0	1	1	1	0	0	1	6	0	0	0	0	4	0	1	5	0	3	0	0	4	0	2	3
6	0.1.3.7.2.2.7	Solirubrobacteraceae_unclassified	1815	0	0	0	1	0	0	0	0	0	0	0	0	0	0	0	0	1	0	2	0	0	2	0	2	0	2	1	4	1	0	0	3	3	3	1	3	0	6	0	4	0	0	4	4	1	6
6	0.1.3.7.2.2.8	uncultured	3	0	0	0	2	0	0	0	0	0	0	0	0	0	0	0	0	0	0	0	0	0	0	0	0	0	0	0	0	0	0	0	0	0	0	0	0	0	0	0	0	0	0	0	0	0	0
5	0.1.3.7.2.3	Solirubrobacterales_unclassified	1334	0	0	0	0	0	1	0	0	0	0	0	0	0	0	0	0	0	0	0	0	0	0	0	0	4	2	1	0	0	1	0	10	0	0	2	0	2	7	0	8	0	0	2	0	0	2
6	0.1.3.7.2.3.1	Solirubrobacterales_unclassified	1334	0	0	0	0	0	1	0	0	0	0	0	0	0	0	0	0	0	0	0	0	0	0	0	0	4	2	1	0	0	1	0	10	0	0	2	0	2	7	0	8	0	0	2	0	0	2
4	0.1.3.7.3	Thermoleophilia_unclassified	2715	0	0	0	0	0	0	0	0	0	0	0	0	0	1	0	0	7	0	1	0	0	3	0	2	1	1	1	0	0	5	0	2	3	1	0	2	8	10	0	11	0	0	4	6	0	19
5	0.1.3.7.3.1	Thermoleophilia_unclassified	2715	0	0	0	0	0	0	0	0	0	0	0	0	0	1	0	0	7	0	1	0	0	3	0	2	1	1	1	0	0	5	0	2	3	1	0	2	8	10	0	11	0	0	4	6	0	19
6	0.1.3.7.3.1.1	Thermoleophilia_unclassified	2715	0	0	0	0	0	0	0	0	0	0	0	0	0	1	0	0	7	0	1	0	0	3	0	2	1	1	1	0	0	5	0	2	3	1	0	2	8	10	0	11	0	0	4	6	0	19
4	0.1.3.7.4	Thermophilales	12	0	0	0	0	0	0	0	0	0	0	0	0	0	0	0	0	0	0	0	0	0	0	0	0	0	0	0	0	0	0	0	0	0	0	0	0	0	0	0	0	0	0	1	0	0	2
5	0.1.3.7.4.1	Thermoleophilaceae	12	0	0	0	0	0	0	0	0	0	0	0	0	0	0	0	0	0	0	0	0	0	0	0	0	0	0	0	0	0	0	0	0	0	0	0	0	0	0	0	0	0	0	1	0	0	2
6	0.1.3.7.4.1.1	Thermoleophilum	12	0	0	0	0	0	0	0	0	0	0	0	0	0	0	0	0	0	0	0	0	0	0	0	0	0	0	0	0	0	0	0	0	0	0	0	0	0	0	0	0	0	0	1	0	0	2
4	0.1.3.7.5	uncultured	204	0	0	0	0	0	0	0	0	0	0	0	0	0	0	0	0	1	0	2	0	0	0	0	0	0	0	0	0	0	3	0	0	0	0	0	0	0	0	0	0	0	0	0	0	0	1
5	0.1.3.7.5.1	uncultured_fa	204	0	0	0	0	0	0	0	0	0	0	0	0	0	0	0	0	1	0	2	0	0	0	0	0	0	0	0	0	0	3	0	0	0	0	0	0	0	0	0	0	0	0	0	0	0	1
6	0.1.3.7.5.1.1	uncultured_ge	204	0	0	0	0	0	0	0	0	0	0	0	0	0	0	0	0	1	0	2	0	0	0	0	0	0	0	0	0	0	3	0	0	0	0	0	0	0	0	0	0	0	0	0	0	0	1
2	0.1.4	Armatimonadota	888	0	0	0	0	1	0	1	0	0	0	0	0	1	0	0	0	0	0	2	1	0	1	0	2	0	0	0	0	0	1	0	0	0	0	4	0	0	1	0	3	0	0	1	1	0	5
3	0.1.4.1	Armatimonadia	11	0	0	0	0	0	0	0	0	0	0	0	0	0	0	0	0	0	0	0	0	0	0	0	0	0	0	0	0	0	0	0	0	0	0	0	0	0	0	0	0	0	0	0	0	0	0
4	0.1.4.1.1	Armatimonadales	11	0	0	0	0	0	0	0	0	0	0	0	0	0	0	0	0	0	0	0	0	0	0	0	0	0	0	0	0	0	0	0	0	0	0	0	0	0	0	0	0	0	0	0	0	0	0
5	0.1.4.1.1.1	Armatimonadales_fa	5	0	0	0	0	0	0	0	0	0	0	0	0	0	0	0	0	0	0	0	0	0	0	0	0	0	0	0	0	0	0	0	0	0	0	0	0	0	0	0	0	0	0	0	0	0	0
6	0.1.4.1.1.1.1	Armatimonadales_ge	5	0	0	0	0	0	0	0	0	0	0	0	0	0	0	0	0	0	0	0	0	0	0	0	0	0	0	0	0	0	0	0	0	0	0	0	0	0	0	0	0	0	0	0	0	0	0
5	0.1.4.1.1.2	Armatimonadales_unclassified	6	0	0	0	0	0	0	0	0	0	0	0	0	0	0	0	0	0	0	0	0	0	0	0	0	0	0	0	0	0	0	0	0	0	0	0	0	0	0	0	0	0	0	0	0	0	0
6	0.1.4.1.1.2.1	Armatimonadales_unclassified	6	0	0	0	0	0	0	0	0	0	0	0	0	0	0	0	0	0	0	0	0	0	0	0	0	0	0	0	0	0	0	0	0	0	0	0	0	0	0	0	0	0	0	0	0	0	0
3	0.1.4.2	Armatimonadota_unclassified	6	0	0	0	0	0	0	0	0	0	0	0	0	0	0	0	0	0	0	0	0	0	0	0	0	0	0	0	0	0	0	0	0	0	0	0	0	0	0	0	0	0	0	0	0	0	0
4	0.1.4.2.1	Armatimonadota_unclassified	6	0	0	0	0	0	0	0	0	0	0	0	0	0	0	0	0	0	0	0	0	0	0	0	0	0	0	0	0	0	0	0	0	0	0	0	0	0	0	0	0	0	0	0	0	0	0
5	0.1.4.2.1.1	Armatimonadota_unclassified	6	0	0	0	0	0	0	0	0	0	0	0	0	0	0	0	0	0	0	0	0	0	0	0	0	0	0	0	0	0	0	0	0	0	0	0	0	0	0	0	0	0	0	0	0	0	0
6	0.1.4.2.1.1.1	Armatimonadota_unclassified	6	0	0	0	0	0	0	0	0	0	0	0	0	0	0	0	0	0	0	0	0	0	0	0	0	0	0	0	0	0	0	0	0	0	0	0	0	0	0	0	0	0	0	0	0	0	0
3	0.1.4.3	Chthonomonadetes	714	0	0	0	0	1	0	0	0	0	0	0	0	1	0	0	0	0	0	0	1	0	0	0	0	0	0	0	0	0	1	0	0	0	0	2	0	0	0	0	0	0	0	0	1	0	4
4	0.1.4.3.1	Chthonomonadales	714	0	0	0	0	1	0	0	0	0	0	0	0	1	0	0	0	0	0	0	1	0	0	0	0	0	0	0	0	0	1	0	0	0	0	2	0	0	0	0	0	0	0	0	1	0	4
5	0.1.4.3.1.1	Chthonomonadaceae	63	0	0	0	0	1	0	0	0	0	0	0	0	0	0	0	0	0	0	0	0	0	0	0	0	0	0	0	0	0	0	0	0	0	0	0	0	0	0	0	0	0	0	0	1	0	4
6	0.1.4.3.1.1.1	Chthonomonas	63	0	0	0	0	1	0	0	0	0	0	0	0	0	0	0	0	0	0	0	0	0	0	0	0	0	0	0	0	0	0	0	0	0	0	0	0	0	0	0	0	0	0	0	1	0	4
5	0.1.4.3.1.2	Chthonomonadales_fa	33	0	0	0	0	0	0	0	0	0	0	0	0	0	0	0	0	0	0	0	0	0	0	0	0	0	0	0	0	0	0	0	0	0	0	2	0	0	0	0	0	0	0	0	0	0	0
6	0.1.4.3.1.2.1	Chthonomonadales_ge	33	0	0	0	0	0	0	0	0	0	0	0	0	0	0	0	0	0	0	0	0	0	0	0	0	0	0	0	0	0	0	0	0	0	0	2	0	0	0	0	0	0	0	0	0	0	0
5	0.1.4.3.1.3	Chthonomonadales_unclassified	618	0	0	0	0	0	0	0	0	0	0	0	0	1	0	0	0	0	0	0	1	0	0	0	0	0	0	0	0	0	1	0	0	0	0	0	0	0	0	0	0	0	0	0	0	0	0
6	0.1.4.3.1.3.1	Chthonomonadales_unclassified	618	0	0	0	0	0	0	0	0	0	0	0	0	1	0	0	0	0	0	0	1	0	0	0	0	0	0	0	0	0	1	0	0	0	0	0	0	0	0	0	0	0	0	0	0	0	0
3	0.1.4.4	Fimbriimonadia	37	0	0	0	0	0	0	0	0	0	0	0	0	0	0	0	0	0	0	2	0	0	0	0	0	0	0	0	0	0	0	0	0	0	0	1	0	0	1	0	0	0	0	1	0	0	0
4	0.1.4.4.1	Fimbriimonadales	37	0	0	0	0	0	0	0	0	0	0	0	0	0	0	0	0	0	0	2	0	0	0	0	0	0	0	0	0	0	0	0	0	0	0	1	0	0	1	0	0	0	0	1	0	0	0
5	0.1.4.4.1.1	Fimbriimonadaceae	35	0	0	0	0	0	0	0	0	0	0	0	0	0	0	0	0	0	0	2	0	0	0	0	0	0	0	0	0	0	0	0	0	0	0	1	0	0	1	0	0	0	0	1	0	0	0
6	0.1.4.4.1.1.1	Fimbriimonadaceae_ge	29	0	0	0	0	0	0	0	0	0	0	0	0	0	0	0	0	0	0	2	0	0	0	0	0	0	0	0	0	0	0	0	0	0	0	1	0	0	0	0	0	0	0	0	0	0	0
6	0.1.4.4.1.1.2	Fimbriimonadaceae_unclassified	1	0	0	0	0	0	0	0	0	0	0	0	0	0	0	0	0	0	0	0	0	0	0	0	0	0	0	0	0	0	0	0	0	0	0	0	0	0	0	0	0	0	0	0	0	0	0
6	0.1.4.4.1.1.3	Fimbriimonas	5	0	0	0	0	0	0	0	0	0	0	0	0	0	0	0	0	0	0	0	0	0	0	0	0	0	0	0	0	0	0	0	0	0	0	0	0	0	1	0	0	0	0	1	0	0	0
5	0.1.4.4.1.2	Fimbriimonadales_fa	1	0	0	0	0	0	0	0	0	0	0	0	0	0	0	0	0	0	0	0	0	0	0	0	0	0	0	0	0	0	0	0	0	0	0	0	0	0	0	0	0	0	0	0	0	0	0
6	0.1.4.4.1.2.1	Fimbriimonadales_ge	1	0	0	0	0	0	0	0	0	0	0	0	0	0	0	0	0	0	0	0	0	0	0	0	0	0	0	0	0	0	0	0	0	0	0	0	0	0	0	0	0	0	0	0	0	0	0
5	0.1.4.4.1.3	Fimbriimonadales_unclassified	1	0	0	0	0	0	0	0	0	0	0	0	0	0	0	0	0	0	0	0	0	0	0	0	0	0	0	0	0	0	0	0	0	0	0	0	0	0	0	0	0	0	0	0	0	0	0
6	0.1.4.4.1.3.1	Fimbriimonadales_unclassified	1	0	0	0	0	0	0	0	0	0	0	0	0	0	0	0	0	0	0	0	0	0	0	0	0	0	0	0	0	0	0	0	0	0	0	0	0	0	0	0	0	0	0	0	0	0	0
3	0.1.4.5	uncultured	120	0	0	0	0	0	0	1	0	0	0	0	0	0	0	0	0	0	0	0	0	0	1	0	2	0	0	0	0	0	0	0	0	0	0	1	0	0	0	0	3	0	0	0	0	0	1
4	0.1.4.5.1	uncultured_or	120	0	0	0	0	0	0	1	0	0	0	0	0	0	0	0	0	0	0	0	0	0	1	0	2	0	0	0	0	0	0	0	0	0	0	1	0	0	0	0	3	0	0	0	0	0	1
5	0.1.4.5.1.1	uncultured_fa	120	0	0	0	0	0	0	1	0	0	0	0	0	0	0	0	0	0	0	0	0	0	1	0	2	0	0	0	0	0	0	0	0	0	0	1	0	0	0	0	3	0	0	0	0	0	1
6	0.1.4.5.1.1.1	uncultured_ge	120	0	0	0	0	0	0	1	0	0	0	0	0	0	0	0	0	0	0	0	0	0	1	0	2	0	0	0	0	0	0	0	0	0	0	1	0	0	0	0	3	0	0	0	0	0	1
2	0.1.5	Bacteria_ph	2	0	0	0	0	0	0	0	0	0	0	0	0	0	0	0	0	0	0	0	0	0	0	0	0	0	0	0	0	0	0	0	0	0	0	0	0	0	0	0	0	0	0	0	0	0	0
3	0.1.5.1	Bacteria_cl	2	0	0	0	0	0	0	0	0	0	0	0	0	0	0	0	0	0	0	0	0	0	0	0	0	0	0	0	0	0	0	0	0	0	0	0	0	0	0	0	0	0	0	0	0	0	0
4	0.1.5.1.1	Bacteria_or	2	0	0	0	0	0	0	0	0	0	0	0	0	0	0	0	0	0	0	0	0	0	0	0	0	0	0	0	0	0	0	0	0	0	0	0	0	0	0	0	0	0	0	0	0	0	0
5	0.1.5.1.1.1	Bacteria_fa	2	0	0	0	0	0	0	0	0	0	0	0	0	0	0	0	0	0	0	0	0	0	0	0	0	0	0	0	0	0	0	0	0	0	0	0	0	0	0	0	0	0	0	0	0	0	0
6	0.1.5.1.1.1.1	Bacteria_ge	2	0	0	0	0	0	0	0	0	0	0	0	0	0	0	0	0	0	0	0	0	0	0	0	0	0	0	0	0	0	0	0	0	0	0	0	0	0	0	0	0	0	0	0	0	0	0
2	0.1.6	Bacteria_unclassified	345126	214	0	35	26	251	533	213	678	1	362	2	253	187	200	268	344	912	0	831	240	514	321	324	467	497	1101	600	1390	500	1396	0	1244	593	436	612	1052	973	1149	0	1465	95	3	1589	370	80	1223
3	0.1.6.1	Bacteria_unclassified	345126	214	0	35	26	251	533	213	678	1	362	2	253	187	200	268	344	912	0	831	240	514	321	324	467	497	1101	600	1390	500	1396	0	1244	593	436	612	1052	973	1149	0	1465	95	3	1589	370	80	1223
4	0.1.6.1.1	Bacteria_unclassified	345126	214	0	35	26	251	533	213	678	1	362	2	253	187	200	268	344	912	0	831	240	514	321	324	467	497	1101	600	1390	500	1396	0	1244	593	436	612	1052	973	1149	0	1465	95	3	1589	370	80	1223
5	0.1.6.1.1.1	Bacteria_unclassified	345126	214	0	35	26	251	533	213	678	1	362	2	253	187	200	268	344	912	0	831	240	514	321	324	467	497	1101	600	1390	500	1396	0	1244	593	436	612	1052	973	1149	0	1465	95	3	1589	370	80	1223
6	0.1.6.1.1.1.1	Bacteria_unclassified	345126	214	0	35	26	251	533	213	678	1	362	2	253	187	200	268	344	912	0	831	240	514	321	324	467	497	1101	600	1390	500	1396	0	1244	593	436	612	1052	973	1149	0	1465	95	3	1589	370	80	1223
2	0.1.7	Bacteroidota	1993122	26988	4	36	86	16322	12047	21058	45387	8	22067	4	9854	21225	41835	27983	27617	55626	1	21398	12102	15622	31179	19502	27238	18170	9214	10089	24715	29150	52459	9	22138	15577	30532	10847	22475	1098	1430	0	2099	760	2	2029	395	191	1689
3	0.1.7.1	Bacteroidia	1989882	26968	4	36	86	16307	12022	21050	45331	8	22047	4	9848	21211	41827	27971	27608	55555	1	21364	12087	15555	31170	19496	27223	18143	9087	10077	24639	29140	52407	9	22104	15559	30515	10841	22369	1092	1426	0	2091	759	2	2021	395	191	1677
4	0.1.7.1.1	Bacteroidales	1533512	26810	4	17	75	16179	11749	20912	45004	8	21909	4	9585	21085	41610	27704	27285	55006	1	20454	11821	15148	30626	18985	26853	17837	8893	9830	23967	28718	51336	9	20515	14920	29926	10231	21955	256	357	0	424	659	0	683	113	56	673
5	0.1.7.1.1.1	3M1PL1-52_termite_group	1	0	0	0	0	0	0	0	0	0	0	0	0	0	0	0	0	0	0	0	0	0	0	0	0	0	0	0	0	0	0	0	0	0	0	0	0	0	0	0	0	0	0	0	0	0	0
6	0.1.7.1.1.1.1	3M1PL1-52_termite_group_ge	1	0	0	0	0	0	0	0	0	0	0	0	0	0	0	0	0	0	0	0	0	0	0	0	0	0	0	0	0	0	0	0	0	0	0	0	0	0	0	0	0	0	0	0	0	0	0
5	0.1.7.1.1.2	Bacteroidaceae	77837	0	0	0	0	0	0	0	1	0	0	0	1	0	1	2	0	2	0	10	3	0	6	0	2	0	4	1	1	2	21	0	14	10	1	49	0	1	4	0	1	12	0	6	0	3	6
6	0.1.7.1.1.2.1	Bacteroides	77837	0	0	0	0	0	0	0	1	0	0	0	1	0	1	2	0	2	0	10	3	0	6	0	2	0	4	1	1	2	21	0	14	10	1	49	0	1	4	0	1	12	0	6	0	3	6
5	0.1.7.1.1.3	Bacteroidales_BS11_gut_group	44736	403	0	1	0	24	785	226	836	0	307	0	289	2876	92	138	392	1169	0	209	333	562	323	894	1796	979	1110	59	3487	1050	685	0	1023	1983	648	246	1548	7	4	0	3	12	0	9	4	1	3
6	0.1.7.1.1.3.1	Bacteroidales_BS11_gut_group_ge	44736	403	0	1	0	24	785	226	836	0	307	0	289	2876	92	138	392	1169	0	209	333	562	323	894	1796	979	1110	59	3487	1050	685	0	1023	1983	648	246	1548	7	4	0	3	12	0	9	4	1	3
5	0.1.7.1.1.4	Bacteroidales_Incertae_Sedis	1	0	0	0	0	0	0	0	0	0	0	0	0	0	0	0	0	0	0	0	0	0	0	0	0	1	0	0	0	0	0	0	0	0	0	0	0	0	0	0	0	0	0	0	0	0	0
6	0.1.7.1.1.4.1	Phocaeicola	1	0	0	0	0	0	0	0	0	0	0	0	0	0	0	0	0	0	0	0	0	0	0	0	0	1	0	0	0	0	0	0	0	0	0	0	0	0	0	0	0	0	0	0	0	0	0
5	0.1.7.1.1.5	Bacteroidales_RF16_group	30620	85	0	0	3	13	118	582	22	1	164	0	100	167	57	53	161	193	0	285	33	316	1202	178	421	844	41	469	509	172	772	2	3176	15	1190	90	746	6	4	0	2	8	0	7	1	3	8
6	0.1.7.1.1.5.1	Bacteroidales_RF16_group_ge	30620	85	0	0	3	13	118	582	22	1	164	0	100	167	57	53	161	193	0	285	33	316	1202	178	421	844	41	469	509	172	772	2	3176	15	1190	90	746	6	4	0	2	8	0	7	1	3	8
5	0.1.7.1.1.6	Bacteroidales_UCG-001	436	0	0	0	0	1	5	0	5	0	63	0	0	0	1	0	3	64	0	0	9	0	0	0	0	0	0	5	0	1	0	0	7	0	0	0	0	0	0	0	0	0	0	0	0	0	0
6	0.1.7.1.1.6.1	Bacteroidales_UCG-001_ge	436	0	0	0	0	1	5	0	5	0	63	0	0	0	1	0	3	64	0	0	9	0	0	0	0	0	0	5	0	1	0	0	7	0	0	0	0	0	0	0	0	0	0	0	0	0	0
5	0.1.7.1.1.7	Bacteroidales_unclassified	32679	756	1	3	7	139	242	195	374	1	257	1	1114	240	510	283	315	309	0	490	341	260	830	893	384	708	206	135	296	849	650	0	410	251	577	133	236	45	35	0	43	12	0	59	13	3	84
6	0.1.7.1.1.7.1	Bacteroidales_unclassified	32679	756	1	3	7	139	242	195	374	1	257	1	1114	240	510	283	315	309	0	490	341	260	830	893	384	708	206	135	296	849	650	0	410	251	577	133	236	45	35	0	43	12	0	59	13	3	84
5	0.1.7.1.1.8	Bacteroidetes_BD2-2	546	0	0	0	0	4	33	0	7	0	1	0	2	2	15	2	11	79	0	8	48	1	0	4	0	0	10	26	3	1	13	0	0	107	0	20	10	0	0	0	0	1	0	0	0	0	0
6	0.1.7.1.1.8.1	Bacteroidetes_BD2-2_ge	546	0	0	0	0	4	33	0	7	0	1	0	2	2	15	2	11	79	0	8	48	1	0	4	0	0	10	26	3	1	13	0	0	107	0	20	10	0	0	0	0	1	0	0	0	0	0
5	0.1.7.1.1.9	Barnesiellaceae	4029	0	0	0	0	0	1	0	0	0	0	0	0	0	1	3	1	0	0	0	0	0	0	0	9	0	1	0	0	0	5	0	2	1	0	7	1	4	0	0	0	0	0	1	1	0	1
6	0.1.7.1.1.9.1	Barnesiella	7	0	0	0	0	0	0	0	0	0	0	0	0	0	0	0	0	0	0	0	0	0	0	0	0	0	0	0	0	0	0	0	0	0	0	0	0	0	0	0	0	0	0	0	0	0	0
6	0.1.7.1.1.9.2	Barnesiellaceae_unclassified	19	0	0	0	0	0	0	0	0	0	0	0	0	0	0	0	1	0	0	0	0	0	0	0	0	0	0	0	0	0	0	0	0	0	0	0	0	0	0	0	0	0	0	0	1	0	0
6	0.1.7.1.1.9.3	Coprobacter	1	0	0	0	0	0	0	0	0	0	0	0	0	0	0	0	0	0	0	0	0	0	0	0	0	0	0	0	0	0	0	0	0	0	0	0	0	0	0	0	0	0	0	0	0	0	0
6	0.1.7.1.1.9.4	uncultured	4002	0	0	0	0	0	1	0	0	0	0	0	0	0	1	3	0	0	0	0	0	0	0	0	9	0	1	0	0	0	5	0	2	1	0	7	1	4	0	0	0	0	0	1	0	0	1
5	0.1.7.1.1.10	COB_P4-1_termite_group	26	0	0	0	0	0	0	0	0	0	0	0	0	0	0	0	0	3	0	6	1	0	0	0	0	0	0	0	0	0	2	0	0	0	0	8	0	0	0	0	0	0	0	0	0	0	0
6	0.1.7.1.1.10.1	COB_P4-1_termite_group_ge	26	0	0	0	0	0	0	0	0	0	0	0	0	0	0	0	0	3	0	6	1	0	0	0	0	0	0	0	0	0	2	0	0	0	0	8	0	0	0	0	0	0	0	0	0	0	0
5	0.1.7.1.1.11	CR-115	1	0	0	0	0	0	0	0	0	0	0	0	0	0	0	0	0	0	0	0	0	1	0	0	0	0	0	0	0	0	0	0	0	0	0	0	0	0	0	0	0	0	0	0	0	0	0
6	0.1.7.1.1.11.1	CR-115_ge	1	0	0	0	0	0	0	0	0	0	0	0	0	0	0	0	0	0	0	0	0	1	0	0	0	0	0	0	0	0	0	0	0	0	0	0	0	0	0	0	0	0	0	0	0	0	0
5	0.1.7.1.1.12	Dysgonomonadaceae	386	0	0	0	0	0	0	0	0	0	0	0	0	0	0	0	0	0	0	0	1	0	0	0	0	0	0	0	0	0	0	0	0	0	0	0	0	3	0	0	0	0	0	0	4	0	0
6	0.1.7.1.1.12.1	Candidatus_Armantifilum	7	0	0	0	0	0	0	0	0	0	0	0	0	0	0	0	0	0	0	0	0	0	0	0	0	0	0	0	0	0	0	0	0	0	0	0	0	0	0	0	0	0	0	0	0	0	0
6	0.1.7.1.1.12.2	Dysgonomonadaceae_ge	3	0	0	0	0	0	0	0	0	0	0	0	0	0	0	0	0	0	0	0	0	0	0	0	0	0	0	0	0	0	0	0	0	0	0	0	0	0	0	0	0	0	0	0	0	0	0
6	0.1.7.1.1.12.3	Dysgonomonadaceae_unclassified	259	0	0	0	0	0	0	0	0	0	0	0	0	0	0	0	0	0	0	0	1	0	0	0	0	0	0	0	0	0	0	0	0	0	0	0	0	2	0	0	0	0	0	0	4	0	0
6	0.1.7.1.1.12.4	Petrimonas	10	0	0	0	0	0	0	0	0	0	0	0	0	0	0	0	0	0	0	0	0	0	0	0	0	0	0	0	0	0	0	0	0	0	0	0	0	0	0	0	0	0	0	0	0	0	0
6	0.1.7.1.1.12.5	uncultured	107	0	0	0	0	0	0	0	0	0	0	0	0	0	0	0	0	0	0	0	0	0	0	0	0	0	0	0	0	0	0	0	0	0	0	0	0	1	0	0	0	0	0	0	0	0	0
5	0.1.7.1.1.13	F082	160296	3006	0	1	9	1091	2634	928	783	1	10852	0	602	5089	971	1342	1985	15963	0	1001	964	847	2762	2115	818	867	787	1665	3209	5311	5539	1	2644	1091	4378	649	1812	21	29	0	29	151	0	57	6	2	35
6	0.1.7.1.1.13.1	F082_ge	160296	3006	0	1	9	1091	2634	928	783	1	10852	0	602	5089	971	1342	1985	15963	0	1001	964	847	2762	2115	818	867	787	1665	3209	5311	5539	1	2644	1091	4378	649	1812	21	29	0	29	151	0	57	6	2	35
5	0.1.7.1.1.14	GZKB124	49	0	0	0	0	0	1	1	6	0	0	0	1	2	0	0	0	1	0	0	0	2	0	0	0	3	1	0	4	0	2	0	0	0	0	0	1	0	0	0	0	0	0	0	0	0	0
6	0.1.7.1.1.14.1	GZKB124_ge	49	0	0	0	0	0	1	1	6	0	0	0	1	2	0	0	0	1	0	0	0	2	0	0	0	3	1	0	4	0	2	0	0	0	0	0	1	0	0	0	0	0	0	0	0	0	0
5	0.1.7.1.1.15	M2PB4-65_termite_group	940	0	0	0	0	0	3	0	0	0	0	0	0	0	1	0	0	0	0	2	0	0	3	1	0	2	3	1	0	0	0	0	2	0	0	0	1	0	0	0	0	0	0	0	0	0	0
6	0.1.7.1.1.15.1	M2PB4-65_termite_group_ge	940	0	0	0	0	0	3	0	0	0	0	0	0	0	1	0	0	0	0	2	0	0	3	1	0	2	3	1	0	0	0	0	2	0	0	0	1	0	0	0	0	0	0	0	0	0	0
5	0.1.7.1.1.16	Marinifilaceae	9797	1	0	0	0	3	4	9	10	0	8	0	1	13	7	2	5	53	0	47	13	18	15	15	6	17	9	26	26	0	125	0	73	6	76	12	23	2	4	0	1	0	0	8	0	0	5
6	0.1.7.1.1.16.1	Butyricimonas	8532	0	0	0	0	0	1	0	0	0	0	0	0	0	0	0	0	0	0	3	0	2	0	0	2	1	0	2	3	0	3	0	5	0	3	2	0	2	4	0	1	0	0	8	0	0	3
6	0.1.7.1.1.16.2	Marinifilaceae_unclassified	84	0	0	0	0	0	0	0	0	0	0	0	0	0	0	0	0	0	0	0	0	0	0	0	0	0	0	0	0	0	0	0	0	0	0	0	0	0	0	0	0	0	0	0	0	0	2
6	0.1.7.1.1.16.3	Odoribacter	250	0	0	0	0	0	0	0	0	0	0	0	0	0	0	0	0	0	0	0	0	0	0	0	0	0	0	0	0	0	0	0	0	0	0	0	0	0	0	0	0	0	0	0	0	0	0
6	0.1.7.1.1.16.4	Sanguibacteroides	86	0	0	0	0	0	0	0	0	0	0	0	0	0	0	0	0	0	0	0	0	0	0	0	0	0	0	0	0	0	0	0	0	0	0	0	0	0	0	0	0	0	0	0	0	0	0
6	0.1.7.1.1.16.5	uncultured	845	1	0	0	0	3	3	9	10	0	8	0	1	13	7	2	5	53	0	44	13	16	15	15	4	16	9	24	23	0	122	0	68	6	73	10	23	0	0	0	0	0	0	0	0	0	0
5	0.1.7.1.1.17	Marinilabiliaceae	814	0	0	0	0	1	6	0	6	0	14	0	10	16	1	1	25	23	0	6	92	7	3	46	1	8	0	0	57	0	12	0	123	2	3	0	2	0	0	0	0	0	0	2	0	0	0
6	0.1.7.1.1.17.1	Marinilabilia	1	0	0	0	0	0	0	0	0	0	0	0	0	0	0	0	0	0	0	0	0	0	0	0	0	0	0	0	0	0	0	0	0	0	0	0	0	0	0	0	0	0	0	0	0	0	0
6	0.1.7.1.1.17.2	Marinilabiliaceae_unclassified	27	0	0	0	0	0	0	0	1	0	0	0	0	0	0	1	0	2	0	0	0	0	0	1	1	0	0	0	0	0	1	0	0	0	0	0	0	0	0	0	0	0	0	0	0	0	0
6	0.1.7.1.1.17.3	Natronoflexus	2	0	0	0	0	0	0	0	0	0	0	0	0	0	1	0	1	0	0	0	0	0	0	0	0	0	0	0	0	0	0	0	0	0	0	0	0	0	0	0	0	0	0	0	0	0	0
6	0.1.7.1.1.17.4	Thermophagus	2	0	0	0	0	0	0	0	0	0	0	0	0	0	0	0	0	0	0	0	0	0	0	0	0	0	0	0	0	0	0	0	0	0	0	0	0	0	0	0	0	0	0	0	0	0	0
6	0.1.7.1.1.17.5	uncultured	782	0	0	0	0	1	6	0	5	0	14	0	10	16	0	0	24	21	0	6	92	7	3	45	0	8	0	0	57	0	11	0	123	2	3	0	2	0	0	0	0	0	0	2	0	0	0
5	0.1.7.1.1.18	Muribaculaceae	141013	246	2	3	2	239	655	8726	499	1	1048	0	308	799	5010	13220	832	4446	0	7560	424	1180	6207	4340	912	1204	206	2235	561	1404	950	1	915	983	1138	5800	2650	20	57	0	44	31	0	98	13	2	100
6	0.1.7.1.1.18.1	CAG-873	22	1	0	0	0	0	0	0	0	0	0	0	0	0	0	2	0	0	0	0	0	2	0	1	0	0	0	0	0	2	1	0	0	1	0	0	1	0	0	0	0	0	0	0	0	0	0
6	0.1.7.1.1.18.2	Muribaculaceae_ge	138785	242	2	3	2	236	648	8705	492	1	1036	0	308	787	4988	13177	820	4435	0	7539	422	1167	6195	4332	911	1184	196	2223	555	1368	942	1	907	974	1138	5797	2640	12	48	0	38	27	0	92	12	2	82
6	0.1.7.1.1.18.3	Muribaculaceae_unclassified	1774	3	0	0	0	3	7	21	7	0	12	0	0	12	22	41	12	11	0	21	2	11	12	7	1	20	10	12	6	34	7	0	8	8	0	3	9	8	9	0	6	4	0	6	1	0	18
6	0.1.7.1.1.18.4	Muribaculum	432	0	0	0	0	0	0	0	0	0	0	0	0	0	0	0	0	0	0	0	0	0	0	0	0	0	0	0	0	0	0	0	0	0	0	0	0	0	0	0	0	0	0	0	0	0	0
5	0.1.7.1.1.19	Paludibacteraceae	885	4	0	0	0	0	0	0	1	0	0	0	0	0	61	0	1	0	0	0	9	10	39	2	0	16	1	0	0	1	5	0	4	1	2	15	0	0	0	0	0	0	0	3	0	0	1
6	0.1.7.1.1.19.1	H1	28	0	0	0	0	0	0	0	1	0	0	0	0	0	3	0	0	0	0	0	0	0	0	0	0	0	0	0	0	0	0	0	0	0	0	0	0	0	0	0	0	0	0	0	0	0	0
6	0.1.7.1.1.19.2	Microbacter	2	0	0	0	0	0	0	0	0	0	0	0	0	0	0	0	0	0	0	0	0	0	0	1	0	0	0	0	0	0	0	0	0	0	0	0	0	0	0	0	0	0	0	0	0	0	0
6	0.1.7.1.1.19.3	Paludibacter	1	0	0	0	0	0	0	0	0	0	0	0	0	0	0	0	0	0	0	0	0	0	0	0	0	0	0	0	0	0	0	0	0	0	0	0	0	0	0	0	0	0	0	0	0	0	1
6	0.1.7.1.1.19.4	Paludibacteraceae_unclassified	57	0	0	0	0	0	0	0	0	0	0	0	0	0	0	0	0	0	0	0	1	0	2	1	0	0	0	0	0	1	0	0	0	0	2	0	0	0	0	0	0	0	0	0	0	0	0
6	0.1.7.1.1.19.5	uncultured	797	4	0	0	0	0	0	0	0	0	0	0	0	0	58	0	1	0	0	0	8	10	37	0	0	16	1	0	0	0	5	0	4	1	0	15	0	0	0	0	0	0	0	3	0	0	0
5	0.1.7.1.1.20	Porphyromonadaceae	87	0	0	0	0	0	0	0	0	0	0	0	0	0	0	0	0	1	0	0	0	0	0	0	1	0	0	0	0	0	3	0	1	2	0	0	0	2	0	0	0	0	0	2	0	0	0
6	0.1.7.1.1.20.1	Porphyromonadaceae_ge	85	0	0	0	0	0	0	0	0	0	0	0	0	0	0	0	0	1	0	0	0	0	0	0	1	0	0	0	0	0	3	0	1	2	0	0	0	2	0	0	0	0	0	2	0	0	0
6	0.1.7.1.1.20.2	Porphyromonadaceae_unclassified	1	0	0	0	0	0	0	0	0	0	0	0	0	0	0	0	0	0	0	0	0	0	0	0	0	0	0	0	0	0	0	0	0	0	0	0	0	0	0	0	0	0	0	0	0	0	0
6	0.1.7.1.1.20.3	Porphyromonas	1	0	0	0	0	0	0	0	0	0	0	0	0	0	0	0	0	0	0	0	0	0	0	0	0	0	0	0	0	0	0	0	0	0	0	0	0	0	0	0	0	0	0	0	0	0	0
5	0.1.7.1.1.21	Prevotellaceae	744012	13234	1	8	46	11067	4801	9406	39159	4	5806	3	6110	7025	27444	4093	14765	26649	0	8199	6263	9461	13775	8107	15118	8970	4611	3903	11943	12735	33839	3	10015	7464	18504	2144	12097	110	182	0	239	296	0	362	56	25	334
6	0.1.7.1.1.21.1	Alloprevotella	1424	4	0	0	2	5	23	20	17	0	0	0	0	18	132	81	15	30	0	7	31	9	45	17	15	37	7	18	3	24	81	0	21	7	47	3	18	0	1	0	0	0	0	1	0	0	0
6	0.1.7.1.1.21.2	Paraprevotella	143	0	0	0	0	0	0	0	1	0	0	0	0	1	0	0	0	0	0	0	4	0	1	3	1	47	6	0	1	3	5	0	0	0	3	0	0	0	0	0	0	0	0	0	0	1	0
6	0.1.7.1.1.21.3	Prevotella	445312	6330	1	6	29	3798	2526	8377	13181	0	4632	0	5164	3949	3446	2729	7565	16961	0	5657	5419	7156	10559	6952	11645	5444	2562	3187	6818	9898	27233	3	8552	6818	14989	1321	10657	45	78	0	48	186	0	166	27	16	127
6	0.1.7.1.1.21.4	Prevotella_7	60	0	0	0	0	0	0	2	0	0	0	0	2	0	0	0	0	0	0	1	0	1	0	0	0	0	1	0	2	4	0	0	0	0	0	0	5	0	0	0	2	0	0	0	0	0	0
6	0.1.7.1.1.21.5	Prevotella_9	15	0	0	0	0	0	0	0	0	0	0	0	0	0	0	0	0	0	0	0	0	0	0	0	0	0	0	0	0	0	0	0	1	0	0	0	0	0	0	0	0	0	0	0	0	0	0
6	0.1.7.1.1.21.6	Prevotellaceae_Ga6A1_group	5039	53	0	0	1	9	1	14	1	0	75	0	110	129	13	9	0	3	0	24	0	28	7	0	20	66	165	0	119	20	1788	0	70	0	76	0	50	2	2	0	0	0	0	3	0	0	0
6	0.1.7.1.1.21.7	Prevotellaceae_NK3B31_group	6516	228	0	0	0	103	67	17	128	0	143	0	28	382	57	30	134	321	0	159	35	45	20	36	70	77	34	170	89	117	170	0	102	34	43	20	14	0	0	0	0	1	0	1	0	0	4
6	0.1.7.1.1.21.8	Prevotellaceae_UCG-001	33299	601	0	2	3	411	303	155	2050	1	184	0	133	300	2160	295	975	214	0	277	336	682	554	501	432	2022	176	187	473	596	1436	0	212	118	411	400	507	3	3	0	2	17	0	6	4	0	11
6	0.1.7.1.1.21.9	Prevotellaceae_UCG-003	23037	112	0	0	2	20	320	266	188	0	170	0	227	608	200	47	184	1772	0	366	207	359	601	272	140	264	83	97	287	639	845	0	217	160	889	51	330	3	6	0	2	28	0	14	3	0	5
6	0.1.7.1.1.21.10	Prevotellaceae_UCG-004	15236	23	0	0	2	236	24	44	11	0	22	0	10	105	21	76	16	21	0	21	6	8	109	25	96	82	40	66	19	909	61	0	48	9	172	19	41	0	1	0	0	4	0	12	0	2	4
6	0.1.7.1.1.21.11	Prevotellaceae_YAB2003_group	3863	9	0	0	0	10	60	10	20	0	13	0	52	37	4	16	192	41	0	7	57	20	18	13	93	47	49	34	15	29	69	0	45	11	75	11	12	1	0	0	0	5	0	5	0	2	0
6	0.1.7.1.1.21.12	Prevotellaceae_ge	2169	23	0	0	0	28	6	9	59	0	7	0	5	14	55	4	36	32	0	13	4	5	12	13	16	5	1	2	10	4	109	0	15	1	21	2	14	1	3	0	0	1	0	8	0	0	5
6	0.1.7.1.1.21.13	Prevotellaceae_unclassified	203852	5817	0	0	7	6442	1469	455	23417	3	476	3	369	1467	21281	803	5606	7214	0	1649	153	921	1446	274	2434	804	1485	138	3926	479	2011	0	524	302	1501	285	438	54	87	0	184	53	0	144	21	4	175
6	0.1.7.1.1.21.14	uncultured	4047	34	0	0	0	5	2	37	86	0	84	0	10	15	75	3	42	40	0	18	11	227	403	1	156	75	2	4	181	13	31	0	208	4	277	32	11	1	1	0	1	1	0	2	1	0	3
5	0.1.7.1.1.22	Prolixibacteraceae	5	0	0	0	0	0	0	0	0	0	0	0	0	0	0	0	0	0	0	0	0	0	0	0	0	0	0	0	0	0	0	0	0	1	0	0	0	0	0	0	0	0	0	0	0	0	0
6	0.1.7.1.1.22.1	BSV13	1	0	0	0	0	0	0	0	0	0	0	0	0	0	0	0	0	0	0	0	0	0	0	0	0	0	0	0	0	0	0	0	0	0	0	0	0	0	0	0	0	0	0	0	0	0	0
6	0.1.7.1.1.22.2	Mangrovibacterium	1	0	0	0	0	0	0	0	0	0	0	0	0	0	0	0	0	0	0	0	0	0	0	0	0	0	0	0	0	0	0	0	0	0	0	0	0	0	0	0	0	0	0	0	0	0	0
6	0.1.7.1.1.22.3	Prolixibacteraceae_unclassified	2	0	0	0	0	0	0	0	0	0	0	0	0	0	0	0	0	0	0	0	0	0	0	0	0	0	0	0	0	0	0	0	0	1	0	0	0	0	0	0	0	0	0	0	0	0	0
6	0.1.7.1.1.22.4	Tangfeifania	1	0	0	0	0	0	0	0	0	0	0	0	0	0	0	0	0	0	0	0	0	0	0	0	0	0	0	0	0	0	0	0	0	0	0	0	0	0	0	0	0	0	0	0	0	0	0
5	0.1.7.1.1.23	Rikenellaceae	238762	8940	0	0	8	3321	1407	742	3017	0	3002	0	965	4668	6954	8511	8480	4289	0	1645	1573	2245	4828	2095	6993	3631	1199	883	2921	6915	6021	1	1946	2165	2809	920	2415	26	32	0	62	87	0	62	13	14	75
6	0.1.7.1.1.23.1	Alistipes	14004	1	0	0	0	0	0	1	0	0	0	0	0	0	0	0	0	0	0	3	0	1	0	0	1	0	0	0	0	1	2	0	7	0	0	5	1	1	0	0	1	7	0	0	0	2	1
6	0.1.7.1.1.23.2	Bact-08	3	0	0	0	0	0	0	0	0	0	0	0	0	0	0	0	1	0	0	0	0	0	0	0	0	0	0	0	0	0	0	0	0	0	0	0	0	0	0	0	0	0	0	0	0	0	0
6	0.1.7.1.1.23.3	DMER64	4	0	0	0	0	0	0	0	0	0	0	0	0	0	0	1	0	0	0	0	0	0	0	0	0	1	0	0	0	0	0	0	0	0	0	0	0	0	0	0	0	0	0	0	0	0	0
6	0.1.7.1.1.23.4	Mucinivorans	17	0	0	0	0	0	0	0	0	0	0	0	0	0	0	0	0	0	0	0	0	0	0	0	0	0	0	0	0	0	0	0	0	0	0	0	0	0	0	0	0	0	0	0	0	0	0
6	0.1.7.1.1.23.5	Rikenella	2	0	0	0	0	0	0	0	0	0	0	0	0	0	0	0	0	0	0	0	0	0	0	0	0	0	0	0	0	0	0	0	0	0	0	0	0	0	0	0	0	0	0	0	0	0	0
6	0.1.7.1.1.23.6	Rikenellaceae_RC9_gut_group	216155	8715	0	0	8	3304	1384	725	2784	0	2954	0	952	4615	6909	8411	8396	4222	0	1603	1516	2215	4787	2049	6924	3576	1186	873	2887	6798	5955	0	1904	2142	2782	887	2383	20	27	0	46	77	0	55	10	12	66
6	0.1.7.1.1.23.7	Rikenellaceae_ge	21	0	0	0	0	0	0	0	0	0	0	0	0	1	0	0	0	0	0	0	0	0	0	0	0	0	0	0	0	0	0	0	0	0	0	0	0	0	0	0	0	0	0	0	0	0	0
6	0.1.7.1.1.23.8	Rikenellaceae_unclassified	4493	28	0	0	0	14	13	8	19	0	42	0	9	45	32	41	63	21	0	25	9	22	29	10	36	40	13	8	21	41	40	1	22	18	7	16	16	5	3	0	13	1	0	5	3	0	7
6	0.1.7.1.1.23.9	S50_wastewater-sludge_group	87	0	0	0	0	0	0	0	0	0	0	0	0	1	0	4	1	0	0	0	1	0	0	0	2	0	0	0	3	1	3	0	2	0	0	0	1	0	0	0	1	0	0	0	0	0	0
6	0.1.7.1.1.23.10	U29-B03	1248	196	0	0	0	3	7	8	214	0	4	0	4	4	12	54	19	41	0	12	46	4	9	36	29	14	0	1	10	72	10	0	11	5	18	4	14	0	0	0	1	2	0	0	0	0	0
6	0.1.7.1.1.23.11	dgA-11_gut_group	2571	0	0	0	0	0	0	0	0	0	0	0	0	0	0	0	0	0	0	0	0	0	0	0	0	0	0	0	0	0	0	0	0	0	0	3	0	0	2	0	0	0	0	2	0	0	1
6	0.1.7.1.1.23.12	hoa5-07d05_gut_group	154	0	0	0	0	0	3	0	0	0	2	0	0	2	1	0	0	5	0	2	1	3	3	0	1	0	0	1	0	2	11	0	0	0	2	5	0	0	0	0	0	0	0	0	0	0	0
6	0.1.7.1.1.23.13	uncultured	3	0	0	0	0	0	0	0	0	0	0	0	0	0	0	0	0	0	0	0	0	0	0	0	0	0	0	0	0	0	0	0	0	0	0	0	0	0	0	0	0	0	0	0	0	0	0
5	0.1.7.1.1.24	Tannerellaceae	643	0	0	0	0	0	0	0	0	0	0	0	0	0	0	0	0	0	0	0	0	0	1	0	0	0	0	0	0	0	0	0	0	0	0	0	0	0	0	0	0	0	0	0	0	0	0
6	0.1.7.1.1.24.1	Parabacteroides	594	0	0	0	0	0	0	0	0	0	0	0	0	0	0	0	0	0	0	0	0	0	0	0	0	0	0	0	0	0	0	0	0	0	0	0	0	0	0	0	0	0	0	0	0	0	0
6	0.1.7.1.1.24.2	Tannerella	3	0	0	0	0	0	0	0	0	0	0	0	0	0	0	0	0	0	0	0	0	0	1	0	0	0	0	0	0	0	0	0	0	0	0	0	0	0	0	0	0	0	0	0	0	0	0
6	0.1.7.1.1.24.3	Tannerellaceae_ge	14	0	0	0	0	0	0	0	0	0	0	0	0	0	0	0	0	0	0	0	0	0	0	0	0	0	0	0	0	0	0	0	0	0	0	0	0	0	0	0	0	0	0	0	0	0	0
6	0.1.7.1.1.24.4	Tannerellaceae_unclassified	31	0	0	0	0	0	0	0	0	0	0	0	0	0	0	0	0	0	0	0	0	0	0	0	0	0	0	0	0	0	0	0	0	0	0	0	0	0	0	0	0	0	0	0	0	0	0
6	0.1.7.1.1.24.5	uncultured	1	0	0	0	0	0	0	0	0	0	0	0	0	0	0	0	0	0	0	0	0	0	0	0	0	0	0	0	0	0	0	0	0	0	0	0	0	0	0	0	0	0	0	0	0	0	0
5	0.1.7.1.1.25	Williamwhitmaniaceae	54	1	0	0	0	0	0	4	2	0	0	0	1	1	0	2	0	0	0	1	0	1	2	1	5	1	0	0	0	2	1	0	1	0	6	0	0	0	0	0	0	0	0	0	0	0	0
6	0.1.7.1.1.25.1	Blvii28_wastewater-sludge_group	22	1	0	0	0	0	0	3	1	0	0	0	0	0	0	0	0	0	0	0	0	0	0	0	5	0	0	0	0	0	0	0	0	0	5	0	0	0	0	0	0	0	0	0	0	0	0
6	0.1.7.1.1.25.2	Rs-D38_termite_group	24	0	0	0	0	0	0	0	0	0	0	0	1	1	0	2	0	0	0	0	0	0	2	1	0	0	0	0	0	2	1	0	1	0	1	0	0	0	0	0	0	0	0	0	0	0	0
6	0.1.7.1.1.25.3	Williamwhitmaniaceae_ge	3	0	0	0	0	0	0	0	1	0	0	0	0	0	0	0	0	0	0	0	0	0	0	0	0	0	0	0	0	0	0	0	0	0	0	0	0	0	0	0	0	0	0	0	0	0	0
6	0.1.7.1.1.25.4	Williamwhitmaniaceae_unclassified	2	0	0	0	0	0	0	0	0	0	0	0	0	0	0	0	0	0	0	1	0	0	0	0	0	0	0	0	0	0	0	0	0	0	0	0	0	0	0	0	0	0	0	0	0	0	0
6	0.1.7.1.1.25.5	uncultured	3	0	0	0	0	0	0	1	0	0	0	0	0	0	0	0	0	0	0	0	0	1	0	0	0	1	0	0	0	0	0	0	0	0	0	0	0	0	0	0	0	0	0	0	0	0	0
5	0.1.7.1.1.26	p-251-o5	9196	9	0	1	0	42	593	1	51	0	190	0	3	41	5	4	231	1096	0	852	187	5	221	41	3	11	34	329	59	8	1086	0	10	108	257	30	83	1	0	0	0	30	0	2	0	1	6
6	0.1.7.1.1.26.1	p-251-o5_ge	9196	9	0	1	0	42	593	1	51	0	190	0	3	41	5	4	231	1096	0	852	187	5	221	41	3	11	34	329	59	8	1086	0	10	108	257	30	83	1	0	0	0	30	0	2	0	1	6
5	0.1.7.1.1.27	p-2534-18B5_gut_group	11592	3	0	0	0	197	270	0	0	0	0	0	1	0	327	0	0	19	0	12	1195	2	39	33	0	14	577	1	612	0	727	0	3	453	0	3	2	0	1	0	0	1	0	0	0	0	1
6	0.1.7.1.1.27.1	p-2534-18B5_gut_group_ge	11592	3	0	0	0	197	270	0	0	0	0	0	1	0	327	0	0	19	0	12	1195	2	39	33	0	14	577	1	612	0	727	0	3	453	0	3	2	0	1	0	0	1	0	0	0	0	1
5	0.1.7.1.1.28	uncultured	24069	122	0	0	0	37	191	92	225	0	197	0	77	146	152	48	78	647	1	121	332	230	370	220	384	561	93	92	279	267	878	1	146	277	337	105	328	8	5	0	0	18	0	5	2	2	14
6	0.1.7.1.1.28.1	uncultured_ge	24069	122	0	0	0	37	191	92	225	0	197	0	77	146	152	48	78	647	1	121	332	230	370	220	384	561	93	92	279	267	878	1	146	277	337	105	328	8	5	0	0	18	0	5	2	2	14
4	0.1.7.1.2	Bacteroidia_unclassified	13710	147	0	1	1	82	87	79	200	0	112	0	158	95	174	90	198	159	0	251	194	366	434	460	101	117	85	41	222	142	384	0	324	316	444	30	131	41	34	0	64	6	0	30	12	2	42
5	0.1.7.1.2.1	Bacteroidia_unclassified	13710	147	0	1	1	82	87	79	200	0	112	0	158	95	174	90	198	159	0	251	194	366	434	460	101	117	85	41	222	142	384	0	324	316	444	30	131	41	34	0	64	6	0	30	12	2	42
6	0.1.7.1.2.1.1	Bacteroidia_unclassified	13710	147	0	1	1	82	87	79	200	0	112	0	158	95	174	90	198	159	0	251	194	366	434	460	101	117	85	41	222	142	384	0	324	316	444	30	131	41	34	0	64	6	0	30	12	2	42
4	0.1.7.1.3	Chitinophagales	432323	8	0	18	10	44	181	56	121	0	23	0	102	30	40	170	121	377	0	621	68	39	104	37	257	181	101	198	433	272	658	0	1148	314	131	563	257	782	1022	0	1560	85	2	1283	265	128	911
5	0.1.7.1.3.1	37-13	10	0	0	0	0	0	0	0	0	0	0	0	0	0	0	0	0	0	0	0	0	0	0	0	0	0	0	0	0	0	0	0	0	0	0	0	0	0	0	0	0	0	0	0	0	0	0
6	0.1.7.1.3.1.1	37-13_ge	10	0	0	0	0	0	0	0	0	0	0	0	0	0	0	0	0	0	0	0	0	0	0	0	0	0	0	0	0	0	0	0	0	0	0	0	0	0	0	0	0	0	0	0	0	0	0
5	0.1.7.1.3.2	Chitinophagaceae	431978	8	0	18	10	44	181	56	121	0	23	0	102	30	40	170	121	377	0	621	68	39	104	37	257	181	101	198	433	272	658	0	1148	312	131	560	257	779	1022	0	1560	85	2	1277	265	128	903
6	0.1.7.1.3.2.1	Aurantisolimonas	39	0	0	0	0	0	0	0	0	0	0	0	0	0	0	0	0	0	0	0	0	0	0	0	0	0	0	0	0	0	0	0	0	0	0	0	0	0	0	0	0	0	0	1	0	0	0
6	0.1.7.1.3.2.2	Chitinophaga	1038	0	0	1	0	0	1	0	0	0	0	0	0	0	0	0	0	0	0	4	0	0	1	0	3	0	0	1	0	0	0	0	9	2	2	2	0	0	2	0	0	0	0	0	0	0	2
6	0.1.7.1.3.2.3	Chitinophagaceae_ge	246	0	0	0	0	0	1	0	0	0	0	0	0	0	0	0	0	0	0	0	0	0	0	0	0	0	0	0	0	0	0	0	0	0	0	3	0	1	0	0	1	0	0	1	3	0	2
6	0.1.7.1.3.2.4	Chitinophagaceae_unclassified	357587	8	0	17	5	37	141	48	98	0	21	0	88	29	33	146	99	324	0	506	54	34	80	33	214	158	83	171	379	214	539	0	945	272	116	451	212	596	747	0	1120	72	1	944	190	87	622
6	0.1.7.1.3.2.5	Cnuella	28	0	0	0	0	0	0	0	0	0	0	0	0	0	0	0	0	0	0	0	0	0	0	0	0	0	0	0	0	0	0	0	0	0	0	0	0	0	0	0	2	0	0	0	0	0	0
6	0.1.7.1.3.2.6	Dinghuibacter	12	0	0	0	0	0	0	0	0	0	0	0	0	0	0	0	0	0	0	0	0	0	0	0	0	0	0	0	0	0	0	0	0	0	0	0	0	0	0	0	0	0	0	0	0	0	0
6	0.1.7.1.3.2.7	Edaphobaculum	32	0	0	0	0	0	0	0	0	0	0	0	0	0	0	0	0	0	0	0	0	0	0	0	0	0	0	0	0	0	0	0	0	0	0	3	0	0	0	0	0	0	0	0	0	0	0
6	0.1.7.1.3.2.8	Ferruginibacter	47191	0	0	0	1	4	24	7	12	0	2	0	8	0	3	15	15	37	0	45	5	1	14	1	32	15	12	15	37	33	61	0	135	18	8	76	27	102	108	0	180	0	0	138	22	23	106
6	0.1.7.1.3.2.9	Filimonas	2	0	0	0	0	0	0	0	0	0	0	0	0	0	0	0	0	0	0	0	0	0	0	0	0	0	0	0	0	0	0	0	0	0	0	0	0	0	0	0	0	0	0	0	0	0	0
6	0.1.7.1.3.2.10	Flaviaesturariibacter	160	0	0	0	0	0	0	0	0	0	0	0	0	0	0	0	0	0	0	0	0	0	0	0	0	0	0	0	0	0	0	0	0	0	0	0	0	0	2	0	1	0	0	0	2	0	0
6	0.1.7.1.3.2.11	Flavihumibacter	13	0	0	0	0	0	0	0	0	0	0	0	0	0	0	0	0	0	0	0	0	0	2	0	0	0	0	0	0	0	0	0	0	0	0	0	0	0	0	0	0	0	0	0	0	0	0
6	0.1.7.1.3.2.12	Flavisolibacter	1463	0	0	0	0	0	0	0	0	0	0	0	0	0	0	0	0	0	0	8	0	0	0	0	1	0	2	0	1	0	2	0	4	2	0	0	1	0	11	0	6	0	0	1	0	0	0
6	0.1.7.1.3.2.13	Flavitalea	1	0	0	0	0	0	0	0	0	0	0	0	0	0	0	0	0	0	0	0	0	0	0	0	0	0	0	0	0	0	0	0	0	0	0	0	0	0	0	0	0	0	0	0	0	0	0
6	0.1.7.1.3.2.14	Heliimonas	2	0	0	0	0	0	0	0	0	0	0	0	0	0	0	0	0	0	0	0	0	0	0	0	0	0	0	0	0	0	0	0	0	0	0	0	0	0	0	0	0	0	0	0	0	0	0
6	0.1.7.1.3.2.15	Lacibacter	22	0	0	0	0	0	0	0	0	0	0	0	0	0	0	0	0	0	0	0	0	0	0	0	0	0	0	0	0	0	0	0	0	0	0	0	0	0	0	0	0	0	0	0	0	0	0
6	0.1.7.1.3.2.16	Niabella	55	0	0	0	0	0	0	0	0	0	0	0	0	0	0	0	0	0	0	0	0	0	0	0	0	0	0	0	0	0	1	0	1	0	0	0	0	0	1	0	0	0	0	0	1	0	0
6	0.1.7.1.3.2.17	Niastella	12	0	0	0	0	0	0	0	0	0	0	0	0	0	0	0	0	0	0	0	0	0	0	0	0	0	0	0	0	0	1	0	0	0	0	0	0	0	0	0	0	0	0	0	0	0	0
6	0.1.7.1.3.2.18	Niveitalea	77	0	0	0	0	1	0	0	0	0	0	0	0	0	0	0	1	0	0	0	0	0	0	0	0	0	0	0	0	0	1	0	1	0	0	0	1	0	0	0	0	0	0	0	0	0	0
6	0.1.7.1.3.2.19	Parafilimonas	511	0	0	0	0	0	0	0	0	0	0	0	0	0	0	0	0	0	0	0	0	0	0	0	0	0	0	0	0	0	2	0	0	0	0	0	0	3	3	0	5	0	0	12	0	0	8
6	0.1.7.1.3.2.20	Parasediminibacterium	1	0	0	0	0	0	0	0	0	0	0	0	0	0	0	0	0	0	0	0	0	0	0	0	0	0	0	0	0	0	0	0	0	0	0	0	0	0	0	0	0	0	0	0	0	0	0
6	0.1.7.1.3.2.21	Parasegetibacter	4	0	0	0	0	0	0	0	0	0	0	0	0	0	0	0	0	0	0	0	0	0	0	0	0	0	0	0	0	0	0	0	0	0	0	0	0	0	0	0	0	0	0	0	0	0	0
6	0.1.7.1.3.2.22	Pseudoflavitalea	44	0	0	0	0	0	0	0	0	0	0	0	0	0	0	0	0	0	0	0	0	0	0	0	0	0	0	0	0	0	1	0	0	0	0	0	0	0	0	0	0	0	0	3	0	0	1
6	0.1.7.1.3.2.23	Puia	4	0	0	0	0	0	0	0	0	0	0	0	0	0	0	0	0	0	0	0	0	0	0	0	0	0	0	0	0	0	0	0	0	1	0	0	0	0	0	0	0	0	0	0	0	0	0
6	0.1.7.1.3.2.24	Rurimicrobium	2	0	0	0	0	0	0	0	0	0	0	0	0	0	0	0	0	0	0	0	0	0	0	0	0	0	0	0	0	0	0	0	0	0	0	0	0	0	0	0	0	0	0	0	0	0	0
6	0.1.7.1.3.2.25	Sediminibacterium	6	0	0	0	0	0	0	0	0	0	0	0	0	0	0	0	0	0	0	0	0	0	0	0	0	0	0	0	0	0	0	0	0	0	0	0	0	0	0	0	0	0	0	0	0	0	0
6	0.1.7.1.3.2.26	Taibaiella	5	0	0	0	0	0	0	0	0	0	0	0	0	0	0	0	0	0	0	0	0	0	0	0	0	0	0	0	0	0	0	0	0	0	0	0	0	0	0	0	0	0	0	0	0	0	0
6	0.1.7.1.3.2.27	Terrimonas	3643	0	0	0	0	0	1	0	3	0	0	0	0	0	0	2	1	2	0	11	1	2	3	0	2	0	1	1	0	4	12	0	22	2	0	4	1	3	2	0	21	0	0	7	2	0	16
6	0.1.7.1.3.2.28	UTBCD1	19075	0	0	0	4	1	7	1	8	0	0	0	5	1	2	7	5	13	0	47	8	2	4	3	4	8	3	9	16	21	37	0	29	15	4	21	14	70	144	0	222	13	1	169	44	18	143
6	0.1.7.1.3.2.29	uncultured	703	0	0	0	0	1	6	0	0	0	0	0	1	0	2	0	0	1	0	0	0	0	0	0	1	0	0	1	0	0	1	0	2	0	1	0	1	4	2	0	2	0	0	1	1	0	3
5	0.1.7.1.3.3	Chitinophagales_unclassified	57	0	0	0	0	0	0	0	0	0	0	0	0	0	0	0	0	0	0	0	0	0	0	0	0	0	0	0	0	0	0	0	0	0	0	0	0	1	0	0	0	0	0	5	0	0	1
6	0.1.7.1.3.3.1	Chitinophagales_unclassified	57	0	0	0	0	0	0	0	0	0	0	0	0	0	0	0	0	0	0	0	0	0	0	0	0	0	0	0	0	0	0	0	0	0	0	0	0	1	0	0	0	0	0	5	0	0	1
5	0.1.7.1.3.4	Saprospiraceae	247	0	0	0	0	0	0	0	0	0	0	0	0	0	0	0	0	0	0	0	0	0	0	0	0	0	0	0	0	0	0	0	0	2	0	3	0	2	0	0	0	0	0	1	0	0	7
6	0.1.7.1.3.4.1	Phaeodactylibacter	15	0	0	0	0	0	0	0	0	0	0	0	0	0	0	0	0	0	0	0	0	0	0	0	0	0	0	0	0	0	0	0	0	0	0	0	0	0	0	0	0	0	0	0	0	0	0
6	0.1.7.1.3.4.2	Saprospiraceae_unclassified	14	0	0	0	0	0	0	0	0	0	0	0	0	0	0	0	0	0	0	0	0	0	0	0	0	0	0	0	0	0	0	0	0	0	0	0	0	0	0	0	0	0	0	0	0	0	0
6	0.1.7.1.3.4.3	uncultured	218	0	0	0	0	0	0	0	0	0	0	0	0	0	0	0	0	0	0	0	0	0	0	0	0	0	0	0	0	0	0	0	0	2	0	3	0	2	0	0	0	0	0	1	0	0	7
5	0.1.7.1.3.5	uncultured	31	0	0	0	0	0	0	0	0	0	0	0	0	0	0	0	0	0	0	0	0	0	0	0	0	0	0	0	0	0	0	0	0	0	0	0	0	0	0	0	0	0	0	0	0	0	0
6	0.1.7.1.3.5.1	uncultured_ge	31	0	0	0	0	0	0	0	0	0	0	0	0	0	0	0	0	0	0	0	0	0	0	0	0	0	0	0	0	0	0	0	0	0	0	0	0	0	0	0	0	0	0	0	0	0	0
4	0.1.7.1.4	Cytophagales	6071	0	0	0	0	1	3	3	4	0	1	0	0	0	1	7	4	7	0	27	0	1	1	7	9	3	5	4	9	7	22	0	25	4	6	10	5	4	8	0	21	3	0	13	4	2	36
5	0.1.7.1.4.1	Cyclobacteriaceae	30	0	0	0	0	0	0	0	2	0	0	0	0	0	0	1	0	0	0	1	0	0	0	4	0	1	2	1	0	0	0	0	0	0	0	0	1	0	1	0	0	0	0	0	0	0	0
6	0.1.7.1.4.1.1	Algoriphagus	1	0	0	0	0	0	0	0	0	0	0	0	0	0	0	0	0	0	0	0	0	0	0	0	0	0	0	0	0	0	0	0	0	0	0	0	0	0	0	0	0	0	0	0	0	0	0
6	0.1.7.1.4.1.2	Aureibacter	1	0	0	0	0	0	0	0	0	0	0	0	0	0	0	0	0	0	0	1	0	0	0	0	0	0	0	0	0	0	0	0	0	0	0	0	0	0	0	0	0	0	0	0	0	0	0
6	0.1.7.1.4.1.3	Cyclobacteriaceae_unclassified	25	0	0	0	0	0	0	0	2	0	0	0	0	0	0	1	0	0	0	0	0	0	0	4	0	1	2	0	0	0	0	0	0	0	0	0	1	0	1	0	0	0	0	0	0	0	0
6	0.1.7.1.4.1.4	Mongoliitalea	1	0	0	0	0	0	0	0	0	0	0	0	0	0	0	0	0	0	0	0	0	0	0	0	0	0	0	1	0	0	0	0	0	0	0	0	0	0	0	0	0	0	0	0	0	0	0
6	0.1.7.1.4.1.5	Nafulsella	2	0	0	0	0	0	0	0	0	0	0	0	0	0	0	0	0	0	0	0	0	0	0	0	0	0	0	0	0	0	0	0	0	0	0	0	0	0	0	0	0	0	0	0	0	0	0
5	0.1.7.1.4.2	Cytophagaceae	61	0	0	0	0	0	1	0	0	0	0	0	0	0	0	0	0	0	0	0	0	0	0	0	0	0	0	0	0	0	0	0	0	0	0	0	0	0	0	0	0	0	0	0	0	0	5
6	0.1.7.1.4.2.1	Cytophaga	1	0	0	0	0	0	0	0	0	0	0	0	0	0	0	0	0	0	0	0	0	0	0	0	0	0	0	0	0	0	0	0	0	0	0	0	0	0	0	0	0	0	0	0	0	0	0
6	0.1.7.1.4.2.2	Cytophagaceae_unclassified	17	0	0	0	0	0	0	0	0	0	0	0	0	0	0	0	0	0	0	0	0	0	0	0	0	0	0	0	0	0	0	0	0	0	0	0	0	0	0	0	0	0	0	0	0	0	0
6	0.1.7.1.4.2.3	Rhodocytophaga	5	0	0	0	0	0	0	0	0	0	0	0	0	0	0	0	0	0	0	0	0	0	0	0	0	0	0	0	0	0	0	0	0	0	0	0	0	0	0	0	0	0	0	0	0	0	0
6	0.1.7.1.4.2.4	Sporocytophaga	4	0	0	0	0	0	0	0	0	0	0	0	0	0	0	0	0	0	0	0	0	0	0	0	0	0	0	0	0	0	0	0	0	0	0	0	0	0	0	0	0	0	0	0	0	0	0
6	0.1.7.1.4.2.5	uncultured	34	0	0	0	0	0	1	0	0	0	0	0	0	0	0	0	0	0	0	0	0	0	0	0	0	0	0	0	0	0	0	0	0	0	0	0	0	0	0	0	0	0	0	0	0	0	5
5	0.1.7.1.4.3	Cytophagales_unclassified	1437	0	0	0	0	0	0	1	2	0	0	0	0	0	1	5	1	0	0	0	0	1	0	1	6	1	0	2	6	3	7	0	13	2	6	8	1	2	5	0	10	0	0	4	3	1	15
6	0.1.7.1.4.3.1	Cytophagales_unclassified	1437	0	0	0	0	0	0	1	2	0	0	0	0	0	1	5	1	0	0	0	0	1	0	1	6	1	0	2	6	3	7	0	13	2	6	8	1	2	5	0	10	0	0	4	3	1	15
5	0.1.7.1.4.4	Hymenobacteraceae	52	0	0	0	0	0	0	0	0	0	0	0	0	0	0	0	0	0	0	0	0	0	0	0	0	0	0	0	0	0	0	0	0	0	0	0	1	0	0	0	0	0	0	0	0	0	0
6	0.1.7.1.4.4.1	Adhaeribacter	44	0	0	0	0	0	0	0	0	0	0	0	0	0	0	0	0	0	0	0	0	0	0	0	0	0	0	0	0	0	0	0	0	0	0	0	1	0	0	0	0	0	0	0	0	0	0
6	0.1.7.1.4.4.2	Hymenobacter	6	0	0	0	0	0	0	0	0	0	0	0	0	0	0	0	0	0	0	0	0	0	0	0	0	0	0	0	0	0	0	0	0	0	0	0	0	0	0	0	0	0	0	0	0	0	0
6	0.1.7.1.4.4.3	Pontibacter	2	0	0	0	0	0	0	0	0	0	0	0	0	0	0	0	0	0	0	0	0	0	0	0	0	0	0	0	0	0	0	0	0	0	0	0	0	0	0	0	0	0	0	0	0	0	0
5	0.1.7.1.4.5	Microscillaceae	4455	0	0	0	0	1	2	2	0	0	1	0	0	0	0	1	3	7	0	26	0	0	1	2	3	1	3	1	3	4	15	0	12	2	0	2	2	2	2	0	11	3	0	8	1	1	16
6	0.1.7.1.4.5.1	Chryseolinea	522	0	0	0	0	0	0	0	0	0	0	0	0	0	0	0	0	0	0	0	0	0	0	0	2	0	0	0	0	0	0	0	3	0	0	1	0	0	1	0	1	0	0	1	0	0	0
6	0.1.7.1.4.5.2	Flexibacter	1	0	0	0	0	0	0	0	0	0	0	0	0	0	0	0	0	0	0	0	0	0	0	0	0	0	0	0	0	0	0	0	0	0	0	0	0	0	0	0	0	0	0	0	0	0	0
6	0.1.7.1.4.5.3	Hassallia	2217	0	0	0	0	0	1	2	0	0	1	0	0	0	0	0	2	4	0	11	0	0	1	2	1	1	1	1	3	4	8	0	4	0	0	1	1	0	1	0	1	0	0	3	1	0	2
6	0.1.7.1.4.5.4	Microscillaceae_unclassified	966	0	0	0	0	1	0	0	0	0	0	0	0	0	0	1	1	3	0	9	0	0	0	0	0	0	1	0	0	0	6	0	1	0	0	0	0	1	0	0	8	3	0	2	0	1	10
6	0.1.7.1.4.5.5	OLB12	20	0	0	0	0	0	0	0	0	0	0	0	0	0	0	0	0	0	0	2	0	0	0	0	0	0	0	0	0	0	0	0	0	0	0	0	0	0	0	0	0	0	0	0	0	0	0
6	0.1.7.1.4.5.6	Ohtaekwangia	224	0	0	0	0	0	0	0	0	0	0	0	0	0	0	0	0	0	0	0	0	0	0	0	0	0	1	0	0	0	0	0	2	1	0	0	0	0	0	0	0	0	0	0	0	0	0
6	0.1.7.1.4.5.7	uncultured	505	0	0	0	0	0	1	0	0	0	0	0	0	0	0	0	0	0	0	4	0	0	0	0	0	0	0	0	0	0	1	0	2	1	0	0	1	1	0	0	1	0	0	2	0	0	4
5	0.1.7.1.4.6	Spirosomaceae	36	0	0	0	0	0	0	0	0	0	0	0	0	0	0	0	0	0	0	0	0	0	0	0	0	0	0	0	0	0	0	0	0	0	0	0	0	0	0	0	0	0	0	1	0	0	0
6	0.1.7.1.4.6.1	Arcicella	1	0	0	0	0	0	0	0	0	0	0	0	0	0	0	0	0	0	0	0	0	0	0	0	0	0	0	0	0	0	0	0	0	0	0	0	0	0	0	0	0	0	0	0	0	0	0
6	0.1.7.1.4.6.2	Dyadobacter	27	0	0	0	0	0	0	0	0	0	0	0	0	0	0	0	0	0	0	0	0	0	0	0	0	0	0	0	0	0	0	0	0	0	0	0	0	0	0	0	0	0	0	1	0	0	0
6	0.1.7.1.4.6.3	Larkinella	1	0	0	0	0	0	0	0	0	0	0	0	0	0	0	0	0	0	0	0	0	0	0	0	0	0	0	0	0	0	0	0	0	0	0	0	0	0	0	0	0	0	0	0	0	0	0
6	0.1.7.1.4.6.4	Pseudarcicella	4	0	0	0	0	0	0	0	0	0	0	0	0	0	0	0	0	0	0	0	0	0	0	0	0	0	0	0	0	0	0	0	0	0	0	0	0	0	0	0	0	0	0	0	0	0	0
6	0.1.7.1.4.6.5	Spirosoma	3	0	0	0	0	0	0	0	0	0	0	0	0	0	0	0	0	0	0	0	0	0	0	0	0	0	0	0	0	0	0	0	0	0	0	0	0	0	0	0	0	0	0	0	0	0	0
4	0.1.7.1.5	Flavobacteriales	360	0	0	0	0	0	0	0	0	0	1	0	0	1	1	0	0	0	0	2	2	1	1	2	1	0	2	0	6	0	2	0	89	3	2	0	17	0	0	0	0	0	0	0	0	0	1
5	0.1.7.1.5.1	Crocinitomicaceae	21	0	0	0	0	0	0	0	0	0	0	0	0	0	0	0	0	0	0	0	0	0	0	0	0	0	0	0	0	0	0	0	0	0	0	0	0	0	0	0	0	0	0	0	0	0	0
6	0.1.7.1.5.1.1	Brumimicrobium	1	0	0	0	0	0	0	0	0	0	0	0	0	0	0	0	0	0	0	0	0	0	0	0	0	0	0	0	0	0	0	0	0	0	0	0	0	0	0	0	0	0	0	0	0	0	0
6	0.1.7.1.5.1.2	Crocinitomicaceae_unclassified	5	0	0	0	0	0	0	0	0	0	0	0	0	0	0	0	0	0	0	0	0	0	0	0	0	0	0	0	0	0	0	0	0	0	0	0	0	0	0	0	0	0	0	0	0	0	0
6	0.1.7.1.5.1.3	Crocinitomix	3	0	0	0	0	0	0	0	0	0	0	0	0	0	0	0	0	0	0	0	0	0	0	0	0	0	0	0	0	0	0	0	0	0	0	0	0	0	0	0	0	0	0	0	0	0	0
6	0.1.7.1.5.1.4	Fluviicola	8	0	0	0	0	0	0	0	0	0	0	0	0	0	0	0	0	0	0	0	0	0	0	0	0	0	0	0	0	0	0	0	0	0	0	0	0	0	0	0	0	0	0	0	0	0	0
6	0.1.7.1.5.1.5	Wandonia	3	0	0	0	0	0	0	0	0	0	0	0	0	0	0	0	0	0	0	0	0	0	0	0	0	0	0	0	0	0	0	0	0	0	0	0	0	0	0	0	0	0	0	0	0	0	0
6	0.1.7.1.5.1.6	uncultured	1	0	0	0	0	0	0	0	0	0	0	0	0	0	0	0	0	0	0	0	0	0	0	0	0	0	0	0	0	0	0	0	0	0	0	0	0	0	0	0	0	0	0	0	0	0	0
5	0.1.7.1.5.2	Flavobacteriaceae	75	0	0	0	0	0	0	0	0	0	0	0	0	0	0	0	0	0	0	0	1	0	1	1	0	0	0	0	0	0	1	0	0	0	1	0	0	0	0	0	0	0	0	0	0	0	1
6	0.1.7.1.5.2.1	Antarcticimonas	2	0	0	0	0	0	0	0	0	0	0	0	0	0	0	0	0	0	0	0	0	0	0	0	0	0	0	0	0	0	0	0	0	0	0	0	0	0	0	0	0	0	0	0	0	0	0
6	0.1.7.1.5.2.2	Citreitalea	2	0	0	0	0	0	0	0	0	0	0	0	0	0	0	0	0	0	0	0	0	0	0	0	0	0	0	0	0	0	0	0	0	0	0	0	0	0	0	0	0	0	0	0	0	0	0
6	0.1.7.1.5.2.3	Flavobacteriaceae_unclassified	32	0	0	0	0	0	0	0	0	0	0	0	0	0	0	0	0	0	0	0	1	0	1	1	0	0	0	0	0	0	0	0	0	0	0	0	0	0	0	0	0	0	0	0	0	0	1
6	0.1.7.1.5.2.4	Flavobacterium	38	0	0	0	0	0	0	0	0	0	0	0	0	0	0	0	0	0	0	0	0	0	0	0	0	0	0	0	0	0	1	0	0	0	1	0	0	0	0	0	0	0	0	0	0	0	0
6	0.1.7.1.5.2.5	Leptobacterium	1	0	0	0	0	0	0	0	0	0	0	0	0	0	0	0	0	0	0	0	0	0	0	0	0	0	0	0	0	0	0	0	0	0	0	0	0	0	0	0	0	0	0	0	0	0	0
5	0.1.7.1.5.3	Flavobacteriales_unclassified	224	0	0	0	0	0	0	0	0	0	1	0	0	1	1	0	0	0	0	1	1	1	0	1	1	0	0	0	4	0	1	0	89	3	1	0	17	0	0	0	0	0	0	0	0	0	0
6	0.1.7.1.5.3.1	Flavobacteriales_unclassified	224	0	0	0	0	0	0	0	0	0	1	0	0	1	1	0	0	0	0	1	1	1	0	1	1	0	0	0	4	0	1	0	89	3	1	0	17	0	0	0	0	0	0	0	0	0	0
5	0.1.7.1.5.4	NS9_marine_group	26	0	0	0	0	0	0	0	0	0	0	0	0	0	0	0	0	0	0	1	0	0	0	0	0	0	0	0	0	0	0	0	0	0	0	0	0	0	0	0	0	0	0	0	0	0	0
6	0.1.7.1.5.4.1	NS9_marine_group_ge	26	0	0	0	0	0	0	0	0	0	0	0	0	0	0	0	0	0	0	1	0	0	0	0	0	0	0	0	0	0	0	0	0	0	0	0	0	0	0	0	0	0	0	0	0	0	0
5	0.1.7.1.5.5	Weeksellaceae	14	0	0	0	0	0	0	0	0	0	0	0	0	0	0	0	0	0	0	0	0	0	0	0	0	0	2	0	2	0	0	0	0	0	0	0	0	0	0	0	0	0	0	0	0	0	0
6	0.1.7.1.5.5.1	Bergeyella	3	0	0	0	0	0	0	0	0	0	0	0	0	0	0	0	0	0	0	0	0	0	0	0	0	0	2	0	0	0	0	0	0	0	0	0	0	0	0	0	0	0	0	0	0	0	0
6	0.1.7.1.5.5.2	Chryseobacterium	6	0	0	0	0	0	0	0	0	0	0	0	0	0	0	0	0	0	0	0	0	0	0	0	0	0	0	0	2	0	0	0	0	0	0	0	0	0	0	0	0	0	0	0	0	0	0
6	0.1.7.1.5.5.3	Cloacibacterium	1	0	0	0	0	0	0	0	0	0	0	0	0	0	0	0	0	0	0	0	0	0	0	0	0	0	0	0	0	0	0	0	0	0	0	0	0	0	0	0	0	0	0	0	0	0	0
6	0.1.7.1.5.5.4	Weeksellaceae_ge	1	0	0	0	0	0	0	0	0	0	0	0	0	0	0	0	0	0	0	0	0	0	0	0	0	0	0	0	0	0	0	0	0	0	0	0	0	0	0	0	0	0	0	0	0	0	0
6	0.1.7.1.5.5.5	Weeksellaceae_unclassified	3	0	0	0	0	0	0	0	0	0	0	0	0	0	0	0	0	0	0	0	0	0	0	0	0	0	0	0	0	0	0	0	0	0	0	0	0	0	0	0	0	0	0	0	0	0	0
4	0.1.7.1.6	Sphingobacteriales	3906	3	0	0	0	1	2	0	2	0	1	0	3	0	1	0	0	6	0	9	2	0	4	5	2	5	1	4	2	1	5	0	3	2	6	7	4	9	5	0	22	6	0	12	1	3	14
5	0.1.7.1.6.1	AKYH767	70	0	0	0	0	0	0	0	0	0	0	0	0	0	0	0	0	0	0	0	0	0	0	0	0	0	0	0	0	0	0	0	0	0	0	0	0	0	0	0	0	0	0	0	0	0	0
6	0.1.7.1.6.1.1	AKYH767_ge	70	0	0	0	0	0	0	0	0	0	0	0	0	0	0	0	0	0	0	0	0	0	0	0	0	0	0	0	0	0	0	0	0	0	0	0	0	0	0	0	0	0	0	0	0	0	0
5	0.1.7.1.6.2	CWT_CU03-E12	4	0	0	0	0	0	0	0	0	0	0	0	0	0	0	0	0	0	0	0	0	0	0	0	0	0	0	0	0	0	0	0	0	0	0	0	0	0	0	0	0	0	0	0	0	0	0
6	0.1.7.1.6.2.1	CWT_CU03-E12_ge	4	0	0	0	0	0	0	0	0	0	0	0	0	0	0	0	0	0	0	0	0	0	0	0	0	0	0	0	0	0	0	0	0	0	0	0	0	0	0	0	0	0	0	0	0	0	0
5	0.1.7.1.6.3	KD3-93	1	0	0	0	0	0	0	0	0	0	0	0	0	0	0	0	0	0	0	0	0	0	0	0	0	0	0	0	0	0	0	0	0	0	0	0	0	0	0	0	0	0	0	0	0	0	0
6	0.1.7.1.6.3.1	KD3-93_ge	1	0	0	0	0	0	0	0	0	0	0	0	0	0	0	0	0	0	0	0	0	0	0	0	0	0	0	0	0	0	0	0	0	0	0	0	0	0	0	0	0	0	0	0	0	0	0
5	0.1.7.1.6.4	LiUU-11-161	5	0	0	0	0	0	0	0	0	0	0	0	0	0	0	0	0	0	0	0	0	0	0	0	0	0	0	0	0	0	0	0	0	0	0	0	0	0	0	0	1	0	0	0	0	0	0
6	0.1.7.1.6.4.1	LiUU-11-161_ge	5	0	0	0	0	0	0	0	0	0	0	0	0	0	0	0	0	0	0	0	0	0	0	0	0	0	0	0	0	0	0	0	0	0	0	0	0	0	0	0	1	0	0	0	0	0	0
5	0.1.7.1.6.5	NS11-12_marine_group	4	0	0	0	0	0	0	0	0	0	0	0	0	0	0	0	0	0	0	0	0	0	0	0	0	0	0	0	0	0	0	0	0	0	0	0	0	0	0	0	0	0	0	0	0	0	0
6	0.1.7.1.6.5.1	NS11-12_marine_group_ge	4	0	0	0	0	0	0	0	0	0	0	0	0	0	0	0	0	0	0	0	0	0	0	0	0	0	0	0	0	0	0	0	0	0	0	0	0	0	0	0	0	0	0	0	0	0	0
5	0.1.7.1.6.6	S15-21	1	0	0	0	0	0	0	0	0	0	0	0	0	0	0	0	0	0	0	0	0	0	0	0	0	0	0	0	0	0	0	0	0	0	0	0	0	0	0	0	0	0	0	0	0	0	0
6	0.1.7.1.6.6.1	S15-21_ge	1	0	0	0	0	0	0	0	0	0	0	0	0	0	0	0	0	0	0	0	0	0	0	0	0	0	0	0	0	0	0	0	0	0	0	0	0	0	0	0	0	0	0	0	0	0	0
5	0.1.7.1.6.7	Sphingobacteriaceae	92	0	0	0	0	0	0	0	0	0	0	0	0	0	0	0	0	0	0	0	0	0	0	0	0	0	0	0	0	0	1	0	0	0	0	0	0	0	0	0	0	0	0	0	0	1	0
6	0.1.7.1.6.7.1	Anseongella	1	0	0	0	0	0	0	0	0	0	0	0	0	0	0	0	0	0	0	0	0	0	0	0	0	0	0	0	0	0	0	0	0	0	0	0	0	0	0	0	0	0	0	0	0	0	0
6	0.1.7.1.6.7.2	Mucilaginibacter	5	0	0	0	0	0	0	0	0	0	0	0	0	0	0	0	0	0	0	0	0	0	0	0	0	0	0	0	0	0	0	0	0	0	0	0	0	0	0	0	0	0	0	0	0	0	0
6	0.1.7.1.6.7.3	Nubsella	10	0	0	0	0	0	0	0	0	0	0	0	0	0	0	0	0	0	0	0	0	0	0	0	0	0	0	0	0	0	0	0	0	0	0	0	0	0	0	0	0	0	0	0	0	0	0
6	0.1.7.1.6.7.4	Pedobacter	8	0	0	0	0	0	0	0	0	0	0	0	0	0	0	0	0	0	0	0	0	0	0	0	0	0	0	0	0	0	1	0	0	0	0	0	0	0	0	0	0	0	0	0	0	1	0
6	0.1.7.1.6.7.5	Pelobium	1	0	0	0	0	0	0	0	0	0	0	0	0	0	0	0	0	0	0	0	0	0	0	0	0	0	0	0	0	0	0	0	0	0	0	0	0	0	0	0	0	0	0	0	0	0	0
6	0.1.7.1.6.7.6	Solitalea	5	0	0	0	0	0	0	0	0	0	0	0	0	0	0	0	0	0	0	0	0	0	0	0	0	0	0	0	0	0	0	0	0	0	0	0	0	0	0	0	0	0	0	0	0	0	0
6	0.1.7.1.6.7.7	Sphingobacteriaceae_ge	13	0	0	0	0	0	0	0	0	0	0	0	0	0	0	0	0	0	0	0	0	0	0	0	0	0	0	0	0	0	0	0	0	0	0	0	0	0	0	0	0	0	0	0	0	0	0
6	0.1.7.1.6.7.8	Sphingobacteriaceae_unclassified	48	0	0	0	0	0	0	0	0	0	0	0	0	0	0	0	0	0	0	0	0	0	0	0	0	0	0	0	0	0	0	0	0	0	0	0	0	0	0	0	0	0	0	0	0	0	0
6	0.1.7.1.6.7.9	Sphingobacterium	1	0	0	0	0	0	0	0	0	0	0	0	0	0	0	0	0	0	0	0	0	0	0	0	0	0	0	0	0	0	0	0	0	0	0	0	0	0	0	0	0	0	0	0	0	0	0
5	0.1.7.1.6.8	Sphingobacteriales_fa	1	0	0	0	0	0	0	0	0	0	0	0	0	0	0	0	0	0	0	0	0	0	0	0	0	0	0	0	0	0	0	0	0	0	0	0	0	0	0	0	0	0	0	0	0	0	0
6	0.1.7.1.6.8.1	Sphingobacteriales_ge	1	0	0	0	0	0	0	0	0	0	0	0	0	0	0	0	0	0	0	0	0	0	0	0	0	0	0	0	0	0	0	0	0	0	0	0	0	0	0	0	0	0	0	0	0	0	0
5	0.1.7.1.6.9	Sphingobacteriales_unclassified	2015	3	0	0	0	1	1	0	1	0	1	0	3	0	1	0	0	5	0	2	2	0	4	5	2	4	0	3	2	1	2	0	0	0	5	3	4	4	3	0	13	6	0	9	1	2	14
6	0.1.7.1.6.9.1	Sphingobacteriales_unclassified	2015	3	0	0	0	1	1	0	1	0	1	0	3	0	1	0	0	5	0	2	2	0	4	5	2	4	0	3	2	1	2	0	0	0	5	3	4	4	3	0	13	6	0	9	1	2	14
5	0.1.7.1.6.10	Z4MB62	1	0	0	0	0	0	0	0	0	0	0	0	0	0	0	0	0	0	0	0	0	0	0	0	0	0	0	0	0	0	0	0	0	0	0	0	0	0	0	0	0	0	0	0	0	0	0
6	0.1.7.1.6.10.1	Z4MB62_ge	1	0	0	0	0	0	0	0	0	0	0	0	0	0	0	0	0	0	0	0	0	0	0	0	0	0	0	0	0	0	0	0	0	0	0	0	0	0	0	0	0	0	0	0	0	0	0
5	0.1.7.1.6.11	env.OPS_17	1712	0	0	0	0	0	1	0	1	0	0	0	0	0	0	0	0	1	0	7	0	0	0	0	0	1	1	1	0	0	2	0	3	2	1	4	0	5	2	0	8	0	0	3	0	0	0
6	0.1.7.1.6.11.1	env.OPS_17_ge	1712	0	0	0	0	0	1	0	1	0	0	0	0	0	0	0	0	1	0	7	0	0	0	0	0	1	1	1	0	0	2	0	3	2	1	4	0	5	2	0	8	0	0	3	0	0	0
3	0.1.7.2	Bacteroidota_unclassified	2746	20	0	0	0	15	25	7	56	0	20	0	6	14	8	12	9	70	0	32	15	67	9	6	15	27	126	12	76	10	52	0	34	18	17	4	106	6	1	0	7	1	0	3	0	0	5
4	0.1.7.2.1	Bacteroidota_unclassified	2746	20	0	0	0	15	25	7	56	0	20	0	6	14	8	12	9	70	0	32	15	67	9	6	15	27	126	12	76	10	52	0	34	18	17	4	106	6	1	0	7	1	0	3	0	0	5
5	0.1.7.2.1.1	Bacteroidota_unclassified	2746	20	0	0	0	15	25	7	56	0	20	0	6	14	8	12	9	70	0	32	15	67	9	6	15	27	126	12	76	10	52	0	34	18	17	4	106	6	1	0	7	1	0	3	0	0	5
6	0.1.7.2.1.1.1	Bacteroidota_unclassified	2746	20	0	0	0	15	25	7	56	0	20	0	6	14	8	12	9	70	0	32	15	67	9	6	15	27	126	12	76	10	52	0	34	18	17	4	106	6	1	0	7	1	0	3	0	0	5
3	0.1.7.3	Ignavibacteria	147	0	0	0	0	0	0	1	0	0	0	0	0	0	0	0	0	0	0	0	0	0	0	0	0	0	0	0	0	0	0	0	0	0	0	1	0	0	3	0	1	0	0	0	0	0	2
4	0.1.7.3.1	Ignavibacteria_unclassified	4	0	0	0	0	0	0	0	0	0	0	0	0	0	0	0	0	0	0	0	0	0	0	0	0	0	0	0	0	0	0	0	0	0	0	0	0	0	0	0	0	0	0	0	0	0	0
5	0.1.7.3.1.1	Ignavibacteria_unclassified	4	0	0	0	0	0	0	0	0	0	0	0	0	0	0	0	0	0	0	0	0	0	0	0	0	0	0	0	0	0	0	0	0	0	0	0	0	0	0	0	0	0	0	0	0	0	0
6	0.1.7.3.1.1.1	Ignavibacteria_unclassified	4	0	0	0	0	0	0	0	0	0	0	0	0	0	0	0	0	0	0	0	0	0	0	0	0	0	0	0	0	0	0	0	0	0	0	0	0	0	0	0	0	0	0	0	0	0	0
4	0.1.7.3.2	Ignavibacteriales	75	0	0	0	0	0	0	0	0	0	0	0	0	0	0	0	0	0	0	0	0	0	0	0	0	0	0	0	0	0	0	0	0	0	0	0	0	0	3	0	1	0	0	0	0	0	2
5	0.1.7.3.2.1	BSN166	40	0	0	0	0	0	0	0	0	0	0	0	0	0	0	0	0	0	0	0	0	0	0	0	0	0	0	0	0	0	0	0	0	0	0	0	0	0	3	0	0	0	0	0	0	0	1
6	0.1.7.3.2.1.1	BSN166_ge	40	0	0	0	0	0	0	0	0	0	0	0	0	0	0	0	0	0	0	0	0	0	0	0	0	0	0	0	0	0	0	0	0	0	0	0	0	0	3	0	0	0	0	0	0	0	1
5	0.1.7.3.2.2	Ignavibacteriales_unclassified	35	0	0	0	0	0	0	0	0	0	0	0	0	0	0	0	0	0	0	0	0	0	0	0	0	0	0	0	0	0	0	0	0	0	0	0	0	0	0	0	1	0	0	0	0	0	1
6	0.1.7.3.2.2.1	Ignavibacteriales_unclassified	35	0	0	0	0	0	0	0	0	0	0	0	0	0	0	0	0	0	0	0	0	0	0	0	0	0	0	0	0	0	0	0	0	0	0	0	0	0	0	0	1	0	0	0	0	0	1
4	0.1.7.3.3	SJA-28	68	0	0	0	0	0	0	1	0	0	0	0	0	0	0	0	0	0	0	0	0	0	0	0	0	0	0	0	0	0	0	0	0	0	0	1	0	0	0	0	0	0	0	0	0	0	0
5	0.1.7.3.3.1	SJA-28_fa	68	0	0	0	0	0	0	1	0	0	0	0	0	0	0	0	0	0	0	0	0	0	0	0	0	0	0	0	0	0	0	0	0	0	0	1	0	0	0	0	0	0	0	0	0	0	0
6	0.1.7.3.3.1.1	SJA-28_ge	68	0	0	0	0	0	0	1	0	0	0	0	0	0	0	0	0	0	0	0	0	0	0	0	0	0	0	0	0	0	0	0	0	0	0	1	0	0	0	0	0	0	0	0	0	0	0
3	0.1.7.4	Kapabacteria	7	0	0	0	0	0	0	0	0	0	0	0	0	0	0	0	0	0	0	0	0	0	0	0	0	0	0	0	0	0	0	0	0	0	0	0	0	0	0	0	0	0	0	0	0	0	0
4	0.1.7.4.1	Kapabacteriales	7	0	0	0	0	0	0	0	0	0	0	0	0	0	0	0	0	0	0	0	0	0	0	0	0	0	0	0	0	0	0	0	0	0	0	0	0	0	0	0	0	0	0	0	0	0	0
5	0.1.7.4.1.1	Kapabacteriales_fa	7	0	0	0	0	0	0	0	0	0	0	0	0	0	0	0	0	0	0	0	0	0	0	0	0	0	0	0	0	0	0	0	0	0	0	0	0	0	0	0	0	0	0	0	0	0	0
6	0.1.7.4.1.1.1	Kapabacteriales_ge	7	0	0	0	0	0	0	0	0	0	0	0	0	0	0	0	0	0	0	0	0	0	0	0	0	0	0	0	0	0	0	0	0	0	0	0	0	0	0	0	0	0	0	0	0	0	0
3	0.1.7.5	Kryptonia	340	0	0	0	0	0	0	0	0	0	0	0	0	0	0	0	0	1	0	2	0	0	0	0	0	0	1	0	0	0	0	0	0	0	0	1	0	0	0	0	0	0	0	5	0	0	5
4	0.1.7.5.1	Kryptoniales	340	0	0	0	0	0	0	0	0	0	0	0	0	0	0	0	0	1	0	2	0	0	0	0	0	0	1	0	0	0	0	0	0	0	0	1	0	0	0	0	0	0	0	5	0	0	5
5	0.1.7.5.1.1	BSV26	335	0	0	0	0	0	0	0	0	0	0	0	0	0	0	0	0	1	0	2	0	0	0	0	0	0	1	0	0	0	0	0	0	0	0	1	0	0	0	0	0	0	0	5	0	0	5
6	0.1.7.5.1.1.1	BSV26_ge	335	0	0	0	0	0	0	0	0	0	0	0	0	0	0	0	0	1	0	2	0	0	0	0	0	0	1	0	0	0	0	0	0	0	0	1	0	0	0	0	0	0	0	5	0	0	5
5	0.1.7.5.1.2	Kryptoniaceae	1	0	0	0	0	0	0	0	0	0	0	0	0	0	0	0	0	0	0	0	0	0	0	0	0	0	0	0	0	0	0	0	0	0	0	0	0	0	0	0	0	0	0	0	0	0	0
6	0.1.7.5.1.2.1	Kryptoniaceae_unclassified	1	0	0	0	0	0	0	0	0	0	0	0	0	0	0	0	0	0	0	0	0	0	0	0	0	0	0	0	0	0	0	0	0	0	0	0	0	0	0	0	0	0	0	0	0	0	0
5	0.1.7.5.1.3	Kryptoniales_unclassified	4	0	0	0	0	0	0	0	0	0	0	0	0	0	0	0	0	0	0	0	0	0	0	0	0	0	0	0	0	0	0	0	0	0	0	0	0	0	0	0	0	0	0	0	0	0	0
6	0.1.7.5.1.3.1	Kryptoniales_unclassified	4	0	0	0	0	0	0	0	0	0	0	0	0	0	0	0	0	0	0	0	0	0	0	0	0	0	0	0	0	0	0	0	0	0	0	0	0	0	0	0	0	0	0	0	0	0	0
2	0.1.8	Bdellovibrionota	5933	0	0	0	0	2	3	2	2	0	0	0	1	0	0	8	1	9	0	4	1	0	4	0	5	10	3	6	6	6	12	0	16	4	1	12	5	18	1	0	18	0	0	3	2	1	6
3	0.1.8.1	Bdellovibrionia	2208	0	0	0	0	2	3	1	2	0	0	0	0	0	0	2	0	7	0	2	0	0	0	0	0	2	1	1	1	4	6	0	2	0	1	2	0	1	1	0	6	0	0	0	0	1	5
4	0.1.8.1.1	Bacteriovoracales	31	0	0	0	0	0	0	0	0	0	0	0	0	0	0	0	0	0	0	0	0	0	0	0	0	0	0	0	0	0	0	0	0	0	0	0	0	0	0	0	4	0	0	0	0	0	0
5	0.1.8.1.1.1	Bacteriovoracaceae	31	0	0	0	0	0	0	0	0	0	0	0	0	0	0	0	0	0	0	0	0	0	0	0	0	0	0	0	0	0	0	0	0	0	0	0	0	0	0	0	4	0	0	0	0	0	0
6	0.1.8.1.1.1.1	Bacteriovorax	8	0	0	0	0	0	0	0	0	0	0	0	0	0	0	0	0	0	0	0	0	0	0	0	0	0	0	0	0	0	0	0	0	0	0	0	0	0	0	0	0	0	0	0	0	0	0
6	0.1.8.1.1.1.2	Peredibacter	23	0	0	0	0	0	0	0	0	0	0	0	0	0	0	0	0	0	0	0	0	0	0	0	0	0	0	0	0	0	0	0	0	0	0	0	0	0	0	0	4	0	0	0	0	0	0
4	0.1.8.1.2	Bdellovibrionales	2176	0	0	0	0	2	3	1	2	0	0	0	0	0	0	2	0	7	0	2	0	0	0	0	0	2	1	1	1	4	6	0	2	0	1	2	0	1	1	0	2	0	0	0	0	1	5
5	0.1.8.1.2.1	Bdellovibrionaceae	2176	0	0	0	0	2	3	1	2	0	0	0	0	0	0	2	0	7	0	2	0	0	0	0	0	2	1	1	1	4	6	0	2	0	1	2	0	1	1	0	2	0	0	0	0	1	5
6	0.1.8.1.2.1.1	Bdellovibrio	207	0	0	0	0	0	0	0	0	0	0	0	0	0	0	0	0	2	0	0	0	0	0	0	0	0	0	0	0	0	1	0	0	0	0	1	0	1	1	0	0	0	0	0	0	1	4
6	0.1.8.1.2.1.2	Bdellovibrionaceae_unclassified	1	0	0	0	0	0	0	0	0	0	0	0	0	0	0	0	0	0	0	0	0	0	0	0	0	0	0	0	0	0	0	0	0	0	0	0	0	0	0	0	0	0	0	0	0	0	0
6	0.1.8.1.2.1.3	OM27_clade	1968	0	0	0	0	2	3	1	2	0	0	0	0	0	0	2	0	5	0	2	0	0	0	0	0	2	1	1	1	4	5	0	2	0	1	1	0	0	0	0	2	0	0	0	0	0	1
4	0.1.8.1.3	Bdellovibrionia_unclassified	1	0	0	0	0	0	0	0	0	0	0	0	0	0	0	0	0	0	0	0	0	0	0	0	0	0	0	0	0	0	0	0	0	0	0	0	0	0	0	0	0	0	0	0	0	0	0
5	0.1.8.1.3.1	Bdellovibrionia_unclassified	1	0	0	0	0	0	0	0	0	0	0	0	0	0	0	0	0	0	0	0	0	0	0	0	0	0	0	0	0	0	0	0	0	0	0	0	0	0	0	0	0	0	0	0	0	0	0
6	0.1.8.1.3.1.1	Bdellovibrionia_unclassified	1	0	0	0	0	0	0	0	0	0	0	0	0	0	0	0	0	0	0	0	0	0	0	0	0	0	0	0	0	0	0	0	0	0	0	0	0	0	0	0	0	0	0	0	0	0	0
3	0.1.8.2	Bdellovibrionota_unclassified	606	0	0	0	0	0	0	1	0	0	0	0	1	0	0	6	0	1	0	0	1	0	4	0	3	4	1	3	2	0	3	0	7	0	0	6	3	0	0	0	0	0	0	0	0	0	0
4	0.1.8.2.1	Bdellovibrionota_unclassified	606	0	0	0	0	0	0	1	0	0	0	0	1	0	0	6	0	1	0	0	1	0	4	0	3	4	1	3	2	0	3	0	7	0	0	6	3	0	0	0	0	0	0	0	0	0	0
5	0.1.8.2.1.1	Bdellovibrionota_unclassified	606	0	0	0	0	0	0	1	0	0	0	0	1	0	0	6	0	1	0	0	1	0	4	0	3	4	1	3	2	0	3	0	7	0	0	6	3	0	0	0	0	0	0	0	0	0	0
6	0.1.8.2.1.1.1	Bdellovibrionota_unclassified	606	0	0	0	0	0	0	1	0	0	0	0	1	0	0	6	0	1	0	0	1	0	4	0	3	4	1	3	2	0	3	0	7	0	0	6	3	0	0	0	0	0	0	0	0	0	0
3	0.1.8.3	Oligoflexia	3119	0	0	0	0	0	0	0	0	0	0	0	0	0	0	0	1	1	0	2	0	0	0	0	2	4	1	2	3	2	3	0	7	4	0	4	2	17	0	0	12	0	0	3	2	0	1
4	0.1.8.3.1	0319-6G20	3075	0	0	0	0	0	0	0	0	0	0	0	0	0	0	0	1	1	0	2	0	0	0	0	2	4	1	2	3	2	2	0	6	4	0	4	2	17	0	0	11	0	0	3	2	0	1
5	0.1.8.3.1.1	0319-6G20_fa	3075	0	0	0	0	0	0	0	0	0	0	0	0	0	0	0	1	1	0	2	0	0	0	0	2	4	1	2	3	2	2	0	6	4	0	4	2	17	0	0	11	0	0	3	2	0	1
6	0.1.8.3.1.1.1	0319-6G20_ge	3075	0	0	0	0	0	0	0	0	0	0	0	0	0	0	0	1	1	0	2	0	0	0	0	2	4	1	2	3	2	2	0	6	4	0	4	2	17	0	0	11	0	0	3	2	0	1
4	0.1.8.3.2	Oligoflexales	9	0	0	0	0	0	0	0	0	0	0	0	0	0	0	0	0	0	0	0	0	0	0	0	0	0	0	0	0	0	0	0	0	0	0	0	0	0	0	0	0	0	0	0	0	0	0
5	0.1.8.3.2.1	Oligoflexaceae	9	0	0	0	0	0	0	0	0	0	0	0	0	0	0	0	0	0	0	0	0	0	0	0	0	0	0	0	0	0	0	0	0	0	0	0	0	0	0	0	0	0	0	0	0	0	0
6	0.1.8.3.2.1.1	Oligoflexaceae_ge	1	0	0	0	0	0	0	0	0	0	0	0	0	0	0	0	0	0	0	0	0	0	0	0	0	0	0	0	0	0	0	0	0	0	0	0	0	0	0	0	0	0	0	0	0	0	0
6	0.1.8.3.2.1.2	Oligoflexus	4	0	0	0	0	0	0	0	0	0	0	0	0	0	0	0	0	0	0	0	0	0	0	0	0	0	0	0	0	0	0	0	0	0	0	0	0	0	0	0	0	0	0	0	0	0	0
6	0.1.8.3.2.1.3	uncultured	4	0	0	0	0	0	0	0	0	0	0	0	0	0	0	0	0	0	0	0	0	0	0	0	0	0	0	0	0	0	0	0	0	0	0	0	0	0	0	0	0	0	0	0	0	0	0
4	0.1.8.3.3	Oligoflexia_unclassified	35	0	0	0	0	0	0	0	0	0	0	0	0	0	0	0	0	0	0	0	0	0	0	0	0	0	0	0	0	0	1	0	1	0	0	0	0	0	0	0	1	0	0	0	0	0	0
5	0.1.8.3.3.1	Oligoflexia_unclassified	35	0	0	0	0	0	0	0	0	0	0	0	0	0	0	0	0	0	0	0	0	0	0	0	0	0	0	0	0	0	1	0	1	0	0	0	0	0	0	0	1	0	0	0	0	0	0
6	0.1.8.3.3.1.1	Oligoflexia_unclassified	35	0	0	0	0	0	0	0	0	0	0	0	0	0	0	0	0	0	0	0	0	0	0	0	0	0	0	0	0	0	1	0	1	0	0	0	0	0	0	0	1	0	0	0	0	0	0
2	0.1.9	Calditrichota	2	0	0	0	0	0	0	0	0	0	0	0	0	0	0	0	0	0	0	0	0	0	0	0	0	0	0	0	0	0	0	0	0	0	0	0	0	0	0	0	0	0	0	0	0	0	0
3	0.1.9.1	Calditrichia	2	0	0	0	0	0	0	0	0	0	0	0	0	0	0	0	0	0	0	0	0	0	0	0	0	0	0	0	0	0	0	0	0	0	0	0	0	0	0	0	0	0	0	0	0	0	0
4	0.1.9.1.1	Calditrichales	2	0	0	0	0	0	0	0	0	0	0	0	0	0	0	0	0	0	0	0	0	0	0	0	0	0	0	0	0	0	0	0	0	0	0	0	0	0	0	0	0	0	0	0	0	0	0
5	0.1.9.1.1.1	Calditrichaceae	2	0	0	0	0	0	0	0	0	0	0	0	0	0	0	0	0	0	0	0	0	0	0	0	0	0	0	0	0	0	0	0	0	0	0	0	0	0	0	0	0	0	0	0	0	0	0
6	0.1.9.1.1.1.1	Calditrichaceae_unclassified	1	0	0	0	0	0	0	0	0	0	0	0	0	0	0	0	0	0	0	0	0	0	0	0	0	0	0	0	0	0	0	0	0	0	0	0	0	0	0	0	0	0	0	0	0	0	0
6	0.1.9.1.1.1.2	JdFR-76	1	0	0	0	0	0	0	0	0	0	0	0	0	0	0	0	0	0	0	0	0	0	0	0	0	0	0	0	0	0	0	0	0	0	0	0	0	0	0	0	0	0	0	0	0	0	0
2	0.1.10	Campylobacterota	59184	1	0	1	0	0	1	0	3	0	1	0	0	0	0	4	1	10	0	3	5	2	2	2	6	3	5	2	2	5	39	0	21	8	8	1	6	25	10	0	28	1	0	14	2	7	18
3	0.1.10.1	Campylobacteria	59148	1	0	1	0	0	1	0	3	0	1	0	0	0	0	4	1	10	0	3	5	2	2	2	6	3	5	2	2	5	39	0	21	8	8	1	6	25	10	0	28	1	0	14	2	7	18
4	0.1.10.1.1	Campylobacterales	59144	1	0	1	0	0	1	0	3	0	1	0	0	0	0	4	1	10	0	3	5	2	2	2	6	3	5	2	2	5	39	0	21	8	8	1	6	25	10	0	28	1	0	14	2	7	18
5	0.1.10.1.1.1	CH8-1-BAC	481	0	0	0	0	0	1	0	0	0	0	0	0	0	0	1	0	0	0	0	0	0	0	0	0	0	0	0	0	0	0	0	0	0	0	0	2	14	2	0	2	0	0	1	0	0	5
6	0.1.10.1.1.1.1	CH8-1-BAC_ge	481	0	0	0	0	0	1	0	0	0	0	0	0	0	0	1	0	0	0	0	0	0	0	0	0	0	0	0	0	0	0	0	0	0	0	0	2	14	2	0	2	0	0	1	0	0	5
5	0.1.10.1.1.2	Campylobacteraceae	26495	1	0	0	0	0	0	0	1	0	1	0	0	0	0	3	0	10	0	0	5	2	2	2	6	3	5	2	2	4	39	0	15	5	8	1	4	4	2	0	6	1	0	1	0	2	3
6	0.1.10.1.1.2.1	Campylobacter	26495	1	0	0	0	0	0	0	1	0	1	0	0	0	0	3	0	10	0	0	5	2	2	2	6	3	5	2	2	4	39	0	15	5	8	1	4	4	2	0	6	1	0	1	0	2	3
5	0.1.10.1.1.3	Campylobacterales_unclassified	907	0	0	0	0	0	0	0	1	0	0	0	0	0	0	0	0	0	0	0	0	0	0	0	0	0	0	0	0	1	0	0	0	0	0	0	0	3	4	0	10	0	0	11	2	2	6
6	0.1.10.1.1.3.1	Campylobacterales_unclassified	907	0	0	0	0	0	0	0	1	0	0	0	0	0	0	0	0	0	0	0	0	0	0	0	0	0	0	0	0	1	0	0	0	0	0	0	0	3	4	0	10	0	0	11	2	2	6
5	0.1.10.1.1.4	Helicobacteraceae	31072	0	0	1	0	0	0	0	1	0	0	0	0	0	0	0	1	0	0	3	0	0	0	0	0	0	0	0	0	0	0	0	6	3	0	0	0	4	2	0	4	0	0	1	0	3	4
6	0.1.10.1.1.4.1	Helicobacter	30461	0	0	0	0	0	0	0	0	0	0	0	0	0	0	0	0	0	0	3	0	0	0	0	0	0	0	0	0	0	0	0	6	3	0	0	0	4	2	0	4	0	0	1	0	3	4
6	0.1.10.1.1.4.2	Helicobacteraceae_unclassified	351	0	0	1	0	0	0	0	1	0	0	0	0	0	0	0	1	0	0	0	0	0	0	0	0	0	0	0	0	0	0	0	0	0	0	0	0	0	0	0	0	0	0	0	0	0	0
6	0.1.10.1.1.4.3	Wolinella	260	0	0	0	0	0	0	0	0	0	0	0	0	0	0	0	0	0	0	0	0	0	0	0	0	0	0	0	0	0	0	0	0	0	0	0	0	0	0	0	0	0	0	0	0	0	0
5	0.1.10.1.1.5	P6-b51	182	0	0	0	0	0	0	0	0	0	0	0	0	0	0	0	0	0	0	0	0	0	0	0	0	0	0	0	0	0	0	0	0	0	0	0	0	0	0	0	0	0	0	0	0	0	0
6	0.1.10.1.1.5.1	P6-b51_ge	182	0	0	0	0	0	0	0	0	0	0	0	0	0	0	0	0	0	0	0	0	0	0	0	0	0	0	0	0	0	0	0	0	0	0	0	0	0	0	0	0	0	0	0	0	0	0
5	0.1.10.1.1.6	Sulfurimonadaceae	7	0	0	0	0	0	0	0	0	0	0	0	0	0	0	0	0	0	0	0	0	0	0	0	0	0	0	0	0	0	0	0	0	0	0	0	0	0	0	0	6	0	0	0	0	0	0
6	0.1.10.1.1.6.1	Sulfurimonadaceae_unclassified	7	0	0	0	0	0	0	0	0	0	0	0	0	0	0	0	0	0	0	0	0	0	0	0	0	0	0	0	0	0	0	0	0	0	0	0	0	0	0	0	6	0	0	0	0	0	0
4	0.1.10.1.2	Campylobacteria_unclassified	4	0	0	0	0	0	0	0	0	0	0	0	0	0	0	0	0	0	0	0	0	0	0	0	0	0	0	0	0	0	0	0	0	0	0	0	0	0	0	0	0	0	0	0	0	0	0
5	0.1.10.1.2.1	Campylobacteria_unclassified	4	0	0	0	0	0	0	0	0	0	0	0	0	0	0	0	0	0	0	0	0	0	0	0	0	0	0	0	0	0	0	0	0	0	0	0	0	0	0	0	0	0	0	0	0	0	0
6	0.1.10.1.2.1.1	Campylobacteria_unclassified	4	0	0	0	0	0	0	0	0	0	0	0	0	0	0	0	0	0	0	0	0	0	0	0	0	0	0	0	0	0	0	0	0	0	0	0	0	0	0	0	0	0	0	0	0	0	0
3	0.1.10.2	Campylobacterota_unclassified	36	0	0	0	0	0	0	0	0	0	0	0	0	0	0	0	0	0	0	0	0	0	0	0	0	0	0	0	0	0	0	0	0	0	0	0	0	0	0	0	0	0	0	0	0	0	0
4	0.1.10.2.1	Campylobacterota_unclassified	36	0	0	0	0	0	0	0	0	0	0	0	0	0	0	0	0	0	0	0	0	0	0	0	0	0	0	0	0	0	0	0	0	0	0	0	0	0	0	0	0	0	0	0	0	0	0
5	0.1.10.2.1.1	Campylobacterota_unclassified	36	0	0	0	0	0	0	0	0	0	0	0	0	0	0	0	0	0	0	0	0	0	0	0	0	0	0	0	0	0	0	0	0	0	0	0	0	0	0	0	0	0	0	0	0	0	0
6	0.1.10.2.1.1.1	Campylobacterota_unclassified	36	0	0	0	0	0	0	0	0	0	0	0	0	0	0	0	0	0	0	0	0	0	0	0	0	0	0	0	0	0	0	0	0	0	0	0	0	0	0	0	0	0	0	0	0	0	0
2	0.1.11	Chloroflexi	85737	1	0	2	2	22	63	65	53	0	16	0	40	16	24	50	24	184	0	718	147	90	148	51	108	61	153	103	248	115	444	0	548	181	166	236	168	156	207	0	260	19	0	215	61	9	157
3	0.1.11.1	Anaerolineae	46056	1	0	1	1	17	39	55	32	0	13	0	27	9	10	28	12	139	0	636	134	84	133	48	58	32	134	64	172	53	352	0	410	139	145	126	117	75	79	0	115	19	0	88	33	3	80
4	0.1.11.1.1	Anaerolineae_or	5	0	0	0	0	0	0	0	0	0	0	0	0	0	0	0	0	0	0	0	0	0	0	0	0	0	0	0	0	0	0	0	0	0	0	0	0	0	0	0	0	0	0	0	1	0	0
5	0.1.11.1.1.1	Anaerolineae_fa	5	0	0	0	0	0	0	0	0	0	0	0	0	0	0	0	0	0	0	0	0	0	0	0	0	0	0	0	0	0	0	0	0	0	0	0	0	0	0	0	0	0	0	0	1	0	0
6	0.1.11.1.1.1.1	Anaerolineae_ge	5	0	0	0	0	0	0	0	0	0	0	0	0	0	0	0	0	0	0	0	0	0	0	0	0	0	0	0	0	0	0	0	0	0	0	0	0	0	0	0	0	0	0	0	1	0	0
4	0.1.11.1.2	Anaerolineae_unclassified	10951	0	0	0	0	0	4	2	6	0	0	0	3	4	3	12	3	12	0	10	3	0	3	5	14	10	1	3	10	11	18	0	30	10	6	10	6	9	18	0	17	5	0	16	12	0	29
5	0.1.11.1.2.1	Anaerolineae_unclassified	10951	0	0	0	0	0	4	2	6	0	0	0	3	4	3	12	3	12	0	10	3	0	3	5	14	10	1	3	10	11	18	0	30	10	6	10	6	9	18	0	17	5	0	16	12	0	29
6	0.1.11.1.2.1.1	Anaerolineae_unclassified	10951	0	0	0	0	0	4	2	6	0	0	0	3	4	3	12	3	12	0	10	3	0	3	5	14	10	1	3	10	11	18	0	30	10	6	10	6	9	18	0	17	5	0	16	12	0	29
4	0.1.11.1.3	Anaerolineales	13960	1	0	0	1	10	26	45	17	0	12	0	17	4	4	12	3	92	0	581	127	80	118	43	33	12	112	46	132	20	266	0	300	107	126	45	90	27	24	0	32	8	0	29	4	1	28
5	0.1.11.1.3.1	Anaerolineaceae	13960	1	0	0	1	10	26	45	17	0	12	0	17	4	4	12	3	92	0	581	127	80	118	43	33	12	112	46	132	20	266	0	300	107	126	45	90	27	24	0	32	8	0	29	4	1	28
6	0.1.11.1.3.1.1	Anaerolineaceae_unclassified	1798	0	0	0	0	1	0	0	0	0	0	0	0	1	0	0	0	1	0	6	1	2	0	0	0	0	0	2	7	1	5	0	3	2	1	0	3	19	5	0	8	8	0	11	1	0	16
6	0.1.11.1.3.1.2	Flexilinea	2553	1	0	0	1	4	8	44	5	0	12	0	13	2	1	2	2	68	0	557	123	78	99	43	19	6	110	18	102	10	237	0	248	98	118	13	71	0	0	0	2	0	0	1	0	0	1
6	0.1.11.1.3.1.3	Ornatilinea	155	0	0	0	0	0	0	0	0	0	0	0	0	0	0	0	0	0	0	0	0	0	0	0	0	0	0	0	0	0	0	0	0	0	0	0	0	2	3	0	10	0	0	0	0	0	0
6	0.1.11.1.3.1.4	UTCFX1	9301	0	0	0	0	5	18	1	11	0	0	0	4	1	3	9	1	23	0	18	2	0	19	0	14	6	2	26	23	9	24	0	48	7	7	32	16	6	16	0	12	0	0	15	3	1	11
6	0.1.11.1.3.1.5	uncultured	153	0	0	0	0	0	0	0	1	0	0	0	0	0	0	1	0	0	0	0	1	0	0	0	0	0	0	0	0	0	0	0	1	0	0	0	0	0	0	0	0	0	0	2	0	0	0
4	0.1.11.1.4	Ardenticatenales	1160	0	0	0	0	0	3	0	5	0	0	0	0	0	0	0	0	4	0	2	0	0	1	0	2	0	4	2	1	0	4	0	13	2	1	0	1	0	5	0	4	6	0	0	0	0	2
5	0.1.11.1.4.1	Ardenticatenaceae	17	0	0	0	0	0	0	0	0	0	0	0	0	0	0	0	0	0	0	0	0	0	0	0	0	0	0	0	0	0	0	0	0	0	0	0	0	0	2	0	0	0	0	0	0	0	0
6	0.1.11.1.4.1.1	uncultured	17	0	0	0	0	0	0	0	0	0	0	0	0	0	0	0	0	0	0	0	0	0	0	0	0	0	0	0	0	0	0	0	0	0	0	0	0	0	2	0	0	0	0	0	0	0	0
5	0.1.11.1.4.2	Ardenticatenales_unclassified	2	0	0	0	0	0	0	0	0	0	0	0	0	0	0	0	0	0	0	0	0	0	0	0	0	0	0	0	0	0	0	0	0	0	0	0	0	0	0	0	0	0	0	0	0	0	0
6	0.1.11.1.4.2.1	Ardenticatenales_unclassified	2	0	0	0	0	0	0	0	0	0	0	0	0	0	0	0	0	0	0	0	0	0	0	0	0	0	0	0	0	0	0	0	0	0	0	0	0	0	0	0	0	0	0	0	0	0	0
5	0.1.11.1.4.3	uncultured	1141	0	0	0	0	0	3	0	5	0	0	0	0	0	0	0	0	4	0	2	0	0	1	0	2	0	4	2	1	0	4	0	13	2	1	0	1	0	3	0	4	6	0	0	0	0	2
6	0.1.11.1.4.3.1	uncultured_ge	1141	0	0	0	0	0	3	0	5	0	0	0	0	0	0	0	0	4	0	2	0	0	1	0	2	0	4	2	1	0	4	0	13	2	1	0	1	0	3	0	4	6	0	0	0	0	2
4	0.1.11.1.5	C10-SB1A	2	0	0	0	0	0	0	0	0	0	0	0	0	0	0	0	0	0	0	0	0	0	0	0	0	0	0	0	0	0	0	0	0	0	0	0	0	0	0	0	0	0	0	0	0	0	0
5	0.1.11.1.5.1	C10-SB1A_fa	2	0	0	0	0	0	0	0	0	0	0	0	0	0	0	0	0	0	0	0	0	0	0	0	0	0	0	0	0	0	0	0	0	0	0	0	0	0	0	0	0	0	0	0	0	0	0
6	0.1.11.1.5.1.1	C10-SB1A_ge	2	0	0	0	0	0	0	0	0	0	0	0	0	0	0	0	0	0	0	0	0	0	0	0	0	0	0	0	0	0	0	0	0	0	0	0	0	0	0	0	0	0	0	0	0	0	0
4	0.1.11.1.6	Caldilineales	1646	0	0	0	0	2	2	1	0	0	0	0	0	0	2	1	1	0	0	5	0	0	4	0	2	1	1	1	3	2	4	0	5	2	1	17	0	5	1	0	3	0	0	4	10	0	8
5	0.1.11.1.6.1	Caldilineaceae	1646	0	0	0	0	2	2	1	0	0	0	0	0	0	2	1	1	0	0	5	0	0	4	0	2	1	1	1	3	2	4	0	5	2	1	17	0	5	1	0	3	0	0	4	10	0	8
6	0.1.11.1.6.1.1	Caldilinea	2	0	0	0	0	0	0	0	0	0	0	0	0	0	0	0	0	0	0	0	0	0	0	0	0	0	0	0	0	0	0	0	0	0	0	0	0	0	0	0	0	0	0	0	0	0	0
6	0.1.11.1.6.1.2	Caldilineaceae_unclassified	166	0	0	0	0	0	0	1	0	0	0	0	0	0	0	0	0	0	0	0	0	0	0	0	0	1	0	0	0	0	0	0	0	0	0	5	0	1	1	0	0	0	0	0	8	0	0
6	0.1.11.1.6.1.3	Litorilinea	1070	0	0	0	0	0	1	0	0	0	0	0	0	0	2	0	1	0	0	4	0	0	4	0	2	0	1	0	0	2	4	0	3	2	1	11	0	4	0	0	1	0	0	1	2	0	8
6	0.1.11.1.6.1.4	uncultured	408	0	0	0	0	2	1	0	0	0	0	0	0	0	0	1	0	0	0	1	0	0	0	0	0	0	0	1	3	0	0	0	2	0	0	1	0	0	0	0	2	0	0	3	0	0	0
4	0.1.11.1.7	MSB-5E12	1	0	0	0	0	0	0	0	0	0	0	0	0	0	0	0	0	0	0	0	0	0	0	0	0	0	0	0	0	0	0	0	0	0	0	0	0	0	0	0	0	0	0	0	0	0	0
5	0.1.11.1.7.1	MSB-5E12_fa	1	0	0	0	0	0	0	0	0	0	0	0	0	0	0	0	0	0	0	0	0	0	0	0	0	0	0	0	0	0	0	0	0	0	0	0	0	0	0	0	0	0	0	0	0	0	0
6	0.1.11.1.7.1.1	MSB-5E12_ge	1	0	0	0	0	0	0	0	0	0	0	0	0	0	0	0	0	0	0	0	0	0	0	0	0	0	0	0	0	0	0	0	0	0	0	0	0	0	0	0	0	0	0	0	0	0	0
4	0.1.11.1.8	RBG-13-54-9	1300	0	0	0	0	0	0	0	0	0	0	0	0	0	0	0	0	1	0	5	0	0	0	0	0	0	3	1	0	2	3	0	2	0	0	1	4	5	2	0	11	0	0	5	1	0	1
5	0.1.11.1.8.1	RBG-13-54-9_fa	1300	0	0	0	0	0	0	0	0	0	0	0	0	0	0	0	0	1	0	5	0	0	0	0	0	0	3	1	0	2	3	0	2	0	0	1	4	5	2	0	11	0	0	5	1	0	1
6	0.1.11.1.8.1.1	RBG-13-54-9_ge	1300	0	0	0	0	0	0	0	0	0	0	0	0	0	0	0	0	1	0	5	0	0	0	0	0	0	3	1	0	2	3	0	2	0	0	1	4	5	2	0	11	0	0	5	1	0	1
4	0.1.11.1.9	SBR1031	17030	0	0	1	0	5	4	7	4	0	1	0	7	1	1	3	5	30	0	33	4	4	7	0	7	9	13	11	26	18	57	0	60	18	11	53	16	29	29	0	48	0	0	34	5	2	12
5	0.1.11.1.9.1	A4b	14366	0	0	1	0	2	3	7	3	0	1	0	5	1	1	3	4	30	0	30	4	4	7	0	7	8	10	5	22	15	53	0	59	14	7	38	12	20	27	0	35	0	0	31	4	2	12
6	0.1.11.1.9.1.1	A4b_ge	5395	0	0	0	0	1	0	3	2	0	0	0	0	0	1	0	3	19	0	12	1	4	5	0	5	2	7	3	9	6	28	0	20	7	2	29	2	4	20	0	19	0	0	25	1	1	5
6	0.1.11.1.9.1.2	A4b_unclassified	7436	0	0	1	0	1	1	3	1	0	1	0	5	1	0	3	1	11	0	17	3	0	2	0	2	6	3	2	13	9	25	0	38	5	5	9	10	11	6	0	7	0	0	2	3	1	7
6	0.1.11.1.9.1.3	OLB13	13	0	0	0	0	0	0	0	0	0	0	0	0	0	0	0	0	0	0	0	0	0	0	0	0	0	0	0	0	0	0	0	0	0	0	0	0	0	0	0	0	0	0	0	0	0	0
6	0.1.11.1.9.1.4	OLB15	1522	0	0	0	0	0	2	1	0	0	0	0	0	0	0	0	0	0	0	1	0	0	0	0	0	0	0	0	0	0	0	0	1	2	0	0	0	5	1	0	9	0	0	4	0	0	0
5	0.1.11.1.9.2	SBR1031_fa	2341	0	0	0	0	3	1	0	0	0	0	0	2	0	0	0	1	0	0	3	0	0	0	0	0	1	3	6	4	1	3	0	1	1	4	15	3	1	0	0	6	0	0	1	0	0	0
6	0.1.11.1.9.2.1	SBR1031_ge	2341	0	0	0	0	3	1	0	0	0	0	0	2	0	0	0	1	0	0	3	0	0	0	0	0	1	3	6	4	1	3	0	1	1	4	15	3	1	0	0	6	0	0	1	0	0	0
5	0.1.11.1.9.3	SBR1031_unclassified	323	0	0	0	0	0	0	0	1	0	0	0	0	0	0	0	0	0	0	0	0	0	0	0	0	0	0	0	0	2	1	0	0	3	0	0	1	8	2	0	7	0	0	2	1	0	0
6	0.1.11.1.9.3.1	SBR1031_unclassified	323	0	0	0	0	0	0	0	1	0	0	0	0	0	0	0	0	0	0	0	0	0	0	0	0	0	0	0	0	2	1	0	0	3	0	0	1	8	2	0	7	0	0	2	1	0	0
4	0.1.11.1.10	Thermoflexales	1	0	0	0	0	0	0	0	0	0	0	0	0	0	0	0	0	0	0	0	0	0	0	0	0	0	0	0	0	0	0	0	0	0	0	0	0	0	0	0	0	0	0	0	0	0	0
5	0.1.11.1.10.1	Thermoflexaceae	1	0	0	0	0	0	0	0	0	0	0	0	0	0	0	0	0	0	0	0	0	0	0	0	0	0	0	0	0	0	0	0	0	0	0	0	0	0	0	0	0	0	0	0	0	0	0
6	0.1.11.1.10.1.1	Thermoflexus	1	0	0	0	0	0	0	0	0	0	0	0	0	0	0	0	0	0	0	0	0	0	0	0	0	0	0	0	0	0	0	0	0	0	0	0	0	0	0	0	0	0	0	0	0	0	0
3	0.1.11.2	Chloroflexi_cl	4	0	0	0	0	0	0	0	0	0	0	0	0	0	0	0	0	0	0	0	0	0	0	0	0	0	0	0	0	0	0	0	0	0	0	0	0	0	0	0	0	0	0	3	0	0	0
4	0.1.11.2.1	Chloroflexi_or	4	0	0	0	0	0	0	0	0	0	0	0	0	0	0	0	0	0	0	0	0	0	0	0	0	0	0	0	0	0	0	0	0	0	0	0	0	0	0	0	0	0	0	3	0	0	0
5	0.1.11.2.1.1	Chloroflexi_fa	4	0	0	0	0	0	0	0	0	0	0	0	0	0	0	0	0	0	0	0	0	0	0	0	0	0	0	0	0	0	0	0	0	0	0	0	0	0	0	0	0	0	0	3	0	0	0
6	0.1.11.2.1.1.1	Chloroflexi_ge	4	0	0	0	0	0	0	0	0	0	0	0	0	0	0	0	0	0	0	0	0	0	0	0	0	0	0	0	0	0	0	0	0	0	0	0	0	0	0	0	0	0	0	3	0	0	0
3	0.1.11.3	Chloroflexi_unclassified	4407	0	0	1	0	0	3	4	4	0	1	0	1	2	1	2	1	1	0	5	1	3	0	0	1	4	0	5	5	11	12	0	18	6	1	15	6	11	32	0	28	0	0	45	5	4	19
4	0.1.11.3.1	Chloroflexi_unclassified	4407	0	0	1	0	0	3	4	4	0	1	0	1	2	1	2	1	1	0	5	1	3	0	0	1	4	0	5	5	11	12	0	18	6	1	15	6	11	32	0	28	0	0	45	5	4	19
5	0.1.11.3.1.1	Chloroflexi_unclassified	4407	0	0	1	0	0	3	4	4	0	1	0	1	2	1	2	1	1	0	5	1	3	0	0	1	4	0	5	5	11	12	0	18	6	1	15	6	11	32	0	28	0	0	45	5	4	19
6	0.1.11.3.1.1.1	Chloroflexi_unclassified	4407	0	0	1	0	0	3	4	4	0	1	0	1	2	1	2	1	1	0	5	1	3	0	0	1	4	0	5	5	11	12	0	18	6	1	15	6	11	32	0	28	0	0	45	5	4	19
3	0.1.11.4	Chloroflexia	2347	0	0	0	0	2	0	0	7	0	0	0	1	0	0	0	0	5	0	5	2	0	1	0	15	6	0	5	4	11	8	0	24	4	3	20	6	0	4	0	5	0	0	7	1	0	5
4	0.1.11.4.1	Chloroflexales	1988	0	0	0	0	2	0	0	5	0	0	0	1	0	0	0	0	5	0	5	1	0	1	0	15	5	0	5	3	10	8	0	21	4	3	19	6	0	4	0	4	0	0	7	1	0	5
5	0.1.11.4.1.1	Chloroflexaceae	24	0	0	0	0	0	0	0	0	0	0	0	0	0	0	0	0	0	0	0	0	0	0	0	0	0	0	0	0	0	0	0	0	0	0	0	0	0	0	0	0	0	0	0	0	0	1
6	0.1.11.4.1.1.1	Chloroflexaceae_unclassified	15	0	0	0	0	0	0	0	0	0	0	0	0	0	0	0	0	0	0	0	0	0	0	0	0	0	0	0	0	0	0	0	0	0	0	0	0	0	0	0	0	0	0	0	0	0	0
6	0.1.11.4.1.1.2	Chloronema	1	0	0	0	0	0	0	0	0	0	0	0	0	0	0	0	0	0	0	0	0	0	0	0	0	0	0	0	0	0	0	0	0	0	0	0	0	0	0	0	0	0	0	0	0	0	0
6	0.1.11.4.1.1.3	Oscillochloris	4	0	0	0	0	0	0	0	0	0	0	0	0	0	0	0	0	0	0	0	0	0	0	0	0	0	0	0	0	0	0	0	0	0	0	0	0	0	0	0	0	0	0	0	0	0	0
6	0.1.11.4.1.1.4	uncultured	4	0	0	0	0	0	0	0	0	0	0	0	0	0	0	0	0	0	0	0	0	0	0	0	0	0	0	0	0	0	0	0	0	0	0	0	0	0	0	0	0	0	0	0	0	0	1
5	0.1.11.4.1.2	Chloroflexales_unclassified	35	0	0	0	0	0	0	0	0	0	0	0	0	0	0	0	0	0	0	0	0	0	0	0	0	0	0	0	0	0	0	0	1	0	0	0	0	0	0	0	0	0	0	0	0	0	0
6	0.1.11.4.1.2.1	Chloroflexales_unclassified	35	0	0	0	0	0	0	0	0	0	0	0	0	0	0	0	0	0	0	0	0	0	0	0	0	0	0	0	0	0	0	0	1	0	0	0	0	0	0	0	0	0	0	0	0	0	0
5	0.1.11.4.1.3	Herpetosiphonaceae	18	0	0	0	0	0	0	0	0	0	0	0	0	0	0	0	0	0	0	0	0	0	0	0	0	0	0	0	0	0	0	0	0	0	0	0	0	0	0	0	0	0	0	0	0	0	0
6	0.1.11.4.1.3.1	Herpetosiphon	18	0	0	0	0	0	0	0	0	0	0	0	0	0	0	0	0	0	0	0	0	0	0	0	0	0	0	0	0	0	0	0	0	0	0	0	0	0	0	0	0	0	0	0	0	0	0
5	0.1.11.4.1.4	Roseiflexaceae	1911	0	0	0	0	2	0	0	5	0	0	0	1	0	0	0	0	5	0	5	1	0	1	0	15	5	0	5	3	10	8	0	20	4	3	19	6	0	4	0	4	0	0	7	1	0	4
6	0.1.11.4.1.4.1	Kouleothrix	35	0	0	0	0	0	0	0	0	0	0	0	0	0	0	0	0	0	0	0	0	0	0	0	0	0	0	0	0	0	0	0	0	1	0	0	0	0	0	0	0	0	0	0	0	0	0
6	0.1.11.4.1.4.2	Roseiflexaceae_unclassified	113	0	0	0	0	0	0	0	0	0	0	0	0	0	0	0	0	0	0	0	0	0	0	0	0	0	0	0	0	0	2	0	1	2	0	0	0	0	0	0	4	0	0	4	0	0	1
6	0.1.11.4.1.4.3	uncultured	1763	0	0	0	0	2	0	0	5	0	0	0	1	0	0	0	0	5	0	5	1	0	1	0	15	5	0	5	3	10	6	0	19	1	3	19	6	0	4	0	0	0	0	3	1	0	3
4	0.1.11.4.2	Chloroflexia_unclassified	8	0	0	0	0	0	0	0	0	0	0	0	0	0	0	0	0	0	0	0	0	0	0	0	0	0	0	0	0	0	0	0	0	0	0	0	0	0	0	0	1	0	0	0	0	0	0
5	0.1.11.4.2.1	Chloroflexia_unclassified	8	0	0	0	0	0	0	0	0	0	0	0	0	0	0	0	0	0	0	0	0	0	0	0	0	0	0	0	0	0	0	0	0	0	0	0	0	0	0	0	1	0	0	0	0	0	0
6	0.1.11.4.2.1.1	Chloroflexia_unclassified	8	0	0	0	0	0	0	0	0	0	0	0	0	0	0	0	0	0	0	0	0	0	0	0	0	0	0	0	0	0	0	0	0	0	0	0	0	0	0	0	1	0	0	0	0	0	0
4	0.1.11.4.3	Kallotenuales	4	0	0	0	0	0	0	0	0	0	0	0	0	0	0	0	0	0	0	0	0	0	0	0	0	0	0	0	0	0	0	0	0	0	0	0	0	0	0	0	0	0	0	0	0	0	0
5	0.1.11.4.3.1	AKIW781	4	0	0	0	0	0	0	0	0	0	0	0	0	0	0	0	0	0	0	0	0	0	0	0	0	0	0	0	0	0	0	0	0	0	0	0	0	0	0	0	0	0	0	0	0	0	0
6	0.1.11.4.3.1.1	AKIW781_ge	4	0	0	0	0	0	0	0	0	0	0	0	0	0	0	0	0	0	0	0	0	0	0	0	0	0	0	0	0	0	0	0	0	0	0	0	0	0	0	0	0	0	0	0	0	0	0
4	0.1.11.4.4	Thermomicrobiales	347	0	0	0	0	0	0	0	2	0	0	0	0	0	0	0	0	0	0	0	1	0	0	0	0	1	0	0	1	1	0	0	3	0	0	1	0	0	0	0	0	0	0	0	0	0	0
5	0.1.11.4.4.1	AKYG1722	7	0	0	0	0	0	0	0	0	0	0	0	0	0	0	0	0	0	0	0	0	0	0	0	0	0	0	0	0	0	0	0	0	0	0	0	0	0	0	0	0	0	0	0	0	0	0
6	0.1.11.4.4.1.1	AKYG1722_ge	7	0	0	0	0	0	0	0	0	0	0	0	0	0	0	0	0	0	0	0	0	0	0	0	0	0	0	0	0	0	0	0	0	0	0	0	0	0	0	0	0	0	0	0	0	0	0
5	0.1.11.4.4.2	JG30-KF-CM45	302	0	0	0	0	0	0	0	2	0	0	0	0	0	0	0	0	0	0	0	1	0	0	0	0	1	0	0	1	1	0	0	3	0	0	1	0	0	0	0	0	0	0	0	0	0	0
6	0.1.11.4.4.2.1	JG30-KF-CM45_ge	302	0	0	0	0	0	0	0	2	0	0	0	0	0	0	0	0	0	0	0	1	0	0	0	0	1	0	0	1	1	0	0	3	0	0	1	0	0	0	0	0	0	0	0	0	0	0
5	0.1.11.4.4.3	Thermomicrobiaceae	1	0	0	0	0	0	0	0	0	0	0	0	0	0	0	0	0	0	0	0	0	0	0	0	0	0	0	0	0	0	0	0	0	0	0	0	0	0	0	0	0	0	0	0	0	0	0
6	0.1.11.4.4.3.1	Thermomicrobiaceae_unclassified	1	0	0	0	0	0	0	0	0	0	0	0	0	0	0	0	0	0	0	0	0	0	0	0	0	0	0	0	0	0	0	0	0	0	0	0	0	0	0	0	0	0	0	0	0	0	0
5	0.1.11.4.4.4	Thermomicrobiales_unclassified	37	0	0	0	0	0	0	0	0	0	0	0	0	0	0	0	0	0	0	0	0	0	0	0	0	0	0	0	0	0	0	0	0	0	0	0	0	0	0	0	0	0	0	0	0	0	0
6	0.1.11.4.4.4.1	Thermomicrobiales_unclassified	37	0	0	0	0	0	0	0	0	0	0	0	0	0	0	0	0	0	0	0	0	0	0	0	0	0	0	0	0	0	0	0	0	0	0	0	0	0	0	0	0	0	0	0	0	0	0
3	0.1.11.5	Dehalococcoidia	13232	0	0	0	0	0	8	2	2	0	2	0	6	2	11	12	5	14	0	29	6	1	5	2	14	9	8	14	33	16	31	0	42	17	4	32	18	45	45	0	56	0	0	24	7	1	11
4	0.1.11.5.1	1226B1H1-22-FL	1	0	0	0	0	0	0	0	0	0	0	0	0	0	0	0	0	0	0	0	0	0	0	0	0	0	0	0	0	0	0	0	0	0	0	0	0	0	0	0	0	0	0	0	0	0	0
5	0.1.11.5.1.1	1226B1H1-22-FL_fa	1	0	0	0	0	0	0	0	0	0	0	0	0	0	0	0	0	0	0	0	0	0	0	0	0	0	0	0	0	0	0	0	0	0	0	0	0	0	0	0	0	0	0	0	0	0	0
6	0.1.11.5.1.1.1	1226B1H1-22-FL_ge	1	0	0	0	0	0	0	0	0	0	0	0	0	0	0	0	0	0	0	0	0	0	0	0	0	0	0	0	0	0	0	0	0	0	0	0	0	0	0	0	0	0	0	0	0	0	0
4	0.1.11.5.2	Dehalococcoidales	1	0	0	0	0	0	0	0	0	0	0	0	0	0	0	0	0	0	0	1	0	0	0	0	0	0	0	0	0	0	0	0	0	0	0	0	0	0	0	0	0	0	0	0	0	0	0
5	0.1.11.5.2.1	Dehalococcoidaceae	1	0	0	0	0	0	0	0	0	0	0	0	0	0	0	0	0	0	0	1	0	0	0	0	0	0	0	0	0	0	0	0	0	0	0	0	0	0	0	0	0	0	0	0	0	0	0
6	0.1.11.5.2.1.1	Dehalogenimonas	1	0	0	0	0	0	0	0	0	0	0	0	0	0	0	0	0	0	0	1	0	0	0	0	0	0	0	0	0	0	0	0	0	0	0	0	0	0	0	0	0	0	0	0	0	0	0
4	0.1.11.5.3	Dehalococcoidia_unclassified	643	0	0	0	0	0	1	0	1	0	2	0	1	2	10	1	1	4	0	15	0	0	0	0	0	7	3	5	3	10	11	0	6	7	1	2	7	0	1	0	0	0	0	1	0	0	0
5	0.1.11.5.3.1	Dehalococcoidia_unclassified	643	0	0	0	0	0	1	0	1	0	2	0	1	2	10	1	1	4	0	15	0	0	0	0	0	7	3	5	3	10	11	0	6	7	1	2	7	0	1	0	0	0	0	1	0	0	0
6	0.1.11.5.3.1.1	Dehalococcoidia_unclassified	643	0	0	0	0	0	1	0	1	0	2	0	1	2	10	1	1	4	0	15	0	0	0	0	0	7	3	5	3	10	11	0	6	7	1	2	7	0	1	0	0	0	0	1	0	0	0
4	0.1.11.5.4	S085	12586	0	0	0	0	0	7	2	1	0	0	0	5	0	1	11	4	10	0	13	6	1	5	2	14	2	5	9	30	6	20	0	36	10	3	30	11	45	44	0	56	0	0	23	7	1	11
5	0.1.11.5.4.1	S085_fa	12586	0	0	0	0	0	7	2	1	0	0	0	5	0	1	11	4	10	0	13	6	1	5	2	14	2	5	9	30	6	20	0	36	10	3	30	11	45	44	0	56	0	0	23	7	1	11
6	0.1.11.5.4.1.1	S085_ge	12586	0	0	0	0	0	7	2	1	0	0	0	5	0	1	11	4	10	0	13	6	1	5	2	14	2	5	9	30	6	20	0	36	10	3	30	11	45	44	0	56	0	0	23	7	1	11
4	0.1.11.5.5	SAR202_clade	1	0	0	0	0	0	0	0	0	0	0	0	0	0	0	0	0	0	0	0	0	0	0	0	0	0	0	0	0	0	0	0	0	0	0	0	0	0	0	0	0	0	0	0	0	0	0
5	0.1.11.5.5.1	SAR202_clade_fa	1	0	0	0	0	0	0	0	0	0	0	0	0	0	0	0	0	0	0	0	0	0	0	0	0	0	0	0	0	0	0	0	0	0	0	0	0	0	0	0	0	0	0	0	0	0	0
6	0.1.11.5.5.1.1	SAR202_clade_ge	1	0	0	0	0	0	0	0	0	0	0	0	0	0	0	0	0	0	0	0	0	0	0	0	0	0	0	0	0	0	0	0	0	0	0	0	0	0	0	0	0	0	0	0	0	0	0
3	0.1.11.6	Gitt-GS-136	618	0	0	0	0	0	0	0	2	0	0	0	0	0	0	0	1	0	0	2	0	0	0	0	2	1	0	2	1	0	0	0	0	2	0	3	0	0	0	0	4	0	0	2	2	0	1
4	0.1.11.6.1	Gitt-GS-136_or	618	0	0	0	0	0	0	0	2	0	0	0	0	0	0	0	1	0	0	2	0	0	0	0	2	1	0	2	1	0	0	0	0	2	0	3	0	0	0	0	4	0	0	2	2	0	1
5	0.1.11.6.1.1	Gitt-GS-136_fa	618	0	0	0	0	0	0	0	2	0	0	0	0	0	0	0	1	0	0	2	0	0	0	0	2	1	0	2	1	0	0	0	0	2	0	3	0	0	0	0	4	0	0	2	2	0	1
6	0.1.11.6.1.1.1	Gitt-GS-136_ge	618	0	0	0	0	0	0	0	2	0	0	0	0	0	0	0	1	0	0	2	0	0	0	0	2	1	0	2	1	0	0	0	0	2	0	3	0	0	0	0	4	0	0	2	2	0	1
3	0.1.11.7	JG30-KF-CM66	2274	0	0	0	0	0	2	1	0	0	0	0	1	0	0	2	2	5	0	0	0	0	0	0	5	0	0	1	3	2	2	0	9	1	2	6	0	1	4	0	14	0	0	3	0	0	5
4	0.1.11.7.1	JG30-KF-CM66_or	2274	0	0	0	0	0	2	1	0	0	0	0	1	0	0	2	2	5	0	0	0	0	0	0	5	0	0	1	3	2	2	0	9	1	2	6	0	1	4	0	14	0	0	3	0	0	5
5	0.1.11.7.1.1	JG30-KF-CM66_fa	2274	0	0	0	0	0	2	1	0	0	0	0	1	0	0	2	2	5	0	0	0	0	0	0	5	0	0	1	3	2	2	0	9	1	2	6	0	1	4	0	14	0	0	3	0	0	5
6	0.1.11.7.1.1.1	JG30-KF-CM66_ge	2274	0	0	0	0	0	2	1	0	0	0	0	1	0	0	2	2	5	0	0	0	0	0	0	5	0	0	1	3	2	2	0	9	1	2	6	0	1	4	0	14	0	0	3	0	0	5
3	0.1.11.8	KD4-96	14553	0	0	0	0	1	11	3	6	0	0	0	4	2	2	6	3	20	0	35	4	0	8	1	12	9	11	10	24	20	36	0	42	11	10	28	19	14	39	0	27	0	0	28	12	1	32
4	0.1.11.8.1	KD4-96_or	14553	0	0	0	0	1	11	3	6	0	0	0	4	2	2	6	3	20	0	35	4	0	8	1	12	9	11	10	24	20	36	0	42	11	10	28	19	14	39	0	27	0	0	28	12	1	32
5	0.1.11.8.1.1	KD4-96_fa	14553	0	0	0	0	1	11	3	6	0	0	0	4	2	2	6	3	20	0	35	4	0	8	1	12	9	11	10	24	20	36	0	42	11	10	28	19	14	39	0	27	0	0	28	12	1	32
6	0.1.11.8.1.1.1	KD4-96_ge	14553	0	0	0	0	1	11	3	6	0	0	0	4	2	2	6	3	20	0	35	4	0	8	1	12	9	11	10	24	20	36	0	42	11	10	28	19	14	39	0	27	0	0	28	12	1	32
3	0.1.11.9	Ktedonobacteria	893	0	0	0	0	0	0	0	0	0	0	0	0	0	0	0	0	0	0	0	0	1	0	0	0	0	0	1	0	0	0	0	0	0	0	0	1	6	1	0	2	0	0	2	1	0	1
4	0.1.11.9.1	C0119	7	0	0	0	0	0	0	0	0	0	0	0	0	0	0	0	0	0	0	0	0	0	0	0	0	0	0	0	0	0	0	0	0	0	0	0	0	0	0	0	0	0	0	0	0	0	0
5	0.1.11.9.1.1	C0119_fa	7	0	0	0	0	0	0	0	0	0	0	0	0	0	0	0	0	0	0	0	0	0	0	0	0	0	0	0	0	0	0	0	0	0	0	0	0	0	0	0	0	0	0	0	0	0	0
6	0.1.11.9.1.1.1	C0119_ge	7	0	0	0	0	0	0	0	0	0	0	0	0	0	0	0	0	0	0	0	0	0	0	0	0	0	0	0	0	0	0	0	0	0	0	0	0	0	0	0	0	0	0	0	0	0	0
4	0.1.11.9.2	Ktedonobacterales	885	0	0	0	0	0	0	0	0	0	0	0	0	0	0	0	0	0	0	0	0	1	0	0	0	0	0	1	0	0	0	0	0	0	0	0	1	6	1	0	2	0	0	2	1	0	1
5	0.1.11.9.2.1	JG30-KF-AS9	755	0	0	0	0	0	0	0	0	0	0	0	0	0	0	0	0	0	0	0	0	1	0	0	0	0	0	0	0	0	0	0	0	0	0	0	1	4	0	0	0	0	0	0	0	0	0
6	0.1.11.9.2.1.1	JG30-KF-AS9_ge	755	0	0	0	0	0	0	0	0	0	0	0	0	0	0	0	0	0	0	0	0	1	0	0	0	0	0	0	0	0	0	0	0	0	0	0	1	4	0	0	0	0	0	0	0	0	0
5	0.1.11.9.2.2	Ktedonobacteraceae	22	0	0	0	0	0	0	0	0	0	0	0	0	0	0	0	0	0	0	0	0	0	0	0	0	0	0	1	0	0	0	0	0	0	0	0	0	1	0	0	2	0	0	1	1	0	0
6	0.1.11.9.2.2.1	Ktedonobacter	4	0	0	0	0	0	0	0	0	0	0	0	0	0	0	0	0	0	0	0	0	0	0	0	0	0	0	0	0	0	0	0	0	0	0	0	0	1	0	0	0	0	0	0	0	0	0
6	0.1.11.9.2.2.2	Ktedonobacteraceae_ge	5	0	0	0	0	0	0	0	0	0	0	0	0	0	0	0	0	0	0	0	0	0	0	0	0	0	0	0	0	0	0	0	0	0	0	0	0	0	0	0	1	0	0	0	1	0	0
6	0.1.11.9.2.2.3	Ktedonobacteraceae_unclassified	11	0	0	0	0	0	0	0	0	0	0	0	0	0	0	0	0	0	0	0	0	0	0	0	0	0	0	0	0	0	0	0	0	0	0	0	0	0	0	0	1	0	0	1	0	0	0
6	0.1.11.9.2.2.4	uncultured	2	0	0	0	0	0	0	0	0	0	0	0	0	0	0	0	0	0	0	0	0	0	0	0	0	0	0	1	0	0	0	0	0	0	0	0	0	0	0	0	0	0	0	0	0	0	0
5	0.1.11.9.2.3	Ktedonobacterales_unclassified	108	0	0	0	0	0	0	0	0	0	0	0	0	0	0	0	0	0	0	0	0	0	0	0	0	0	0	0	0	0	0	0	0	0	0	0	0	1	1	0	0	0	0	1	0	0	1
6	0.1.11.9.2.3.1	Ktedonobacterales_unclassified	108	0	0	0	0	0	0	0	0	0	0	0	0	0	0	0	0	0	0	0	0	0	0	0	0	0	0	0	0	0	0	0	0	0	0	0	0	1	1	0	0	0	0	1	0	0	1
4	0.1.11.9.3	Ktedonobacteria_unclassified	1	0	0	0	0	0	0	0	0	0	0	0	0	0	0	0	0	0	0	0	0	0	0	0	0	0	0	0	0	0	0	0	0	0	0	0	0	0	0	0	0	0	0	0	0	0	0
5	0.1.11.9.3.1	Ktedonobacteria_unclassified	1	0	0	0	0	0	0	0	0	0	0	0	0	0	0	0	0	0	0	0	0	0	0	0	0	0	0	0	0	0	0	0	0	0	0	0	0	0	0	0	0	0	0	0	0	0	0
6	0.1.11.9.3.1.1	Ktedonobacteria_unclassified	1	0	0	0	0	0	0	0	0	0	0	0	0	0	0	0	0	0	0	0	0	0	0	0	0	0	0	0	0	0	0	0	0	0	0	0	0	0	0	0	0	0	0	0	0	0	0
3	0.1.11.10	OLB14	72	0	0	0	0	0	0	0	0	0	0	0	0	0	0	0	0	0	0	0	0	0	0	0	0	0	0	0	0	0	0	0	0	0	0	0	0	0	2	0	0	0	0	7	0	0	0
4	0.1.11.10.1	OLB14_or	72	0	0	0	0	0	0	0	0	0	0	0	0	0	0	0	0	0	0	0	0	0	0	0	0	0	0	0	0	0	0	0	0	0	0	0	0	0	2	0	0	0	0	7	0	0	0
5	0.1.11.10.1.1	OLB14_fa	72	0	0	0	0	0	0	0	0	0	0	0	0	0	0	0	0	0	0	0	0	0	0	0	0	0	0	0	0	0	0	0	0	0	0	0	0	0	2	0	0	0	0	7	0	0	0
6	0.1.11.10.1.1.1	OLB14_ge	72	0	0	0	0	0	0	0	0	0	0	0	0	0	0	0	0	0	0	0	0	0	0	0	0	0	0	0	0	0	0	0	0	0	0	0	0	0	2	0	0	0	0	7	0	0	0
3	0.1.11.11	P2-11E	1	0	0	0	0	0	0	0	0	0	0	0	0	0	0	0	0	0	0	0	0	0	0	0	0	0	0	0	0	0	0	0	0	0	0	0	0	0	0	0	0	0	0	0	0	0	0
4	0.1.11.11.1	P2-11E_or	1	0	0	0	0	0	0	0	0	0	0	0	0	0	0	0	0	0	0	0	0	0	0	0	0	0	0	0	0	0	0	0	0	0	0	0	0	0	0	0	0	0	0	0	0	0	0
5	0.1.11.11.1.1	P2-11E_fa	1	0	0	0	0	0	0	0	0	0	0	0	0	0	0	0	0	0	0	0	0	0	0	0	0	0	0	0	0	0	0	0	0	0	0	0	0	0	0	0	0	0	0	0	0	0	0
6	0.1.11.11.1.1.1	P2-11E_ge	1	0	0	0	0	0	0	0	0	0	0	0	0	0	0	0	0	0	0	0	0	0	0	0	0	0	0	0	0	0	0	0	0	0	0	0	0	0	0	0	0	0	0	0	0	0	0
3	0.1.11.12	SHA-26	12	0	0	0	0	0	0	0	0	0	0	0	0	0	0	0	0	0	0	0	0	0	0	0	0	0	0	0	0	0	0	0	0	0	0	0	0	0	0	0	0	0	0	0	0	0	0
4	0.1.11.12.1	SHA-26_or	12	0	0	0	0	0	0	0	0	0	0	0	0	0	0	0	0	0	0	0	0	0	0	0	0	0	0	0	0	0	0	0	0	0	0	0	0	0	0	0	0	0	0	0	0	0	0
5	0.1.11.12.1.1	SHA-26_fa	12	0	0	0	0	0	0	0	0	0	0	0	0	0	0	0	0	0	0	0	0	0	0	0	0	0	0	0	0	0	0	0	0	0	0	0	0	0	0	0	0	0	0	0	0	0	0
6	0.1.11.12.1.1.1	SHA-26_ge	12	0	0	0	0	0	0	0	0	0	0	0	0	0	0	0	0	0	0	0	0	0	0	0	0	0	0	0	0	0	0	0	0	0	0	0	0	0	0	0	0	0	0	0	0	0	0
3	0.1.11.13	TK10	1268	0	0	0	1	2	0	0	0	0	0	0	0	1	0	0	0	0	0	6	0	1	1	0	1	0	0	1	6	2	3	0	3	1	1	6	1	4	1	0	9	0	0	6	0	0	3
4	0.1.11.13.1	TK10_or	1268	0	0	0	1	2	0	0	0	0	0	0	0	1	0	0	0	0	0	6	0	1	1	0	1	0	0	1	6	2	3	0	3	1	1	6	1	4	1	0	9	0	0	6	0	0	3
5	0.1.11.13.1.1	TK10_fa	1268	0	0	0	1	2	0	0	0	0	0	0	0	1	0	0	0	0	0	6	0	1	1	0	1	0	0	1	6	2	3	0	3	1	1	6	1	4	1	0	9	0	0	6	0	0	3
6	0.1.11.13.1.1.1	TK10_ge	1268	0	0	0	1	2	0	0	0	0	0	0	0	1	0	0	0	0	0	6	0	1	1	0	1	0	0	1	6	2	3	0	3	1	1	6	1	4	1	0	9	0	0	6	0	0	3
2	0.1.12	Cyanobacteria	9833	12	0	0	4	3	13	26	8	0	37	0	83	5	4	13	13	77	0	218	83	49	126	72	52	16	20	72	65	20	284	0	239	63	98	60	100	37	12	0	11	0	0	10	16	1	7
3	0.1.12.1	Cyanobacteria_unclassified	143	0	0	0	0	0	0	0	0	0	2	0	0	0	0	0	0	0	0	2	1	1	1	1	2	0	0	2	3	1	0	0	10	3	0	0	0	0	2	0	0	0	0	1	3	0	0
4	0.1.12.1.1	Cyanobacteria_unclassified	143	0	0	0	0	0	0	0	0	0	2	0	0	0	0	0	0	0	0	2	1	1	1	1	2	0	0	2	3	1	0	0	10	3	0	0	0	0	2	0	0	0	0	1	3	0	0
5	0.1.12.1.1.1	Cyanobacteria_unclassified	143	0	0	0	0	0	0	0	0	0	2	0	0	0	0	0	0	0	0	2	1	1	1	1	2	0	0	2	3	1	0	0	10	3	0	0	0	0	2	0	0	0	0	1	3	0	0
6	0.1.12.1.1.1.1	Cyanobacteria_unclassified	143	0	0	0	0	0	0	0	0	0	2	0	0	0	0	0	0	0	0	2	1	1	1	1	2	0	0	2	3	1	0	0	10	3	0	0	0	0	2	0	0	0	0	1	3	0	0
3	0.1.12.2	Cyanobacteriia	5973	3	0	0	4	2	6	11	1	0	9	0	73	3	3	13	0	52	0	178	54	4	77	12	22	14	7	19	22	5	187	0	150	40	29	52	34	18	5	0	5	0	0	4	13	1	2
4	0.1.12.2.1	Chloroplast	5806	3	0	0	4	2	6	11	1	0	9	0	71	3	3	12	0	51	0	172	52	4	73	12	22	14	6	17	21	5	185	0	148	39	29	52	34	16	5	0	3	0	0	3	11	1	1
5	0.1.12.2.1.1	Chloroplast_fa	5806	3	0	0	4	2	6	11	1	0	9	0	71	3	3	12	0	51	0	172	52	4	73	12	22	14	6	17	21	5	185	0	148	39	29	52	34	16	5	0	3	0	0	3	11	1	1
6	0.1.12.2.1.1.1	Chloroplast_ge	5806	3	0	0	4	2	6	11	1	0	9	0	71	3	3	12	0	51	0	172	52	4	73	12	22	14	6	17	21	5	185	0	148	39	29	52	34	16	5	0	3	0	0	3	11	1	1
4	0.1.12.2.2	Cyanobacteriales	20	0	0	0	0	0	0	0	0	0	0	0	0	0	0	0	0	0	0	1	0	0	0	0	0	0	0	0	0	0	0	0	1	0	0	0	0	1	0	0	0	0	0	0	0	0	0
5	0.1.12.2.2.1	Cyanobacteriales_unclassified	13	0	0	0	0	0	0	0	0	0	0	0	0	0	0	0	0	0	0	0	0	0	0	0	0	0	0	0	0	0	0	0	0	0	0	0	0	1	0	0	0	0	0	0	0	0	0
6	0.1.12.2.2.1.1	Cyanobacteriales_unclassified	13	0	0	0	0	0	0	0	0	0	0	0	0	0	0	0	0	0	0	0	0	0	0	0	0	0	0	0	0	0	0	0	0	0	0	0	0	1	0	0	0	0	0	0	0	0	0
5	0.1.12.2.2.2	Paraspirulinaceae	2	0	0	0	0	0	0	0	0	0	0	0	0	0	0	0	0	0	0	1	0	0	0	0	0	0	0	0	0	0	0	0	1	0	0	0	0	0	0	0	0	0	0	0	0	0	0
6	0.1.12.2.2.2.1	ESFC-1	2	0	0	0	0	0	0	0	0	0	0	0	0	0	0	0	0	0	0	1	0	0	0	0	0	0	0	0	0	0	0	0	1	0	0	0	0	0	0	0	0	0	0	0	0	0	0
5	0.1.12.2.2.3	Phormidiaceae	5	0	0	0	0	0	0	0	0	0	0	0	0	0	0	0	0	0	0	0	0	0	0	0	0	0	0	0	0	0	0	0	0	0	0	0	0	0	0	0	0	0	0	0	0	0	0
6	0.1.12.2.2.3.1	Phormidiaceae_unclassified	5	0	0	0	0	0	0	0	0	0	0	0	0	0	0	0	0	0	0	0	0	0	0	0	0	0	0	0	0	0	0	0	0	0	0	0	0	0	0	0	0	0	0	0	0	0	0
4	0.1.12.2.3	Cyanobacteriia_unclassified	147	0	0	0	0	0	0	0	0	0	0	0	2	0	0	1	0	1	0	5	2	0	4	0	0	0	1	2	1	0	2	0	1	1	0	0	0	1	0	0	2	0	0	1	2	0	1
5	0.1.12.2.3.1	Cyanobacteriia_unclassified	147	0	0	0	0	0	0	0	0	0	0	0	2	0	0	1	0	1	0	5	2	0	4	0	0	0	1	2	1	0	2	0	1	1	0	0	0	1	0	0	2	0	0	1	2	0	1
6	0.1.12.2.3.1.1	Cyanobacteriia_unclassified	147	0	0	0	0	0	0	0	0	0	0	0	2	0	0	1	0	1	0	5	2	0	4	0	0	0	1	2	1	0	2	0	1	1	0	0	0	1	0	0	2	0	0	1	2	0	1
3	0.1.12.3	Sericytochromatia	9	0	0	0	0	0	0	0	0	0	0	0	0	0	0	0	0	0	0	0	0	0	0	0	0	0	0	0	0	0	0	0	0	0	0	0	0	0	0	0	0	0	0	0	0	0	0
4	0.1.12.3.1	Sericytochromatia_or	9	0	0	0	0	0	0	0	0	0	0	0	0	0	0	0	0	0	0	0	0	0	0	0	0	0	0	0	0	0	0	0	0	0	0	0	0	0	0	0	0	0	0	0	0	0	0
5	0.1.12.3.1.1	Sericytochromatia_fa	9	0	0	0	0	0	0	0	0	0	0	0	0	0	0	0	0	0	0	0	0	0	0	0	0	0	0	0	0	0	0	0	0	0	0	0	0	0	0	0	0	0	0	0	0	0	0
6	0.1.12.3.1.1.1	Sericytochromatia_ge	9	0	0	0	0	0	0	0	0	0	0	0	0	0	0	0	0	0	0	0	0	0	0	0	0	0	0	0	0	0	0	0	0	0	0	0	0	0	0	0	0	0	0	0	0	0	0
3	0.1.12.4	Vampirivibrionia	3708	9	0	0	0	1	7	15	7	0	26	0	10	2	1	0	13	25	0	38	28	44	48	59	28	2	13	51	40	14	97	0	79	20	69	8	66	19	5	0	6	0	0	5	0	0	5
4	0.1.12.4.1	Gastranaerophilales	3634	9	0	0	0	1	7	15	7	0	26	0	10	2	1	0	13	24	0	38	28	44	48	58	28	2	13	51	40	14	96	0	79	20	69	8	66	12	5	0	6	0	0	3	0	0	5
5	0.1.12.4.1.1	Gastranaerophilales_fa	3634	9	0	0	0	1	7	15	7	0	26	0	10	2	1	0	13	24	0	38	28	44	48	58	28	2	13	51	40	14	96	0	79	20	69	8	66	12	5	0	6	0	0	3	0	0	5
6	0.1.12.4.1.1.1	Gastranaerophilales_ge	3634	9	0	0	0	1	7	15	7	0	26	0	10	2	1	0	13	24	0	38	28	44	48	58	28	2	13	51	40	14	96	0	79	20	69	8	66	12	5	0	6	0	0	3	0	0	5
4	0.1.12.4.2	Obscuribacterales	45	0	0	0	0	0	0	0	0	0	0	0	0	0	0	0	0	1	0	0	0	0	0	0	0	0	0	0	0	0	0	0	0	0	0	0	0	7	0	0	0	0	0	0	0	0	0
5	0.1.12.4.2.1	Obscuribacteraceae	45	0	0	0	0	0	0	0	0	0	0	0	0	0	0	0	0	1	0	0	0	0	0	0	0	0	0	0	0	0	0	0	0	0	0	0	0	7	0	0	0	0	0	0	0	0	0
6	0.1.12.4.2.1.1	Candidatus_Obscuribacter	5	0	0	0	0	0	0	0	0	0	0	0	0	0	0	0	0	0	0	0	0	0	0	0	0	0	0	0	0	0	0	0	0	0	0	0	0	0	0	0	0	0	0	0	0	0	0
6	0.1.12.4.2.1.2	Obscuribacteraceae_ge	17	0	0	0	0	0	0	0	0	0	0	0	0	0	0	0	0	1	0	0	0	0	0	0	0	0	0	0	0	0	0	0	0	0	0	0	0	0	0	0	0	0	0	0	0	0	0
6	0.1.12.4.2.1.3	Obscuribacteraceae_unclassified	23	0	0	0	0	0	0	0	0	0	0	0	0	0	0	0	0	0	0	0	0	0	0	0	0	0	0	0	0	0	0	0	0	0	0	0	0	7	0	0	0	0	0	0	0	0	0
4	0.1.12.4.3	Vampirivibrionia_unclassified	19	0	0	0	0	0	0	0	0	0	0	0	0	0	0	0	0	0	0	0	0	0	0	1	0	0	0	0	0	0	1	0	0	0	0	0	0	0	0	0	0	0	0	0	0	0	0
5	0.1.12.4.3.1	Vampirivibrionia_unclassified	19	0	0	0	0	0	0	0	0	0	0	0	0	0	0	0	0	0	0	0	0	0	0	1	0	0	0	0	0	0	1	0	0	0	0	0	0	0	0	0	0	0	0	0	0	0	0
6	0.1.12.4.3.1.1	Vampirivibrionia_unclassified	19	0	0	0	0	0	0	0	0	0	0	0	0	0	0	0	0	0	0	0	0	0	0	1	0	0	0	0	0	0	1	0	0	0	0	0	0	0	0	0	0	0	0	0	0	0	0
4	0.1.12.4.4	Vampirovibrionales	10	0	0	0	0	0	0	0	0	0	0	0	0	0	0	0	0	0	0	0	0	0	0	0	0	0	0	0	0	0	0	0	0	0	0	0	0	0	0	0	0	0	0	2	0	0	0
5	0.1.12.4.4.1	Vampirovibrionaceae	8	0	0	0	0	0	0	0	0	0	0	0	0	0	0	0	0	0	0	0	0	0	0	0	0	0	0	0	0	0	0	0	0	0	0	0	0	0	0	0	0	0	0	2	0	0	0
6	0.1.12.4.4.1.1	Vampirovibrio	2	0	0	0	0	0	0	0	0	0	0	0	0	0	0	0	0	0	0	0	0	0	0	0	0	0	0	0	0	0	0	0	0	0	0	0	0	0	0	0	0	0	0	0	0	0	0
6	0.1.12.4.4.1.2	Vampirovibrionaceae_ge	6	0	0	0	0	0	0	0	0	0	0	0	0	0	0	0	0	0	0	0	0	0	0	0	0	0	0	0	0	0	0	0	0	0	0	0	0	0	0	0	0	0	0	2	0	0	0
5	0.1.12.4.4.2	Vampirovibrionales_fa	2	0	0	0	0	0	0	0	0	0	0	0	0	0	0	0	0	0	0	0	0	0	0	0	0	0	0	0	0	0	0	0	0	0	0	0	0	0	0	0	0	0	0	0	0	0	0
6	0.1.12.4.4.2.1	Vampirovibrionales_ge	2	0	0	0	0	0	0	0	0	0	0	0	0	0	0	0	0	0	0	0	0	0	0	0	0	0	0	0	0	0	0	0	0	0	0	0	0	0	0	0	0	0	0	0	0	0	0
2	0.1.13	Dadabacteria	16	0	0	0	0	0	0	0	0	0	0	0	0	0	0	0	0	0	0	0	0	0	0	0	0	0	0	0	0	0	0	0	0	0	0	0	0	0	0	0	0	0	0	0	0	0	0
3	0.1.13.1	Dadabacteriia	16	0	0	0	0	0	0	0	0	0	0	0	0	0	0	0	0	0	0	0	0	0	0	0	0	0	0	0	0	0	0	0	0	0	0	0	0	0	0	0	0	0	0	0	0	0	0
4	0.1.13.1.1	Dadabacteriales	16	0	0	0	0	0	0	0	0	0	0	0	0	0	0	0	0	0	0	0	0	0	0	0	0	0	0	0	0	0	0	0	0	0	0	0	0	0	0	0	0	0	0	0	0	0	0
5	0.1.13.1.1.1	Dadabacteriales_fa	16	0	0	0	0	0	0	0	0	0	0	0	0	0	0	0	0	0	0	0	0	0	0	0	0	0	0	0	0	0	0	0	0	0	0	0	0	0	0	0	0	0	0	0	0	0	0
6	0.1.13.1.1.1.1	Dadabacteriales_ge	16	0	0	0	0	0	0	0	0	0	0	0	0	0	0	0	0	0	0	0	0	0	0	0	0	0	0	0	0	0	0	0	0	0	0	0	0	0	0	0	0	0	0	0	0	0	0
2	0.1.14	Deferribacterota	311	0	0	0	0	0	0	0	0	0	0	0	0	0	0	0	0	0	0	0	0	0	0	0	0	0	0	0	0	0	0	0	0	0	0	0	0	0	0	0	0	0	0	0	0	0	0
3	0.1.14.1	Deferribacteres	311	0	0	0	0	0	0	0	0	0	0	0	0	0	0	0	0	0	0	0	0	0	0	0	0	0	0	0	0	0	0	0	0	0	0	0	0	0	0	0	0	0	0	0	0	0	0
4	0.1.14.1.1	Deferribacterales	311	0	0	0	0	0	0	0	0	0	0	0	0	0	0	0	0	0	0	0	0	0	0	0	0	0	0	0	0	0	0	0	0	0	0	0	0	0	0	0	0	0	0	0	0	0	0
5	0.1.14.1.1.1	Deferribacteraceae	311	0	0	0	0	0	0	0	0	0	0	0	0	0	0	0	0	0	0	0	0	0	0	0	0	0	0	0	0	0	0	0	0	0	0	0	0	0	0	0	0	0	0	0	0	0	0
6	0.1.14.1.1.1.1	Deferribacteraceae_unclassified	8	0	0	0	0	0	0	0	0	0	0	0	0	0	0	0	0	0	0	0	0	0	0	0	0	0	0	0	0	0	0	0	0	0	0	0	0	0	0	0	0	0	0	0	0	0	0
6	0.1.14.1.1.1.2	Mucispirillum	303	0	0	0	0	0	0	0	0	0	0	0	0	0	0	0	0	0	0	0	0	0	0	0	0	0	0	0	0	0	0	0	0	0	0	0	0	0	0	0	0	0	0	0	0	0	0
2	0.1.15	Deferrisomatota	3	0	0	0	0	0	0	0	0	0	0	0	0	0	0	0	0	0	0	0	0	0	0	0	0	0	0	0	0	0	0	0	0	0	0	0	0	0	0	0	0	0	0	0	0	0	0
3	0.1.15.1	Defferrisomatia	3	0	0	0	0	0	0	0	0	0	0	0	0	0	0	0	0	0	0	0	0	0	0	0	0	0	0	0	0	0	0	0	0	0	0	0	0	0	0	0	0	0	0	0	0	0	0
4	0.1.15.1.1	Defferrisomatales	3	0	0	0	0	0	0	0	0	0	0	0	0	0	0	0	0	0	0	0	0	0	0	0	0	0	0	0	0	0	0	0	0	0	0	0	0	0	0	0	0	0	0	0	0	0	0
5	0.1.15.1.1.1	Defferrisomataceae	3	0	0	0	0	0	0	0	0	0	0	0	0	0	0	0	0	0	0	0	0	0	0	0	0	0	0	0	0	0	0	0	0	0	0	0	0	0	0	0	0	0	0	0	0	0	0
6	0.1.15.1.1.1.1	Deferrisoma	3	0	0	0	0	0	0	0	0	0	0	0	0	0	0	0	0	0	0	0	0	0	0	0	0	0	0	0	0	0	0	0	0	0	0	0	0	0	0	0	0	0	0	0	0	0	0
2	0.1.16	Deinococcota	4	0	0	0	0	0	0	0	0	0	0	0	0	0	0	0	0	0	0	0	0	0	0	0	0	0	0	0	0	0	0	0	0	0	0	0	0	0	0	0	0	0	0	0	0	0	0
3	0.1.16.1	Deinococci	4	0	0	0	0	0	0	0	0	0	0	0	0	0	0	0	0	0	0	0	0	0	0	0	0	0	0	0	0	0	0	0	0	0	0	0	0	0	0	0	0	0	0	0	0	0	0
4	0.1.16.1.1	Deinococcales	1	0	0	0	0	0	0	0	0	0	0	0	0	0	0	0	0	0	0	0	0	0	0	0	0	0	0	0	0	0	0	0	0	0	0	0	0	0	0	0	0	0	0	0	0	0	0
5	0.1.16.1.1.1	Deinococcaceae	1	0	0	0	0	0	0	0	0	0	0	0	0	0	0	0	0	0	0	0	0	0	0	0	0	0	0	0	0	0	0	0	0	0	0	0	0	0	0	0	0	0	0	0	0	0	0
6	0.1.16.1.1.1.1	Deinococcus	1	0	0	0	0	0	0	0	0	0	0	0	0	0	0	0	0	0	0	0	0	0	0	0	0	0	0	0	0	0	0	0	0	0	0	0	0	0	0	0	0	0	0	0	0	0	0
4	0.1.16.1.2	Thermales	3	0	0	0	0	0	0	0	0	0	0	0	0	0	0	0	0	0	0	0	0	0	0	0	0	0	0	0	0	0	0	0	0	0	0	0	0	0	0	0	0	0	0	0	0	0	0
5	0.1.16.1.2.1	Thermaceae	3	0	0	0	0	0	0	0	0	0	0	0	0	0	0	0	0	0	0	0	0	0	0	0	0	0	0	0	0	0	0	0	0	0	0	0	0	0	0	0	0	0	0	0	0	0	0
6	0.1.16.1.2.1.1	Thermus	3	0	0	0	0	0	0	0	0	0	0	0	0	0	0	0	0	0	0	0	0	0	0	0	0	0	0	0	0	0	0	0	0	0	0	0	0	0	0	0	0	0	0	0	0	0	0
2	0.1.17	Dependentiae	1173	0	0	0	0	0	0	0	0	0	0	0	0	0	0	0	0	0	0	0	0	0	0	0	0	0	1	1	1	0	3	0	5	2	0	8	0	0	0	0	4	18	0	13	0	0	13
3	0.1.17.1	Babeliae	1173	0	0	0	0	0	0	0	0	0	0	0	0	0	0	0	0	0	0	0	0	0	0	0	0	0	1	1	1	0	3	0	5	2	0	8	0	0	0	0	4	18	0	13	0	0	13
4	0.1.17.1.1	Babeliales	1173	0	0	0	0	0	0	0	0	0	0	0	0	0	0	0	0	0	0	0	0	0	0	0	0	0	1	1	1	0	3	0	5	2	0	8	0	0	0	0	4	18	0	13	0	0	13
5	0.1.17.1.1.1	Babeliaceae	645	0	0	0	0	0	0	0	0	0	0	0	0	0	0	0	0	0	0	0	0	0	0	0	0	0	1	0	1	0	2	0	5	2	0	4	0	0	0	0	1	0	0	8	0	0	2
6	0.1.17.1.1.1.1	Babeliaceae_ge	6	0	0	0	0	0	0	0	0	0	0	0	0	0	0	0	0	0	0	0	0	0	0	0	0	0	0	0	0	0	0	0	0	0	0	0	0	0	0	0	0	0	0	0	0	0	0
6	0.1.17.1.1.1.2	Babeliaceae_unclassified	36	0	0	0	0	0	0	0	0	0	0	0	0	0	0	0	0	0	0	0	0	0	0	0	0	0	0	0	0	0	0	0	0	0	0	0	0	0	0	0	1	0	0	1	0	0	0
6	0.1.17.1.1.1.3	Candidatus_Babela	603	0	0	0	0	0	0	0	0	0	0	0	0	0	0	0	0	0	0	0	0	0	0	0	0	0	1	0	1	0	2	0	5	2	0	4	0	0	0	0	0	0	0	7	0	0	2
5	0.1.17.1.1.2	Babeliales_fa	176	0	0	0	0	0	0	0	0	0	0	0	0	0	0	0	0	0	0	0	0	0	0	0	0	0	0	0	0	0	0	0	0	0	0	2	0	0	0	0	0	0	0	1	0	0	6
6	0.1.17.1.1.2.1	Babeliales_ge	176	0	0	0	0	0	0	0	0	0	0	0	0	0	0	0	0	0	0	0	0	0	0	0	0	0	0	0	0	0	0	0	0	0	0	2	0	0	0	0	0	0	0	1	0	0	6
5	0.1.17.1.1.3	Babeliales_unclassified	238	0	0	0	0	0	0	0	0	0	0	0	0	0	0	0	0	0	0	0	0	0	0	0	0	0	0	0	0	0	0	0	0	0	0	1	0	0	0	0	3	18	0	3	0	0	4
6	0.1.17.1.1.3.1	Babeliales_unclassified	238	0	0	0	0	0	0	0	0	0	0	0	0	0	0	0	0	0	0	0	0	0	0	0	0	0	0	0	0	0	0	0	0	0	0	1	0	0	0	0	3	18	0	3	0	0	4
5	0.1.17.1.1.4	UBA12409	8	0	0	0	0	0	0	0	0	0	0	0	0	0	0	0	0	0	0	0	0	0	0	0	0	0	0	0	0	0	0	0	0	0	0	0	0	0	0	0	0	0	0	0	0	0	0
6	0.1.17.1.1.4.1	UBA12409_ge	8	0	0	0	0	0	0	0	0	0	0	0	0	0	0	0	0	0	0	0	0	0	0	0	0	0	0	0	0	0	0	0	0	0	0	0	0	0	0	0	0	0	0	0	0	0	0
5	0.1.17.1.1.5	UBA12411	52	0	0	0	0	0	0	0	0	0	0	0	0	0	0	0	0	0	0	0	0	0	0	0	0	0	0	1	0	0	1	0	0	0	0	1	0	0	0	0	0	0	0	0	0	0	0
6	0.1.17.1.1.5.1	UBA12411_ge	52	0	0	0	0	0	0	0	0	0	0	0	0	0	0	0	0	0	0	0	0	0	0	0	0	0	0	1	0	0	1	0	0	0	0	1	0	0	0	0	0	0	0	0	0	0	0
5	0.1.17.1.1.6	Vermiphilaceae	54	0	0	0	0	0	0	0	0	0	0	0	0	0	0	0	0	0	0	0	0	0	0	0	0	0	0	0	0	0	0	0	0	0	0	0	0	0	0	0	0	0	0	1	0	0	1
6	0.1.17.1.1.6.1	Vermiphilaceae_ge	54	0	0	0	0	0	0	0	0	0	0	0	0	0	0	0	0	0	0	0	0	0	0	0	0	0	0	0	0	0	0	0	0	0	0	0	0	0	0	0	0	0	0	1	0	0	1
2	0.1.18	Desulfobacterota	96222	20	0	2	5	13	52	54	41	0	20	0	29	36	12	46	50	168	0	210	77	36	82	29	92	71	38	61	128	124	310	0	373	104	130	190	100	161	260	0	326	74	0	289	90	22	254
3	0.1.18.1	Desulfobacteria	5	0	0	0	0	0	0	0	0	0	0	0	0	0	0	0	0	0	0	0	0	0	0	0	0	0	0	0	0	0	0	0	0	0	0	0	0	0	0	0	0	0	0	0	0	0	0
4	0.1.18.1.1	Desulfobacterales	5	0	0	0	0	0	0	0	0	0	0	0	0	0	0	0	0	0	0	0	0	0	0	0	0	0	0	0	0	0	0	0	0	0	0	0	0	0	0	0	0	0	0	0	0	0	0
5	0.1.18.1.1.1	Desulfobacterales_fa	1	0	0	0	0	0	0	0	0	0	0	0	0	0	0	0	0	0	0	0	0	0	0	0	0	0	0	0	0	0	0	0	0	0	0	0	0	0	0	0	0	0	0	0	0	0	0
6	0.1.18.1.1.1.1	Desulfobacterales_ge	1	0	0	0	0	0	0	0	0	0	0	0	0	0	0	0	0	0	0	0	0	0	0	0	0	0	0	0	0	0	0	0	0	0	0	0	0	0	0	0	0	0	0	0	0	0	0
5	0.1.18.1.1.2	Desulfobacterales_unclassified	3	0	0	0	0	0	0	0	0	0	0	0	0	0	0	0	0	0	0	0	0	0	0	0	0	0	0	0	0	0	0	0	0	0	0	0	0	0	0	0	0	0	0	0	0	0	0
6	0.1.18.1.1.2.1	Desulfobacterales_unclassified	3	0	0	0	0	0	0	0	0	0	0	0	0	0	0	0	0	0	0	0	0	0	0	0	0	0	0	0	0	0	0	0	0	0	0	0	0	0	0	0	0	0	0	0	0	0	0
5	0.1.18.1.1.3	Desulfosarcinaceae	1	0	0	0	0	0	0	0	0	0	0	0	0	0	0	0	0	0	0	0	0	0	0	0	0	0	0	0	0	0	0	0	0	0	0	0	0	0	0	0	0	0	0	0	0	0	0
6	0.1.18.1.1.3.1	Desulfosarcinaceae_unclassified	1	0	0	0	0	0	0	0	0	0	0	0	0	0	0	0	0	0	0	0	0	0	0	0	0	0	0	0	0	0	0	0	0	0	0	0	0	0	0	0	0	0	0	0	0	0	0
3	0.1.18.2	Desulfobacterota_unclassified	17153	0	0	0	2	3	9	1	8	0	0	0	8	0	1	10	14	12	0	53	1	0	5	1	16	11	6	7	23	7	37	0	37	8	8	29	15	35	78	0	74	13	0	68	24	6	65
4	0.1.18.2.1	Desulfobacterota_unclassified	17153	0	0	0	2	3	9	1	8	0	0	0	8	0	1	10	14	12	0	53	1	0	5	1	16	11	6	7	23	7	37	0	37	8	8	29	15	35	78	0	74	13	0	68	24	6	65
5	0.1.18.2.1.1	Desulfobacterota_unclassified	17153	0	0	0	2	3	9	1	8	0	0	0	8	0	1	10	14	12	0	53	1	0	5	1	16	11	6	7	23	7	37	0	37	8	8	29	15	35	78	0	74	13	0	68	24	6	65
6	0.1.18.2.1.1.1	Desulfobacterota_unclassified	17153	0	0	0	2	3	9	1	8	0	0	0	8	0	1	10	14	12	0	53	1	0	5	1	16	11	6	7	23	7	37	0	37	8	8	29	15	35	78	0	74	13	0	68	24	6	65
3	0.1.18.3	Desulfobulbia	2603	0	0	0	0	1	4	12	2	0	2	0	2	4	0	1	1	21	0	0	2	2	1	3	6	6	1	4	0	6	34	0	19	2	8	14	1	6	3	0	1	0	0	6	1	1	3
4	0.1.18.3.1	Desulfobulbales	2603	0	0	0	0	1	4	12	2	0	2	0	2	4	0	1	1	21	0	0	2	2	1	3	6	6	1	4	0	6	34	0	19	2	8	14	1	6	3	0	1	0	0	6	1	1	3
5	0.1.18.3.1.1	Desulfobulbaceae	212	0	0	0	0	1	4	11	0	0	2	0	1	4	0	1	1	21	0	0	1	2	0	3	6	6	1	4	0	2	34	0	18	2	6	3	0	0	0	0	0	0	0	0	0	0	0
6	0.1.18.3.1.1.1	Candidatus_Electronema	1	0	0	0	0	0	0	0	0	0	0	0	0	0	0	0	0	0	0	0	0	0	0	0	0	0	0	0	0	0	0	0	0	0	0	0	0	0	0	0	0	0	0	0	0	0	0
6	0.1.18.3.1.1.2	Desulfobulbaceae_ge	1	0	0	0	0	0	0	0	0	0	0	0	0	0	0	0	0	0	0	0	0	0	0	0	0	0	0	0	0	0	0	0	0	0	0	0	0	0	0	0	0	0	0	0	0	0	0
6	0.1.18.3.1.1.3	Desulfobulbaceae_unclassified	11	0	0	0	0	0	0	0	0	0	0	0	0	0	0	0	0	0	0	0	0	0	0	0	0	0	0	0	0	0	2	0	0	0	1	0	0	0	0	0	0	0	0	0	0	0	0
6	0.1.18.3.1.1.4	Desulfobulbus	199	0	0	0	0	1	4	11	0	0	2	0	1	4	0	1	1	21	0	0	1	2	0	3	6	6	1	4	0	2	32	0	18	2	5	3	0	0	0	0	0	0	0	0	0	0	0
5	0.1.18.3.1.2	Desulfobulbales_unclassified	2341	0	0	0	0	0	0	1	2	0	0	0	1	0	0	0	0	0	0	0	1	0	1	0	0	0	0	0	0	4	0	0	1	0	2	11	1	6	2	0	1	0	0	5	1	1	3
6	0.1.18.3.1.2.1	Desulfobulbales_unclassified	2341	0	0	0	0	0	0	1	2	0	0	0	1	0	0	0	0	0	0	0	1	0	1	0	0	0	0	0	0	4	0	0	1	0	2	11	1	6	2	0	1	0	0	5	1	1	3
5	0.1.18.3.1.3	Desulfocapsaceae	50	0	0	0	0	0	0	0	0	0	0	0	0	0	0	0	0	0	0	0	0	0	0	0	0	0	0	0	0	0	0	0	0	0	0	0	0	0	1	0	0	0	0	1	0	0	0
6	0.1.18.3.1.3.1	Desulfocapsaceae_unclassified	44	0	0	0	0	0	0	0	0	0	0	0	0	0	0	0	0	0	0	0	0	0	0	0	0	0	0	0	0	0	0	0	0	0	0	0	0	0	1	0	0	0	0	1	0	0	0
6	0.1.18.3.1.3.2	Desulfoprunum	6	0	0	0	0	0	0	0	0	0	0	0	0	0	0	0	0	0	0	0	0	0	0	0	0	0	0	0	0	0	0	0	0	0	0	0	0	0	0	0	0	0	0	0	0	0	0
3	0.1.18.4	Desulfovibrionia	5856	17	0	0	0	1	6	8	15	0	18	0	7	9	6	9	12	59	0	39	51	24	46	14	28	15	6	14	14	19	104	0	107	48	57	22	37	0	1	0	1	3	0	1	0	1	1
4	0.1.18.4.1	Desulfovibrionales	5856	17	0	0	0	1	6	8	15	0	18	0	7	9	6	9	12	59	0	39	51	24	46	14	28	15	6	14	14	19	104	0	107	48	57	22	37	0	1	0	1	3	0	1	0	1	1
5	0.1.18.4.1.1	Desulfovibrionaceae	5199	17	0	0	0	1	6	8	15	0	18	0	7	9	6	8	12	57	0	38	51	24	46	14	28	15	6	14	13	19	104	0	103	48	57	21	37	0	1	0	1	3	0	1	0	1	1
6	0.1.18.4.1.1.1	Bilophila	189	0	0	0	0	0	0	0	0	0	0	0	0	0	0	0	0	0	0	3	1	0	0	0	0	0	0	0	0	0	2	0	0	5	0	0	0	0	0	0	0	0	0	0	0	0	0
6	0.1.18.4.1.1.2	Desulfovibrio	2031	15	0	0	0	0	0	6	2	0	11	0	2	5	2	3	6	28	0	20	25	16	29	4	12	5	5	2	3	11	73	0	80	27	42	10	20	0	0	0	1	1	0	0	0	1	0
6	0.1.18.4.1.1.3	Desulfovibrionaceae_unclassified	643	0	0	0	0	0	4	0	0	0	1	0	0	0	0	1	2	5	0	3	6	0	0	0	0	0	0	5	4	1	8	0	14	0	0	1	0	0	1	0	0	0	0	0	0	0	0
6	0.1.18.4.1.1.4	Mailhella	2252	2	0	0	0	1	2	2	13	0	6	0	5	4	4	4	3	22	0	12	19	8	16	10	16	10	1	7	6	7	21	0	9	16	15	10	16	0	0	0	0	2	0	1	0	0	1
6	0.1.18.4.1.1.5	uncultured	84	0	0	0	0	0	0	0	0	0	0	0	0	0	0	0	1	2	0	0	0	0	1	0	0	0	0	0	0	0	0	0	0	0	0	0	1	0	0	0	0	0	0	0	0	0	0
5	0.1.18.4.1.2	Desulfovibrionales_unclassified	657	0	0	0	0	0	0	0	0	0	0	0	0	0	0	1	0	2	0	1	0	0	0	0	0	0	0	0	1	0	0	0	4	0	0	1	0	0	0	0	0	0	0	0	0	0	0
6	0.1.18.4.1.2.1	Desulfovibrionales_unclassified	657	0	0	0	0	0	0	0	0	0	0	0	0	0	0	1	0	2	0	1	0	0	0	0	0	0	0	0	1	0	0	0	4	0	0	1	0	0	0	0	0	0	0	0	0	0	0
3	0.1.18.5	Desulfuromonadia	39973	1	0	2	2	2	20	30	9	0	0	0	7	20	2	13	18	52	0	88	15	7	22	8	19	24	18	21	54	63	86	0	154	31	43	49	30	68	107	0	136	0	0	135	41	7	107
4	0.1.18.5.1	Bradymonadales	1025	0	0	0	0	1	1	21	2	0	0	0	2	17	0	3	6	13	0	11	5	7	13	4	2	3	8	1	7	34	27	0	50	4	34	5	7	0	0	0	0	0	0	1	0	0	2
5	0.1.18.5.1.1	Bradymonadales_fa	1023	0	0	0	0	1	1	21	2	0	0	0	2	17	0	3	6	13	0	11	5	7	13	4	2	3	8	1	7	34	27	0	50	4	34	5	7	0	0	0	0	0	0	1	0	0	2
6	0.1.18.5.1.1.1	Bradymonadales_ge	1023	0	0	0	0	1	1	21	2	0	0	0	2	17	0	3	6	13	0	11	5	7	13	4	2	3	8	1	7	34	27	0	50	4	34	5	7	0	0	0	0	0	0	1	0	0	2
5	0.1.18.5.1.2	Bradymonadales_unclassified	2	0	0	0	0	0	0	0	0	0	0	0	0	0	0	0	0	0	0	0	0	0	0	0	0	0	0	0	0	0	0	0	0	0	0	0	0	0	0	0	0	0	0	0	0	0	0
6	0.1.18.5.1.2.1	Bradymonadales_unclassified	2	0	0	0	0	0	0	0	0	0	0	0	0	0	0	0	0	0	0	0	0	0	0	0	0	0	0	0	0	0	0	0	0	0	0	0	0	0	0	0	0	0	0	0	0	0	0
4	0.1.18.5.2	Desulfuromonadales	30163	1	0	2	1	0	15	6	2	0	0	0	5	2	1	4	5	25	0	51	7	0	7	4	16	15	5	15	29	18	51	0	67	14	4	37	9	50	90	0	101	0	0	103	32	5	83
5	0.1.18.5.2.1	C8S-102	2	0	0	0	0	0	0	0	0	0	0	0	0	0	0	0	0	0	0	0	0	0	0	0	0	0	0	0	0	0	0	0	0	0	0	0	0	0	0	0	0	0	0	0	0	0	0
6	0.1.18.5.2.1.1	C8S-102_ge	2	0	0	0	0	0	0	0	0	0	0	0	0	0	0	0	0	0	0	0	0	0	0	0	0	0	0	0	0	0	0	0	0	0	0	0	0	0	0	0	0	0	0	0	0	0	0
5	0.1.18.5.2.2	Desulfuromonadaceae	102	0	0	0	0	0	1	0	0	0	0	0	0	0	0	0	0	0	0	9	0	0	0	0	0	0	0	0	0	2	0	0	0	0	0	0	0	0	0	0	0	0	0	1	5	0	0
6	0.1.18.5.2.2.1	Candidatus_Deferrimonas	13	0	0	0	0	0	1	0	0	0	0	0	0	0	0	0	0	0	0	0	0	0	0	0	0	0	0	0	0	0	0	0	0	0	0	0	0	0	0	0	0	0	0	0	0	0	0
6	0.1.18.5.2.2.2	Desulfuromonadaceae_ge	43	0	0	0	0	0	0	0	0	0	0	0	0	0	0	0	0	0	0	9	0	0	0	0	0	0	0	0	0	0	0	0	0	0	0	0	0	0	0	0	0	0	0	0	0	0	0
6	0.1.18.5.2.2.3	Desulfuromonadaceae_unclassified	42	0	0	0	0	0	0	0	0	0	0	0	0	0	0	0	0	0	0	0	0	0	0	0	0	0	0	0	0	2	0	0	0	0	0	0	0	0	0	0	0	0	0	1	5	0	0
6	0.1.18.5.2.2.4	Desulfuromonas	3	0	0	0	0	0	0	0	0	0	0	0	0	0	0	0	0	0	0	0	0	0	0	0	0	0	0	0	0	0	0	0	0	0	0	0	0	0	0	0	0	0	0	0	0	0	0
6	0.1.18.5.2.2.5	Trichloromonas	1	0	0	0	0	0	0	0	0	0	0	0	0	0	0	0	0	0	0	0	0	0	0	0	0	0	0	0	0	0	0	0	0	0	0	0	0	0	0	0	0	0	0	0	0	0	0
5	0.1.18.5.2.3	Desulfuromonadales_fa	178	0	0	0	0	0	0	0	0	0	0	0	0	0	0	0	0	0	0	1	0	0	0	0	0	0	0	0	0	0	2	0	3	0	0	0	0	0	0	0	0	0	0	0	0	0	1
6	0.1.18.5.2.3.1	Desulfuromonadales_ge	178	0	0	0	0	0	0	0	0	0	0	0	0	0	0	0	0	0	0	1	0	0	0	0	0	0	0	0	0	0	2	0	3	0	0	0	0	0	0	0	0	0	0	0	0	0	1
5	0.1.18.5.2.4	Desulfuromonadales_unclassified	29805	1	0	2	1	0	14	6	2	0	0	0	5	2	1	4	5	25	0	41	7	0	7	4	16	15	5	15	29	16	49	0	62	14	4	37	9	50	90	0	101	0	0	102	27	5	82
6	0.1.18.5.2.4.1	Desulfuromonadales_unclassified	29805	1	0	2	1	0	14	6	2	0	0	0	5	2	1	4	5	25	0	41	7	0	7	4	16	15	5	15	29	16	49	0	62	14	4	37	9	50	90	0	101	0	0	102	27	5	82
5	0.1.18.5.2.5	Geoalkalibacteraceae	7	0	0	0	0	0	0	0	0	0	0	0	0	0	0	0	0	0	0	0	0	0	0	0	0	0	0	0	0	0	0	0	0	0	0	0	0	0	0	0	0	0	0	0	0	0	0
6	0.1.18.5.2.5.1	Geoalkalibacter	7	0	0	0	0	0	0	0	0	0	0	0	0	0	0	0	0	0	0	0	0	0	0	0	0	0	0	0	0	0	0	0	0	0	0	0	0	0	0	0	0	0	0	0	0	0	0
5	0.1.18.5.2.6	Geothermobacteraceae	6	0	0	0	0	0	0	0	0	0	0	0	0	0	0	0	0	0	0	0	0	0	0	0	0	0	0	0	0	0	0	0	0	0	0	0	0	0	0	0	0	0	0	0	0	0	0
6	0.1.18.5.2.6.1	Geothermobacter	6	0	0	0	0	0	0	0	0	0	0	0	0	0	0	0	0	0	0	0	0	0	0	0	0	0	0	0	0	0	0	0	0	0	0	0	0	0	0	0	0	0	0	0	0	0	0
5	0.1.18.5.2.7	MA-28-I98C	36	0	0	0	0	0	0	0	0	0	0	0	0	0	0	0	0	0	0	0	0	0	0	0	0	0	0	0	0	0	0	0	0	0	0	0	0	0	0	0	0	0	0	0	0	0	0
6	0.1.18.5.2.7.1	MA-28-I98C_ge	36	0	0	0	0	0	0	0	0	0	0	0	0	0	0	0	0	0	0	0	0	0	0	0	0	0	0	0	0	0	0	0	0	0	0	0	0	0	0	0	0	0	0	0	0	0	0
5	0.1.18.5.2.8	Sva1033	2	0	0	0	0	0	0	0	0	0	0	0	0	0	0	0	0	0	0	0	0	0	0	0	0	0	0	0	0	0	0	0	0	0	0	0	0	0	0	0	0	0	0	0	0	0	0
6	0.1.18.5.2.8.1	Sva1033_ge	2	0	0	0	0	0	0	0	0	0	0	0	0	0	0	0	0	0	0	0	0	0	0	0	0	0	0	0	0	0	0	0	0	0	0	0	0	0	0	0	0	0	0	0	0	0	0
5	0.1.18.5.2.9	Syntrophotaleaceae	22	0	0	0	0	0	0	0	0	0	0	0	0	0	0	0	0	0	0	0	0	0	0	0	0	0	0	0	0	0	0	0	2	0	0	0	0	0	0	0	0	0	0	0	0	0	0
6	0.1.18.5.2.9.1	Syntrophotalea	22	0	0	0	0	0	0	0	0	0	0	0	0	0	0	0	0	0	0	0	0	0	0	0	0	0	0	0	0	0	0	0	2	0	0	0	0	0	0	0	0	0	0	0	0	0	0
5	0.1.18.5.2.10	uncultured	3	0	0	0	0	0	0	0	0	0	0	0	0	0	0	0	0	0	0	0	0	0	0	0	0	0	0	0	0	0	0	0	0	0	0	0	0	0	0	0	0	0	0	0	0	0	0
6	0.1.18.5.2.10.1	uncultured_ge	3	0	0	0	0	0	0	0	0	0	0	0	0	0	0	0	0	0	0	0	0	0	0	0	0	0	0	0	0	0	0	0	0	0	0	0	0	0	0	0	0	0	0	0	0	0	0
4	0.1.18.5.3	Desulfuromonadia_or	16	0	0	0	0	0	0	0	0	0	0	0	0	0	0	0	0	0	0	0	0	0	0	0	0	0	0	0	0	0	0	0	0	0	1	0	0	0	1	0	0	0	0	0	0	0	0
5	0.1.18.5.3.1	Desulfuromonadia_fa	16	0	0	0	0	0	0	0	0	0	0	0	0	0	0	0	0	0	0	0	0	0	0	0	0	0	0	0	0	0	0	0	0	0	1	0	0	0	1	0	0	0	0	0	0	0	0
6	0.1.18.5.3.1.1	Desulfuromonadia_ge	16	0	0	0	0	0	0	0	0	0	0	0	0	0	0	0	0	0	0	0	0	0	0	0	0	0	0	0	0	0	0	0	0	0	1	0	0	0	1	0	0	0	0	0	0	0	0
4	0.1.18.5.4	Desulfuromonadia_unclassified	3655	0	0	0	0	0	2	2	3	0	0	0	0	1	1	3	3	10	0	19	0	0	2	0	0	4	4	5	8	3	2	0	33	6	2	1	8	9	7	0	27	0	0	17	2	2	12
5	0.1.18.5.4.1	Desulfuromonadia_unclassified	3655	0	0	0	0	0	2	2	3	0	0	0	0	1	1	3	3	10	0	19	0	0	2	0	0	4	4	5	8	3	2	0	33	6	2	1	8	9	7	0	27	0	0	17	2	2	12
6	0.1.18.5.4.1.1	Desulfuromonadia_unclassified	3655	0	0	0	0	0	2	2	3	0	0	0	0	1	1	3	3	10	0	19	0	0	2	0	0	4	4	5	8	3	2	0	33	6	2	1	8	9	7	0	27	0	0	17	2	2	12
4	0.1.18.5.5	Geobacterales	5095	0	0	0	1	1	2	1	2	0	0	0	0	0	0	3	4	4	0	7	3	0	0	0	1	2	1	0	10	8	6	0	4	7	2	6	6	9	9	0	8	0	0	14	7	0	10
5	0.1.18.5.5.1	Geobacteraceae	2854	0	0	0	0	1	0	1	2	0	0	0	0	0	0	2	2	4	0	4	3	0	0	0	0	2	1	0	3	8	0	0	3	5	2	4	2	8	9	0	4	0	0	11	6	0	7
6	0.1.18.5.5.1.1	Citrifermentans	14	0	0	0	0	0	0	0	0	0	0	0	0	0	0	0	0	0	0	0	0	0	0	0	0	0	0	0	0	0	0	0	0	0	0	0	0	0	0	0	0	0	0	0	0	0	0
6	0.1.18.5.5.1.2	Geobacter	17	0	0	0	0	0	0	0	0	0	0	0	0	0	0	0	0	0	0	0	0	0	0	0	0	0	0	0	0	0	0	0	0	0	0	0	0	0	0	0	0	0	0	0	0	0	2
6	0.1.18.5.5.1.3	Geobacteraceae_ge	10	0	0	0	0	0	0	0	0	0	0	0	0	0	0	0	0	0	0	0	0	0	0	0	0	0	0	0	0	0	0	0	0	0	0	0	0	0	0	0	0	0	0	0	0	0	0
6	0.1.18.5.5.1.4	Geobacteraceae_unclassified	1953	0	0	0	0	1	0	1	1	0	0	0	0	0	0	2	1	2	0	4	2	0	0	0	0	2	1	0	2	4	0	0	3	4	1	3	2	0	1	0	0	0	0	7	1	0	0
6	0.1.18.5.5.1.5	Geotalea	793	0	0	0	0	0	0	0	1	0	0	0	0	0	0	0	1	2	0	0	1	0	0	0	0	0	0	0	1	4	0	0	0	1	1	1	0	8	8	0	4	0	0	4	5	0	5
6	0.1.18.5.5.1.6	Trichlorobacter	12	0	0	0	0	0	0	0	0	0	0	0	0	0	0	0	0	0	0	0	0	0	0	0	0	0	0	0	0	0	0	0	0	0	0	0	0	0	0	0	0	0	0	0	0	0	0
6	0.1.18.5.5.1.7	uncultured	55	0	0	0	0	0	0	0	0	0	0	0	0	0	0	0	0	0	0	0	0	0	0	0	0	0	0	0	0	0	0	0	0	0	0	0	0	0	0	0	0	0	0	0	0	0	0
5	0.1.18.5.5.2	Geobacterales_unclassified	420	0	0	0	0	0	0	0	0	0	0	0	0	0	0	1	1	0	0	1	0	0	0	0	1	0	0	0	7	0	2	0	0	2	0	0	0	1	0	0	1	0	0	2	0	0	2
6	0.1.18.5.5.2.1	Geobacterales_unclassified	420	0	0	0	0	0	0	0	0	0	0	0	0	0	0	1	1	0	0	1	0	0	0	0	1	0	0	0	7	0	2	0	0	2	0	0	0	1	0	0	1	0	0	2	0	0	2
5	0.1.18.5.5.3	Pseudopelobacteraceae	1821	0	0	0	1	0	2	0	0	0	0	0	0	0	0	0	1	0	0	2	0	0	0	0	0	0	0	0	0	0	4	0	1	0	0	2	4	0	0	0	3	0	0	1	1	0	1
6	0.1.18.5.5.3.1	Pseudopelobacter	1821	0	0	0	1	0	2	0	0	0	0	0	0	0	0	0	1	0	0	2	0	0	0	0	0	0	0	0	0	0	4	0	1	0	0	2	4	0	0	0	3	0	0	1	1	0	1
4	0.1.18.5.6	PB19	19	0	0	0	0	0	0	0	0	0	0	0	0	0	0	0	0	0	0	0	0	0	0	0	0	0	0	0	0	0	0	0	0	0	0	0	0	0	0	0	0	0	0	0	0	0	0
5	0.1.18.5.6.1	PB19_fa	19	0	0	0	0	0	0	0	0	0	0	0	0	0	0	0	0	0	0	0	0	0	0	0	0	0	0	0	0	0	0	0	0	0	0	0	0	0	0	0	0	0	0	0	0	0	0
6	0.1.18.5.6.1.1	PB19_ge	19	0	0	0	0	0	0	0	0	0	0	0	0	0	0	0	0	0	0	0	0	0	0	0	0	0	0	0	0	0	0	0	0	0	0	0	0	0	0	0	0	0	0	0	0	0	0
3	0.1.18.6	Dissulfuribacteria	80	0	0	0	0	0	0	0	0	0	0	0	0	0	0	0	0	0	0	0	0	0	0	0	0	0	0	0	0	0	0	0	0	0	0	0	0	0	0	0	0	0	0	0	1	0	0
4	0.1.18.6.1	Dissulfuribacterales	80	0	0	0	0	0	0	0	0	0	0	0	0	0	0	0	0	0	0	0	0	0	0	0	0	0	0	0	0	0	0	0	0	0	0	0	0	0	0	0	0	0	0	0	1	0	0
5	0.1.18.6.1.1	Dissulfuribacteraceae	80	0	0	0	0	0	0	0	0	0	0	0	0	0	0	0	0	0	0	0	0	0	0	0	0	0	0	0	0	0	0	0	0	0	0	0	0	0	0	0	0	0	0	0	1	0	0
6	0.1.18.6.1.1.1	Dissulfuribacter	12	0	0	0	0	0	0	0	0	0	0	0	0	0	0	0	0	0	0	0	0	0	0	0	0	0	0	0	0	0	0	0	0	0	0	0	0	0	0	0	0	0	0	0	0	0	0
6	0.1.18.6.1.1.2	Dissulfuribacteraceae_unclassified	63	0	0	0	0	0	0	0	0	0	0	0	0	0	0	0	0	0	0	0	0	0	0	0	0	0	0	0	0	0	0	0	0	0	0	0	0	0	0	0	0	0	0	0	1	0	0
6	0.1.18.6.1.1.3	Dissulfurimicrobium	5	0	0	0	0	0	0	0	0	0	0	0	0	0	0	0	0	0	0	0	0	0	0	0	0	0	0	0	0	0	0	0	0	0	0	0	0	0	0	0	0	0	0	0	0	0	0
3	0.1.18.7	Syntrophobacteria	22	0	0	0	0	0	0	0	0	0	0	0	0	0	0	0	0	0	0	0	0	0	0	0	0	0	0	0	0	0	0	0	0	0	0	0	0	0	0	0	0	0	0	0	0	0	0
4	0.1.18.7.1	Syntrophobacterales	22	0	0	0	0	0	0	0	0	0	0	0	0	0	0	0	0	0	0	0	0	0	0	0	0	0	0	0	0	0	0	0	0	0	0	0	0	0	0	0	0	0	0	0	0	0	0
5	0.1.18.7.1.1	Syntrophobacteraceae	22	0	0	0	0	0	0	0	0	0	0	0	0	0	0	0	0	0	0	0	0	0	0	0	0	0	0	0	0	0	0	0	0	0	0	0	0	0	0	0	0	0	0	0	0	0	0
6	0.1.18.7.1.1.1	Desulfovirga	1	0	0	0	0	0	0	0	0	0	0	0	0	0	0	0	0	0	0	0	0	0	0	0	0	0	0	0	0	0	0	0	0	0	0	0	0	0	0	0	0	0	0	0	0	0	0
6	0.1.18.7.1.1.2	Syntrophobacteraceae_unclassified	21	0	0	0	0	0	0	0	0	0	0	0	0	0	0	0	0	0	0	0	0	0	0	0	0	0	0	0	0	0	0	0	0	0	0	0	0	0	0	0	0	0	0	0	0	0	0
3	0.1.18.8	uncultured	30530	2	0	0	1	6	13	3	7	0	0	0	5	3	3	13	5	24	0	30	8	3	8	3	23	15	7	15	37	29	49	0	56	15	14	76	17	52	71	0	114	58	0	79	23	7	78
4	0.1.18.8.1	uncultured_or	30530	2	0	0	1	6	13	3	7	0	0	0	5	3	3	13	5	24	0	30	8	3	8	3	23	15	7	15	37	29	49	0	56	15	14	76	17	52	71	0	114	58	0	79	23	7	78
5	0.1.18.8.1.1	uncultured_fa	30530	2	0	0	1	6	13	3	7	0	0	0	5	3	3	13	5	24	0	30	8	3	8	3	23	15	7	15	37	29	49	0	56	15	14	76	17	52	71	0	114	58	0	79	23	7	78
6	0.1.18.8.1.1.1	uncultured_ge	30530	2	0	0	1	6	13	3	7	0	0	0	5	3	3	13	5	24	0	30	8	3	8	3	23	15	7	15	37	29	49	0	56	15	14	76	17	52	71	0	114	58	0	79	23	7	78
2	0.1.19	Elusimicrobiota	2251	3	0	0	1	10	28	7	3	0	12	0	27	2	8	0	2	40	0	48	13	25	64	61	31	20	10	33	28	8	96	0	11	22	66	6	63	3	13	0	0	2	0	5	0	1	8
3	0.1.19.1	Elusimicrobia	981	1	0	0	1	1	2	7	3	0	7	0	9	0	8	0	2	5	0	22	10	15	17	59	19	20	10	32	8	7	77	0	9	5	18	6	37	1	1	0	0	0	0	1	0	1	1
4	0.1.19.1.1	Elusimicrobia_unclassified	2	0	0	0	0	0	0	0	0	0	0	0	0	0	0	0	0	0	0	0	0	0	0	0	0	0	0	0	0	1	0	0	0	0	0	0	0	0	0	0	0	0	0	0	0	0	0
5	0.1.19.1.1.1	Elusimicrobia_unclassified	2	0	0	0	0	0	0	0	0	0	0	0	0	0	0	0	0	0	0	0	0	0	0	0	0	0	0	0	0	1	0	0	0	0	0	0	0	0	0	0	0	0	0	0	0	0	0
6	0.1.19.1.1.1.1	Elusimicrobia_unclassified	2	0	0	0	0	0	0	0	0	0	0	0	0	0	0	0	0	0	0	0	0	0	0	0	0	0	0	0	0	1	0	0	0	0	0	0	0	0	0	0	0	0	0	0	0	0	0
4	0.1.19.1.2	Elusimicrobiales	952	1	0	0	1	1	2	7	3	0	7	0	9	0	8	0	2	5	0	22	10	15	17	59	18	20	10	32	8	6	76	0	9	5	18	6	37	1	1	0	0	0	0	1	0	1	1
5	0.1.19.1.2.1	Elusimicrobiaceae	952	1	0	0	1	1	2	7	3	0	7	0	9	0	8	0	2	5	0	22	10	15	17	59	18	20	10	32	8	6	76	0	9	5	18	6	37	1	1	0	0	0	0	1	0	1	1
6	0.1.19.1.2.1.1	Elusimicrobium	952	1	0	0	1	1	2	7	3	0	7	0	9	0	8	0	2	5	0	22	10	15	17	59	18	20	10	32	8	6	76	0	9	5	18	6	37	1	1	0	0	0	0	1	0	1	1
4	0.1.19.1.3	Lineage_IV	17	0	0	0	0	0	0	0	0	0	0	0	0	0	0	0	0	0	0	0	0	0	0	0	0	0	0	0	0	0	0	0	0	0	0	0	0	0	0	0	0	0	0	0	0	0	0
5	0.1.19.1.3.1	Lineage_IV_fa	17	0	0	0	0	0	0	0	0	0	0	0	0	0	0	0	0	0	0	0	0	0	0	0	0	0	0	0	0	0	0	0	0	0	0	0	0	0	0	0	0	0	0	0	0	0	0
6	0.1.19.1.3.1.1	Lineage_IV_ge	17	0	0	0	0	0	0	0	0	0	0	0	0	0	0	0	0	0	0	0	0	0	0	0	0	0	0	0	0	0	0	0	0	0	0	0	0	0	0	0	0	0	0	0	0	0	0
4	0.1.19.1.4	MD2894-B20	1	0	0	0	0	0	0	0	0	0	0	0	0	0	0	0	0	0	0	0	0	0	0	0	1	0	0	0	0	0	0	0	0	0	0	0	0	0	0	0	0	0	0	0	0	0	0
5	0.1.19.1.4.1	MD2894-B20_fa	1	0	0	0	0	0	0	0	0	0	0	0	0	0	0	0	0	0	0	0	0	0	0	0	1	0	0	0	0	0	0	0	0	0	0	0	0	0	0	0	0	0	0	0	0	0	0
6	0.1.19.1.4.1.1	MD2894-B20_ge	1	0	0	0	0	0	0	0	0	0	0	0	0	0	0	0	0	0	0	0	0	0	0	0	1	0	0	0	0	0	0	0	0	0	0	0	0	0	0	0	0	0	0	0	0	0	0
4	0.1.19.1.5	MVP-88	9	0	0	0	0	0	0	0	0	0	0	0	0	0	0	0	0	0	0	0	0	0	0	0	0	0	0	0	0	0	1	0	0	0	0	0	0	0	0	0	0	0	0	0	0	0	0
5	0.1.19.1.5.1	MVP-88_fa	9	0	0	0	0	0	0	0	0	0	0	0	0	0	0	0	0	0	0	0	0	0	0	0	0	0	0	0	0	0	1	0	0	0	0	0	0	0	0	0	0	0	0	0	0	0	0
6	0.1.19.1.5.1.1	MVP-88_ge	9	0	0	0	0	0	0	0	0	0	0	0	0	0	0	0	0	0	0	0	0	0	0	0	0	0	0	0	0	0	1	0	0	0	0	0	0	0	0	0	0	0	0	0	0	0	0
3	0.1.19.2	Elusimicrobiota_cl	1	0	0	0	0	0	0	0	0	0	0	0	0	0	0	0	0	0	0	0	0	0	0	0	0	0	0	0	0	0	0	0	0	0	0	0	0	0	0	0	0	0	0	0	0	0	0
4	0.1.19.2.1	Elusimicrobiota_or	1	0	0	0	0	0	0	0	0	0	0	0	0	0	0	0	0	0	0	0	0	0	0	0	0	0	0	0	0	0	0	0	0	0	0	0	0	0	0	0	0	0	0	0	0	0	0
5	0.1.19.2.1.1	Elusimicrobiota_fa	1	0	0	0	0	0	0	0	0	0	0	0	0	0	0	0	0	0	0	0	0	0	0	0	0	0	0	0	0	0	0	0	0	0	0	0	0	0	0	0	0	0	0	0	0	0	0
6	0.1.19.2.1.1.1	Elusimicrobiota_ge	1	0	0	0	0	0	0	0	0	0	0	0	0	0	0	0	0	0	0	0	0	0	0	0	0	0	0	0	0	0	0	0	0	0	0	0	0	0	0	0	0	0	0	0	0	0	0
3	0.1.19.3	Elusimicrobiota_unclassified	33	0	0	0	0	1	2	0	0	0	0	0	0	0	0	0	0	0	0	0	0	0	0	0	0	0	0	0	1	1	0	0	0	0	0	0	2	0	0	0	0	0	0	0	0	0	0
4	0.1.19.3.1	Elusimicrobiota_unclassified	33	0	0	0	0	1	2	0	0	0	0	0	0	0	0	0	0	0	0	0	0	0	0	0	0	0	0	0	1	1	0	0	0	0	0	0	2	0	0	0	0	0	0	0	0	0	0
5	0.1.19.3.1.1	Elusimicrobiota_unclassified	33	0	0	0	0	1	2	0	0	0	0	0	0	0	0	0	0	0	0	0	0	0	0	0	0	0	0	0	1	1	0	0	0	0	0	0	2	0	0	0	0	0	0	0	0	0	0
6	0.1.19.3.1.1.1	Elusimicrobiota_unclassified	33	0	0	0	0	1	2	0	0	0	0	0	0	0	0	0	0	0	0	0	0	0	0	0	0	0	0	0	1	1	0	0	0	0	0	0	2	0	0	0	0	0	0	0	0	0	0
3	0.1.19.4	Endomicrobia	753	2	0	0	0	8	24	0	0	0	5	0	18	2	0	0	0	35	0	23	3	9	47	2	12	0	0	1	19	0	17	0	2	17	47	0	21	1	12	0	0	2	0	0	0	0	1
4	0.1.19.4.1	Endomicrobiales	753	2	0	0	0	8	24	0	0	0	5	0	18	2	0	0	0	35	0	23	3	9	47	2	12	0	0	1	19	0	17	0	2	17	47	0	21	1	12	0	0	2	0	0	0	0	1
5	0.1.19.4.1.1	Endomicrobiaceae	753	2	0	0	0	8	24	0	0	0	5	0	18	2	0	0	0	35	0	23	3	9	47	2	12	0	0	1	19	0	17	0	2	17	47	0	21	1	12	0	0	2	0	0	0	0	1
6	0.1.19.4.1.1.1	Endomicrobium	753	2	0	0	0	8	24	0	0	0	5	0	18	2	0	0	0	35	0	23	3	9	47	2	12	0	0	1	19	0	17	0	2	17	47	0	21	1	12	0	0	2	0	0	0	0	1
3	0.1.19.5	Lineage_IIa	403	0	0	0	0	0	0	0	0	0	0	0	0	0	0	0	0	0	0	3	0	1	0	0	0	0	0	0	0	0	2	0	0	0	0	0	3	1	0	0	0	0	0	3	0	0	6
4	0.1.19.5.1	Lineage_IIa_or	403	0	0	0	0	0	0	0	0	0	0	0	0	0	0	0	0	0	0	3	0	1	0	0	0	0	0	0	0	0	2	0	0	0	0	0	3	1	0	0	0	0	0	3	0	0	6
5	0.1.19.5.1.1	Lineage_IIa_fa	403	0	0	0	0	0	0	0	0	0	0	0	0	0	0	0	0	0	0	3	0	1	0	0	0	0	0	0	0	0	2	0	0	0	0	0	3	1	0	0	0	0	0	3	0	0	6
6	0.1.19.5.1.1.1	Lineage_IIa_ge	403	0	0	0	0	0	0	0	0	0	0	0	0	0	0	0	0	0	0	3	0	1	0	0	0	0	0	0	0	0	2	0	0	0	0	0	3	1	0	0	0	0	0	3	0	0	6
3	0.1.19.6	Lineage_IIb	70	0	0	0	0	0	0	0	0	0	0	0	0	0	0	0	0	0	0	0	0	0	0	0	0	0	0	0	0	0	0	0	0	0	1	0	0	0	0	0	0	0	0	1	0	0	0
4	0.1.19.6.1	Lineage_IIb_or	70	0	0	0	0	0	0	0	0	0	0	0	0	0	0	0	0	0	0	0	0	0	0	0	0	0	0	0	0	0	0	0	0	0	1	0	0	0	0	0	0	0	0	1	0	0	0
5	0.1.19.6.1.1	Lineage_IIb_fa	70	0	0	0	0	0	0	0	0	0	0	0	0	0	0	0	0	0	0	0	0	0	0	0	0	0	0	0	0	0	0	0	0	0	1	0	0	0	0	0	0	0	0	1	0	0	0
6	0.1.19.6.1.1.1	Lineage_IIb_ge	70	0	0	0	0	0	0	0	0	0	0	0	0	0	0	0	0	0	0	0	0	0	0	0	0	0	0	0	0	0	0	0	0	0	1	0	0	0	0	0	0	0	0	1	0	0	0
3	0.1.19.7	Lineage_IIc	10	0	0	0	0	0	0	0	0	0	0	0	0	0	0	0	0	0	0	0	0	0	0	0	0	0	0	0	0	0	0	0	0	0	0	0	0	0	0	0	0	0	0	0	0	0	0
4	0.1.19.7.1	Lineage_IIc_or	10	0	0	0	0	0	0	0	0	0	0	0	0	0	0	0	0	0	0	0	0	0	0	0	0	0	0	0	0	0	0	0	0	0	0	0	0	0	0	0	0	0	0	0	0	0	0
5	0.1.19.7.1.1	Lineage_IIc_fa	10	0	0	0	0	0	0	0	0	0	0	0	0	0	0	0	0	0	0	0	0	0	0	0	0	0	0	0	0	0	0	0	0	0	0	0	0	0	0	0	0	0	0	0	0	0	0
6	0.1.19.7.1.1.1	Lineage_IIc_ge	10	0	0	0	0	0	0	0	0	0	0	0	0	0	0	0	0	0	0	0	0	0	0	0	0	0	0	0	0	0	0	0	0	0	0	0	0	0	0	0	0	0	0	0	0	0	0
2	0.1.20	Entotheonellaeota	1100	0	0	0	0	0	0	0	1	0	0	0	0	0	0	1	0	0	0	1	0	0	1	1	0	0	1	0	4	2	1	0	2	4	2	5	1	0	2	0	3	2	0	16	5	0	2
3	0.1.20.1	Entotheonellia	1100	0	0	0	0	0	0	0	1	0	0	0	0	0	0	1	0	0	0	1	0	0	1	1	0	0	1	0	4	2	1	0	2	4	2	5	1	0	2	0	3	2	0	16	5	0	2
4	0.1.20.1.1	Entotheonellales	1100	0	0	0	0	0	0	0	1	0	0	0	0	0	0	1	0	0	0	1	0	0	1	1	0	0	1	0	4	2	1	0	2	4	2	5	1	0	2	0	3	2	0	16	5	0	2
5	0.1.20.1.1.1	Entotheonellaceae	1100	0	0	0	0	0	0	0	1	0	0	0	0	0	0	1	0	0	0	1	0	0	1	1	0	0	1	0	4	2	1	0	2	4	2	5	1	0	2	0	3	2	0	16	5	0	2
6	0.1.20.1.1.1.1	Candidatus_Entotheonella	60	0	0	0	0	0	0	0	0	0	0	0	0	0	0	0	0	0	0	0	0	0	0	0	0	0	0	0	0	0	0	0	0	0	0	0	0	0	0	0	0	0	0	0	0	0	0
6	0.1.20.1.1.1.2	Entotheonellaceae_ge	1003	0	0	0	0	0	0	0	1	0	0	0	0	0	0	1	0	0	0	1	0	0	1	1	0	0	1	0	4	2	1	0	2	4	2	5	1	0	2	0	3	2	0	16	5	0	2
6	0.1.20.1.1.1.3	Entotheonellaceae_unclassified	37	0	0	0	0	0	0	0	0	0	0	0	0	0	0	0	0	0	0	0	0	0	0	0	0	0	0	0	0	0	0	0	0	0	0	0	0	0	0	0	0	0	0	0	0	0	0
2	0.1.21	Fibrobacterota	8120	84	2	0	1	6	21	193	21	0	20	0	465	25	12	6	26	230	0	460	159	294	379	261	171	22	48	77	97	249	439	0	340	249	1136	47	241	2	2	0	1	7	0	4	7	0	3
3	0.1.21.1	Fibrobacteria	8113	84	2	0	1	6	21	193	21	0	20	0	465	25	12	6	25	230	0	460	159	294	378	261	171	22	48	77	97	249	438	0	340	248	1136	47	241	2	2	0	1	7	0	4	7	0	3
4	0.1.21.1.1	Fibrobacterales	8113	84	2	0	1	6	21	193	21	0	20	0	465	25	12	6	25	230	0	460	159	294	378	261	171	22	48	77	97	249	438	0	340	248	1136	47	241	2	2	0	1	7	0	4	7	0	3
5	0.1.21.1.1.1	Fibrobacteraceae	8107	84	2	0	1	6	21	193	21	0	20	0	464	25	12	6	25	230	0	460	159	294	378	261	171	22	48	77	97	249	438	0	340	248	1136	47	241	2	2	0	1	7	0	4	7	0	3
6	0.1.21.1.1.1.1	Fibrobacter	7549	78	2	0	0	6	19	173	19	0	17	0	367	23	12	5	23	225	0	419	155	277	374	254	157	17	42	72	85	242	428	0	327	239	1100	46	229	1	2	0	1	7	0	4	6	0	3
6	0.1.21.1.1.1.2	Fibrobacteraceae_ge	196	1	0	0	1	0	0	12	0	0	0	0	61	2	0	0	0	2	0	22	2	12	1	0	12	0	0	2	4	2	7	0	5	2	13	0	1	0	0	0	0	0	0	0	0	0	0
6	0.1.21.1.1.1.3	Fibrobacteraceae_unclassified	297	5	0	0	0	0	2	8	2	0	3	0	36	0	0	1	2	3	0	19	2	5	3	7	2	4	6	3	8	5	3	0	7	7	23	1	9	1	0	0	0	0	0	0	1	0	0
6	0.1.21.1.1.1.4	possible_genus_04	40	0	0	0	0	0	0	0	0	0	0	0	0	0	0	0	0	0	0	0	0	0	0	0	0	1	0	0	0	0	0	0	0	0	0	0	2	0	0	0	0	0	0	0	0	0	0
6	0.1.21.1.1.1.5	possible_genus_06	1	0	0	0	0	0	0	0	0	0	0	0	0	0	0	0	0	0	0	0	0	0	0	0	0	0	0	0	0	0	0	0	0	0	0	0	0	0	0	0	0	0	0	0	0	0	0
6	0.1.21.1.1.1.6	uncultured	24	0	0	0	0	0	0	0	0	0	0	0	0	0	0	0	0	0	0	0	0	0	0	0	0	0	0	0	0	0	0	0	1	0	0	0	0	0	0	0	0	0	0	0	0	0	0
5	0.1.21.1.1.2	Fibrobacterales_unclassified	6	0	0	0	0	0	0	0	0	0	0	0	1	0	0	0	0	0	0	0	0	0	0	0	0	0	0	0	0	0	0	0	0	0	0	0	0	0	0	0	0	0	0	0	0	0	0
6	0.1.21.1.1.2.1	Fibrobacterales_unclassified	6	0	0	0	0	0	0	0	0	0	0	0	1	0	0	0	0	0	0	0	0	0	0	0	0	0	0	0	0	0	0	0	0	0	0	0	0	0	0	0	0	0	0	0	0	0	0
3	0.1.21.2	Fibrobacterota_unclassified	7	0	0	0	0	0	0	0	0	0	0	0	0	0	0	0	1	0	0	0	0	0	1	0	0	0	0	0	0	0	1	0	0	1	0	0	0	0	0	0	0	0	0	0	0	0	0
4	0.1.21.2.1	Fibrobacterota_unclassified	7	0	0	0	0	0	0	0	0	0	0	0	0	0	0	0	1	0	0	0	0	0	1	0	0	0	0	0	0	0	1	0	0	1	0	0	0	0	0	0	0	0	0	0	0	0	0
5	0.1.21.2.1.1	Fibrobacterota_unclassified	7	0	0	0	0	0	0	0	0	0	0	0	0	0	0	0	1	0	0	0	0	0	1	0	0	0	0	0	0	0	1	0	0	1	0	0	0	0	0	0	0	0	0	0	0	0	0
6	0.1.21.2.1.1.1	Fibrobacterota_unclassified	7	0	0	0	0	0	0	0	0	0	0	0	0	0	0	0	1	0	0	0	0	0	1	0	0	0	0	0	0	0	1	0	0	1	0	0	0	0	0	0	0	0	0	0	0	0	0
2	0.1.22	Firmicutes	1259511	6478	2	17	47	12808	14225	3536	12221	1	5522	1	3877	5468	5784	12372	5506	22729	0	8461	6156	7853	12925	9792	10189	13229	8054	9762	26044	12432	28400	10	20845	9372	11420	6493	15823	408	490	0	431	385	0	625	162	120	573
3	0.1.22.1	Bacilli	45431	556	0	0	1	504	179	196	116	0	78	0	111	55	294	136	140	111	0	290	59	56	244	50	620	297	147	77	241	180	268	0	343	85	258	112	210	107	97	0	124	50	0	92	24	29	107
4	0.1.22.1.1	Acholeplasmatales	3961	478	0	0	0	0	70	157	30	0	1	0	64	14	171	5	6	17	0	147	21	41	155	6	427	72	72	6	13	93	131	0	78	6	187	17	83	0	0	0	0	2	0	3	0	1	1
5	0.1.22.1.1.1	Acholeplasmataceae	3961	478	0	0	0	0	70	157	30	0	1	0	64	14	171	5	6	17	0	147	21	41	155	6	427	72	72	6	13	93	131	0	78	6	187	17	83	0	0	0	0	2	0	3	0	1	1
6	0.1.22.1.1.1.1	Acholeplasma	1	0	0	0	0	0	0	0	0	0	0	0	0	0	0	0	0	0	0	0	0	0	0	0	0	0	0	0	0	0	0	0	0	0	0	0	0	0	0	0	0	0	0	0	0	0	0
6	0.1.22.1.1.1.2	Acholeplasmataceae_unclassified	443	42	0	0	0	0	9	12	11	0	0	0	1	0	11	0	0	4	0	25	3	2	13	0	43	7	11	1	1	8	11	0	6	0	33	1	1	0	0	0	0	0	0	2	0	1	0
6	0.1.22.1.1.1.3	Anaeroplasma	3340	431	0	0	0	0	59	142	18	0	0	0	61	14	160	5	6	13	0	121	18	39	138	6	358	56	59	5	11	84	118	0	69	6	152	16	82	0	0	0	0	2	0	1	0	0	1
6	0.1.22.1.1.1.4	DMI	6	0	0	0	0	0	0	0	0	0	0	0	0	0	0	0	0	0	0	0	0	0	0	0	0	0	1	0	0	0	0	0	0	0	0	0	0	0	0	0	0	0	0	0	0	0	0
6	0.1.22.1.1.1.5	EMP-G18	141	3	0	0	0	0	2	1	1	0	0	0	1	0	0	0	0	0	0	1	0	0	2	0	23	7	1	0	1	1	2	0	3	0	2	0	0	0	0	0	0	0	0	0	0	0	0
6	0.1.22.1.1.1.6	NED5E9	1	0	0	0	0	0	0	0	0	0	0	0	0	0	0	0	0	0	0	0	0	0	1	0	0	0	0	0	0	0	0	0	0	0	0	0	0	0	0	0	0	0	0	0	0	0	0
6	0.1.22.1.1.1.7	T2WK15B57	29	2	0	0	0	0	0	2	0	0	1	0	1	0	0	0	0	0	0	0	0	0	1	0	3	2	0	0	0	0	0	0	0	0	0	0	0	0	0	0	0	0	0	0	0	0	0
4	0.1.22.1.2	Alicyclobacillales	115	0	0	0	0	0	0	0	0	0	0	0	0	0	0	0	0	0	0	3	0	0	0	0	0	0	0	0	0	0	0	0	0	0	0	0	0	0	3	0	3	0	0	0	0	0	4
5	0.1.22.1.2.1	Alicyclobacillaceae	115	0	0	0	0	0	0	0	0	0	0	0	0	0	0	0	0	0	0	3	0	0	0	0	0	0	0	0	0	0	0	0	0	0	0	0	0	0	3	0	3	0	0	0	0	0	4
6	0.1.22.1.2.1.1	Alicyclobacillaceae_unclassified	1	0	0	0	0	0	0	0	0	0	0	0	0	0	0	0	0	0	0	0	0	0	0	0	0	0	0	0	0	0	0	0	0	0	0	0	0	0	1	0	0	0	0	0	0	0	0
6	0.1.22.1.2.1.2	Tumebacillus	114	0	0	0	0	0	0	0	0	0	0	0	0	0	0	0	0	0	0	3	0	0	0	0	0	0	0	0	0	0	0	0	0	0	0	0	0	0	2	0	3	0	0	0	0	0	4
4	0.1.22.1.3	Bacillales	22477	0	0	0	0	2	7	0	6	0	2	0	3	0	1	8	5	23	0	35	4	2	7	4	14	6	6	10	31	12	25	0	47	8	4	38	16	84	74	0	108	30	0	71	16	11	70
5	0.1.22.1.3.1	Bacillaceae	11101	0	0	0	0	2	3	0	3	0	0	0	2	0	1	6	3	14	0	27	3	0	2	1	10	2	2	9	16	8	12	0	33	7	3	35	7	35	40	0	57	20	0	36	6	1	25
6	0.1.22.1.3.1.1	Amphibacillus	8	0	0	0	0	0	0	0	0	0	0	0	0	0	0	0	0	0	0	0	0	0	0	0	0	0	0	0	0	0	0	0	0	0	0	0	0	0	0	0	0	0	0	0	0	0	0
6	0.1.22.1.3.1.2	Anaerobacillus	1	0	0	0	0	0	0	0	0	0	0	0	0	0	0	0	0	0	0	0	0	0	0	0	0	0	0	0	0	0	0	0	0	0	0	0	0	0	0	0	0	0	0	0	0	0	0
6	0.1.22.1.3.1.3	Anoxybacillus	16	0	0	0	0	0	0	0	0	0	0	0	0	0	0	0	0	0	0	0	0	0	0	0	0	0	0	0	0	0	1	0	0	0	0	0	0	0	0	0	0	0	0	0	0	0	0
6	0.1.22.1.3.1.4	Aquibacillus	3	0	0	0	0	0	0	0	0	0	0	0	0	0	0	0	0	0	0	0	0	0	0	0	0	0	0	0	0	0	0	0	0	0	0	0	0	0	0	0	0	0	0	0	0	0	0
6	0.1.22.1.3.1.5	Aureibacillus	1	0	0	0	0	0	0	0	0	0	0	0	0	0	0	0	0	0	0	0	0	0	0	0	0	0	0	0	0	0	0	0	0	0	0	0	0	0	0	0	0	0	0	0	0	0	0
6	0.1.22.1.3.1.6	Bacillaceae_ge	1	0	0	0	0	0	0	0	0	0	0	0	0	0	0	0	0	0	0	0	0	0	0	0	0	0	0	0	0	0	0	0	0	0	0	0	0	0	0	0	1	0	0	0	0	0	0
6	0.1.22.1.3.1.7	Bacillaceae_unclassified	5769	0	0	0	0	0	0	0	2	0	0	0	2	0	1	3	2	9	0	8	1	0	2	1	4	1	0	6	8	1	0	0	15	5	1	15	5	16	32	0	45	20	0	30	4	1	18
6	0.1.22.1.3.1.8	Bacillus	4835	0	0	0	0	2	3	0	1	0	0	0	0	0	0	3	1	5	0	12	2	0	0	0	6	1	1	3	8	7	11	0	18	2	2	20	2	2	5	0	10	0	0	6	1	0	7
6	0.1.22.1.3.1.9	Falsibacillus	5	0	0	0	0	0	0	0	0	0	0	0	0	0	0	0	0	0	0	0	0	0	0	0	0	0	0	0	0	0	0	0	0	0	0	0	0	0	0	0	0	0	0	0	0	0	0
6	0.1.22.1.3.1.10	Fictibacillus	154	0	0	0	0	0	0	0	0	0	0	0	0	0	0	0	0	0	0	4	0	0	0	0	0	0	0	0	0	0	0	0	0	0	0	0	0	0	2	0	1	0	0	0	0	0	0
6	0.1.22.1.3.1.11	Gracilibacillus	1	0	0	0	0	0	0	0	0	0	0	0	0	0	0	0	0	0	0	0	0	0	0	0	0	0	0	0	0	0	0	0	0	0	0	0	0	0	0	0	0	0	0	0	0	0	0
6	0.1.22.1.3.1.12	Oceanobacillus	34	0	0	0	0	0	0	0	0	0	0	0	0	0	0	0	0	0	0	0	0	0	0	0	0	0	0	0	0	0	0	0	0	0	0	0	0	3	0	0	0	0	0	0	0	0	0
6	0.1.22.1.3.1.13	Ornithinibacillus	146	0	0	0	0	0	0	0	0	0	0	0	0	0	0	0	0	0	0	0	0	0	0	0	0	0	0	0	0	0	0	0	0	0	0	0	0	14	1	0	0	0	0	0	0	0	0
6	0.1.22.1.3.1.14	Paucisalibacillus	37	0	0	0	0	0	0	0	0	0	0	0	0	0	0	0	0	0	0	1	0	0	0	0	0	0	0	0	0	0	0	0	0	0	0	0	0	0	0	0	0	0	0	0	0	0	0
6	0.1.22.1.3.1.15	Pelagirhabdus	1	0	0	0	0	0	0	0	0	0	0	0	0	0	0	0	0	0	0	0	0	0	0	0	0	0	0	0	0	0	0	0	0	0	0	0	0	0	0	0	0	0	0	0	0	0	0
6	0.1.22.1.3.1.16	Pontibacillus	44	0	0	0	0	0	0	0	0	0	0	0	0	0	0	0	0	0	0	2	0	0	0	0	0	0	1	0	0	0	0	0	0	0	0	0	0	0	0	0	0	0	0	0	0	0	0
6	0.1.22.1.3.1.17	Salirhabdus	27	0	0	0	0	0	0	0	0	0	0	0	0	0	0	0	0	0	0	0	0	0	0	0	0	0	0	0	0	0	0	0	0	0	0	0	0	0	0	0	0	0	0	0	1	0	0
6	0.1.22.1.3.1.18	Sinibacillus	11	0	0	0	0	0	0	0	0	0	0	0	0	0	0	0	0	0	0	0	0	0	0	0	0	0	0	0	0	0	0	0	0	0	0	0	0	0	0	0	0	0	0	0	0	0	0
6	0.1.22.1.3.1.19	Tepidibacillus	1	0	0	0	0	0	0	0	0	0	0	0	0	0	0	0	0	0	0	0	0	0	0	0	0	0	0	0	0	0	0	0	0	0	0	0	0	0	0	0	0	0	0	0	0	0	0
6	0.1.22.1.3.1.20	Terribacillus	3	0	0	0	0	0	0	0	0	0	0	0	0	0	0	0	0	0	0	0	0	0	0	0	0	0	0	0	0	0	0	0	0	0	0	0	0	0	0	0	0	0	0	0	0	0	0
6	0.1.22.1.3.1.21	Virgibacillus	2	0	0	0	0	0	0	0	0	0	0	0	0	0	0	0	0	0	0	0	0	0	0	0	0	0	0	0	0	0	0	0	0	0	0	0	0	0	0	0	0	0	0	0	0	0	0
6	0.1.22.1.3.1.22	uncultured	1	0	0	0	0	0	0	0	0	0	0	0	0	0	0	0	0	0	0	0	0	0	0	0	0	0	0	0	0	0	0	0	0	0	0	0	0	0	0	0	0	0	0	0	0	0	0
5	0.1.22.1.3.2	Bacillales_unclassified	10462	0	0	0	0	0	4	0	2	0	0	0	1	0	0	2	2	7	0	7	1	2	3	3	0	3	4	1	14	4	11	0	13	1	1	3	5	48	34	0	51	9	0	34	10	10	41
6	0.1.22.1.3.2.1	Bacillales_unclassified	10462	0	0	0	0	0	4	0	2	0	0	0	1	0	0	2	2	7	0	7	1	2	3	3	0	3	4	1	14	4	11	0	13	1	1	3	5	48	34	0	51	9	0	34	10	10	41
5	0.1.22.1.3.3	Marinococcaceae	1	0	0	0	0	0	0	0	0	0	0	0	0	0	0	0	0	0	0	0	0	0	0	0	0	0	0	0	0	0	0	0	0	0	0	0	0	0	0	0	0	0	0	0	0	0	0
6	0.1.22.1.3.3.1	Marinococcus	1	0	0	0	0	0	0	0	0	0	0	0	0	0	0	0	0	0	0	0	0	0	0	0	0	0	0	0	0	0	0	0	0	0	0	0	0	0	0	0	0	0	0	0	0	0	0
5	0.1.22.1.3.4	Planococcaceae	888	0	0	0	0	0	0	0	1	0	2	0	0	0	0	0	0	2	0	1	0	0	2	0	4	1	0	0	1	0	2	0	1	0	0	0	4	1	0	0	0	1	0	1	0	0	4
6	0.1.22.1.3.4.1	Bhargavaea	4	0	0	0	0	0	0	0	0	0	0	0	0	0	0	0	0	0	0	0	0	0	0	0	0	0	0	0	0	0	0	0	0	0	0	0	0	0	0	0	0	0	0	0	0	0	0
6	0.1.22.1.3.4.2	Caryophanon	6	0	0	0	0	0	0	0	0	0	0	0	0	0	0	0	0	0	0	0	0	0	0	0	0	0	0	0	0	0	0	0	0	0	0	0	0	0	0	0	0	0	0	0	0	0	0
6	0.1.22.1.3.4.3	Chryseomicrobium	40	0	0	0	0	0	0	0	0	0	0	0	0	0	0	0	0	0	0	0	0	0	0	0	0	0	0	0	0	0	0	0	0	0	0	0	0	0	0	0	0	0	0	0	0	0	0
6	0.1.22.1.3.4.4	Chungangia	94	0	0	0	0	0	0	0	0	0	0	0	0	0	0	0	0	0	0	0	0	0	0	0	0	0	0	0	1	0	2	0	0	0	0	0	0	0	0	0	0	0	0	0	0	0	0
6	0.1.22.1.3.4.5	Domibacillus	9	0	0	0	0	0	0	0	0	0	0	0	0	0	0	0	0	0	0	0	0	0	0	0	0	0	0	0	0	0	0	0	0	0	0	0	0	0	0	0	0	0	0	0	0	0	0
6	0.1.22.1.3.4.6	Filibacter	2	0	0	0	0	0	0	0	0	0	0	0	0	0	0	0	0	0	0	0	0	0	0	0	0	0	0	0	0	0	0	0	0	0	0	0	0	0	0	0	0	0	0	0	0	0	0
6	0.1.22.1.3.4.7	Jeotgalibacillus	1	0	0	0	0	0	0	0	0	0	0	0	0	0	0	0	0	0	0	0	0	0	0	0	0	0	0	0	0	0	0	0	0	0	0	0	0	0	0	0	0	0	0	0	0	0	0
6	0.1.22.1.3.4.8	Kurthia	3	0	0	0	0	0	0	0	0	0	0	0	0	0	0	0	0	0	0	0	0	0	0	0	0	0	0	0	0	0	0	0	0	0	0	0	0	0	0	0	0	1	0	0	0	0	1
6	0.1.22.1.3.4.9	Lysinibacillus	26	0	0	0	0	0	0	0	0	0	0	0	0	0	0	0	0	0	0	0	0	0	0	0	0	0	0	0	0	0	0	0	0	0	0	0	0	0	0	0	0	0	0	0	0	0	0
6	0.1.22.1.3.4.10	Paenisporosarcina	123	0	0	0	0	0	0	0	1	0	0	0	0	0	0	0	0	1	0	0	0	0	1	0	0	0	0	0	0	0	0	0	0	0	0	0	0	0	0	0	0	0	0	0	0	0	0
6	0.1.22.1.3.4.11	Planococcaceae_unclassified	210	0	0	0	0	0	0	0	0	0	0	0	0	0	0	0	0	1	0	1	0	0	1	0	0	0	0	0	0	0	0	0	0	0	0	0	0	1	0	0	0	0	0	1	0	0	1
6	0.1.22.1.3.4.12	Planococcus	3	0	0	0	0	0	0	0	0	0	0	0	0	0	0	0	0	0	0	0	0	0	0	0	0	0	0	0	0	0	0	0	0	0	0	0	0	0	0	0	0	0	0	0	0	0	0
6	0.1.22.1.3.4.13	Planomicrobium	4	0	0	0	0	0	0	0	0	0	0	0	0	0	0	0	0	0	0	0	0	0	0	0	0	0	0	0	0	0	0	0	0	0	0	0	0	0	0	0	0	0	0	0	0	0	1
6	0.1.22.1.3.4.14	Psychrobacillus	5	0	0	0	0	0	0	0	0	0	0	0	0	0	0	0	0	0	0	0	0	0	0	0	0	0	0	0	0	0	0	0	0	0	0	0	0	0	0	0	0	0	0	0	0	0	0
6	0.1.22.1.3.4.15	Rummeliibacillus	2	0	0	0	0	0	0	0	0	0	2	0	0	0	0	0	0	0	0	0	0	0	0	0	0	0	0	0	0	0	0	0	0	0	0	0	0	0	0	0	0	0	0	0	0	0	0
6	0.1.22.1.3.4.16	Savagea	7	0	0	0	0	0	0	0	0	0	0	0	0	0	0	0	0	0	0	0	0	0	0	0	0	0	0	0	0	0	0	0	0	0	0	0	0	0	0	0	0	0	0	0	0	0	0
6	0.1.22.1.3.4.17	Solibacillus	8	0	0	0	0	0	0	0	0	0	0	0	0	0	0	0	0	0	0	0	0	0	0	0	0	0	0	0	0	0	0	0	0	0	0	0	1	0	0	0	0	0	0	0	0	0	0
6	0.1.22.1.3.4.18	Sporosarcina	3	0	0	0	0	0	0	0	0	0	0	0	0	0	0	0	0	0	0	0	0	0	0	0	0	0	0	0	0	0	0	0	0	0	0	0	0	0	0	0	0	0	0	0	0	0	0
6	0.1.22.1.3.4.19	Viridibacillus	2	0	0	0	0	0	0	0	0	0	0	0	0	0	0	0	0	0	0	0	0	0	0	0	0	0	0	0	0	0	0	0	0	0	0	0	0	0	0	0	0	0	0	0	0	0	0
6	0.1.22.1.3.4.20	uncultured	336	0	0	0	0	0	0	0	0	0	0	0	0	0	0	0	0	0	0	0	0	0	0	0	4	1	0	0	0	0	0	0	1	0	0	0	3	0	0	0	0	0	0	0	0	0	1
5	0.1.22.1.3.5	Salisediminibacteriaceae	1	0	0	0	0	0	0	0	0	0	0	0	0	0	0	0	0	0	0	0	0	0	0	0	0	0	0	0	0	0	0	0	0	0	0	0	0	0	0	0	0	0	0	0	0	0	0
6	0.1.22.1.3.5.1	Salipaludibacillus	1	0	0	0	0	0	0	0	0	0	0	0	0	0	0	0	0	0	0	0	0	0	0	0	0	0	0	0	0	0	0	0	0	0	0	0	0	0	0	0	0	0	0	0	0	0	0
5	0.1.22.1.3.6	Sporolactobacillaceae	24	0	0	0	0	0	0	0	0	0	0	0	0	0	0	0	0	0	0	0	0	0	0	0	0	0	0	0	0	0	0	0	0	0	0	0	0	0	0	0	0	0	0	0	0	0	0
6	0.1.22.1.3.6.1	Sporolactobacillaceae_unclassified	21	0	0	0	0	0	0	0	0	0	0	0	0	0	0	0	0	0	0	0	0	0	0	0	0	0	0	0	0	0	0	0	0	0	0	0	0	0	0	0	0	0	0	0	0	0	0
6	0.1.22.1.3.6.2	Sporolactobacillus	1	0	0	0	0	0	0	0	0	0	0	0	0	0	0	0	0	0	0	0	0	0	0	0	0	0	0	0	0	0	0	0	0	0	0	0	0	0	0	0	0	0	0	0	0	0	0
6	0.1.22.1.3.6.3	uncultured	2	0	0	0	0	0	0	0	0	0	0	0	0	0	0	0	0	0	0	0	0	0	0	0	0	0	0	0	0	0	0	0	0	0	0	0	0	0	0	0	0	0	0	0	0	0	0
4	0.1.22.1.4	Bacilli_unclassified	4395	9	0	0	0	7	10	4	5	0	5	0	3	2	3	8	11	7	0	4	3	0	8	2	12	9	3	5	15	8	11	0	22	5	7	3	4	9	10	0	10	1	0	5	5	3	15
5	0.1.22.1.4.1	Bacilli_unclassified	4395	9	0	0	0	7	10	4	5	0	5	0	3	2	3	8	11	7	0	4	3	0	8	2	12	9	3	5	15	8	11	0	22	5	7	3	4	9	10	0	10	1	0	5	5	3	15
6	0.1.22.1.4.1.1	Bacilli_unclassified	4395	9	0	0	0	7	10	4	5	0	5	0	3	2	3	8	11	7	0	4	3	0	8	2	12	9	3	5	15	8	11	0	22	5	7	3	4	9	10	0	10	1	0	5	5	3	15
4	0.1.22.1.5	Brevibacillales	32	0	0	0	0	0	0	0	0	0	0	0	0	0	0	0	0	0	0	0	0	0	0	0	0	0	0	0	0	0	0	0	0	0	0	0	0	0	0	0	0	0	0	0	0	0	0
5	0.1.22.1.5.1	Brevibacillaceae	32	0	0	0	0	0	0	0	0	0	0	0	0	0	0	0	0	0	0	0	0	0	0	0	0	0	0	0	0	0	0	0	0	0	0	0	0	0	0	0	0	0	0	0	0	0	0
6	0.1.22.1.5.1.1	Brevibacillus	32	0	0	0	0	0	0	0	0	0	0	0	0	0	0	0	0	0	0	0	0	0	0	0	0	0	0	0	0	0	0	0	0	0	0	0	0	0	0	0	0	0	0	0	0	0	0
4	0.1.22.1.6	Erysipelotrichales	3533	7	0	0	0	14	20	19	13	0	16	0	14	10	22	35	9	37	0	55	5	3	11	6	61	40	10	40	45	38	46	0	97	13	20	17	49	1	4	0	1	6	0	3	0	0	11
5	0.1.22.1.6.1	Erysipelatoclostridiaceae	753	2	0	0	0	8	10	3	0	0	4	0	13	2	6	10	5	0	0	39	1	0	4	0	9	5	4	29	7	3	2	0	62	1	15	3	44	0	0	0	1	0	0	1	0	0	5
6	0.1.22.1.6.1.1	Asteroleplasma	7	1	0	0	0	0	0	0	0	0	0	0	0	0	0	0	0	0	0	0	0	0	0	0	0	0	0	0	0	0	0	0	0	0	0	0	3	0	0	0	0	0	0	0	0	0	0
6	0.1.22.1.6.1.2	Candidatus_Stoquefichus	38	0	0	0	0	0	0	0	0	0	0	0	0	0	0	0	0	0	0	0	0	0	0	0	0	0	0	0	0	0	0	0	0	0	0	1	0	0	0	0	0	0	0	0	0	0	0
6	0.1.22.1.6.1.3	Catenibacterium	4	0	0	0	0	0	0	0	0	0	0	0	0	0	0	0	0	0	0	2	0	0	0	0	0	0	0	0	0	0	0	0	0	0	0	0	0	0	0	0	0	0	0	0	0	0	0
6	0.1.22.1.6.1.4	Eggerthia	1	0	0	0	0	0	0	0	0	0	0	0	0	0	0	0	0	0	0	0	0	0	0	0	0	0	0	0	0	0	0	0	0	0	0	0	0	0	0	0	0	0	0	0	0	0	0
6	0.1.22.1.6.1.5	Erysipelatoclostridiaceae_ge	7	0	0	0	0	0	0	0	0	0	0	0	0	0	0	0	0	0	0	0	0	0	0	0	0	0	0	0	0	0	0	0	0	0	0	0	0	0	0	0	0	0	0	0	0	0	0
6	0.1.22.1.6.1.6	Erysipelatoclostridiaceae_unclassified	53	0	0	0	0	0	0	0	0	0	0	0	0	0	0	0	0	0	0	0	0	0	0	0	0	0	0	0	2	0	0	0	0	1	0	0	0	0	0	0	0	0	0	0	0	0	0
6	0.1.22.1.6.1.7	Erysipelatoclostridium	50	0	0	0	0	0	0	0	0	0	0	0	0	0	0	0	0	0	0	0	0	0	0	0	0	0	0	0	0	0	0	0	0	0	0	0	0	0	0	0	0	0	0	0	0	0	0
6	0.1.22.1.6.1.8	Erysipelotrichaceae_UCG-002	9	0	0	0	0	0	0	0	0	0	0	0	0	0	0	0	0	0	0	2	0	0	0	0	0	0	0	0	1	0	0	0	0	0	0	0	0	0	0	0	0	0	0	0	0	0	0
6	0.1.22.1.6.1.9	Erysipelotrichaceae_UCG-003	3	0	0	0	0	0	0	0	0	0	0	0	0	0	0	0	0	0	0	0	0	0	0	0	0	0	0	0	0	0	0	0	0	0	0	0	0	0	0	0	0	0	0	0	0	0	0
6	0.1.22.1.6.1.10	Sharpea	80	0	0	0	0	0	0	0	0	0	0	0	0	0	0	0	1	0	0	0	0	0	2	0	0	0	0	2	0	0	0	0	55	0	0	0	0	0	0	0	0	0	0	0	0	0	0
6	0.1.22.1.6.1.11	UCG-004	501	1	0	0	0	8	10	3	0	0	4	0	13	2	6	10	4	0	0	35	1	0	2	0	9	5	4	27	4	3	2	0	7	0	15	2	41	0	0	0	1	0	0	1	0	0	5
5	0.1.22.1.6.2	Erysipelotrichaceae	2361	5	0	0	0	5	9	14	12	0	11	0	1	7	16	25	4	32	0	15	4	3	6	6	47	32	5	9	37	32	41	0	34	12	4	14	4	1	4	0	0	6	0	2	0	0	3
6	0.1.22.1.6.2.1	Breznakia	76	0	0	0	0	0	0	0	0	0	0	0	0	0	0	0	0	0	0	0	0	0	0	0	0	0	0	0	0	0	2	0	0	0	0	0	0	0	0	0	0	0	0	0	0	0	0
6	0.1.22.1.6.2.2	Bulleidia	16	0	0	0	0	0	0	1	1	0	0	0	0	0	1	0	0	1	0	0	0	0	0	0	0	0	0	1	0	0	1	0	0	0	0	0	0	0	0	0	0	0	0	0	0	0	0
6	0.1.22.1.6.2.3	Catenisphaera	10	0	0	0	0	0	0	0	0	0	0	0	0	0	0	0	0	0	0	0	0	0	0	0	0	1	0	0	0	3	4	0	1	0	0	0	0	0	0	0	0	0	0	0	0	0	0
6	0.1.22.1.6.2.4	Dielma	202	0	0	0	0	0	0	0	0	0	0	0	0	0	0	0	0	0	0	0	0	0	0	0	0	0	0	0	0	1	0	0	0	1	0	0	0	0	3	0	0	0	0	0	0	0	0
6	0.1.22.1.6.2.5	Erysipelotrichaceae_UCG-006	45	0	0	0	0	0	0	0	1	0	0	0	0	0	0	0	0	0	0	0	0	0	0	0	0	0	0	0	2	0	0	0	0	0	0	0	0	0	0	0	0	0	0	0	0	0	0
6	0.1.22.1.6.2.6	Erysipelotrichaceae_UCG-009	88	0	0	0	0	0	0	0	0	0	1	0	0	1	0	0	0	0	0	2	0	0	1	0	9	0	0	2	2	0	5	0	4	1	2	0	1	0	1	0	0	0	0	0	0	0	2
6	0.1.22.1.6.2.7	Erysipelotrichaceae_ge	279	0	0	0	0	0	0	0	4	0	2	0	0	3	2	3	1	1	0	4	2	2	2	0	0	3	0	0	6	5	0	0	5	4	0	1	0	0	0	0	0	0	0	0	0	0	1
6	0.1.22.1.6.2.8	Erysipelotrichaceae_unclassified	919	1	0	0	0	2	2	3	2	0	4	0	1	2	2	1	0	9	0	5	1	1	3	1	3	2	1	2	7	2	6	0	7	3	1	3	1	0	0	0	0	1	0	2	0	0	0
6	0.1.22.1.6.2.9	Faecalicoccus	57	0	0	0	0	0	0	0	0	0	0	0	0	0	0	0	0	0	0	0	0	0	0	0	0	0	0	0	0	0	0	0	0	0	0	0	0	0	0	0	0	0	0	0	0	0	0
6	0.1.22.1.6.2.10	Faecalitalea	19	0	0	0	0	0	0	0	0	0	0	0	0	0	0	0	1	0	0	0	0	0	0	0	0	0	0	0	0	0	0	0	0	0	0	1	0	0	0	0	0	0	0	0	0	0	0
6	0.1.22.1.6.2.11	Holdemania	53	0	0	0	0	0	0	0	0	0	0	0	0	0	0	0	0	0	0	0	0	0	0	0	0	0	0	0	0	0	0	0	1	0	0	0	0	0	0	0	0	0	0	0	0	0	0
6	0.1.22.1.6.2.12	Solobacterium	151	2	0	0	0	0	1	0	0	0	0	0	0	0	0	0	2	3	0	1	0	0	0	4	5	0	2	0	3	1	14	0	1	0	0	1	1	0	0	0	0	4	0	0	0	0	0
6	0.1.22.1.6.2.13	Turicibacter	9	0	0	0	0	0	0	0	0	0	0	0	0	0	0	0	0	0	0	0	0	0	0	0	0	0	0	0	0	0	0	0	0	0	0	0	0	0	0	0	0	0	0	0	0	0	0
6	0.1.22.1.6.2.14	uncultured	437	2	0	0	0	3	6	10	4	0	4	0	0	1	11	21	0	18	0	3	1	0	0	1	30	26	2	4	17	20	9	0	15	3	1	8	1	1	0	0	0	1	0	0	0	0	0
5	0.1.22.1.6.3	Erysipelotrichales_unclassified	403	0	0	0	0	1	1	2	1	0	1	0	0	1	0	0	0	5	0	1	0	0	1	0	5	3	1	2	1	3	3	0	1	0	1	0	1	0	0	0	0	0	0	0	0	0	3
6	0.1.22.1.6.3.1	Erysipelotrichales_unclassified	403	0	0	0	0	1	1	2	1	0	1	0	0	1	0	0	0	5	0	1	0	0	1	0	5	3	1	2	1	3	3	0	1	0	1	0	1	0	0	0	0	0	0	0	0	0	3
5	0.1.22.1.6.4	uncultured	16	0	0	0	0	0	0	0	0	0	0	0	0	0	0	0	0	0	0	0	0	0	0	0	0	0	0	0	0	0	0	0	0	0	0	0	0	0	0	0	0	0	0	0	0	0	0
6	0.1.22.1.6.4.1	uncultured_ge	16	0	0	0	0	0	0	0	0	0	0	0	0	0	0	0	0	0	0	0	0	0	0	0	0	0	0	0	0	0	0	0	0	0	0	0	0	0	0	0	0	0	0	0	0	0	0
4	0.1.22.1.7	Exiguobacterales	148	0	0	0	0	0	0	0	0	0	0	0	0	0	0	0	0	0	0	0	0	0	0	0	0	0	0	0	0	0	0	0	0	0	0	0	0	4	2	0	1	0	0	0	0	0	2
5	0.1.22.1.7.1	Exiguobacteraceae	148	0	0	0	0	0	0	0	0	0	0	0	0	0	0	0	0	0	0	0	0	0	0	0	0	0	0	0	0	0	0	0	0	0	0	0	0	4	2	0	1	0	0	0	0	0	2
6	0.1.22.1.7.1.1	Exiguobacterium	148	0	0	0	0	0	0	0	0	0	0	0	0	0	0	0	0	0	0	0	0	0	0	0	0	0	0	0	0	0	0	0	0	0	0	0	0	4	2	0	1	0	0	0	0	0	2
4	0.1.22.1.8	Izemoplasmatales	3541	6	0	0	0	0	0	1	1	0	0	0	1	1	2	0	1	1	0	1	3	2	14	5	1	1	1	0	16	2	2	0	3	0	19	1	23	0	0	0	0	0	0	0	0	0	1
5	0.1.22.1.8.1	Izemoplasmatales_fa	3524	6	0	0	0	0	0	1	1	0	0	0	1	1	2	0	1	1	0	1	3	2	14	5	1	1	1	0	16	2	2	0	3	0	18	1	23	0	0	0	0	0	0	0	0	0	1
6	0.1.22.1.8.1.1	Izemoplasmatales_ge	3524	6	0	0	0	0	0	1	1	0	0	0	1	1	2	0	1	1	0	1	3	2	14	5	1	1	1	0	16	2	2	0	3	0	18	1	23	0	0	0	0	0	0	0	0	0	1
5	0.1.22.1.8.2	Izemoplasmatales_unclassified	17	0	0	0	0	0	0	0	0	0	0	0	0	0	0	0	0	0	0	0	0	0	0	0	0	0	0	0	0	0	0	0	0	0	1	0	0	0	0	0	0	0	0	0	0	0	0
6	0.1.22.1.8.2.1	Izemoplasmatales_unclassified	17	0	0	0	0	0	0	0	0	0	0	0	0	0	0	0	0	0	0	0	0	0	0	0	0	0	0	0	0	0	0	0	0	0	1	0	0	0	0	0	0	0	0	0	0	0	0
4	0.1.22.1.9	Lactobacillales	1926	3	0	0	0	444	2	0	4	0	0	0	3	3	0	34	9	2	0	8	0	0	0	1	3	33	4	0	11	0	5	0	3	8	0	0	1	3	1	0	0	7	0	0	1	7	2
5	0.1.22.1.9.1	Aerococcaceae	466	0	0	0	0	0	0	0	0	0	0	0	0	0	0	0	0	0	0	0	0	0	0	0	0	0	0	0	0	0	0	0	0	0	0	0	0	0	0	0	0	1	0	0	0	5	2
6	0.1.22.1.9.1.1	Abiotrophia	9	0	0	0	0	0	0	0	0	0	0	0	0	0	0	0	0	0	0	0	0	0	0	0	0	0	0	0	0	0	0	0	0	0	0	0	0	0	0	0	0	0	0	0	0	0	0
6	0.1.22.1.9.1.2	Aerococcaceae_unclassified	300	0	0	0	0	0	0	0	0	0	0	0	0	0	0	0	0	0	0	0	0	0	0	0	0	0	0	0	0	0	0	0	0	0	0	0	0	0	0	0	0	0	0	0	0	0	0
6	0.1.22.1.9.1.3	Aerococcus	102	0	0	0	0	0	0	0	0	0	0	0	0	0	0	0	0	0	0	0	0	0	0	0	0	0	0	0	0	0	0	0	0	0	0	0	0	0	0	0	0	0	0	0	0	0	0
6	0.1.22.1.9.1.4	Aerosphaera	1	0	0	0	0	0	0	0	0	0	0	0	0	0	0	0	0	0	0	0	0	0	0	0	0	0	0	0	0	0	0	0	0	0	0	0	0	0	0	0	0	0	0	0	0	1	0
6	0.1.22.1.9.1.5	Facklamia	19	0	0	0	0	0	0	0	0	0	0	0	0	0	0	0	0	0	0	0	0	0	0	0	0	0	0	0	0	0	0	0	0	0	0	0	0	0	0	0	0	0	0	0	0	2	1
6	0.1.22.1.9.1.6	Ignavigranum	29	0	0	0	0	0	0	0	0	0	0	0	0	0	0	0	0	0	0	0	0	0	0	0	0	0	0	0	0	0	0	0	0	0	0	0	0	0	0	0	0	1	0	0	0	2	1
6	0.1.22.1.9.1.7	uncultured	6	0	0	0	0	0	0	0	0	0	0	0	0	0	0	0	0	0	0	0	0	0	0	0	0	0	0	0	0	0	0	0	0	0	0	0	0	0	0	0	0	0	0	0	0	0	0
5	0.1.22.1.9.2	Carnobacteriaceae	48	0	0	0	0	0	0	0	0	0	0	0	0	0	0	0	0	0	0	0	0	0	0	0	0	0	0	0	0	0	0	0	0	0	0	0	0	0	0	0	0	2	0	0	0	1	0
6	0.1.22.1.9.2.1	Alloiococcus	2	0	0	0	0	0	0	0	0	0	0	0	0	0	0	0	0	0	0	0	0	0	0	0	0	0	0	0	0	0	0	0	0	0	0	0	0	0	0	0	0	1	0	0	0	0	0
6	0.1.22.1.9.2.2	Atopostipes	19	0	0	0	0	0	0	0	0	0	0	0	0	0	0	0	0	0	0	0	0	0	0	0	0	0	0	0	0	0	0	0	0	0	0	0	0	0	0	0	0	1	0	0	0	1	0
6	0.1.22.1.9.2.3	Carnobacteriaceae_unclassified	9	0	0	0	0	0	0	0	0	0	0	0	0	0	0	0	0	0	0	0	0	0	0	0	0	0	0	0	0	0	0	0	0	0	0	0	0	0	0	0	0	0	0	0	0	0	0
6	0.1.22.1.9.2.4	Desemzia	2	0	0	0	0	0	0	0	0	0	0	0	0	0	0	0	0	0	0	0	0	0	0	0	0	0	0	0	0	0	0	0	0	0	0	0	0	0	0	0	0	0	0	0	0	0	0
6	0.1.22.1.9.2.5	Granulicatella	6	0	0	0	0	0	0	0	0	0	0	0	0	0	0	0	0	0	0	0	0	0	0	0	0	0	0	0	0	0	0	0	0	0	0	0	0	0	0	0	0	0	0	0	0	0	0
6	0.1.22.1.9.2.6	Jeotgalibaca	7	0	0	0	0	0	0	0	0	0	0	0	0	0	0	0	0	0	0	0	0	0	0	0	0	0	0	0	0	0	0	0	0	0	0	0	0	0	0	0	0	0	0	0	0	0	0
6	0.1.22.1.9.2.7	Lacticigenium	1	0	0	0	0	0	0	0	0	0	0	0	0	0	0	0	0	0	0	0	0	0	0	0	0	0	0	0	0	0	0	0	0	0	0	0	0	0	0	0	0	0	0	0	0	0	0
6	0.1.22.1.9.2.8	uncultured	2	0	0	0	0	0	0	0	0	0	0	0	0	0	0	0	0	0	0	0	0	0	0	0	0	0	0	0	0	0	0	0	0	0	0	0	0	0	0	0	0	0	0	0	0	0	0
5	0.1.22.1.9.3	Enterococcaceae	23	0	0	0	0	0	0	0	0	0	0	0	0	0	0	0	0	0	0	0	0	0	0	0	2	0	0	0	2	0	0	0	0	0	0	0	0	0	0	0	0	0	0	0	0	0	0
6	0.1.22.1.9.3.1	Enterococcus	23	0	0	0	0	0	0	0	0	0	0	0	0	0	0	0	0	0	0	0	0	0	0	0	2	0	0	0	2	0	0	0	0	0	0	0	0	0	0	0	0	0	0	0	0	0	0
5	0.1.22.1.9.4	Lactobacillaceae	66	0	0	0	0	0	0	0	0	0	0	0	3	0	0	0	0	0	0	1	0	0	0	0	0	25	0	0	6	0	0	0	1	0	0	0	0	3	1	0	0	0	0	0	0	0	0
6	0.1.22.1.9.4.1	Agrilactobacillus	1	0	0	0	0	0	0	0	0	0	0	0	0	0	0	0	0	0	0	0	0	0	0	0	0	1	0	0	0	0	0	0	0	0	0	0	0	0	0	0	0	0	0	0	0	0	0
6	0.1.22.1.9.4.2	Companilactobacillus	1	0	0	0	0	0	0	0	0	0	0	0	0	0	0	0	0	0	0	0	0	0	0	0	0	0	0	0	0	0	0	0	0	0	0	0	0	0	0	0	0	0	0	0	0	0	0
6	0.1.22.1.9.4.3	Lactiplantibacillus	1	0	0	0	0	0	0	0	0	0	0	0	0	0	0	0	0	0	0	0	0	0	0	0	0	0	0	0	0	0	0	0	0	0	0	0	0	0	0	0	0	0	0	0	0	0	0
6	0.1.22.1.9.4.4	Lactobacillaceae_unclassified	1	0	0	0	0	0	0	0	0	0	0	0	0	0	0	0	0	0	0	0	0	0	0	0	0	0	0	0	0	0	0	0	0	0	0	0	0	0	0	0	0	0	0	0	0	0	0
6	0.1.22.1.9.4.5	Lapidilactobacillus	1	0	0	0	0	0	0	0	0	0	0	0	0	0	0	0	0	0	0	0	0	0	0	0	0	0	0	0	0	0	0	0	0	0	0	0	0	0	0	0	0	0	0	0	0	0	0
6	0.1.22.1.9.4.6	Latilactobacillus	2	0	0	0	0	0	0	0	0	0	0	0	0	0	0	0	0	0	0	0	0	0	0	0	0	0	0	0	0	0	0	0	0	0	0	0	0	0	1	0	0	0	0	0	0	0	0
6	0.1.22.1.9.4.7	Leuconostoc	1	0	0	0	0	0	0	0	0	0	0	0	0	0	0	0	0	0	0	1	0	0	0	0	0	0	0	0	0	0	0	0	0	0	0	0	0	0	0	0	0	0	0	0	0	0	0
6	0.1.22.1.9.4.8	Ligilactobacillus	9	0	0	0	0	0	0	0	0	0	0	0	0	0	0	0	0	0	0	0	0	0	0	0	0	0	0	0	0	0	0	0	0	0	0	0	0	0	0	0	0	0	0	0	0	0	0
6	0.1.22.1.9.4.9	Limosilactobacillus	46	0	0	0	0	0	0	0	0	0	0	0	3	0	0	0	0	0	0	0	0	0	0	0	0	24	0	0	6	0	0	0	1	0	0	0	0	3	0	0	0	0	0	0	0	0	0
6	0.1.22.1.9.4.10	Pediococcus	3	0	0	0	0	0	0	0	0	0	0	0	0	0	0	0	0	0	0	0	0	0	0	0	0	0	0	0	0	0	0	0	0	0	0	0	0	0	0	0	0	0	0	0	0	0	0
5	0.1.22.1.9.5	Lactobacillales_unclassified	93	0	0	0	0	5	0	0	0	0	0	0	0	0	0	1	2	0	0	0	0	0	0	0	0	1	0	0	1	0	1	0	0	1	0	0	0	0	0	0	0	1	0	0	0	0	0
6	0.1.22.1.9.5.1	Lactobacillales_unclassified	93	0	0	0	0	5	0	0	0	0	0	0	0	0	0	1	2	0	0	0	0	0	0	0	0	1	0	0	1	0	1	0	0	1	0	0	0	0	0	0	0	1	0	0	0	0	0
5	0.1.22.1.9.6	Streptococcaceae	1230	3	0	0	0	439	2	0	4	0	0	0	0	3	0	33	7	2	0	7	0	0	0	1	1	7	4	0	2	0	4	0	2	7	0	0	1	0	0	0	0	3	0	0	1	1	0
6	0.1.22.1.9.6.1	Floricoccus	71	0	0	0	0	11	0	0	0	0	0	0	0	0	0	0	2	0	0	1	0	0	0	0	0	0	1	0	0	0	1	0	0	1	0	0	0	0	0	0	0	0	0	0	0	0	0
6	0.1.22.1.9.6.2	Lactococcus	3	0	0	0	0	0	0	0	0	0	0	0	0	0	0	0	0	0	0	0	0	0	0	0	0	0	0	0	0	0	0	0	0	0	0	0	0	0	0	0	0	0	0	0	0	0	0
6	0.1.22.1.9.6.3	Streptococcaceae_unclassified	89	0	0	0	0	20	0	0	0	0	0	0	0	0	0	2	0	0	0	0	0	0	0	0	0	0	0	0	0	0	0	0	0	0	0	0	0	0	0	0	0	1	0	0	0	0	0
6	0.1.22.1.9.6.4	Streptococcus	1067	3	0	0	0	408	2	0	4	0	0	0	0	3	0	31	5	2	0	6	0	0	0	1	1	7	3	0	2	0	3	0	2	6	0	0	1	0	0	0	0	2	0	0	1	1	0
4	0.1.22.1.10	Mycoplasmatales	6	0	0	0	0	0	0	0	0	0	0	0	0	0	0	0	0	0	0	0	0	0	0	0	0	0	0	0	0	0	0	0	0	0	0	0	0	0	0	0	0	0	0	0	0	0	0
5	0.1.22.1.10.1	Mycoplasmataceae	6	0	0	0	0	0	0	0	0	0	0	0	0	0	0	0	0	0	0	0	0	0	0	0	0	0	0	0	0	0	0	0	0	0	0	0	0	0	0	0	0	0	0	0	0	0	0
6	0.1.22.1.10.1.1	Mycoplasma	6	0	0	0	0	0	0	0	0	0	0	0	0	0	0	0	0	0	0	0	0	0	0	0	0	0	0	0	0	0	0	0	0	0	0	0	0	0	0	0	0	0	0	0	0	0	0
4	0.1.22.1.11	Paenibacillales	332	0	0	0	0	0	0	0	0	0	0	0	0	0	0	0	0	0	0	0	0	0	0	0	0	0	0	0	0	0	0	0	1	0	0	0	0	0	0	0	0	0	0	1	0	0	0
5	0.1.22.1.11.1	Paenibacillaceae	332	0	0	0	0	0	0	0	0	0	0	0	0	0	0	0	0	0	0	0	0	0	0	0	0	0	0	0	0	0	0	0	1	0	0	0	0	0	0	0	0	0	0	1	0	0	0
6	0.1.22.1.11.1.1	Ammoniibacillus	4	0	0	0	0	0	0	0	0	0	0	0	0	0	0	0	0	0	0	0	0	0	0	0	0	0	0	0	0	0	0	0	0	0	0	0	0	0	0	0	0	0	0	0	0	0	0
6	0.1.22.1.11.1.2	Ammoniphilus	6	0	0	0	0	0	0	0	0	0	0	0	0	0	0	0	0	0	0	0	0	0	0	0	0	0	0	0	0	0	0	0	0	0	0	0	0	0	0	0	0	0	0	0	0	0	0
6	0.1.22.1.11.1.3	Cohnella	9	0	0	0	0	0	0	0	0	0	0	0	0	0	0	0	0	0	0	0	0	0	0	0	0	0	0	0	0	0	0	0	0	0	0	0	0	0	0	0	0	0	0	0	0	0	0
6	0.1.22.1.11.1.4	Oxalophagus	10	0	0	0	0	0	0	0	0	0	0	0	0	0	0	0	0	0	0	0	0	0	0	0	0	0	0	0	0	0	0	0	0	0	0	0	0	0	0	0	0	0	0	0	0	0	0
6	0.1.22.1.11.1.5	Paenibacillaceae_ge	1	0	0	0	0	0	0	0	0	0	0	0	0	0	0	0	0	0	0	0	0	0	0	0	0	0	0	0	0	0	0	0	0	0	0	0	0	0	0	0	0	0	0	0	0	0	0
6	0.1.22.1.11.1.6	Paenibacillaceae_unclassified	42	0	0	0	0	0	0	0	0	0	0	0	0	0	0	0	0	0	0	0	0	0	0	0	0	0	0	0	0	0	0	0	0	0	0	0	0	0	0	0	0	0	0	0	0	0	0
6	0.1.22.1.11.1.7	Paenibacillus	258	0	0	0	0	0	0	0	0	0	0	0	0	0	0	0	0	0	0	0	0	0	0	0	0	0	0	0	0	0	0	0	0	0	0	0	0	0	0	0	0	0	0	1	0	0	0
6	0.1.22.1.11.1.8	Saccharibacillus	2	0	0	0	0	0	0	0	0	0	0	0	0	0	0	0	0	0	0	0	0	0	0	0	0	0	0	0	0	0	0	0	1	0	0	0	0	0	0	0	0	0	0	0	0	0	0
4	0.1.22.1.12	RF39	4002	53	0	0	1	36	70	15	57	0	54	0	23	25	95	46	99	20	0	34	23	8	49	26	100	136	51	16	109	24	41	0	86	45	21	34	27	5	2	0	1	0	0	6	0	1	0
5	0.1.22.1.12.1	RF39_fa	4002	53	0	0	1	36	70	15	57	0	54	0	23	25	95	46	99	20	0	34	23	8	49	26	100	136	51	16	109	24	41	0	86	45	21	34	27	5	2	0	1	0	0	6	0	1	0
6	0.1.22.1.12.1.1	RF39_ge	4002	53	0	0	1	36	70	15	57	0	54	0	23	25	95	46	99	20	0	34	23	8	49	26	100	136	51	16	109	24	41	0	86	45	21	34	27	5	2	0	1	0	0	6	0	1	0
4	0.1.22.1.13	Staphylococcales	914	0	0	0	0	1	0	0	0	0	0	0	0	0	0	0	0	4	0	2	0	0	0	0	1	0	0	0	1	3	7	0	6	0	0	2	6	1	1	0	0	4	0	3	2	6	1
5	0.1.22.1.13.1	Gemellaceae	4	0	0	0	0	0	0	0	0	0	0	0	0	0	0	0	0	0	0	0	0	0	0	0	0	0	0	0	0	0	0	0	0	0	0	0	0	0	0	0	0	0	0	0	0	0	0
6	0.1.22.1.13.1.1	Gemella	4	0	0	0	0	0	0	0	0	0	0	0	0	0	0	0	0	0	0	0	0	0	0	0	0	0	0	0	0	0	0	0	0	0	0	0	0	0	0	0	0	0	0	0	0	0	0
5	0.1.22.1.13.2	Staphylococcaceae	910	0	0	0	0	1	0	0	0	0	0	0	0	0	0	0	0	4	0	2	0	0	0	0	1	0	0	0	1	3	7	0	6	0	0	2	6	1	1	0	0	4	0	3	2	6	1
6	0.1.22.1.13.2.1	Aliicoccus	6	0	0	0	0	0	0	0	0	0	0	0	0	0	0	0	0	0	0	0	0	0	0	0	0	0	0	0	0	0	0	0	0	0	0	0	0	0	0	0	0	0	0	0	0	0	0
6	0.1.22.1.13.2.2	Jeotgalicoccus	47	0	0	0	0	0	0	0	0	0	0	0	0	0	0	0	0	0	0	0	0	0	0	0	0	0	0	0	0	0	5	0	0	0	0	1	0	0	0	0	0	1	0	0	0	2	1
6	0.1.22.1.13.2.3	Salinicoccus	13	0	0	0	0	0	0	0	0	0	0	0	0	0	0	0	0	0	0	0	0	0	0	0	0	0	0	0	0	0	0	0	0	0	0	0	2	0	0	0	0	0	0	0	0	0	0
6	0.1.22.1.13.2.4	Staphylococcaceae_ge	12	0	0	0	0	0	0	0	0	0	0	0	0	0	0	0	0	0	0	0	0	0	0	0	0	0	0	0	0	0	0	0	0	0	0	0	0	0	0	0	0	0	0	1	0	0	0
6	0.1.22.1.13.2.5	Staphylococcaceae_unclassified	29	0	0	0	0	0	0	0	0	0	0	0	0	0	0	0	0	0	0	0	0	0	0	0	0	0	0	0	0	0	0	0	0	0	0	0	0	0	0	0	0	0	0	0	0	1	0
6	0.1.22.1.13.2.6	Staphylococcus	803	0	0	0	0	1	0	0	0	0	0	0	0	0	0	0	0	4	0	2	0	0	0	0	1	0	0	0	1	3	2	0	6	0	0	1	4	1	1	0	0	3	0	2	2	3	0
4	0.1.22.1.14	Thermicanales	2	0	0	0	0	0	0	0	0	0	0	0	0	0	0	0	0	0	0	0	0	0	0	0	0	0	0	0	0	0	0	0	0	0	0	0	0	0	0	0	0	0	0	0	0	0	0
5	0.1.22.1.14.1	Thermicanaceae	2	0	0	0	0	0	0	0	0	0	0	0	0	0	0	0	0	0	0	0	0	0	0	0	0	0	0	0	0	0	0	0	0	0	0	0	0	0	0	0	0	0	0	0	0	0	0
6	0.1.22.1.14.1.1	Hydrogenibacillus	1	0	0	0	0	0	0	0	0	0	0	0	0	0	0	0	0	0	0	0	0	0	0	0	0	0	0	0	0	0	0	0	0	0	0	0	0	0	0	0	0	0	0	0	0	0	0
6	0.1.22.1.14.1.2	Thermicanus	1	0	0	0	0	0	0	0	0	0	0	0	0	0	0	0	0	0	0	0	0	0	0	0	0	0	0	0	0	0	0	0	0	0	0	0	0	0	0	0	0	0	0	0	0	0	0
4	0.1.22.1.15	Thermoactinomycetales	46	0	0	0	0	0	0	0	0	0	0	0	0	0	0	0	0	0	0	1	0	0	0	0	1	0	0	0	0	0	0	0	0	0	0	0	1	0	0	0	0	0	0	0	0	0	0
5	0.1.22.1.15.1	Thermoactinomycetaceae	46	0	0	0	0	0	0	0	0	0	0	0	0	0	0	0	0	0	0	1	0	0	0	0	1	0	0	0	0	0	0	0	0	0	0	0	1	0	0	0	0	0	0	0	0	0	0
6	0.1.22.1.15.1.1	Baia	2	0	0	0	0	0	0	0	0	0	0	0	0	0	0	0	0	0	0	0	0	0	0	0	0	0	0	0	0	0	0	0	0	0	0	0	0	0	0	0	0	0	0	0	0	0	0
6	0.1.22.1.15.1.2	Desmospora	1	0	0	0	0	0	0	0	0	0	0	0	0	0	0	0	0	0	0	0	0	0	0	0	0	0	0	0	0	0	0	0	0	0	0	0	0	0	0	0	0	0	0	0	0	0	0
6	0.1.22.1.15.1.3	Geothermomicrobium	3	0	0	0	0	0	0	0	0	0	0	0	0	0	0	0	0	0	0	0	0	0	0	0	0	0	0	0	0	0	0	0	0	0	0	0	0	0	0	0	0	0	0	0	0	0	0
6	0.1.22.1.15.1.4	Novibacillus	1	0	0	0	0	0	0	0	0	0	0	0	0	0	0	0	0	0	0	1	0	0	0	0	0	0	0	0	0	0	0	0	0	0	0	0	0	0	0	0	0	0	0	0	0	0	0
6	0.1.22.1.15.1.5	Pasteuria	3	0	0	0	0	0	0	0	0	0	0	0	0	0	0	0	0	0	0	0	0	0	0	0	0	0	0	0	0	0	0	0	0	0	0	0	0	0	0	0	0	0	0	0	0	0	0
6	0.1.22.1.15.1.6	Risungbinella	4	0	0	0	0	0	0	0	0	0	0	0	0	0	0	0	0	0	0	0	0	0	0	0	0	0	0	0	0	0	0	0	0	0	0	0	0	0	0	0	0	0	0	0	0	0	0
6	0.1.22.1.15.1.7	Seinonella	12	0	0	0	0	0	0	0	0	0	0	0	0	0	0	0	0	0	0	0	0	0	0	0	0	0	0	0	0	0	0	0	0	0	0	0	0	0	0	0	0	0	0	0	0	0	0
6	0.1.22.1.15.1.8	Shimazuella	2	0	0	0	0	0	0	0	0	0	0	0	0	0	0	0	0	0	0	0	0	0	0	0	1	0	0	0	0	0	0	0	0	0	0	0	0	0	0	0	0	0	0	0	0	0	0
6	0.1.22.1.15.1.9	Thermoactinomyces	1	0	0	0	0	0	0	0	0	0	0	0	0	0	0	0	0	0	0	0	0	0	0	0	0	0	0	0	0	0	0	0	0	0	0	0	0	0	0	0	0	0	0	0	0	0	0
6	0.1.22.1.15.1.10	Thermoactinomycetaceae_unclassified	11	0	0	0	0	0	0	0	0	0	0	0	0	0	0	0	0	0	0	0	0	0	0	0	0	0	0	0	0	0	0	0	0	0	0	0	1	0	0	0	0	0	0	0	0	0	0
6	0.1.22.1.15.1.11	uncultured	6	0	0	0	0	0	0	0	0	0	0	0	0	0	0	0	0	0	0	0	0	0	0	0	0	0	0	0	0	0	0	0	0	0	0	0	0	0	0	0	0	0	0	0	0	0	0
4	0.1.22.1.16	uncultured	1	0	0	0	0	0	0	0	0	0	0	0	0	0	0	0	0	0	0	0	0	0	0	0	0	0	0	0	0	0	0	0	0	0	0	0	0	0	0	0	0	0	0	0	0	0	0
5	0.1.22.1.16.1	uncultured_fa	1	0	0	0	0	0	0	0	0	0	0	0	0	0	0	0	0	0	0	0	0	0	0	0	0	0	0	0	0	0	0	0	0	0	0	0	0	0	0	0	0	0	0	0	0	0	0
6	0.1.22.1.16.1.1	uncultured_ge	1	0	0	0	0	0	0	0	0	0	0	0	0	0	0	0	0	0	0	0	0	0	0	0	0	0	0	0	0	0	0	0	0	0	0	0	0	0	0	0	0	0	0	0	0	0	0
3	0.1.22.2	Clostridia	1176475	5729	2	15	45	12139	13857	3204	11919	1	5334	1	3683	5309	5373	12104	5199	21648	0	7809	5963	7652	12554	9561	8330	12506	7668	9157	24466	11979	27652	10	20088	9009	10835	6301	15387	254	318	0	251	321	0	489	114	84	410
4	0.1.22.2.1	Caldicoprobacterales	42	0	0	0	0	0	0	0	0	0	0	0	0	0	0	0	0	0	0	0	0	0	0	0	0	0	0	0	0	0	0	0	0	0	0	0	0	0	0	0	0	0	0	0	0	0	0
5	0.1.22.2.1.1	Caldicoprobacteraceae	42	0	0	0	0	0	0	0	0	0	0	0	0	0	0	0	0	0	0	0	0	0	0	0	0	0	0	0	0	0	0	0	0	0	0	0	0	0	0	0	0	0	0	0	0	0	0
6	0.1.22.2.1.1.1	Caldicoprobacter	42	0	0	0	0	0	0	0	0	0	0	0	0	0	0	0	0	0	0	0	0	0	0	0	0	0	0	0	0	0	0	0	0	0	0	0	0	0	0	0	0	0	0	0	0	0	0
4	0.1.22.2.2	Christensenellales	74977	185	0	1	2	537	267	244	576	0	394	0	173	1870	440	741	342	1563	0	633	431	391	445	567	886	1627	518	392	8939	372	2945	3	2472	1216	1347	1050	1640	12	8	0	5	27	0	23	3	4	48
5	0.1.22.2.2.1	Christensenellaceae	74977	185	0	1	2	537	267	244	576	0	394	0	173	1870	440	741	342	1563	0	633	431	391	445	567	886	1627	518	392	8939	372	2945	3	2472	1216	1347	1050	1640	12	8	0	5	27	0	23	3	4	48
6	0.1.22.2.2.1.1	Christensenella	58	0	0	0	0	0	0	0	0	0	0	0	0	0	0	0	0	0	0	0	0	0	1	0	0	0	0	0	0	0	0	0	0	0	0	0	0	0	0	0	0	0	0	0	0	0	2
6	0.1.22.2.2.1.2	Christensenellaceae_R-7_group	63871	180	0	1	2	526	249	242	559	0	341	0	171	1816	242	731	317	1526	0	543	281	385	439	556	829	1562	498	391	2382	365	2883	3	2405	980	1317	1024	1634	7	5	0	4	27	0	22	2	4	41
6	0.1.22.2.2.1.3	Christensenellaceae_ge	67	0	0	0	0	0	1	1	0	0	1	0	0	0	1	0	0	8	0	1	3	0	0	0	0	1	0	0	5	0	2	0	3	1	1	4	0	0	0	0	0	0	0	0	0	0	0
6	0.1.22.2.2.1.4	Christensenellaceae_unclassified	10097	4	0	0	0	11	15	0	9	0	49	0	0	49	194	6	6	20	0	6	118	6	0	10	37	53	19	0	6532	3	17	0	19	209	17	17	1	3	3	0	0	0	0	1	1	0	5
6	0.1.22.2.2.1.5	uncultured	884	1	0	0	0	0	2	1	8	0	3	0	2	5	3	4	19	9	0	83	29	0	5	1	20	11	1	1	20	4	43	0	45	26	12	5	5	2	0	0	1	0	0	0	0	0	0
4	0.1.22.2.3	Clostridia_UCG-014	43963	227	0	0	1	564	1253	131	822	0	659	0	399	441	445	804	439	860	0	302	748	280	639	826	746	446	923	989	1329	1137	842	0	672	660	498	398	1330	7	5	0	0	24	0	9	5	5	15
5	0.1.22.2.3.1	Clostridia_UCG-014_fa	43963	227	0	0	1	564	1253	131	822	0	659	0	399	441	445	804	439	860	0	302	748	280	639	826	746	446	923	989	1329	1137	842	0	672	660	498	398	1330	7	5	0	0	24	0	9	5	5	15
6	0.1.22.2.3.1.1	Clostridia_UCG-014_ge	43963	227	0	0	1	564	1253	131	822	0	659	0	399	441	445	804	439	860	0	302	748	280	639	826	746	446	923	989	1329	1137	842	0	672	660	498	398	1330	7	5	0	0	24	0	9	5	5	15
4	0.1.22.2.4	Clostridia_or	47	0	0	0	0	0	0	0	0	0	0	0	0	0	0	0	0	1	0	0	0	0	0	0	0	0	0	0	0	0	0	0	0	0	0	0	1	0	0	0	0	0	0	0	0	0	0
5	0.1.22.2.4.1	Clostridia_fa	47	0	0	0	0	0	0	0	0	0	0	0	0	0	0	0	0	1	0	0	0	0	0	0	0	0	0	0	0	0	0	0	0	0	0	0	1	0	0	0	0	0	0	0	0	0	0
6	0.1.22.2.4.1.1	Clostridia_ge	47	0	0	0	0	0	0	0	0	0	0	0	0	0	0	0	0	1	0	0	0	0	0	0	0	0	0	0	0	0	0	0	0	0	0	0	1	0	0	0	0	0	0	0	0	0	0
4	0.1.22.2.5	Clostridia_unclassified	31129	86	0	1	2	548	152	44	106	0	138	0	85	120	320	138	167	253	0	136	104	98	171	184	148	293	167	191	750	353	286	0	209	193	96	96	211	18	35	0	30	13	0	50	13	8	26
5	0.1.22.2.5.1	Clostridia_unclassified	31129	86	0	1	2	548	152	44	106	0	138	0	85	120	320	138	167	253	0	136	104	98	171	184	148	293	167	191	750	353	286	0	209	193	96	96	211	18	35	0	30	13	0	50	13	8	26
6	0.1.22.2.5.1.1	Clostridia_unclassified	31129	86	0	1	2	548	152	44	106	0	138	0	85	120	320	138	167	253	0	136	104	98	171	184	148	293	167	191	750	353	286	0	209	193	96	96	211	18	35	0	30	13	0	50	13	8	26
4	0.1.22.2.6	Clostridia_vadinBB60_group	14863	2	0	0	0	11	21	5	6	0	9	0	16	8	6	1	11	108	0	5	20	23	34	25	33	82	17	30	207	8	100	0	69	7	39	23	103	0	9	0	3	0	0	2	0	2	3
5	0.1.22.2.6.1	Clostridia_vadinBB60_group_fa	14863	2	0	0	0	11	21	5	6	0	9	0	16	8	6	1	11	108	0	5	20	23	34	25	33	82	17	30	207	8	100	0	69	7	39	23	103	0	9	0	3	0	0	2	0	2	3
6	0.1.22.2.6.1.1	Clostridia_vadinBB60_group_ge	14863	2	0	0	0	11	21	5	6	0	9	0	16	8	6	1	11	108	0	5	20	23	34	25	33	82	17	30	207	8	100	0	69	7	39	23	103	0	9	0	3	0	0	2	0	2	3
4	0.1.22.2.7	Clostridiales	10222	8	0	0	1	5	2	5	6	0	4	0	0	4	2	3	0	23	0	606	110	40	106	127	68	12	45	23	136	45	446	0	623	732	6	45	24	7	6	0	4	0	0	9	0	0	5
5	0.1.22.2.7.1	Caloramatoraceae	9	0	0	0	0	0	0	0	0	0	1	0	0	0	0	0	0	0	0	0	0	0	0	0	0	0	0	0	0	0	0	0	0	0	0	0	0	0	0	0	0	0	0	0	0	0	0
6	0.1.22.2.7.1.1	Caloramatoraceae_unclassified	8	0	0	0	0	0	0	0	0	0	1	0	0	0	0	0	0	0	0	0	0	0	0	0	0	0	0	0	0	0	0	0	0	0	0	0	0	0	0	0	0	0	0	0	0	0	0
6	0.1.22.2.7.1.2	Clostridium	1	0	0	0	0	0	0	0	0	0	0	0	0	0	0	0	0	0	0	0	0	0	0	0	0	0	0	0	0	0	0	0	0	0	0	0	0	0	0	0	0	0	0	0	0	0	0
5	0.1.22.2.7.2	Clostridiaceae	10127	8	0	0	1	4	2	5	6	0	3	0	0	1	2	3	0	22	0	604	109	39	106	127	68	9	42	23	134	44	445	0	619	732	2	45	24	7	6	0	4	0	0	8	0	0	5
6	0.1.22.2.7.2.1	Anaerobacter	4	0	0	0	0	0	0	0	0	0	0	0	0	0	0	0	0	0	0	0	0	0	0	0	0	0	0	0	0	0	0	0	0	0	0	0	0	0	0	0	0	0	0	0	0	0	0
6	0.1.22.2.7.2.2	Candidatus_Arthromitus	2	0	0	0	0	0	0	0	0	0	0	0	0	0	0	0	0	0	0	0	0	0	0	0	0	0	0	0	0	0	0	0	0	0	0	0	0	0	0	0	0	0	0	0	0	0	0
6	0.1.22.2.7.2.3	Clostridiaceae_unclassified	1834	0	0	0	0	1	0	2	4	0	3	0	0	1	0	3	0	3	0	143	8	1	9	10	9	5	6	0	16	5	59	0	62	127	0	5	3	7	3	0	1	0	0	1	0	0	1
6	0.1.22.2.7.2.4	Clostridium_sensu_stricto_1	4259	7	0	0	1	1	2	3	1	0	0	0	0	0	1	0	0	13	0	394	83	37	83	95	14	4	34	18	15	13	362	0	529	544	1	40	19	0	1	0	0	0	0	0	0	0	1
6	0.1.22.2.7.2.5	Clostridium_sensu_stricto_13	5	0	0	0	0	0	0	0	0	0	0	0	0	0	0	0	0	2	0	0	0	0	0	0	0	0	0	0	0	0	0	0	0	0	0	0	0	0	0	0	0	0	0	0	0	0	0
6	0.1.22.2.7.2.6	Clostridium_sensu_stricto_14	2	0	0	0	0	0	0	0	0	0	0	0	0	0	0	0	0	0	0	0	0	0	0	0	0	0	0	0	0	0	0	0	0	0	0	0	0	0	0	0	0	0	0	0	0	0	0
6	0.1.22.2.7.2.7	Clostridium_sensu_stricto_17	1	0	0	0	0	0	0	0	0	0	0	0	0	0	0	0	0	0	0	0	0	0	0	0	0	0	0	0	0	0	0	0	0	0	0	0	0	0	0	0	0	0	0	0	0	0	0
6	0.1.22.2.7.2.8	Clostridium_sensu_stricto_19	6	0	0	0	0	0	0	0	0	0	0	0	0	0	0	0	0	0	0	1	0	0	1	0	0	0	0	0	0	0	0	0	0	2	0	0	0	0	0	0	0	0	0	0	0	0	0
6	0.1.22.2.7.2.9	Clostridium_sensu_stricto_2	46	0	0	0	0	1	0	0	1	0	0	0	0	0	1	0	0	1	0	2	1	0	3	1	0	0	0	0	1	1	4	0	9	8	0	0	0	0	2	0	0	0	0	0	0	0	0
6	0.1.22.2.7.2.10	Clostridium_sensu_stricto_3	11	0	0	0	0	0	0	0	0	0	0	0	0	0	0	0	0	0	0	0	0	0	0	2	0	0	0	1	0	0	0	0	0	0	0	0	0	0	0	0	0	0	0	0	0	0	0
6	0.1.22.2.7.2.11	Clostridium_sensu_stricto_5	194	0	0	0	0	0	0	0	0	0	0	0	0	0	0	0	0	1	0	57	6	0	5	2	0	0	2	0	1	0	17	0	3	47	0	0	1	0	0	0	0	0	0	1	0	0	0
6	0.1.22.2.7.2.12	Clostridium_sensu_stricto_6	2	0	0	0	0	0	0	0	0	0	0	0	0	0	0	0	0	0	0	0	0	0	0	0	0	0	0	0	0	0	0	0	0	0	0	0	0	0	0	0	0	0	0	0	0	0	0
6	0.1.22.2.7.2.13	Clostridium_sensu_stricto_8	18	0	0	0	0	0	0	0	0	0	0	0	0	0	0	0	0	0	0	1	0	0	0	0	0	0	0	0	0	0	0	0	0	0	0	0	0	0	0	0	0	0	0	0	0	0	0
6	0.1.22.2.7.2.14	Haloimpatiens	1	0	0	0	0	0	0	0	0	0	0	0	0	0	0	0	0	0	0	0	0	0	0	0	0	0	0	0	0	0	0	0	0	0	0	0	0	0	0	0	0	0	0	0	0	0	0
6	0.1.22.2.7.2.15	Oceanirhabdus	3	0	0	0	0	0	0	0	0	0	0	0	0	0	0	0	0	0	0	0	0	0	0	0	0	0	0	0	0	0	0	0	0	0	0	0	0	0	0	0	0	0	0	0	0	0	0
6	0.1.22.2.7.2.16	Sarcina	3739	1	0	0	0	1	0	0	0	0	0	0	0	0	0	0	0	2	0	6	11	1	5	17	45	0	0	4	101	25	3	0	16	4	1	0	1	0	0	0	3	0	0	6	0	0	3
5	0.1.22.2.7.3	Clostridiales_unclassified	63	0	0	0	0	1	0	0	0	0	0	0	0	3	0	0	0	1	0	2	0	1	0	0	0	2	1	0	1	0	1	0	2	0	0	0	0	0	0	0	0	0	0	1	0	0	0
6	0.1.22.2.7.3.1	Clostridiales_unclassified	63	0	0	0	0	1	0	0	0	0	0	0	0	3	0	0	0	1	0	2	0	1	0	0	0	2	1	0	1	0	1	0	2	0	0	0	0	0	0	0	0	0	0	1	0	0	0
5	0.1.22.2.7.4	uncultured	23	0	0	0	0	0	0	0	0	0	0	0	0	0	0	0	0	0	0	0	1	0	0	0	0	1	2	0	1	1	0	0	2	0	4	0	0	0	0	0	0	0	0	0	0	0	0
6	0.1.22.2.7.4.1	uncultured_ge	23	0	0	0	0	0	0	0	0	0	0	0	0	0	0	0	0	0	0	0	1	0	0	0	0	1	2	0	1	1	0	0	2	0	4	0	0	0	0	0	0	0	0	0	0	0	0
4	0.1.22.2.8	Eubacteriales	126	0	0	0	0	0	1	0	1	0	0	0	0	0	0	0	0	3	0	15	0	0	1	0	3	0	0	2	2	0	0	0	6	3	0	0	0	0	0	0	0	0	0	0	0	0	0
5	0.1.22.2.8.1	Anaerofustaceae	113	0	0	0	0	0	1	0	1	0	0	0	0	0	0	0	0	3	0	15	0	0	1	0	1	0	0	1	2	0	0	0	3	2	0	0	0	0	0	0	0	0	0	0	0	0	0
6	0.1.22.2.8.1.1	Anaerofustis	113	0	0	0	0	0	1	0	1	0	0	0	0	0	0	0	0	3	0	15	0	0	1	0	1	0	0	1	2	0	0	0	3	2	0	0	0	0	0	0	0	0	0	0	0	0	0
5	0.1.22.2.8.2	Eubacteriaceae	11	0	0	0	0	0	0	0	0	0	0	0	0	0	0	0	0	0	0	0	0	0	0	0	2	0	0	0	0	0	0	0	3	1	0	0	0	0	0	0	0	0	0	0	0	0	0
6	0.1.22.2.8.2.1	Eubacterium	11	0	0	0	0	0	0	0	0	0	0	0	0	0	0	0	0	0	0	0	0	0	0	0	2	0	0	0	0	0	0	0	3	1	0	0	0	0	0	0	0	0	0	0	0	0	0
5	0.1.22.2.8.3	Eubacteriales_unclassified	2	0	0	0	0	0	0	0	0	0	0	0	0	0	0	0	0	0	0	0	0	0	0	0	0	0	0	1	0	0	0	0	0	0	0	0	0	0	0	0	0	0	0	0	0	0	0
6	0.1.22.2.8.3.1	Eubacteriales_unclassified	2	0	0	0	0	0	0	0	0	0	0	0	0	0	0	0	0	0	0	0	0	0	0	0	0	0	0	1	0	0	0	0	0	0	0	0	0	0	0	0	0	0	0	0	0	0	0
4	0.1.22.2.9	Lachnospirales	201692	782	1	3	9	1872	2193	961	289	0	1728	0	1510	937	278	932	1427	6347	0	2363	1161	1175	2818	1258	1274	417	1772	1157	1433	562	10440	0	7122	1755	2500	1365	4384	44	47	0	23	95	0	63	25	22	67
5	0.1.22.2.9.1	Defluviitaleaceae	1302	13	0	0	0	2	2	3	3	0	1	0	0	2	0	6	3	4	0	8	3	3	3	0	16	3	2	0	5	15	2	0	55	4	0	8	6	0	1	0	0	0	0	0	0	0	0
6	0.1.22.2.9.1.1	Defluviitaleaceae_UCG-011	1275	13	0	0	0	2	2	3	3	0	1	0	0	2	0	6	3	4	0	8	3	3	3	0	16	3	2	0	5	15	2	0	55	4	0	7	6	0	1	0	0	0	0	0	0	0	0
6	0.1.22.2.9.1.2	Defluviitaleaceae_unclassified	27	0	0	0	0	0	0	0	0	0	0	0	0	0	0	0	0	0	0	0	0	0	0	0	0	0	0	0	0	0	0	0	0	0	0	1	0	0	0	0	0	0	0	0	0	0	0
5	0.1.22.2.9.2	Lachnospiraceae	200045	767	1	3	9	1869	2191	957	286	0	1724	0	1506	932	278	926	1422	6343	0	2345	1157	1168	2812	1256	1248	411	1767	1151	1383	544	10420	0	7056	1746	2499	1357	4369	43	46	0	23	95	0	63	25	21	65
6	0.1.22.2.9.2.1	28-4	473	0	0	0	0	0	0	0	0	0	0	0	1	0	0	1	0	1	0	0	0	0	0	0	0	0	1	0	0	0	3	0	0	2	0	1	8	0	0	0	0	0	0	0	1	0	0
6	0.1.22.2.9.2.2	A2	4	0	0	0	0	0	0	1	0	0	0	0	0	0	0	0	0	0	0	0	0	0	0	0	0	0	0	0	0	0	0	0	3	0	0	0	0	0	0	0	0	0	0	0	0	0	0
6	0.1.22.2.9.2.3	ASF356	9	0	0	0	0	0	0	0	0	0	0	0	0	0	0	0	0	0	0	0	0	0	0	0	0	0	0	0	0	0	0	0	0	0	0	0	0	0	0	0	0	0	0	0	0	0	0
6	0.1.22.2.9.2.4	Acetatifactor	32	0	0	0	0	0	0	0	0	0	0	0	0	1	0	0	0	0	0	2	0	2	2	0	0	0	0	0	0	0	0	0	8	0	3	0	0	0	0	0	0	0	0	0	0	0	0
6	0.1.22.2.9.2.5	Acetitomaculum	2706	15	0	0	0	1	6	3	3	0	6	0	12	3	3	5	7	23	0	182	25	15	30	20	14	13	7	12	71	23	50	0	1312	19	26	20	14	0	0	0	0	3	0	0	0	0	0
6	0.1.22.2.9.2.6	Agathobacter	5783	0	0	0	0	0	0	0	0	0	2	0	6	3	0	0	2	11	0	0	1	3	6	8	0	0	0	2	2	0	9	0	3	2	2	4	5	0	1	0	0	3	0	3	0	1	0
6	0.1.22.2.9.2.7	Anaerobium	216	0	0	0	0	2	1	0	0	0	1	0	4	0	0	0	0	3	0	4	0	2	0	2	0	1	2	2	1	0	6	0	0	2	0	1	1	0	0	0	0	0	0	0	0	0	0
6	0.1.22.2.9.2.8	Anaerocolumna	90	0	0	0	0	0	0	0	0	0	0	0	0	0	0	0	0	0	0	0	0	0	0	0	0	0	0	0	0	0	0	0	0	0	0	0	0	0	0	0	0	0	0	0	0	0	0
6	0.1.22.2.9.2.9	Anaerosporobacter	958	0	0	0	0	0	0	0	0	0	1	0	2	0	0	0	1	2	0	14	27	42	20	16	0	0	0	1	0	0	35	0	82	18	1	3	5	0	0	0	0	0	0	0	0	0	0
6	0.1.22.2.9.2.10	Anaerostignum	618	0	0	0	0	0	0	0	0	0	0	0	0	0	0	0	1	1	0	0	0	0	1	0	0	0	0	0	0	0	1	0	3	0	0	0	0	0	1	0	0	0	0	3	0	0	0
6	0.1.22.2.9.2.11	Anaerostipes	83	0	0	0	0	0	0	0	0	0	0	0	0	0	0	0	0	0	0	0	0	0	0	0	0	0	0	0	0	0	0	0	0	0	0	0	0	0	0	0	0	0	0	0	0	0	0
6	0.1.22.2.9.2.12	Blautia	758	0	0	0	0	0	2	0	0	0	2	0	0	0	0	0	0	7	0	16	0	3	0	0	3	0	1	2	8	0	15	0	25	10	2	5	7	0	0	0	0	0	0	0	0	0	0
6	0.1.22.2.9.2.13	Butyrivibrio	28518	155	0	0	2	1268	571	366	104	0	779	0	701	128	47	604	227	3359	0	444	182	156	675	312	13	27	148	138	122	63	3814	0	413	113	474	364	2470	3	3	0	0	19	0	10	7	2	14
6	0.1.22.2.9.2.14	CAG-56	79	0	0	0	0	0	0	0	0	0	0	0	0	0	0	0	0	0	0	0	0	0	0	0	1	0	0	0	0	0	0	0	0	0	0	0	0	0	0	0	0	0	0	0	0	0	0
6	0.1.22.2.9.2.15	CHKCI001	7	0	0	0	0	0	0	0	0	0	0	0	0	0	0	0	0	0	0	0	0	0	0	0	0	0	0	0	0	0	0	0	0	0	0	0	0	0	0	0	0	0	0	0	0	0	0
6	0.1.22.2.9.2.16	Catenibacillus	18	1	0	0	0	0	0	0	0	0	0	0	0	0	0	0	0	0	0	0	0	0	0	0	0	0	0	0	0	0	0	0	0	0	0	0	0	0	1	0	0	0	0	0	0	0	0
6	0.1.22.2.9.2.17	Coprococcus	5129	8	0	0	0	27	8	0	3	0	3	0	44	10	1	12	5	111	0	9	17	28	139	31	16	4	8	3	13	8	479	0	52	62	14	31	16	0	0	0	0	1	0	0	0	0	0
6	0.1.22.2.9.2.18	Cuneatibacter	17	0	0	0	0	0	0	0	0	0	0	0	0	0	0	0	0	0	0	0	0	1	0	0	0	0	0	0	0	0	0	0	0	0	0	0	1	0	0	0	0	0	0	0	0	0	0
6	0.1.22.2.9.2.19	Dorea	828	0	0	0	0	0	0	0	0	0	0	0	0	0	0	0	0	0	0	0	0	0	0	0	0	0	0	0	0	0	1	0	0	0	0	0	0	0	0	0	0	0	0	0	0	1	1
6	0.1.22.2.9.2.20	Eisenbergiella	137	0	0	0	0	0	0	0	0	0	1	0	0	0	0	0	0	0	0	0	0	0	0	0	0	0	0	0	0	0	1	0	0	1	0	0	0	0	0	0	0	0	0	0	0	0	0
6	0.1.22.2.9.2.21	Epulopiscium	2	0	0	0	0	0	0	0	0	0	0	0	0	0	0	0	0	0	0	0	0	0	0	0	0	0	0	0	0	0	0	0	0	0	0	0	0	0	0	0	0	0	0	0	0	0	0
6	0.1.22.2.9.2.22	FD2005	3327	1	0	0	0	1	173	14	9	0	111	0	2	20	7	1	572	38	0	50	51	4	15	18	2	3	75	32	4	11	81	0	36	37	39	6	6	0	0	0	0	3	0	2	0	4	1
6	0.1.22.2.9.2.23	Frisingicoccus	233	0	0	0	0	0	0	0	0	0	0	0	9	0	0	0	0	0	0	0	0	0	0	0	0	0	1	1	0	0	0	0	2	0	0	0	6	0	0	0	1	1	0	0	0	0	0
6	0.1.22.2.9.2.24	Fusicatenibacter	30	0	0	0	0	0	0	0	0	0	0	0	0	1	0	0	1	0	0	0	0	0	0	0	1	2	0	0	4	1	3	0	4	1	2	0	0	0	0	0	0	0	0	0	0	0	0
6	0.1.22.2.9.2.25	GCA-900066575	101	0	0	0	0	0	0	0	0	0	0	0	0	0	0	0	0	0	0	0	0	0	0	0	1	0	0	0	0	0	0	0	0	0	1	0	0	0	0	0	0	0	0	0	0	0	0
6	0.1.22.2.9.2.26	GCA-900066755	45	0	0	0	0	0	0	0	0	0	0	0	0	0	0	0	0	0	0	0	0	0	0	0	0	0	0	0	0	0	0	0	0	0	0	0	0	0	0	0	0	0	0	0	0	0	0
6	0.1.22.2.9.2.27	Herbinix	2	0	0	0	0	0	0	0	0	0	0	0	0	0	0	0	0	0	0	0	0	0	0	0	0	0	0	0	0	0	0	0	0	0	0	0	0	0	0	0	0	0	0	0	0	0	0
6	0.1.22.2.9.2.28	Hespellia	52	0	0	0	0	0	0	0	0	0	0	0	0	0	0	0	0	0	0	0	0	0	0	0	0	0	0	0	0	0	0	0	0	0	0	0	0	0	0	0	0	0	0	0	0	0	0
6	0.1.22.2.9.2.29	Howardella	44	0	0	0	0	0	0	0	0	0	0	0	0	0	1	0	0	0	0	1	0	1	0	0	0	1	0	0	2	0	2	0	6	0	0	2	0	0	0	0	0	0	0	0	0	0	0
6	0.1.22.2.9.2.30	Hungatella	1264	0	0	0	0	0	0	0	0	0	0	0	0	0	0	0	0	1	0	0	0	0	0	0	0	0	0	0	0	0	0	0	1	0	0	1	0	0	0	0	0	0	0	0	0	0	0
6	0.1.22.2.9.2.31	Incertae_Sedis	351	0	0	0	0	0	0	0	0	0	1	0	1	0	0	0	0	0	0	0	0	0	0	0	0	0	0	0	0	3	2	0	0	0	0	0	1	0	0	0	0	0	0	0	0	0	0
6	0.1.22.2.9.2.32	Lachnoanaerobaculum	3	0	0	0	0	0	0	0	0	0	0	0	0	0	0	0	0	0	0	0	0	0	1	0	0	0	0	0	0	0	0	0	0	0	0	0	0	0	0	0	0	0	0	0	0	0	0
6	0.1.22.2.9.2.33	Lachnobacterium	162	2	0	0	0	0	7	0	0	0	0	0	2	0	0	1	5	2	0	11	2	4	3	2	1	6	11	9	3	1	10	0	1	4	5	2	5	0	0	0	0	0	0	0	0	0	0
6	0.1.22.2.9.2.34	Lachnoclostridium	2440	6	0	0	0	8	8	7	0	0	12	0	3	17	1	2	4	57	0	17	2	3	2	6	37	0	20	4	15	10	15	0	5	5	15	2	18	0	0	0	0	1	0	0	0	0	0
6	0.1.22.2.9.2.35	Lachnospira	204	0	0	0	0	0	0	0	0	0	1	0	3	0	0	0	0	1	0	0	0	0	1	0	0	0	0	0	0	0	0	0	0	0	0	0	0	1	0	0	0	0	0	0	0	0	0
6	0.1.22.2.9.2.36	Lachnospiraceae_AC2044_group	2881	2	0	1	0	0	7	40	0	0	6	0	1	1	5	0	5	136	0	7	119	6	127	45	19	0	31	4	14	0	74	0	41	125	14	103	17	1	0	0	0	0	0	0	0	1	0
6	0.1.22.2.9.2.37	Lachnospiraceae_FCS020_group	7004	0	0	0	0	0	0	0	3	0	0	0	1	0	0	1	2	6	0	4	0	0	13	1	5	1	1	0	9	0	4	0	6	1	5	2	7	0	0	0	0	1	0	0	0	0	1
6	0.1.22.2.9.2.38	Lachnospiraceae_FE2018_group	239	1	0	0	0	1	1	1	0	0	0	0	0	0	0	0	0	2	0	4	0	4	1	9	14	7	3	2	7	2	63	0	57	1	6	7	10	0	0	0	0	0	0	0	0	0	0
6	0.1.22.2.9.2.39	Lachnospiraceae_NC2004_group	234	0	0	0	0	0	0	0	0	0	3	0	0	0	0	0	0	0	0	0	0	0	0	0	0	0	0	0	0	0	0	0	0	0	2	0	0	0	0	0	0	0	0	0	0	0	0
6	0.1.22.2.9.2.40	Lachnospiraceae_ND3007_group	567	0	0	0	0	0	2	2	0	0	4	0	4	7	2	0	2	21	0	2	7	1	32	0	4	0	0	3	1	0	27	0	13	12	38	2	13	0	0	0	0	0	0	0	0	0	0
6	0.1.22.2.9.2.41	Lachnospiraceae_NK3A20_group	9812	149	1	0	2	74	33	115	23	0	104	0	40	66	8	55	128	183	0	429	70	147	180	75	151	33	48	26	103	46	703	0	2532	306	426	64	92	1	2	0	3	10	0	1	4	0	4
6	0.1.22.2.9.2.42	Lachnospiraceae_NK4A136_group	12722	4	0	0	0	2	10	0	0	0	12	0	45	2	5	12	51	422	0	12	135	47	204	83	2	3	21	17	3	13	290	0	48	173	43	82	297	0	0	0	1	4	0	0	0	0	0
6	0.1.22.2.9.2.43	Lachnospiraceae_NK4B4_group	150	0	0	0	0	0	0	0	0	0	0	0	0	0	0	0	0	1	0	0	0	0	0	0	0	0	0	0	0	0	0	0	1	1	0	1	0	0	0	0	0	0	0	0	0	0	0
6	0.1.22.2.9.2.44	Lachnospiraceae_UCG-001	1011	9	0	0	0	8	5	2	0	0	1	0	1	8	6	0	8	60	0	5	10	7	40	9	0	1	8	5	4	5	188	0	15	3	13	11	35	0	0	0	0	1	0	0	0	0	0
6	0.1.22.2.9.2.45	Lachnospiraceae_UCG-002	621	1	0	0	0	2	3	1	0	0	0	0	1	0	0	0	0	1	0	4	3	3	0	4	2	0	1	0	0	4	12	0	37	4	3	3	5	0	0	0	0	0	0	0	0	0	0
6	0.1.22.2.9.2.46	Lachnospiraceae_UCG-003	55	0	0	0	0	0	0	0	0	0	0	0	0	0	0	0	0	2	0	1	1	1	0	1	0	0	1	0	2	0	1	0	0	0	1	0	0	0	0	0	0	2	0	0	0	0	0
6	0.1.22.2.9.2.47	Lachnospiraceae_UCG-004	1521	0	0	0	0	0	3	0	0	0	0	0	0	1	0	0	0	1	0	8	0	1	0	0	0	1	25	0	0	0	2	0	6	0	4	0	0	1	0	0	0	0	0	0	0	0	0
6	0.1.22.2.9.2.48	Lachnospiraceae_UCG-006	223	5	0	0	0	0	0	0	1	0	2	0	1	2	1	0	0	4	0	2	0	0	0	0	0	1	2	0	15	3	4	0	5	1	2	1	0	0	0	0	0	0	0	0	0	0	0
6	0.1.22.2.9.2.49	Lachnospiraceae_UCG-007	32	0	0	0	0	0	1	0	0	0	0	0	1	0	0	0	0	0	0	0	0	0	0	0	0	0	0	0	0	0	0	0	0	0	0	0	0	0	0	0	0	0	0	0	0	0	0
6	0.1.22.2.9.2.50	Lachnospiraceae_UCG-008	933	4	0	0	0	5	5	4	5	0	12	0	2	16	9	6	3	21	0	13	6	0	15	3	49	17	4	9	21	19	24	0	97	15	20	16	19	0	0	0	0	0	0	0	0	0	0
6	0.1.22.2.9.2.51	Lachnospiraceae_UCG-009	23	0	0	0	0	0	1	0	0	0	0	0	0	0	0	0	0	1	0	0	0	0	1	0	0	0	1	0	0	0	4	0	0	0	0	1	0	0	0	0	0	0	0	0	0	0	0
6	0.1.22.2.9.2.52	Lachnospiraceae_UCG-010	2859	0	0	0	0	1	1	8	3	0	1	0	0	2	2	5	2	21	0	9	2	13	9	4	1	6	4	2	18	7	22	0	30	21	7	14	9	6	0	0	0	0	0	0	0	0	1
6	0.1.22.2.9.2.53	Lachnospiraceae_XPB1014_group	3171	0	0	0	0	78	21	38	0	0	1	0	1	16	1	46	23	108	0	99	7	8	16	51	23	5	654	139	71	3	209	0	102	197	311	4	109	1	0	0	0	1	0	0	0	1	1
6	0.1.22.2.9.2.54	Lachnospiraceae_ge	9455	59	0	0	2	102	747	78	19	0	129	0	287	65	60	15	45	145	0	342	98	120	277	106	87	47	59	354	237	48	636	0	334	109	234	56	439	2	0	0	0	4	0	1	0	2	3
6	0.1.22.2.9.2.55	Lachnospiraceae_unclassified	63422	98	0	2	2	105	429	116	56	0	392	0	201	86	67	64	153	674	0	343	233	194	396	253	169	86	424	232	217	140	948	0	733	324	299	197	509	27	37	0	17	25	0	36	9	7	36
6	0.1.22.2.9.2.56	Lachnotalea	51	0	0	0	0	0	0	0	0	0	0	0	0	0	0	0	0	0	0	0	0	0	0	0	0	0	0	0	0	0	0	0	1	0	1	0	0	0	0	0	0	0	0	0	0	0	0
6	0.1.22.2.9.2.57	Lactonifactor	131	0	0	0	0	1	1	0	0	0	0	0	0	0	0	0	1	0	0	1	1	0	0	2	0	0	1	0	1	0	3	0	5	0	0	0	0	0	0	0	0	1	0	0	0	0	0
6	0.1.22.2.9.2.58	Marvinbryantia	1370	12	0	0	0	3	4	3	3	0	5	0	1	10	1	1	6	32	0	99	13	8	7	8	36	11	3	8	31	10	93	0	205	14	24	19	14	0	0	0	0	1	0	0	0	0	0
6	0.1.22.2.9.2.59	Mobilisporobacter	6	0	0	0	0	0	0	0	0	0	0	0	0	0	0	0	0	0	0	0	0	0	0	0	0	0	0	0	0	0	0	0	0	0	0	0	0	0	0	0	0	0	0	0	0	0	0
6	0.1.22.2.9.2.60	Mobilitalea	10	0	0	0	0	0	0	0	0	0	0	0	0	0	0	0	0	0	0	0	0	0	0	0	0	0	0	0	1	0	0	0	0	0	0	0	0	0	0	0	0	0	0	0	0	0	0
6	0.1.22.2.9.2.61	Moryella	1013	1	0	0	0	2	10	7	5	0	6	0	0	4	2	7	11	42	0	29	2	2	12	1	46	8	36	16	35	11	12	0	8	20	15	1	8	0	0	0	0	0	0	3	0	0	0
6	0.1.22.2.9.2.62	Oribacterium	2508	44	0	0	0	9	24	30	9	0	12	0	8	50	10	8	14	46	0	52	4	6	12	5	221	15	73	12	46	22	189	0	54	12	96	13	29	0	0	0	0	2	0	0	0	1	0
6	0.1.22.2.9.2.63	Parasporobacterium	15	0	0	0	0	1	0	0	0	0	0	0	0	0	0	0	0	0	0	0	0	0	0	0	0	0	1	0	0	0	0	0	0	0	0	0	0	0	0	0	0	0	0	0	0	0	0
6	0.1.22.2.9.2.64	Pseudobutyrivibrio	11678	156	0	0	1	144	35	49	21	0	54	0	85	377	17	51	99	593	0	29	76	227	134	118	13	3	26	77	155	35	1750	0	189	44	87	270	88	0	0	0	1	9	0	0	3	0	1
6	0.1.22.2.9.2.65	Robinsoniella	80	0	0	0	0	0	0	0	0	0	0	0	0	0	0	0	0	0	0	0	0	0	0	0	0	0	0	0	0	0	0	0	0	0	0	0	0	0	0	0	0	0	0	0	0	0	0
6	0.1.22.2.9.2.66	Roseburia	3537	0	0	0	0	1	4	38	0	0	4	0	13	1	2	0	5	32	0	17	25	10	23	14	240	5	6	10	17	4	109	0	293	12	159	15	30	0	1	0	0	0	0	1	1	0	0
6	0.1.22.2.9.2.67	Sellimonas	321	0	0	0	0	0	0	0	0	0	0	0	0	0	0	0	0	0	0	0	0	0	0	0	0	0	0	0	0	0	0	0	0	0	0	0	0	0	0	0	0	0	0	0	0	0	0
6	0.1.22.2.9.2.68	Shuttleworthia	1307	14	0	0	0	8	48	13	11	0	34	0	5	15	6	22	19	17	0	24	7	54	46	4	31	83	33	5	51	15	72	0	101	23	28	6	21	0	0	0	0	1	0	1	0	0	0
6	0.1.22.2.9.2.69	Sporobacterium	16	0	0	0	0	0	0	0	0	0	0	0	0	0	0	0	0	0	0	0	0	0	0	0	0	0	0	0	0	0	0	0	0	0	0	0	0	0	0	0	0	0	0	0	0	0	0
6	0.1.22.2.9.2.70	Stomatobaculum	15	0	0	0	0	0	0	0	0	0	0	0	0	0	0	0	0	0	0	1	0	0	0	0	0	0	0	0	0	0	0	0	0	0	0	0	0	0	0	0	0	0	0	0	0	0	0
6	0.1.22.2.9.2.71	Syntrophococcus	601	0	0	0	0	0	5	3	0	0	4	0	4	2	1	1	2	17	0	17	9	7	14	10	33	8	6	7	17	16	45	0	84	20	20	6	15	0	0	0	0	0	0	0	0	0	0
6	0.1.22.2.9.2.72	Tuzzerella	1677	0	0	0	0	0	0	0	0	0	0	0	0	0	0	0	0	0	0	0	0	0	2	0	0	0	0	0	0	0	0	0	0	0	0	0	0	0	0	0	0	0	0	0	0	0	0
6	0.1.22.2.9.2.73	Tyzzerella	1575	6	0	0	0	7	14	17	6	0	13	0	5	14	5	1	5	40	0	6	8	22	38	29	9	12	14	11	50	11	371	0	39	23	49	17	36	0	0	0	0	2	0	2	0	1	1
6	0.1.22.2.9.2.74	UC5-1-2E3	76	0	0	0	0	0	0	0	0	0	0	0	0	0	0	0	0	0	0	0	0	0	0	0	0	0	0	0	0	0	0	0	0	0	0	0	0	0	0	0	0	0	0	0	0	0	1
6	0.1.22.2.9.2.75	XBB1006	530	7	0	0	0	7	0	1	0	0	4	0	1	4	2	5	12	69	0	3	6	14	57	4	0	1	2	1	3	4	27	0	15	4	1	1	1	0	0	0	0	0	0	0	0	0	0
6	0.1.22.2.9.2.76	possible_genus_Sk018	675	2	0	0	0	0	0	0	0	0	0	0	0	0	5	0	0	19	0	7	0	1	253	0	1	0	3	0	0	0	4	0	13	0	6	1	0	0	0	0	0	0	0	0	0	0	0
6	0.1.22.2.9.2.77	probable_genus_10	62	0	0	0	0	0	0	0	0	0	0	0	0	0	0	0	0	4	0	24	8	0	0	0	0	0	0	1	0	0	1	0	6	0	0	0	0	0	0	0	0	0	0	0	0	0	0
6	0.1.22.2.9.2.78	uncultured	1133	5	0	0	0	1	1	0	2	0	1	0	8	0	1	0	1	6	0	2	0	1	8	2	3	0	2	4	9	6	6	0	30	5	1	2	3	0	0	0	0	0	0	0	0	0	0
5	0.1.22.2.9.3	Lachnospirales_unclassified	344	2	0	0	0	1	0	1	0	0	3	0	4	3	0	0	2	0	0	10	1	4	3	2	10	3	3	5	45	3	18	0	11	5	1	0	9	1	0	0	0	0	0	0	0	1	2
6	0.1.22.2.9.3.1	Lachnospirales_unclassified	344	2	0	0	0	1	0	1	0	0	3	0	4	3	0	0	2	0	0	10	1	4	3	2	10	3	3	5	45	3	18	0	11	5	1	0	9	1	0	0	0	0	0	0	0	1	2
5	0.1.22.2.9.4	uncultured	1	0	0	0	0	0	0	0	0	0	0	0	0	0	0	0	0	0	0	0	0	0	0	0	0	0	0	1	0	0	0	0	0	0	0	0	0	0	0	0	0	0	0	0	0	0	0
6	0.1.22.2.9.4.1	uncultured_ge	1	0	0	0	0	0	0	0	0	0	0	0	0	0	0	0	0	0	0	0	0	0	0	0	0	0	0	1	0	0	0	0	0	0	0	0	0	0	0	0	0	0	0	0	0	0	0
4	0.1.22.2.10	Monoglobales	13354	23	0	2	0	43	26	3	21	0	17	0	8	13	15	22	42	45	0	5	15	10	22	88	14	39	75	49	66	27	88	0	55	24	72	25	97	2	8	0	3	4	0	1	0	0	2
5	0.1.22.2.10.1	Monoglobaceae	13354	23	0	2	0	43	26	3	21	0	17	0	8	13	15	22	42	45	0	5	15	10	22	88	14	39	75	49	66	27	88	0	55	24	72	25	97	2	8	0	3	4	0	1	0	0	2
6	0.1.22.2.10.1.1	Monoglobus	13354	23	0	2	0	43	26	3	21	0	17	0	8	13	15	22	42	45	0	5	15	10	22	88	14	39	75	49	66	27	88	0	55	24	72	25	97	2	8	0	3	4	0	1	0	0	2
4	0.1.22.2.11	Oscillospirales	758371	4337	1	8	30	8499	9869	1723	10003	1	2302	1	1467	1817	3738	9290	2686	12130	0	3403	3177	5367	8091	6276	4641	9410	3867	6184	11226	9267	12094	7	7891	4217	5937	3179	7329	154	179	0	174	140	0	329	64	33	229
5	0.1.22.2.11.1	Butyricicoccaceae	16271	588	0	0	0	224	24	2	159	0	35	0	17	6	210	43	32	933	0	21	168	926	30	42	75	745	66	24	76	477	510	0	560	152	20	262	91	0	6	0	3	0	0	7	2	0	5
6	0.1.22.2.11.1.1	Butyricicoccaceae_unclassified	268	5	0	0	0	1	0	0	2	0	0	0	0	0	2	1	1	4	0	0	2	9	0	1	0	9	0	0	1	2	16	0	7	0	0	2	0	0	0	0	0	0	0	0	0	0	1
6	0.1.22.2.11.1.2	Butyricicoccus	229	0	0	0	0	0	0	0	0	0	0	0	0	0	0	0	0	0	0	0	0	0	0	0	0	0	0	0	0	0	0	0	0	0	0	0	0	0	0	0	0	0	0	0	0	0	0
6	0.1.22.2.11.1.3	UCG-008	671	2	0	0	0	1	3	0	5	0	0	0	1	2	1	0	0	22	0	6	6	0	3	2	61	3	8	2	30	3	6	0	90	12	3	17	4	0	0	0	1	0	0	0	0	0	0
6	0.1.22.2.11.1.4	UCG-009	15039	581	0	0	0	222	20	2	152	0	35	0	16	4	207	40	29	907	0	15	160	916	27	39	13	732	58	22	45	470	487	0	463	140	17	243	87	0	6	0	2	0	0	4	2	0	4
6	0.1.22.2.11.1.5	uncultured	64	0	0	0	0	0	1	0	0	0	0	0	0	0	0	2	2	0	0	0	0	1	0	0	1	1	0	0	0	2	1	0	0	0	0	0	0	0	0	0	0	0	0	3	0	0	0
5	0.1.22.2.11.2	Ethanoligenenaceae	686	0	0	0	0	32	10	0	9	0	2	0	0	3	9	29	8	12	0	2	1	1	1	2	3	14	3	3	76	33	2	0	2	2	2	1	3	1	0	0	0	0	0	3	2	0	0
6	0.1.22.2.11.2.1	Acetanaerobacterium	167	0	0	0	0	0	0	0	0	0	0	0	0	0	0	0	0	1	0	0	0	1	0	2	0	0	0	0	0	0	0	0	0	1	0	0	0	0	0	0	0	0	0	0	2	0	0
6	0.1.22.2.11.2.2	Ethanoligenenaceae_ge	66	0	0	0	0	0	1	0	1	0	0	0	0	0	0	0	0	0	0	0	1	0	1	0	0	0	0	2	2	0	1	0	0	1	2	1	0	0	0	0	0	0	0	0	0	0	0
6	0.1.22.2.11.2.3	Ethanoligenenaceae_unclassified	47	0	0	0	0	1	0	0	0	0	0	0	0	0	0	0	0	0	0	0	0	0	0	0	1	2	0	0	1	0	0	0	0	0	0	0	2	1	0	0	0	0	0	0	0	0	0
6	0.1.22.2.11.2.4	Incertae_Sedis	406	0	0	0	0	31	9	0	8	0	2	0	0	3	9	29	8	11	0	2	0	0	0	0	2	12	3	1	73	33	1	0	2	0	0	0	1	0	0	0	0	0	0	3	0	0	0
5	0.1.22.2.11.3	Hungateiclostridiaceae	14516	117	0	0	1	84	951	91	148	0	120	1	75	21	157	67	149	1069	0	268	41	99	556	1077	104	440	133	77	880	217	902	0	437	230	206	82	418	3	0	0	2	2	0	5	0	0	3
6	0.1.22.2.11.3.1	Anaerobacterium	11	0	0	0	0	0	0	0	0	0	0	0	0	0	0	0	0	0	0	0	0	0	0	0	0	0	0	0	0	0	0	0	0	0	0	0	0	0	0	0	0	0	0	0	0	0	0
6	0.1.22.2.11.3.2	Cellulosibacter	13	0	0	0	0	0	0	0	0	0	0	0	0	0	0	0	0	0	0	0	0	0	0	1	0	0	0	0	0	0	0	0	0	0	0	0	0	0	0	0	0	0	0	0	0	0	0
6	0.1.22.2.11.3.3	Fastidiosipila	1	0	0	0	0	0	0	0	0	0	0	0	0	0	0	0	0	0	0	0	0	0	0	0	0	0	0	0	0	0	0	0	0	0	0	0	0	0	0	0	0	0	0	0	0	0	0
6	0.1.22.2.11.3.4	Hungateiclostridiaceae_ge	1	0	0	0	0	0	0	0	0	0	0	0	0	0	0	0	0	0	0	0	0	0	0	0	0	0	0	0	0	0	0	0	0	0	0	0	0	0	0	0	0	0	0	0	0	0	0
6	0.1.22.2.11.3.5	Hungateiclostridiaceae_unclassified	888	2	0	0	0	2	15	0	4	0	1	0	0	1	4	1	1	5	0	8	1	2	12	6	0	4	2	2	13	19	6	0	4	7	5	0	1	0	0	0	0	0	0	0	0	0	0
6	0.1.22.2.11.3.6	Pseudoclostridium	1	0	0	0	0	0	0	0	0	0	0	0	0	0	0	0	0	0	0	0	0	0	0	0	0	0	0	0	0	0	0	0	0	0	0	0	0	0	0	0	0	0	0	0	0	0	0
6	0.1.22.2.11.3.7	Ruminiclostridium	553	0	0	0	0	0	11	0	1	0	0	0	1	1	0	0	0	0	0	16	1	0	2	4	4	1	0	0	0	53	4	0	1	0	10	1	1	0	0	0	0	0	0	0	0	0	0
6	0.1.22.2.11.3.8	Saccharofermentans	12534	114	0	0	1	82	921	89	143	0	112	1	71	15	151	65	142	1041	0	241	30	92	523	1057	99	432	123	68	849	135	870	0	385	213	162	77	413	3	0	0	2	2	0	5	0	0	3
6	0.1.22.2.11.3.9	UCG-012	454	1	0	0	0	0	4	2	0	0	7	0	3	4	2	1	6	22	0	3	9	5	19	7	1	3	8	7	17	10	22	0	47	10	18	4	3	0	0	0	0	0	0	0	0	0	0
6	0.1.22.2.11.3.10	uncultured	60	0	0	0	0	0	0	0	0	0	0	0	0	0	0	0	0	1	0	0	0	0	0	2	0	0	0	0	1	0	0	0	0	0	11	0	0	0	0	0	0	0	0	0	0	0	0
5	0.1.22.2.11.4	Oscillospiraceae	441353	3097	1	1	23	5561	6792	1325	6988	1	1246	0	1008	1065	1721	4188	1409	7550	0	2018	2336	3475	6134	3869	3099	4511	2437	3508	6922	5275	7595	5	5126	2600	3448	2011	4695	83	100	0	85	73	0	177	37	16	97
6	0.1.22.2.11.4.1	Colidextribacter	9866	15	0	0	0	43	32	0	19	0	14	0	87	5	13	19	13	137	0	10	24	1	18	22	3	18	77	56	67	15	27	0	297	42	16	12	66	2	1	0	1	1	0	0	0	0	2
6	0.1.22.2.11.4.2	Flavonifractor	9021	0	0	0	0	0	0	0	1	0	0	0	0	0	1	0	0	2	0	1	0	1	0	0	0	3	0	1	4	3	3	0	6	0	1	10	0	0	0	0	1	0	0	9	1	1	1
6	0.1.22.2.11.4.3	Intestinimonas	1734	8	0	0	0	37	21	3	14	0	6	0	7	7	15	43	10	33	0	6	28	10	10	21	13	6	25	7	8	5	43	0	11	8	24	6	37	0	0	0	0	1	0	1	0	0	0
6	0.1.22.2.11.4.4	NK4A214_group	66533	1175	1	1	8	772	466	1058	1844	0	564	0	585	420	761	1081	715	3963	0	1154	1170	2472	3752	2168	1806	1014	773	2182	3267	913	4369	4	2672	977	1492	962	2428	14	6	0	2	11	0	26	10	0	11
6	0.1.22.2.11.4.5	Oscillibacter	6084	5	0	0	0	8	2	0	5	0	0	0	2	4	14	4	3	24	0	3	1	10	10	16	11	17	11	46	17	4	13	0	10	13	31	7	7	0	0	0	0	1	0	2	0	0	0
6	0.1.22.2.11.4.6	Oscillospira	14030	3	0	0	1	92	2	17	9	0	9	0	20	25	6	18	30	90	0	97	23	31	11	50	56	188	165	150	211	15	105	0	163	33	858	98	289	0	3	0	0	4	0	5	0	1	1
6	0.1.22.2.11.4.7	Oscillospiraceae_ge	779	3	0	0	0	1	2	3	59	0	1	0	3	4	2	7	10	18	0	1	1	6	4	15	3	20	5	12	9	74	18	0	31	17	4	5	14	1	1	0	2	0	0	3	1	0	5
6	0.1.22.2.11.4.8	Oscillospiraceae_unclassified	52703	271	0	0	5	570	888	74	864	0	129	0	88	105	131	238	125	516	0	228	197	267	249	364	254	494	291	398	730	302	487	0	387	295	303	130	479	43	57	0	57	11	0	57	17	4	35
6	0.1.22.2.11.4.9	Papillibacter	2748	2	0	0	0	32	27	17	28	0	38	0	6	18	27	26	26	140	0	24	46	49	48	80	29	54	20	42	59	33	118	0	182	77	41	49	74	0	0	0	0	0	0	3	0	0	1
6	0.1.22.2.11.4.10	Pseudoflavonifractor	2312	5	0	0	0	4	3	1	22	0	13	0	3	2	3	13	7	18	0	5	2	9	2	7	12	11	9	5	20	11	19	0	19	20	9	3	14	1	5	0	3	1	0	4	1	0	4
6	0.1.22.2.11.4.11	Sporobacter	1970	12	0	0	0	11	24	19	47	0	13	0	4	4	10	21	29	62	0	11	14	25	13	31	34	19	19	28	73	36	53	0	59	24	16	8	43	2	9	0	5	0	0	6	0	1	5
6	0.1.22.2.11.4.12	UCG-002	69290	1333	0	0	3	950	377	107	345	0	385	0	184	405	614	689	267	2040	0	297	684	361	1622	399	405	684	955	476	787	495	1931	1	414	606	243	441	957	9	6	0	3	17	0	10	1	2	6
6	0.1.22.2.11.4.13	UCG-003	738	2	0	0	0	1	0	0	0	0	0	0	1	2	2	1	1	0	0	0	1	2	3	3	1	3	1	3	5	1	2	0	1	0	2	2	0	1	0	0	0	0	0	1	1	0	0
6	0.1.22.2.11.4.14	UCG-005	194792	234	0	0	6	3000	4930	9	3609	1	51	0	11	51	95	1843	103	380	0	83	103	115	232	476	122	1940	43	52	1556	3056	242	0	634	428	127	248	160	9	12	0	11	26	0	45	5	7	26
6	0.1.22.2.11.4.15	UCG-007	955	1	0	0	0	5	3	0	1	0	1	0	0	0	0	2	3	7	0	1	1	0	3	2	3	4	2	2	7	2	4	0	33	6	1	3	1	0	0	0	0	0	0	2	0	0	0
6	0.1.22.2.11.4.16	V9D2013_group	2747	16	0	0	0	23	6	6	111	0	20	0	4	8	22	171	35	92	0	3	28	28	134	163	13	23	27	26	16	295	82	0	11	8	44	2	15	1	0	0	0	0	0	1	0	0	0
6	0.1.22.2.11.4.17	uncultured	5051	12	0	0	0	12	9	11	10	0	2	0	3	5	5	12	32	28	0	94	13	88	23	52	334	13	14	22	86	15	79	0	196	46	236	25	111	0	0	0	0	0	0	2	0	0	0
5	0.1.22.2.11.5	Oscillospirales_fa	91018	124	0	2	1	1763	1270	34	1385	0	321	0	107	193	1262	3922	281	255	0	62	104	144	123	214	203	2191	123	1413	1082	897	251	1	158	58	207	73	234	7	13	0	12	12	0	28	5	4	22
6	0.1.22.2.11.5.1	Hydrogenoanaerobacterium	504	0	0	0	0	1	0	0	2	0	1	0	1	2	0	3	1	8	0	0	2	1	8	5	2	1	0	2	1	0	7	0	3	3	6	0	3	0	0	0	0	1	0	0	0	0	0
6	0.1.22.2.11.5.2	Oscillospirales_fa_unclassified	91	0	0	0	0	2	1	0	1	0	1	0	0	0	1	3	0	1	0	0	0	0	0	0	0	0	1	0	1	0	0	0	0	0	1	0	0	1	0	0	0	0	0	0	0	0	0
6	0.1.22.2.11.5.3	Oscillospirales_ge	90423	124	0	2	1	1760	1269	34	1382	0	319	0	106	191	1261	3916	280	246	0	62	102	143	115	209	201	2190	122	1411	1080	897	244	1	155	55	200	73	231	6	13	0	12	11	0	28	5	4	22
5	0.1.22.2.11.6	Oscillospirales_unclassified	25501	84	0	2	1	117	174	33	285	0	87	0	48	34	58	128	107	257	0	98	48	149	76	146	76	232	174	230	312	175	258	0	201	123	121	47	207	15	17	0	26	11	0	38	12	4	41
6	0.1.22.2.11.6.1	Oscillospirales_unclassified	25501	84	0	2	1	117	174	33	285	0	87	0	48	34	58	128	107	257	0	98	48	149	76	146	76	232	174	230	312	175	258	0	201	123	121	47	207	15	17	0	26	11	0	38	12	4	41
5	0.1.22.2.11.7	Ruminococcaceae	75849	241	0	2	3	452	431	174	536	0	387	0	170	368	183	592	591	1702	0	676	343	456	1000	743	955	958	730	697	1518	1542	2361	1	999	808	1715	581	1382	15	24	0	20	36	0	42	6	5	28
6	0.1.22.2.11.7.1	Anaerofilum	194	0	0	0	0	0	0	0	0	0	0	0	0	0	0	1	0	0	0	0	0	0	0	0	0	0	0	0	1	0	0	0	0	0	0	0	0	0	0	0	0	0	0	0	0	0	0
6	0.1.22.2.11.7.2	Anaerotruncus	33	0	0	0	0	0	0	0	0	0	0	0	0	0	0	0	0	0	0	0	0	0	0	0	0	0	0	0	0	0	0	0	0	0	0	0	0	0	0	0	0	0	0	0	0	0	0
6	0.1.22.2.11.7.3	Angelakisella	726	0	0	0	0	5	5	0	2	0	1	0	0	3	3	7	3	7	0	1	2	11	55	7	4	5	4	0	13	11	19	0	5	5	4	2	3	0	0	0	0	1	0	0	0	0	0
6	0.1.22.2.11.7.4	CAG-352	949	7	0	0	0	27	4	2	3	0	4	0	4	11	0	1	19	14	0	55	13	2	15	43	5	15	10	58	15	84	27	0	29	37	8	39	6	0	0	0	0	0	0	0	0	0	0
6	0.1.22.2.11.7.5	Candidatus_Soleaferrea	3215	0	0	0	0	0	0	0	0	0	0	0	0	1	0	0	0	1	0	0	1	0	0	0	0	0	1	0	0	0	1	0	4	0	1	7	3	1	0	0	0	0	0	0	0	0	0
6	0.1.22.2.11.7.6	Caproiciproducens	254	0	0	0	0	0	0	0	0	0	0	0	0	0	0	2	0	0	0	0	0	0	0	0	0	0	0	0	0	0	1	0	0	0	0	0	0	0	0	0	0	0	0	0	0	0	0
6	0.1.22.2.11.7.7	DTU089	566	1	0	0	0	0	0	0	1	0	3	0	0	2	2	1	3	4	0	5	0	1	0	3	0	14	2	1	1	5	7	0	4	1	0	4	3	0	1	0	3	0	0	7	0	0	0
6	0.1.22.2.11.7.8	Faecalibacterium	83	0	0	0	0	0	0	0	0	0	0	0	0	0	0	0	0	0	0	0	0	0	0	0	0	0	0	0	0	0	0	0	0	0	0	0	0	0	0	0	0	0	0	0	0	0	0
6	0.1.22.2.11.7.9	Fournierella	367	0	0	0	0	0	0	0	0	0	0	0	0	0	0	0	0	0	0	0	0	0	0	0	0	0	0	0	0	0	0	0	0	0	0	0	0	0	0	0	1	0	0	0	0	0	0
6	0.1.22.2.11.7.10	Harryflintia	75	0	0	0	0	0	0	0	0	0	0	0	0	0	0	0	0	0	0	0	0	0	0	0	0	0	0	1	0	0	0	0	0	0	0	0	0	0	0	0	0	0	0	0	0	0	0
6	0.1.22.2.11.7.11	Incertae_Sedis	716	0	0	0	0	0	1	1	1	0	0	0	1	4	1	0	0	12	0	8	0	0	2	0	13	1	4	0	2	2	10	0	5	2	1	3	19	0	0	0	0	0	0	2	0	0	0
6	0.1.22.2.11.7.12	Negativibacillus	2106	0	0	0	0	0	0	0	0	0	0	0	0	0	0	0	0	0	0	0	0	0	0	0	0	0	0	1	0	0	0	0	0	0	0	0	0	2	0	0	0	2	0	0	0	0	0
6	0.1.22.2.11.7.13	Paludicola	546	0	0	0	0	0	0	0	0	0	0	0	0	0	0	0	0	9	0	0	0	0	0	0	0	0	0	0	0	0	0	0	0	1	0	0	0	2	0	0	0	1	0	0	0	0	0
6	0.1.22.2.11.7.14	Phocea	97	0	0	0	0	0	0	0	0	0	2	0	0	1	0	1	1	0	0	0	0	1	1	2	0	0	1	0	0	0	4	0	0	0	0	0	0	0	0	0	0	0	0	0	0	0	0
6	0.1.22.2.11.7.15	Pygmaiobacter	2598	0	0	0	0	0	0	0	0	0	0	0	0	0	1	0	0	0	0	0	1	0	0	0	0	0	0	1	0	0	1	0	0	2	0	3	0	0	11	0	4	0	0	0	1	0	0
6	0.1.22.2.11.7.16	Ruminococcaceae_ge	7902	16	0	0	0	76	75	45	98	0	13	0	4	95	10	3	18	392	0	54	37	85	187	14	214	64	177	86	208	82	349	0	260	275	446	52	253	4	0	0	1	0	0	0	4	1	0
6	0.1.22.2.11.7.17	Ruminococcaceae_unclassified	9458	35	0	1	0	39	55	33	51	0	32	0	26	21	24	38	51	134	0	58	48	34	58	90	44	102	142	133	144	85	170	0	50	67	58	36	110	5	8	0	10	6	0	21	1	3	17
6	0.1.22.2.11.7.18	Ruminococcus	36053	159	0	1	3	198	269	86	261	0	281	0	124	209	120	475	346	941	0	474	201	258	388	506	602	728	308	370	1061	1162	1614	1	568	367	1148	410	967	1	4	0	0	25	0	10	0	1	8
6	0.1.22.2.11.7.19	Subdoligranulum	8	0	0	0	0	0	0	0	0	0	0	0	0	0	0	0	0	0	0	0	0	0	0	0	0	0	0	0	0	0	0	0	0	0	0	0	0	0	0	0	0	0	0	0	0	0	0
6	0.1.22.2.11.7.20	UBA1819	84	0	0	0	0	0	0	0	0	0	0	0	0	0	0	0	0	0	0	0	0	0	0	0	0	0	0	0	0	0	0	0	0	0	0	0	0	0	0	0	1	0	0	0	0	0	0
6	0.1.22.2.11.7.21	UCG-001	1773	14	0	0	0	50	3	2	1	0	35	0	7	3	4	30	108	146	0	10	1	39	214	3	59	9	18	1	29	32	88	0	18	6	7	2	1	0	0	0	0	0	0	1	0	0	0
6	0.1.22.2.11.7.22	uncultured	8046	9	0	0	0	57	19	5	118	0	16	0	4	18	18	33	42	42	0	11	39	25	80	75	14	20	63	45	44	79	70	0	56	45	42	23	17	0	0	0	0	1	0	1	0	0	3
5	0.1.22.2.11.8	UCG-010	91808	81	0	1	1	263	215	62	490	0	98	0	41	124	135	319	106	326	0	248	132	111	164	175	121	315	197	230	348	642	196	0	397	215	209	120	290	30	19	0	21	6	0	28	0	4	33
6	0.1.22.2.11.8.1	UCG-010_ge	91808	81	0	1	1	263	215	62	490	0	98	0	41	124	135	319	106	326	0	248	132	111	164	175	121	315	197	230	348	642	196	0	397	215	209	120	290	30	19	0	21	6	0	28	0	4	33
5	0.1.22.2.11.9	UCG-011	894	1	0	0	0	0	0	0	1	0	2	0	0	0	1	1	2	3	0	1	0	0	0	1	0	2	1	2	5	5	5	0	3	0	2	0	2	0	0	0	2	0	0	1	0	0	0
6	0.1.22.2.11.9.1	UCG-011_ge	894	1	0	0	0	0	0	0	1	0	2	0	0	0	1	1	2	3	0	1	0	0	0	1	0	2	1	2	5	5	5	0	3	0	2	0	2	0	0	0	2	0	0	1	0	0	0
5	0.1.22.2.11.10	uncultured	475	4	0	0	0	3	2	2	2	0	4	0	1	3	2	1	1	23	0	9	4	6	7	7	5	2	3	0	7	4	14	0	8	29	7	2	7	0	0	0	3	0	0	0	0	0	0
6	0.1.22.2.11.10.1	uncultured_ge	475	4	0	0	0	3	2	2	2	0	4	0	1	3	2	1	1	23	0	9	4	6	7	7	5	2	3	0	7	4	14	0	8	29	7	2	7	0	0	0	3	0	0	0	0	0	0
4	0.1.22.2.12	Peptococcales	5570	0	0	0	0	0	3	2	3	0	1	0	0	0	0	2	1	6	0	2	3	2	12	7	5	1	0	7	8	7	9	0	6	4	5	14	2	0	1	0	0	0	0	0	0	0	0
5	0.1.22.2.12.1	Peptococcaceae	5570	0	0	0	0	0	3	2	3	0	1	0	0	0	0	2	1	6	0	2	3	2	12	7	5	1	0	7	8	7	9	0	6	4	5	14	2	0	1	0	0	0	0	0	0	0	0
6	0.1.22.2.12.1.1	Dehalobacterium	9	0	0	0	0	0	0	0	0	0	0	0	0	0	0	0	0	0	0	0	0	0	0	0	0	0	0	0	0	0	0	0	0	0	0	0	0	0	0	0	0	0	0	0	0	0	0
6	0.1.22.2.12.1.2	Desulfitispora	1	0	0	0	0	0	0	0	0	0	0	0	0	0	0	0	0	0	0	0	0	0	0	0	0	0	0	0	1	0	0	0	0	0	0	0	0	0	0	0	0	0	0	0	0	0	0
6	0.1.22.2.12.1.3	Desulfonispora	5	0	0	0	0	0	0	0	0	0	0	0	0	0	0	0	0	0	0	0	0	0	0	0	0	0	0	0	0	0	0	0	0	0	0	0	0	0	0	0	0	0	0	0	0	0	0
6	0.1.22.2.12.1.4	Peptococcaceae_ge	12	0	0	0	0	0	0	0	0	0	0	0	0	0	0	0	0	0	0	0	0	0	0	1	0	0	0	0	0	0	0	0	0	0	0	0	0	0	0	0	0	0	0	0	0	0	0
6	0.1.22.2.12.1.5	Peptococcaceae_unclassified	130	0	0	0	0	0	0	0	0	0	0	0	0	0	0	0	0	0	0	0	0	0	0	0	0	0	0	0	0	2	0	0	0	0	0	0	0	0	0	0	0	0	0	0	0	0	0
6	0.1.22.2.12.1.6	Peptococcus	2	0	0	0	0	0	0	0	0	0	0	0	0	0	0	0	0	0	0	0	0	0	0	0	0	0	0	0	0	0	0	0	0	0	0	0	0	0	0	0	0	0	0	0	0	0	0
6	0.1.22.2.12.1.7	uncultured	5411	0	0	0	0	0	3	2	3	0	1	0	0	0	0	2	1	6	0	2	3	2	12	6	5	1	0	7	7	5	9	0	6	4	5	14	2	0	1	0	0	0	0	0	0	0	0
4	0.1.22.2.13	Peptostreptococcales-Tissierellales	20468	76	0	0	0	60	70	86	82	0	81	0	25	94	129	171	84	308	0	339	192	266	214	193	512	177	282	132	370	187	400	0	963	196	335	105	265	10	20	0	9	18	0	3	4	10	15
5	0.1.22.2.13.1	Anaerovoracaceae	18519	74	0	0	0	56	68	85	81	0	75	0	23	94	127	169	81	307	0	332	191	264	212	191	506	171	278	129	363	181	394	0	947	194	328	102	259	5	1	0	0	18	0	3	1	5	7
6	0.1.22.2.13.1.1	Amnipila	10	0	0	0	0	0	0	0	0	0	0	0	0	0	0	0	0	0	0	1	0	0	0	0	0	0	0	0	0	0	0	0	0	0	0	0	0	0	0	0	0	0	0	0	0	0	0
6	0.1.22.2.13.1.2	Anaerovoracaceae_ge	3401	3	0	0	0	5	2	8	2	0	4	0	1	2	1	7	18	21	0	26	9	28	22	37	39	12	3	13	24	17	43	0	62	16	25	9	12	1	0	0	0	5	0	2	1	1	0
6	0.1.22.2.13.1.3	Anaerovoracaceae_unclassified	2253	2	0	0	0	5	15	23	5	0	5	0	1	10	5	6	11	31	0	73	33	44	22	32	226	22	11	12	90	28	75	0	177	50	136	4	47	3	0	0	0	0	0	0	0	0	1
6	0.1.22.2.13.1.4	Anaerovorax	2975	31	0	0	0	37	9	31	37	0	36	0	8	47	103	54	14	126	0	60	77	26	109	57	32	42	53	20	41	64	84	0	123	29	71	17	69	0	1	0	0	1	0	1	0	1	0
6	0.1.22.2.13.1.5	Family_XIII_AD3011_group	7654	26	0	0	0	4	29	10	35	0	18	0	4	25	16	88	23	87	0	133	56	151	21	49	133	84	193	67	146	44	79	0	346	56	50	37	90	1	0	0	0	3	0	0	0	0	5
6	0.1.22.2.13.1.6	Family_XIII_UCG-001	544	1	0	0	0	0	2	0	0	0	1	0	2	1	0	0	0	3	0	6	1	0	17	0	32	5	2	1	6	2	16	0	25	4	4	0	8	0	0	0	0	1	0	0	0	0	1
6	0.1.22.2.13.1.7	Mogibacterium	1615	11	0	0	0	5	11	13	2	0	11	0	7	9	2	14	15	39	0	33	14	15	21	16	44	6	16	16	56	26	97	0	214	39	42	35	33	0	0	0	0	8	0	0	0	3	0
6	0.1.22.2.13.1.8	S5-A14a	48	0	0	0	0	0	0	0	0	0	0	0	0	0	0	0	0	0	0	0	1	0	0	0	0	0	0	0	0	0	0	0	0	0	0	0	0	0	0	0	0	0	0	0	0	0	0
6	0.1.22.2.13.1.9	uncultured	19	0	0	0	0	0	0	0	0	0	0	0	0	0	0	0	0	0	0	0	0	0	0	0	0	0	0	0	0	0	0	0	0	0	0	0	0	0	0	0	0	0	0	0	0	0	0
5	0.1.22.2.13.2	Family_XI	1255	0	0	0	0	0	0	0	0	0	1	0	0	0	0	2	2	0	0	3	0	0	0	0	1	0	0	0	0	0	0	0	0	0	0	2	0	3	19	0	9	0	0	0	3	5	8
6	0.1.22.2.13.2.1	Anaerococcus	362	0	0	0	0	0	0	0	0	0	0	0	0	0	0	0	2	0	0	0	0	0	0	0	0	0	0	0	0	0	0	0	0	0	0	0	0	0	0	0	0	0	0	0	0	0	0
6	0.1.22.2.13.2.2	Family_XI_ge	3	0	0	0	0	0	0	0	0	0	0	0	0	0	0	0	0	0	0	0	0	0	0	0	0	0	0	0	0	0	0	0	0	0	0	0	0	0	0	0	0	0	0	0	0	0	0
6	0.1.22.2.13.2.3	Family_XI_unclassified	53	0	0	0	0	0	0	0	0	0	1	0	0	0	0	0	0	0	0	0	0	0	0	0	0	0	0	0	0	0	0	0	0	0	0	0	0	0	1	0	0	0	0	0	0	1	0
6	0.1.22.2.13.2.4	Fenollaria	20	0	0	0	0	0	0	0	0	0	0	0	0	0	0	0	0	0	0	0	0	0	0	0	0	0	0	0	0	0	0	0	0	0	0	0	0	0	0	0	1	0	0	0	0	0	0
6	0.1.22.2.13.2.5	Finegoldia	134	0	0	0	0	0	0	0	0	0	0	0	0	0	0	0	0	0	0	0	0	0	0	0	0	0	0	0	0	0	0	0	0	0	0	0	0	0	0	0	0	0	0	0	0	0	0
6	0.1.22.2.13.2.6	Peptoniphilus	15	0	0	0	0	0	0	0	0	0	0	0	0	0	0	0	0	0	0	0	0	0	0	0	0	0	0	0	0	0	0	0	0	0	0	0	0	0	0	0	0	0	0	0	0	0	0
6	0.1.22.2.13.2.7	Tepidimicrobium	664	0	0	0	0	0	0	0	0	0	0	0	0	0	0	2	0	0	0	3	0	0	0	0	1	0	0	0	0	0	0	0	0	0	0	2	0	3	18	0	8	0	0	0	3	3	8
6	0.1.22.2.13.2.8	W5053	4	0	0	0	0	0	0	0	0	0	0	0	0	0	0	0	0	0	0	0	0	0	0	0	0	0	0	0	0	0	0	0	0	0	0	0	0	0	0	0	0	0	0	0	0	1	0
5	0.1.22.2.13.3	Peptostreptococcaceae	127	0	0	0	0	0	0	0	0	0	0	0	0	0	0	0	0	0	0	1	0	0	0	0	0	0	0	0	0	0	0	0	0	0	0	0	0	0	0	0	0	0	0	0	0	0	0
6	0.1.22.2.13.3.1	Clostridioides	14	0	0	0	0	0	0	0	0	0	0	0	0	0	0	0	0	0	0	0	0	0	0	0	0	0	0	0	0	0	0	0	0	0	0	0	0	0	0	0	0	0	0	0	0	0	0
6	0.1.22.2.13.3.2	Intestinibacter	18	0	0	0	0	0	0	0	0	0	0	0	0	0	0	0	0	0	0	0	0	0	0	0	0	0	0	0	0	0	0	0	0	0	0	0	0	0	0	0	0	0	0	0	0	0	0
6	0.1.22.2.13.3.3	Paeniclostridium	4	0	0	0	0	0	0	0	0	0	0	0	0	0	0	0	0	0	0	1	0	0	0	0	0	0	0	0	0	0	0	0	0	0	0	0	0	0	0	0	0	0	0	0	0	0	0
6	0.1.22.2.13.3.4	Peptostreptococcaceae_unclassified	8	0	0	0	0	0	0	0	0	0	0	0	0	0	0	0	0	0	0	0	0	0	0	0	0	0	0	0	0	0	0	0	0	0	0	0	0	0	0	0	0	0	0	0	0	0	0
6	0.1.22.2.13.3.5	Peptostreptococcus	8	0	0	0	0	0	0	0	0	0	0	0	0	0	0	0	0	0	0	0	0	0	0	0	0	0	0	0	0	0	0	0	0	0	0	0	0	0	0	0	0	0	0	0	0	0	0
6	0.1.22.2.13.3.6	Romboutsia	28	0	0	0	0	0	0	0	0	0	0	0	0	0	0	0	0	0	0	0	0	0	0	0	0	0	0	0	0	0	0	0	0	0	0	0	0	0	0	0	0	0	0	0	0	0	0
6	0.1.22.2.13.3.7	Sporacetigenium	44	0	0	0	0	0	0	0	0	0	0	0	0	0	0	0	0	0	0	0	0	0	0	0	0	0	0	0	0	0	0	0	0	0	0	0	0	0	0	0	0	0	0	0	0	0	0
6	0.1.22.2.13.3.8	Terrisporobacter	3	0	0	0	0	0	0	0	0	0	0	0	0	0	0	0	0	0	0	0	0	0	0	0	0	0	0	0	0	0	0	0	0	0	0	0	0	0	0	0	0	0	0	0	0	0	0
5	0.1.22.2.13.4	Peptostreptococcales-Tissierellales_fa	3	0	0	0	0	0	1	0	0	0	0	0	1	0	0	0	0	0	0	0	0	0	0	0	0	0	0	0	0	0	0	0	0	0	0	0	0	0	0	0	0	0	0	0	0	0	0
6	0.1.22.2.13.4.1	Peptostreptococcales-Tissierellales_fa_unclassified	3	0	0	0	0	0	1	0	0	0	0	0	1	0	0	0	0	0	0	0	0	0	0	0	0	0	0	0	0	0	0	0	0	0	0	0	0	0	0	0	0	0	0	0	0	0	0
5	0.1.22.2.13.5	Peptostreptococcales-Tissierellales_unclassified	563	2	0	0	0	4	1	1	1	0	5	0	1	0	2	0	1	1	0	3	1	2	2	2	5	6	4	3	7	6	6	0	16	2	7	1	6	2	0	0	0	0	0	0	0	0	0
6	0.1.22.2.13.5.1	Peptostreptococcales-Tissierellales_unclassified	563	2	0	0	0	4	1	1	1	0	5	0	1	0	2	0	1	1	0	3	1	2	2	2	5	6	4	3	7	6	6	0	16	2	7	1	6	2	0	0	0	0	0	0	0	0	0
5	0.1.22.2.13.6	Thermotaleaceae	1	0	0	0	0	0	0	0	0	0	0	0	0	0	0	0	0	0	0	0	0	0	0	0	0	0	0	0	0	0	0	0	0	0	0	0	0	0	0	0	0	0	0	0	0	0	0
6	0.1.22.2.13.6.1	uncultured	1	0	0	0	0	0	0	0	0	0	0	0	0	0	0	0	0	0	0	0	0	0	0	0	0	0	0	0	0	0	0	0	0	0	0	0	0	0	0	0	0	0	0	0	0	0	0
4	0.1.22.2.14	uncultured	1651	3	0	0	0	0	0	0	4	0	1	0	0	5	0	0	0	1	0	0	2	0	1	10	0	2	2	1	0	14	2	0	0	2	0	1	1	0	0	0	0	0	0	0	0	0	0
5	0.1.22.2.14.1	uncultured_fa	1651	3	0	0	0	0	0	0	4	0	1	0	0	5	0	0	0	1	0	0	2	0	1	10	0	2	2	1	0	14	2	0	0	2	0	1	1	0	0	0	0	0	0	0	0	0	0
6	0.1.22.2.14.1.1	uncultured_ge	1651	3	0	0	0	0	0	0	4	0	1	0	0	5	0	0	0	1	0	0	2	0	1	10	0	2	2	1	0	14	2	0	0	2	0	1	1	0	0	0	0	0	0	0	0	0	0
3	0.1.22.3	Desulfitobacteriia	4	0	0	0	0	0	0	0	0	0	0	0	0	0	0	0	0	0	0	0	0	0	0	0	0	0	0	0	0	0	0	0	0	0	0	0	0	0	0	0	0	0	0	0	0	0	0
4	0.1.22.3.1	Desulfitobacteriales	4	0	0	0	0	0	0	0	0	0	0	0	0	0	0	0	0	0	0	0	0	0	0	0	0	0	0	0	0	0	0	0	0	0	0	0	0	0	0	0	0	0	0	0	0	0	0
5	0.1.22.3.1.1	Desulfitobacteriales_unclassified	1	0	0	0	0	0	0	0	0	0	0	0	0	0	0	0	0	0	0	0	0	0	0	0	0	0	0	0	0	0	0	0	0	0	0	0	0	0	0	0	0	0	0	0	0	0	0
6	0.1.22.3.1.1.1	Desulfitobacteriales_unclassified	1	0	0	0	0	0	0	0	0	0	0	0	0	0	0	0	0	0	0	0	0	0	0	0	0	0	0	0	0	0	0	0	0	0	0	0	0	0	0	0	0	0	0	0	0	0	0
5	0.1.22.3.1.2	Heliobacteriaceae	2	0	0	0	0	0	0	0	0	0	0	0	0	0	0	0	0	0	0	0	0	0	0	0	0	0	0	0	0	0	0	0	0	0	0	0	0	0	0	0	0	0	0	0	0	0	0
6	0.1.22.3.1.2.1	Heliorestis	2	0	0	0	0	0	0	0	0	0	0	0	0	0	0	0	0	0	0	0	0	0	0	0	0	0	0	0	0	0	0	0	0	0	0	0	0	0	0	0	0	0	0	0	0	0	0
5	0.1.22.3.1.3	Syntrophobotulaceae	1	0	0	0	0	0	0	0	0	0	0	0	0	0	0	0	0	0	0	0	0	0	0	0	0	0	0	0	0	0	0	0	0	0	0	0	0	0	0	0	0	0	0	0	0	0	0
6	0.1.22.3.1.3.1	Syntrophobotulaceae_unclassified	1	0	0	0	0	0	0	0	0	0	0	0	0	0	0	0	0	0	0	0	0	0	0	0	0	0	0	0	0	0	0	0	0	0	0	0	0	0	0	0	0	0	0	0	0	0	0
3	0.1.22.4	Desulfotomaculia	611	0	0	0	0	0	0	0	1	0	0	0	0	0	0	0	1	0	0	0	0	0	0	0	0	0	0	0	0	0	0	0	0	1	0	0	0	0	16	0	2	0	0	7	1	1	2
4	0.1.22.4.1	Ammonifexales	1	0	0	0	0	0	0	0	0	0	0	0	0	0	0	0	0	0	0	0	0	0	0	0	0	0	0	0	0	0	0	0	0	0	0	0	0	0	0	0	0	0	0	0	0	0	0
5	0.1.22.4.1.1	Ammonifexales_fa	1	0	0	0	0	0	0	0	0	0	0	0	0	0	0	0	0	0	0	0	0	0	0	0	0	0	0	0	0	0	0	0	0	0	0	0	0	0	0	0	0	0	0	0	0	0	0
6	0.1.22.4.1.1.1	Ammonifexales_ge	1	0	0	0	0	0	0	0	0	0	0	0	0	0	0	0	0	0	0	0	0	0	0	0	0	0	0	0	0	0	0	0	0	0	0	0	0	0	0	0	0	0	0	0	0	0	0
4	0.1.22.4.2	Desulfotomaculales	608	0	0	0	0	0	0	0	1	0	0	0	0	0	0	0	1	0	0	0	0	0	0	0	0	0	0	0	0	0	0	0	0	1	0	0	0	0	16	0	2	0	0	7	1	1	2
5	0.1.22.4.2.1	Desulfotomaculales_unclassified	6	0	0	0	0	0	0	0	0	0	0	0	0	0	0	0	0	0	0	0	0	0	0	0	0	0	0	0	0	0	0	0	0	0	0	0	0	0	0	0	0	0	0	0	0	0	0
6	0.1.22.4.2.1.1	Desulfotomaculales_unclassified	6	0	0	0	0	0	0	0	0	0	0	0	0	0	0	0	0	0	0	0	0	0	0	0	0	0	0	0	0	0	0	0	0	0	0	0	0	0	0	0	0	0	0	0	0	0	0
5	0.1.22.4.2.2	Desulfurisporaceae	12	0	0	0	0	0	0	0	0	0	0	0	0	0	0	0	0	0	0	0	0	0	0	0	0	0	0	0	0	0	0	0	0	0	0	0	0	0	0	0	0	0	0	0	0	0	0
6	0.1.22.4.2.2.1	Desulfofundulus	11	0	0	0	0	0	0	0	0	0	0	0	0	0	0	0	0	0	0	0	0	0	0	0	0	0	0	0	0	0	0	0	0	0	0	0	0	0	0	0	0	0	0	0	0	0	0
6	0.1.22.4.2.2.2	Desulfurisporaceae_unclassified	1	0	0	0	0	0	0	0	0	0	0	0	0	0	0	0	0	0	0	0	0	0	0	0	0	0	0	0	0	0	0	0	0	0	0	0	0	0	0	0	0	0	0	0	0	0	0
5	0.1.22.4.2.3	Pelotomaculaceae	590	0	0	0	0	0	0	0	1	0	0	0	0	0	0	0	1	0	0	0	0	0	0	0	0	0	0	0	0	0	0	0	0	1	0	0	0	0	16	0	2	0	0	7	1	1	2
6	0.1.22.4.2.3.1	Cryptanaerobacter	4	0	0	0	0	0	0	0	0	0	0	0	0	0	0	0	0	0	0	0	0	0	0	0	0	0	0	0	0	0	0	0	0	0	0	0	0	0	0	0	0	0	0	0	0	0	0
6	0.1.22.4.2.3.2	Pelotomaculaceae_unclassified	18	0	0	0	0	0	0	0	0	0	0	0	0	0	0	0	0	0	0	0	0	0	0	0	0	0	0	0	0	0	0	0	0	0	0	0	0	0	0	0	0	0	0	0	0	0	0
6	0.1.22.4.2.3.3	Pelotomaculum	568	0	0	0	0	0	0	0	1	0	0	0	0	0	0	0	1	0	0	0	0	0	0	0	0	0	0	0	0	0	0	0	0	1	0	0	0	0	16	0	2	0	0	7	1	1	2
4	0.1.22.4.3	Desulfotomaculia_unclassified	2	0	0	0	0	0	0	0	0	0	0	0	0	0	0	0	0	0	0	0	0	0	0	0	0	0	0	0	0	0	0	0	0	0	0	0	0	0	0	0	0	0	0	0	0	0	0
5	0.1.22.4.3.1	Desulfotomaculia_unclassified	2	0	0	0	0	0	0	0	0	0	0	0	0	0	0	0	0	0	0	0	0	0	0	0	0	0	0	0	0	0	0	0	0	0	0	0	0	0	0	0	0	0	0	0	0	0	0
6	0.1.22.4.3.1.1	Desulfotomaculia_unclassified	2	0	0	0	0	0	0	0	0	0	0	0	0	0	0	0	0	0	0	0	0	0	0	0	0	0	0	0	0	0	0	0	0	0	0	0	0	0	0	0	0	0	0	0	0	0	0
3	0.1.22.5	Firmicutes_unclassified	16662	44	0	1	1	49	112	34	112	0	63	0	36	36	33	58	67	162	0	105	44	48	53	95	86	125	122	124	267	68	201	0	151	115	72	32	145	45	36	0	40	9	0	28	19	4	37
4	0.1.22.5.1	Firmicutes_unclassified	16662	44	0	1	1	49	112	34	112	0	63	0	36	36	33	58	67	162	0	105	44	48	53	95	86	125	122	124	267	68	201	0	151	115	72	32	145	45	36	0	40	9	0	28	19	4	37
5	0.1.22.5.1.1	Firmicutes_unclassified	16662	44	0	1	1	49	112	34	112	0	63	0	36	36	33	58	67	162	0	105	44	48	53	95	86	125	122	124	267	68	201	0	151	115	72	32	145	45	36	0	40	9	0	28	19	4	37
6	0.1.22.5.1.1.1	Firmicutes_unclassified	16662	44	0	1	1	49	112	34	112	0	63	0	36	36	33	58	67	162	0	105	44	48	53	95	86	125	122	124	267	68	201	0	151	115	72	32	145	45	36	0	40	9	0	28	19	4	37
3	0.1.22.6	Incertae_Sedis	200	0	0	0	0	1	0	0	1	0	0	0	0	0	0	0	0	0	0	0	0	0	0	0	0	0	1	0	0	0	10	0	0	2	0	1	0	0	0	0	0	0	0	0	0	0	0
4	0.1.22.6.1	DTU014	198	0	0	0	0	1	0	0	0	0	0	0	0	0	0	0	0	0	0	0	0	0	0	0	0	0	1	0	0	0	10	0	0	2	0	1	0	0	0	0	0	0	0	0	0	0	0
5	0.1.22.6.1.1	DTU014_fa	198	0	0	0	0	1	0	0	0	0	0	0	0	0	0	0	0	0	0	0	0	0	0	0	0	0	1	0	0	0	10	0	0	2	0	1	0	0	0	0	0	0	0	0	0	0	0
6	0.1.22.6.1.1.1	DTU014_ge	198	0	0	0	0	1	0	0	0	0	0	0	0	0	0	0	0	0	0	0	0	0	0	0	0	0	1	0	0	0	10	0	0	2	0	1	0	0	0	0	0	0	0	0	0	0	0
4	0.1.22.6.2	Incertae_Sedis_unclassified	1	0	0	0	0	0	0	0	1	0	0	0	0	0	0	0	0	0	0	0	0	0	0	0	0	0	0	0	0	0	0	0	0	0	0	0	0	0	0	0	0	0	0	0	0	0	0
5	0.1.22.6.2.1	Incertae_Sedis_unclassified	1	0	0	0	0	0	0	0	1	0	0	0	0	0	0	0	0	0	0	0	0	0	0	0	0	0	0	0	0	0	0	0	0	0	0	0	0	0	0	0	0	0	0	0	0	0	0
6	0.1.22.6.2.1.1	Incertae_Sedis_unclassified	1	0	0	0	0	0	0	0	1	0	0	0	0	0	0	0	0	0	0	0	0	0	0	0	0	0	0	0	0	0	0	0	0	0	0	0	0	0	0	0	0	0	0	0	0	0	0
4	0.1.22.6.3	Thermolithobacterales	1	0	0	0	0	0	0	0	0	0	0	0	0	0	0	0	0	0	0	0	0	0	0	0	0	0	0	0	0	0	0	0	0	0	0	0	0	0	0	0	0	0	0	0	0	0	0
5	0.1.22.6.3.1	Thermolithobacteraceae	1	0	0	0	0	0	0	0	0	0	0	0	0	0	0	0	0	0	0	0	0	0	0	0	0	0	0	0	0	0	0	0	0	0	0	0	0	0	0	0	0	0	0	0	0	0	0
6	0.1.22.6.3.1.1	Thermolithobacter	1	0	0	0	0	0	0	0	0	0	0	0	0	0	0	0	0	0	0	0	0	0	0	0	0	0	0	0	0	0	0	0	0	0	0	0	0	0	0	0	0	0	0	0	0	0	0
3	0.1.22.7	Limnochordia	64	0	0	0	0	0	2	0	0	0	0	0	0	0	0	0	0	3	0	0	0	1	0	0	0	0	2	0	0	0	0	0	0	1	1	0	3	0	0	0	0	0	0	0	1	0	0
4	0.1.22.7.1	B55-F-B-G02	36	0	0	0	0	0	2	0	0	0	0	0	0	0	0	0	0	3	0	0	0	1	0	0	0	0	2	0	0	0	0	0	0	1	1	0	3	0	0	0	0	0	0	0	0	0	0
5	0.1.22.7.1.1	B55-F-B-G02_fa	36	0	0	0	0	0	2	0	0	0	0	0	0	0	0	0	0	3	0	0	0	1	0	0	0	0	2	0	0	0	0	0	0	1	1	0	3	0	0	0	0	0	0	0	0	0	0
6	0.1.22.7.1.1.1	B55-F-B-G02_ge	36	0	0	0	0	0	2	0	0	0	0	0	0	0	0	0	0	3	0	0	0	1	0	0	0	0	2	0	0	0	0	0	0	1	1	0	3	0	0	0	0	0	0	0	0	0	0
4	0.1.22.7.2	Limnochordia_or	28	0	0	0	0	0	0	0	0	0	0	0	0	0	0	0	0	0	0	0	0	0	0	0	0	0	0	0	0	0	0	0	0	0	0	0	0	0	0	0	0	0	0	0	1	0	0
5	0.1.22.7.2.1	Limnochordia_fa	28	0	0	0	0	0	0	0	0	0	0	0	0	0	0	0	0	0	0	0	0	0	0	0	0	0	0	0	0	0	0	0	0	0	0	0	0	0	0	0	0	0	0	0	1	0	0
6	0.1.22.7.2.1.1	Hydrogenispora	28	0	0	0	0	0	0	0	0	0	0	0	0	0	0	0	0	0	0	0	0	0	0	0	0	0	0	0	0	0	0	0	0	0	0	0	0	0	0	0	0	0	0	0	1	0	0
3	0.1.22.8	Negativicutes	20018	149	0	1	0	114	74	102	71	0	47	0	47	66	84	74	99	802	0	257	87	94	74	85	1153	301	114	404	1070	205	269	0	261	157	252	47	74	2	23	0	14	5	0	9	3	2	17
4	0.1.22.8.1	Acidaminococcales	9426	59	0	0	0	39	44	41	60	0	21	0	30	44	76	55	62	132	0	80	70	47	54	60	449	197	41	56	80	163	116	0	85	121	56	39	43	0	9	0	10	0	0	7	2	1	9
5	0.1.22.8.1.1	Acidaminococcaceae	9426	59	0	0	0	39	44	41	60	0	21	0	30	44	76	55	62	132	0	80	70	47	54	60	449	197	41	56	80	163	116	0	85	121	56	39	43	0	9	0	10	0	0	7	2	1	9
6	0.1.22.8.1.1.1	Acidaminococcaceae_unclassified	1550	4	0	0	0	1	6	0	5	0	1	0	0	1	1	6	5	5	0	7	2	2	1	0	19	4	5	1	2	9	11	0	5	8	3	10	4	0	3	0	2	0	0	2	1	0	0
6	0.1.22.8.1.1.2	Acidaminococcus	23	0	0	0	0	0	0	0	0	0	0	0	0	0	0	0	0	0	0	0	0	0	0	0	0	0	0	0	0	0	0	0	0	0	0	0	0	0	0	0	0	0	0	0	0	0	0
6	0.1.22.8.1.1.3	Phascolarctobacterium	296	0	0	0	0	0	0	0	0	0	0	0	0	0	0	0	0	0	0	0	0	0	0	0	0	0	0	0	0	0	0	0	0	0	0	0	0	0	0	0	0	0	0	0	0	0	0
6	0.1.22.8.1.1.4	Succiniclasticum	7489	55	0	0	0	36	36	40	53	0	20	0	28	43	74	49	57	127	0	72	68	45	53	59	430	193	36	55	78	152	102	0	77	112	53	29	38	0	5	0	8	0	0	5	1	1	9
6	0.1.22.8.1.1.5	Succinispira	7	0	0	0	0	1	0	0	0	0	0	0	0	0	0	0	0	0	0	0	0	0	0	1	0	0	0	0	0	1	0	0	0	0	0	0	0	0	0	0	0	0	0	0	0	0	0
6	0.1.22.8.1.1.6	uncultured	61	0	0	0	0	1	2	1	2	0	0	0	2	0	1	0	0	0	0	1	0	0	0	0	0	0	0	0	0	1	3	0	3	1	0	0	1	0	1	0	0	0	0	0	0	0	0
4	0.1.22.8.2	Negativicutes_unclassified	223	5	0	0	0	0	3	2	1	0	1	0	0	1	2	0	2	2	0	5	1	1	1	2	3	5	3	2	4	1	6	0	2	4	1	1	1	1	1	0	0	0	0	0	1	0	1
5	0.1.22.8.2.1	Negativicutes_unclassified	223	5	0	0	0	0	3	2	1	0	1	0	0	1	2	0	2	2	0	5	1	1	1	2	3	5	3	2	4	1	6	0	2	4	1	1	1	1	1	0	0	0	0	0	1	0	1
6	0.1.22.8.2.1.1	Negativicutes_unclassified	223	5	0	0	0	0	3	2	1	0	1	0	0	1	2	0	2	2	0	5	1	1	1	2	3	5	3	2	4	1	6	0	2	4	1	1	1	1	1	0	0	0	0	0	1	0	1
4	0.1.22.8.3	Veillonellales-Selenomonadales	10369	85	0	1	0	75	27	59	10	0	25	0	17	21	6	19	35	668	0	172	16	46	19	23	701	99	70	346	986	41	147	0	174	32	195	7	30	1	13	0	4	5	0	2	0	1	7
5	0.1.22.8.3.1	Selenomonadaceae	7987	85	0	1	0	71	25	59	10	0	23	0	15	19	6	19	34	666	0	169	15	45	17	21	687	98	67	338	969	29	145	0	161	32	190	6	27	1	13	0	4	5	0	2	0	0	5
6	0.1.22.8.3.1.1	Anaerovibrio	382	4	0	0	0	3	0	3	2	0	2	0	3	4	1	2	12	4	0	7	1	3	1	0	32	27	5	5	14	3	4	0	29	0	10	2	2	0	0	0	0	0	0	0	0	0	0
6	0.1.22.8.3.1.2	Mitsuokella	11	0	0	0	0	0	0	0	0	0	0	0	0	0	0	0	0	0	0	0	0	0	0	0	4	1	0	0	0	1	0	0	2	0	0	0	0	0	0	0	0	0	0	0	0	0	0
6	0.1.22.8.3.1.3	Pectinatus	43	0	0	0	0	0	1	0	0	0	0	0	0	0	0	0	0	1	0	0	0	0	0	0	1	0	0	0	0	0	1	0	2	0	0	1	0	0	0	0	0	0	0	0	0	0	0
6	0.1.22.8.3.1.4	Quinella	3078	0	0	1	0	0	5	14	1	0	10	0	1	2	1	0	4	622	0	92	9	37	0	4	70	3	2	272	894	4	62	0	24	20	50	2	8	0	1	0	0	4	0	0	0	0	1
6	0.1.22.8.3.1.5	Schwartzia	211	17	0	0	0	0	1	2	0	0	2	0	2	1	1	8	9	8	0	0	0	0	1	0	0	0	0	0	18	0	0	0	0	0	5	0	2	0	0	0	0	0	0	0	0	0	0
6	0.1.22.8.3.1.6	Selenomonadaceae_ge	36	0	0	0	0	1	0	0	0	0	0	0	0	0	0	0	0	0	0	1	0	0	0	1	2	2	0	1	0	0	1	0	1	1	1	0	0	1	0	0	0	0	0	0	0	0	0
6	0.1.22.8.3.1.7	Selenomonadaceae_unclassified	953	8	0	0	0	6	1	6	2	0	3	0	2	1	1	2	0	5	0	12	1	1	3	3	51	5	7	16	3	4	12	0	12	1	12	0	3	0	1	0	0	0	0	1	0	0	4
6	0.1.22.8.3.1.8	Selenomonas	2825	50	0	0	0	57	15	32	4	0	5	0	6	10	2	6	4	19	0	40	1	2	11	13	502	45	24	42	37	10	50	0	85	0	89	1	1	0	1	0	0	1	0	1	0	0	0
6	0.1.22.8.3.1.9	Veillonellaceae_UCG-001	410	6	0	0	0	4	2	1	1	0	1	0	1	1	0	1	5	6	0	16	3	1	1	0	19	15	29	2	3	7	14	0	4	10	12	0	11	0	10	0	4	0	0	0	0	0	0
6	0.1.22.8.3.1.10	uncultured	38	0	0	0	0	0	0	1	0	0	0	0	0	0	0	0	0	1	0	1	0	1	0	0	6	0	0	0	0	0	1	0	2	0	11	0	0	0	0	0	0	0	0	0	0	0	0
5	0.1.22.8.3.2	Sporomusaceae	5	0	0	0	0	0	0	0	0	0	0	0	0	0	0	0	0	0	0	0	0	0	0	0	0	0	0	0	0	0	0	0	0	0	0	0	0	0	0	0	0	0	0	0	0	0	0
6	0.1.22.8.3.2.1	Pelosinus	1	0	0	0	0	0	0	0	0	0	0	0	0	0	0	0	0	0	0	0	0	0	0	0	0	0	0	0	0	0	0	0	0	0	0	0	0	0	0	0	0	0	0	0	0	0	0
6	0.1.22.8.3.2.2	Sporomusa	1	0	0	0	0	0	0	0	0	0	0	0	0	0	0	0	0	0	0	0	0	0	0	0	0	0	0	0	0	0	0	0	0	0	0	0	0	0	0	0	0	0	0	0	0	0	0
6	0.1.22.8.3.2.3	Sporomusaceae_ge	1	0	0	0	0	0	0	0	0	0	0	0	0	0	0	0	0	0	0	0	0	0	0	0	0	0	0	0	0	0	0	0	0	0	0	0	0	0	0	0	0	0	0	0	0	0	0
6	0.1.22.8.3.2.4	Sporomusaceae_unclassified	2	0	0	0	0	0	0	0	0	0	0	0	0	0	0	0	0	0	0	0	0	0	0	0	0	0	0	0	0	0	0	0	0	0	0	0	0	0	0	0	0	0	0	0	0	0	0
5	0.1.22.8.3.3	Veillonellaceae	1228	0	0	0	0	0	0	0	0	0	1	0	0	1	0	0	0	0	0	0	1	0	0	1	1	0	0	0	1	1	0	0	0	0	0	0	0	0	0	0	0	0	0	0	0	1	1
6	0.1.22.8.3.3.1	Anaeroglobus	47	0	0	0	0	0	0	0	0	0	1	0	0	1	0	0	0	0	0	0	1	0	0	0	1	0	0	0	1	1	0	0	0	0	0	0	0	0	0	0	0	0	0	0	0	0	0
6	0.1.22.8.3.3.2	Dialister	2	0	0	0	0	0	0	0	0	0	0	0	0	0	0	0	0	0	0	0	0	0	0	0	0	0	0	0	0	0	0	0	0	0	0	0	0	0	0	0	0	0	0	0	0	0	0
6	0.1.22.8.3.3.3	Megasphaera	158	0	0	0	0	0	0	0	0	0	0	0	0	0	0	0	0	0	0	0	0	0	0	0	0	0	0	0	0	0	0	0	0	0	0	0	0	0	0	0	0	0	0	0	0	0	0
6	0.1.22.8.3.3.4	Negativicoccus	580	0	0	0	0	0	0	0	0	0	0	0	0	0	0	0	0	0	0	0	0	0	0	0	0	0	0	0	0	0	0	0	0	0	0	0	0	0	0	0	0	0	0	0	0	0	1
6	0.1.22.8.3.3.5	Veillonella	359	0	0	0	0	0	0	0	0	0	0	0	0	0	0	0	0	0	0	0	0	0	0	0	0	0	0	0	0	0	0	0	0	0	0	0	0	0	0	0	0	0	0	0	0	0	0
6	0.1.22.8.3.3.6	Veillonellaceae_ge	3	0	0	0	0	0	0	0	0	0	0	0	0	0	0	0	0	0	0	0	0	0	0	0	0	0	0	0	0	0	0	0	0	0	0	0	0	0	0	0	0	0	0	0	0	0	0
6	0.1.22.8.3.3.7	Veillonellaceae_unclassified	79	0	0	0	0	0	0	0	0	0	0	0	0	0	0	0	0	0	0	0	0	0	0	1	0	0	0	0	0	0	0	0	0	0	0	0	0	0	0	0	0	0	0	0	0	1	0
5	0.1.22.8.3.4	Veillonellales-Selenomonadales_unclassified	839	0	0	0	0	4	2	0	0	0	1	0	2	1	0	0	1	2	0	3	0	1	2	1	13	1	3	8	16	11	2	0	13	0	5	1	3	0	0	0	0	0	0	0	0	0	1
6	0.1.22.8.3.4.1	Veillonellales-Selenomonadales_unclassified	839	0	0	0	0	4	2	0	0	0	1	0	2	1	0	0	1	2	0	3	0	1	2	1	13	1	3	8	16	11	2	0	13	0	5	1	3	0	0	0	0	0	0	0	0	0	1
5	0.1.22.8.3.5	uncultured	310	0	0	0	0	0	0	0	0	0	0	0	0	0	0	0	0	0	0	0	0	0	0	0	0	0	0	0	0	0	0	0	0	0	0	0	0	0	0	0	0	0	0	0	0	0	0
6	0.1.22.8.3.5.1	uncultured_ge	310	0	0	0	0	0	0	0	0	0	0	0	0	0	0	0	0	0	0	0	0	0	0	0	0	0	0	0	0	0	0	0	0	0	0	0	0	0	0	0	0	0	0	0	0	0	0
3	0.1.22.9	Symbiobacteriia	2	0	0	0	0	0	0	0	0	0	0	0	0	0	0	0	0	0	0	0	0	0	0	0	0	0	0	0	0	0	0	0	0	0	0	0	0	0	0	0	0	0	0	0	0	0	0
4	0.1.22.9.1	Symbiobacteriales	2	0	0	0	0	0	0	0	0	0	0	0	0	0	0	0	0	0	0	0	0	0	0	0	0	0	0	0	0	0	0	0	0	0	0	0	0	0	0	0	0	0	0	0	0	0	0
5	0.1.22.9.1.1	Symbiobacteraceae	1	0	0	0	0	0	0	0	0	0	0	0	0	0	0	0	0	0	0	0	0	0	0	0	0	0	0	0	0	0	0	0	0	0	0	0	0	0	0	0	0	0	0	0	0	0	0
6	0.1.22.9.1.1.1	uncultured	1	0	0	0	0	0	0	0	0	0	0	0	0	0	0	0	0	0	0	0	0	0	0	0	0	0	0	0	0	0	0	0	0	0	0	0	0	0	0	0	0	0	0	0	0	0	0
5	0.1.22.9.1.2	Symbiobacteriales_fa	1	0	0	0	0	0	0	0	0	0	0	0	0	0	0	0	0	0	0	0	0	0	0	0	0	0	0	0	0	0	0	0	0	0	0	0	0	0	0	0	0	0	0	0	0	0	0
6	0.1.22.9.1.2.1	Caldinitratiruptor	1	0	0	0	0	0	0	0	0	0	0	0	0	0	0	0	0	0	0	0	0	0	0	0	0	0	0	0	0	0	0	0	0	0	0	0	0	0	0	0	0	0	0	0	0	0	0
3	0.1.22.10	Syntrophomonadia	42	0	0	0	0	1	1	0	1	0	0	0	0	2	0	0	0	3	0	0	3	2	0	1	0	0	0	0	0	0	0	0	2	2	2	0	4	0	0	0	0	0	0	0	0	0	0
4	0.1.22.10.1	Syntrophomonadales	42	0	0	0	0	1	1	0	1	0	0	0	0	2	0	0	0	3	0	0	3	2	0	1	0	0	0	0	0	0	0	0	2	2	2	0	4	0	0	0	0	0	0	0	0	0	0
5	0.1.22.10.1.1	Syntrophomonadaceae	42	0	0	0	0	1	1	0	1	0	0	0	0	2	0	0	0	3	0	0	3	2	0	1	0	0	0	0	0	0	0	0	2	2	2	0	4	0	0	0	0	0	0	0	0	0	0
6	0.1.22.10.1.1.1	Pelospora	31	0	0	0	0	1	0	0	1	0	0	0	0	0	0	0	0	3	0	0	3	2	0	1	0	0	0	0	0	0	0	0	2	2	2	0	4	0	0	0	0	0	0	0	0	0	0
6	0.1.22.10.1.1.2	Syntrophomonadaceae_unclassified	10	0	0	0	0	0	1	0	0	0	0	0	0	2	0	0	0	0	0	0	0	0	0	0	0	0	0	0	0	0	0	0	0	0	0	0	0	0	0	0	0	0	0	0	0	0	0
6	0.1.22.10.1.1.3	Thermosyntropha	1	0	0	0	0	0	0	0	0	0	0	0	0	0	0	0	0	0	0	0	0	0	0	0	0	0	0	0	0	0	0	0	0	0	0	0	0	0	0	0	0	0	0	0	0	0	0
3	0.1.22.11	uncultured	2	0	0	0	0	0	0	0	0	0	0	0	0	0	0	0	0	0	0	0	0	0	0	0	0	0	0	0	0	0	0	0	0	0	0	0	0	0	0	0	0	0	0	0	0	0	0
4	0.1.22.11.1	uncultured_or	2	0	0	0	0	0	0	0	0	0	0	0	0	0	0	0	0	0	0	0	0	0	0	0	0	0	0	0	0	0	0	0	0	0	0	0	0	0	0	0	0	0	0	0	0	0	0
5	0.1.22.11.1.1	uncultured_fa	2	0	0	0	0	0	0	0	0	0	0	0	0	0	0	0	0	0	0	0	0	0	0	0	0	0	0	0	0	0	0	0	0	0	0	0	0	0	0	0	0	0	0	0	0	0	0
6	0.1.22.11.1.1.1	uncultured_ge	2	0	0	0	0	0	0	0	0	0	0	0	0	0	0	0	0	0	0	0	0	0	0	0	0	0	0	0	0	0	0	0	0	0	0	0	0	0	0	0	0	0	0	0	0	0	0
2	0.1.23	Fusobacteriota	3041	0	0	0	0	0	0	0	0	0	0	0	0	0	0	0	0	0	0	4	0	0	0	0	1	0	0	0	0	1	1	0	0	0	0	0	0	5	0	0	2	0	0	0	0	0	0
3	0.1.23.1	Fusobacteriia	3041	0	0	0	0	0	0	0	0	0	0	0	0	0	0	0	0	0	0	4	0	0	0	0	1	0	0	0	0	1	1	0	0	0	0	0	0	5	0	0	2	0	0	0	0	0	0
4	0.1.23.1.1	Fusobacteriales	3041	0	0	0	0	0	0	0	0	0	0	0	0	0	0	0	0	0	0	4	0	0	0	0	1	0	0	0	0	1	1	0	0	0	0	0	0	5	0	0	2	0	0	0	0	0	0
5	0.1.23.1.1.1	Fusobacteriaceae	2908	0	0	0	0	0	0	0	0	0	0	0	0	0	0	0	0	0	0	2	0	0	0	0	1	0	0	0	0	1	1	0	0	0	0	0	0	1	0	0	2	0	0	0	0	0	0
6	0.1.23.1.1.1.1	Fusobacteriaceae_ge	45	0	0	0	0	0	0	0	0	0	0	0	0	0	0	0	0	0	0	0	0	0	0	0	0	0	0	0	0	0	0	0	0	0	0	0	0	0	0	0	1	0	0	0	0	0	0
6	0.1.23.1.1.1.2	Fusobacteriaceae_unclassified	138	0	0	0	0	0	0	0	0	0	0	0	0	0	0	0	0	0	0	0	0	0	0	0	0	0	0	0	0	1	0	0	0	0	0	0	0	1	0	0	1	0	0	0	0	0	0
6	0.1.23.1.1.1.3	Fusobacterium	2725	0	0	0	0	0	0	0	0	0	0	0	0	0	0	0	0	0	0	2	0	0	0	0	1	0	0	0	0	0	1	0	0	0	0	0	0	0	0	0	0	0	0	0	0	0	0
5	0.1.23.1.1.2	Fusobacteriales_unclassified	124	0	0	0	0	0	0	0	0	0	0	0	0	0	0	0	0	0	0	0	0	0	0	0	0	0	0	0	0	0	0	0	0	0	0	0	0	4	0	0	0	0	0	0	0	0	0
6	0.1.23.1.1.2.1	Fusobacteriales_unclassified	124	0	0	0	0	0	0	0	0	0	0	0	0	0	0	0	0	0	0	0	0	0	0	0	0	0	0	0	0	0	0	0	0	0	0	0	0	4	0	0	0	0	0	0	0	0	0
5	0.1.23.1.1.3	Leptotrichiaceae	9	0	0	0	0	0	0	0	0	0	0	0	0	0	0	0	0	0	0	2	0	0	0	0	0	0	0	0	0	0	0	0	0	0	0	0	0	0	0	0	0	0	0	0	0	0	0
6	0.1.23.1.1.3.1	Hypnocyclicus	3	0	0	0	0	0	0	0	0	0	0	0	0	0	0	0	0	0	0	0	0	0	0	0	0	0	0	0	0	0	0	0	0	0	0	0	0	0	0	0	0	0	0	0	0	0	0
[truncated: 1,365 more rows]
[truncated: 171 more columns]
