# Supplementary material for: What Metagenomics Reveals of Microbial Populations in a Host-Parasite Relationship Between Alpine Goats and <em>Haemonchus contortus</em>
Source: Preprints.org preprint supplement (doi:10.20944/preprints202312.1796.v1), 2023-12-25
Supplement: Supplementary file 2 [file bFB_ratio.xlsx]

## Sheet: f_B_ratio_all
taxon	F/B	Firmicutes	Bacteroidota
AF_E10_AB_7	0.240033	6478	26988	AF	E10	AB	7
AF_E1_NI_7	0.5	2	4	AF	E1	NI	7
AF_E2_NI_7	0.472222	17	36	AF	E2	NI	7
AF_E3_NI_7	0.546512	47	86	AF	E3	NI	7
AF_E4_IO_7	0.784708	12808	16322	AF	E4	IO	7
AF_E5_IO_7	1.18079	14225	12047	AF	E5	IO	7
AF_E6_ZA_7	0.167917	3536	21058	AF	E6	ZA	7
AF_E7_AB_7	0.269262	12221	45387	AF	E7	AB	7
AF_E8_AB_7	0.125	1	8	AF	E8	AB	7
AF_F10_AB_7	0.250238	5522	22067	AF	F10	AB	7
AF_F1_NI_7	0.25	1	4	AF	F1	NI	7
AF_F2_NI_7	0.393444	3877	9854	AF	F2	NI	7
AF_F3_IO_7	0.257621	5468	21225	AF	F3	IO	7
AF_F5_IO_7	0.138257	5784	41835	AF	F5	IO	7
AF_F6_ZA_7	0.442126	12372	27983	AF	F6	ZA	7
AF_F7_ZA_7	0.19937	5506	27617	AF	F7	ZA	7
AF_F8_ZA_7	0.408604	22729	55626	AF	F8	ZA	7
AF_G10_ZA_21	0	0	1	AF	G10	ZA	21
AF_G1_AB_21	0.395411	8461	21398	AF	G1	AB	21
AF_G2_AB_21	0.508676	6156	12102	AF	G2	AB	21
AF_G3_AB_21	0.502689	7853	15622	AF	G3	AB	21
AF_G4_ZA_21	0.414542	12925	31179	AF	G4	ZA	21
AF_G5_ZA_21	0.502102	9792	19502	AF	G5	ZA	21
AF_G6_IO_21	0.374073	10189	27238	AF	G6	IO	21
AF_G7_AB_21	0.728068	13229	18170	AF	G7	AB	21
AF_G8_IO_21	0.874105	8054	9214	AF	G8	IO	21
AF_H10_NI_21	0.967588	9762	10089	AF	H10	NI	21
AF_H1_IO_21	1.05377	26044	24715	AF	H1	IO	21
AF_H2_ZA_21	0.426484	12432	29150	AF	H2	ZA	21
AF_H3_NI_21	0.541375	28400	52459	AF	H3	NI	21
AF_H4_ZA_21	1.11111	10	9	AF	H4	ZA	21
AF_H5_IO_21	0.941594	20845	22138	AF	H5	IO	21
AF_H6_IO_21	0.601656	9372	15577	AF	H6	IO	21
AF_H7_NI_21	0.374034	11420	30532	AF	H7	NI	21
AF_H8_NI_21	0.598599	6493	10847	AF	H8	NI	21
AF_H9_NI_21	0.704027	15823	22475	AF	H9	NI	21
ALN_E4_IO_7	0.371585	408	1098	ALN	E4	IO	7
ALN_E5_IO_7	0.342657	490	1430	ALN	E5	IO	7
ALN_E9_AB_7	#DIV/0!	0	0	ALN	E9	AB	7
ALN_F10_AB_7	0.205336	431	2099	ALN	F10	AB	7
ALN_F1_NI_7	0.506579	385	760	ALN	F1	NI	7
ALN_F2_NI_7	0	0	2	ALN	F2	NI	7
ALN_F3_IO_7	0.308034	625	2029	ALN	F3	IO	7
ALN_F4_IO_7	0.410127	162	395	ALN	F4	IO	7
ALN_F5_IO_7	0.628272	120	191	ALN	F5	IO	7
ALN_F6_ZA_7	0.339254	573	1689	ALN	F6	ZA	7
ALN_F7_ZA_7	0.376844	332	881	ALN	F7	ZA	7
ALN_F8_ZA_7	0.29212	215	736	ALN	F8	ZA	7
ALN_F9_ZA_7	0.17096	146	854	ALN	F9	ZA	7
ALN_G10_ZA_21	0.33815	819	2422	ALN	G10	ZA	21
ALN_G2_AB_21	0	0	1	ALN	G2	AB	21
ALN_G3_AB_21	#DIV/0!	0	0	ALN	G3	AB	21
ALN_G4_ZA_21	0.342144	233	681	ALN	G4	ZA	21
ALN_G5_ZA_21	1	1	1	ALN	G5	ZA	21
ALN_G6_IO_21	0.228748	148	647	ALN	G6	IO	21
ALN_G8_IO_21	0.345107	469	1359	ALN	G8	IO	21
ALN_G9_AB_21	2	2	1	ALN	G9	AB	21
ALN_H1_IO_21	1.08092	561	519	ALN	H1	IO	21
ALN_H2_ZA_21	2.26948	699	308	ALN	H2	ZA	21
ALN_H3_NI_21	0.350329	426	1216	ALN	H3	NI	21
ALN_H4_ZA_21	0.341108	234	686	ALN	H4	ZA	21
ALN_H5_IO_21	0.457813	586	1280	ALN	H5	IO	21
ALN_H6_IO_21	0.311734	178	571	ALN	H6	IO	21
ALN_H7_NI_21	0.317829	41	129	ALN	H7	NI	21
ALN_H8_NI_21	0.260274	152	584	ALN	H8	NI	21
Abo_A10_AB_7	0.555556	15	27	Abo	A10	AB	7
Abo_A1_NI_7	0.891748	11887	13330	Abo	A1	NI	7
Abo_A2_NI_7	0.515884	12228	23703	Abo	A2	NI	7
Abo_A4_IO_7	1.0472	10471	9999	Abo	A4	IO	7
Abo_A5_IO_7	0.667011	7752	11622	Abo	A5	IO	7
Abo_A6_ZA_7	1.22022	338	277	Abo	A6	ZA	7
Abo_A9_AB_7	1.01754	58	57	Abo	A9	AB	7
Abo_B10_AB_7	0.791159	7266	9184	Abo	B10	AB	7
Abo_B1_NI_7	0.30056	5900	19630	Abo	B1	NI	7
Abo_B2_NI_7	0.622623	7172	11519	Abo	B2	NI	7
Abo_B3_IO_7	0.9369	10646	11363	Abo	B3	IO	7
Abo_B4_IO_7	0.975997	9027	9249	Abo	B4	IO	7
Abo_B5_IO_7	0.469828	11640	24775	Abo	B5	IO	7
Abo_B6_ZA_7	0.98803	7346	7435	Abo	B6	ZA	7
Abo_B7_ZA_7	0.718653	4184	5822	Abo	B7	ZA	7
Abo_B8_ZA_7	0.663148	3581	5400	Abo	B8	ZA	7
Abo_B9_ZA_7	1.35065	312	231	Abo	B9	ZA	7
Abo_C10_ZA_21	0.833333	5	6	Abo	C10	ZA	21
Abo_C1_AB_21	0.238371	2301	9653	Abo	C1	AB	21
Abo_C2_AB_21	1.33333	4	3	Abo	C2	AB	21
Abo_C4_ZA_21	0.532167	6510	12233	Abo	C4	ZA	21
Abo_C5_ZA_21	0	0	1	Abo	C5	ZA	21
Abo_C6_IO_21	0.333333	5	15	Abo	C6	IO	21
Abo_C7_AB_21	0.433594	111	256	Abo	C7	AB	21
Abo_C8_IO_21	0.792903	2324	2931	Abo	C8	IO	21
Abo_C9_AB_21	0.947368	18	19	Abo	C9	AB	21
Abo_D10_NI_21	0.54045	8070	14932	Abo	D10	NI	21
Abo_D1_IO_21	0.168614	202	1198	Abo	D1	IO	21
Abo_D2_ZA_21	0.348344	3419	9815	Abo	D2	ZA	21
Abo_D3_NI_21	0.286016	3111	10877	Abo	D3	NI	21
Abo_D4_ZA_21	1.23529	42	34	Abo	D4	ZA	21
Abo_D5_IO_21	2	6	3	Abo	D5	IO	21
Abo_D6_IO_21	0.571429	36	63	Abo	D6	IO	21
Abo_D9_NI_21	0.823064	4475	5437	Abo	D9	NI	21
Blood_E1_NI_7	1	2	2	Blood	E1	NI	7
Blood_E2_NI_7	0.333333	2	6	Blood	E2	NI	7
Blood_E3_NI_7	0	0	3	Blood	E3	NI	7
Blood_E4_IO_7	0.46875	15	32	Blood	E4	IO	7
Blood_E5_IO_7	2	2	1	Blood	E5	IO	7
Blood_E6_ZA_7	0.2	3	15	Blood	E6	ZA	7
Blood_E7_AB_7	0.4	2	5	Blood	E7	AB	7
Blood_E8_AB_7	0	0	7	Blood	E8	AB	7
Blood_E9_AB_7	0.166667	1	6	Blood	E9	AB	7
Blood_F1_NI_7	0	0	1	Blood	F1	NI	7
Blood_F2_NI_7	0.416667	5	12	Blood	F2	NI	7
Blood_F3_IO_7	#DIV/0!	0	0	Blood	F3	IO	7
Blood_F4_IO_7	0	0	1	Blood	F4	IO	7
Blood_F5_IO_7	0.239183	1570	6564	Blood	F5	IO	7
Blood_F6_ZA_7	1	1	1	Blood	F6	ZA	7
Blood_F7_ZA_7	0.5	1	2	Blood	F7	ZA	7
Blood_F8_ZA_7	0	0	1	Blood	F8	ZA	7
Blood_F9_ZA_7	0.75	6	8	Blood	F9	ZA	7
Blood_G10_ZA_21	0.349262	2083	5964	Blood	G10	ZA	21
Blood_G1_AB_21	0.338768	187	552	Blood	G1	AB	21
Blood_G2_AB_21	0.323061	6447	19956	Blood	G2	AB	21
Blood_G3_AB_21	#DIV/0!	1	0	Blood	G3	AB	21
Blood_G4_ZA_21	0.263734	3831	14526	Blood	G4	ZA	21
Blood_G5_ZA_21	0.266049	3390	12742	Blood	G5	ZA	21
Blood_G6_IO_21	0.229162	2084	9094	Blood	G6	IO	21
Blood_G7_AB_21	0.141821	1564	11028	Blood	G7	AB	21
Blood_G8_IO_21	0.293077	4174	14242	Blood	G8	IO	21
Blood_G9_AB_21	0.313469	1941	6192	Blood	G9	AB	21
Blood_H10_NI_21	0.666667	2	3	Blood	H10	NI	21
Blood_H1_IO_21	0.27	108	400	Blood	H1	IO	21
Blood_H2_ZA_21	0.254888	30699	120441	Blood	H2	ZA	21
Blood_H3_NI_21	0.178885	15509	86698	Blood	H3	NI	21
Blood_H4_ZA_21	#DIV/0!	0	0	Blood	H4	ZA	21
Blood_H5_IO_21	0.131716	76	577	Blood	H5	IO	21
Blood_H6_IO_21	0.314394	3320	10560	Blood	H6	IO	21
Blood_H7_NI_21	0.244747	2050	8376	Blood	H7	NI	21
Blood_H8_NI_21	0.143592	2204	15349	Blood	H8	NI	21
Blood_H9_NI_21	1	5	5	Blood	H9	NI	21
Fec_A10_AB_7	1.41795	10714	7556	Fec	A10	AB	7
Fec_A6_ZA_7	0	0	1	Fec	A6	ZA	7
Fec_A8_AB_7	#DIV/0!	1	0	Fec	A8	AB	7
Fec_A9_AB_7	0	0	1	Fec	A9	AB	7
Fec_B10_AB_7	1.95533	7047	3604	Fec	B10	AB	7
Fec_B1_NI_7	3.49698	169551	48485	Fec	B1	NI	7
Fec_B3_IO_7	2.04153	47492	23263	Fec	B3	IO	7
Fec_B4_IO_7	1.68097	2782	1655	Fec	B4	IO	7
Fec_B5_IO_7	0.931962	21834	23428	Fec	B5	IO	7
Fec_B6_ZA_7	1.66325	11207	6738	Fec	B6	ZA	7
Fec_B7_ZA_7	1.11358	6353	5705	Fec	B7	ZA	7
Fec_B8_ZA_7	2.30836	15436	6687	Fec	B8	ZA	7
Fec_B9_ZA_7	1.45036	70934	48908	Fec	B9	ZA	7
Fec_C10_ZA_21	1.50585	15051	9995	Fec	C10	ZA	21
Fec_C1_AB_21	3.4738	146789	42256	Fec	C1	AB	21
Fec_C2_AB_21	2.40132	3991	1662	Fec	C2	AB	21
Fec_C3_AB_21	0.458256	3436	7498	Fec	C3	AB	21
Fec_C4_ZA_21	1.18022	2744	2325	Fec	C4	ZA	21
Fec_C5_ZA_21	1.39427	3455	2478	Fec	C5	ZA	21
Fec_C6_IO_21	1.9034	1399	735	Fec	C6	IO	21
Fec_C7_AB_21	0.888192	2550	2871	Fec	C7	AB	21
Fec_C8_IO_21	1.9976	4157	2081	Fec	C8	IO	21
Fec_C9_AB_21	#DIV/0!	2	0	Fec	C9	AB	21
Fec_D7_NI_21	1.72005	7668	4458	Fec	D7	NI	21
MLN_A10_AB_7	#DIV/0!	0	0	MLN	A10	AB	7
MLN_A4_IO_7	0.318182	7	22	MLN	A4	IO	7
MLN_A5_IO_7	0.356612	240	673	MLN	A5	IO	7
MLN_B10_AB_7	#DIV/0!	0	0	MLN	B10	AB	7
MLN_B2_NI_7	0	0	1	MLN	B2	NI	7
MLN_B3_IO_7	#DIV/0!	1	0	MLN	B3	IO	7
MLN_B4_IO_7	0	0	1	MLN	B4	IO	7
MLN_B5_IO_7	2	2	1	MLN	B5	IO	7
MLN_B6_ZA_7	0.353741	104	294	MLN	B6	ZA	7
MLN_B7_ZA_7	0.365248	103	282	MLN	B7	ZA	7
MLN_B8_ZA_7	0.371486	185	498	MLN	B8	ZA	7
MLN_B9_ZA_7	0	0	1	MLN	B9	ZA	7
MLN_C10_ZA_21	0.3367	100	297	MLN	C10	ZA	21
MLN_C1_AB_21	0.8	4	5	MLN	C1	AB	21
MLN_C2_AB_21	0.246429	69	280	MLN	C2	AB	21
MLN_C3_AB_21	0.3625	87	240	MLN	C3	AB	21
MLN_C4_ZA_21	0.391304	90	230	MLN	C4	ZA	21
MLN_C5_ZA_21	0.0434783	1	23	MLN	C5	ZA	21
MLN_C6_IO_21	0.393939	260	660	MLN	C6	IO	21
MLN_C7_AB_21	0.315385	41	130	MLN	C7	AB	21
MLN_C8_IO_21	0.697368	53	76	MLN	C8	IO	21
MLN_C9_AB_21	0.322581	40	124	MLN	C9	AB	21
MLN_D2_ZA_21	0.168478	31	184	MLN	D2	ZA	21
MLN_D3_NI_21	0.306122	315	1029	MLN	D3	NI	21
MLN_D4_ZA_21	0.34202	105	307	MLN	D4	ZA	21
MLN_D5_IO_21	0.370787	33	89	MLN	D5	IO	21
MLN_D6_IO_21	0.27476	86	313	MLN	D6	IO	21
RF_A1_NI_7	0.227533	3861	16969	RF	A1	NI	7
RF_B10_AB_7	0.321754	11281	35061	RF	B10	AB	7
RF_B3_IO_7	0.329385	2586	7851	RF	B3	IO	7
RF_B4_IO_7	0.124308	2424	19500	RF	B4	IO	7
RF_B5_IO_7	1.07063	18949	17699	RF	B5	IO	7
RF_B6_ZA_7	0.443903	4649	10473	RF	B6	ZA	7
RF_B7_ZA_7	0.243465	4210	17292	RF	B7	ZA	7
RF_B8_ZA_7	0.240169	5570	23192	RF	B8	ZA	7
RF_B9_ZA_7	0.578578	8405	14527	RF	B9	ZA	7
RF_C10_ZA_21	9	9	1	RF	C10	ZA	21
RF_C1_AB_21	0.0339911	472	13886	RF	C1	AB	21
RF_C2_AB_21	0.226899	2205	9718	RF	C2	AB	21
RF_C3_AB_21	0.261316	2419	9257	RF	C3	AB	21
RF_C4_ZA_21	0.262141	3147	12005	RF	C4	ZA	21
RF_C5_ZA_21	0.242131	3200	13216	RF	C5	ZA	21
RF_C6_IO_21	0.136463	1442	10567	RF	C6	IO	21
RF_C7_AB_21	0.444527	5970	13430	RF	C7	AB	21
RF_C8_IO_21	0.188499	2583	13703	RF	C8	IO	21
RF_C9_AB_21	0.46041	11926	25903	RF	C9	AB	21
RF_D10_NI_21	0.15816	4143	26195	RF	D10	NI	21
RF_D1_IO_21	0.137269	4569	33285	RF	D1	IO	21
RF_D2_ZA_21	0.281511	3511	12472	RF	D2	ZA	21
RF_D3_NI_21	0.327639	1170	3571	RF	D3	NI	21
RF_D4_ZA_21	0.198346	2686	13542	RF	D4	ZA	21
RF_D5_IO_21	0.204711	6535	31923	RF	D5	IO	21
RF_D6_IO_21	0.252586	2149	8508	RF	D6	IO	21
RF_D7_NI_21	1.55521	6986	4492	RF	D7	NI	21
RF_D8_NI_21	1.95677	14484	7402	RF	D8	NI	21
RF_D9_NI_21	0.288455	3383	11728	RF	D9	NI	21

## Sheet: AF
Sample	F/B	Firmicutes	Bacteroidota	Sample_number	Treatment	DPI
AF_E10_AB_7	0.240033	6478	26988	E10	AB	7
AF_E7_AB_7	0.269262	12221	45387	E7	AB	7
AF_E8_AB_7	0.125	1	8	E8	AB	7
AF_F10_AB_7	0.250238	5522	22067	F10	AB	7
AF_G1_AB_21	0.395411	8461	21398	G1	AB	21
AF_G2_AB_21	0.508676	6156	12102	G2	AB	21
AF_G3_AB_21	0.502689	7853	15622	G3	AB	21
AF_G7_AB_21	0.728068	13229	18170	G7	AB	21
AF_E4_IO_7	0.784708	12808	16322	E4	IO	7
AF_E5_IO_7	1.18079	14225	12047	E5	IO	7
AF_F3_IO_7	0.257621	5468	21225	F3	IO	7
AF_F5_IO_7	0.138257	5784	41835	F5	IO	7
AF_G6_IO_21	0.374073	10189	27238	G6	IO	21
AF_G8_IO_21	0.874105	8054	9214	G8	IO	21
AF_H1_IO_21	1.05377	26044	24715	H1	IO	21
AF_H5_IO_21	0.941594	20845	22138	H5	IO	21
AF_H6_IO_21	0.601656	9372	15577	H6	IO	21
AF_E1_NI_7	0.5	2	4	E1	NI	7
AF_E2_NI_7	0.472222	17	36	E2	NI	7
AF_E3_NI_7	0.546512	47	86	E3	NI	7
AF_F1_NI_7	0.25	1	4	F1	NI	7
AF_F2_NI_7	0.393444	3877	9854	F2	NI	7
AF_H10_NI_21	0.967588	9762	10089	H10	NI	21
AF_H3_NI_21	0.541375	28400	52459	H3	NI	21
AF_H7_NI_21	0.374034	11420	30532	H7	NI	21
AF_H8_NI_21	0.598599	6493	10847	H8	NI	21
AF_H9_NI_21	0.704027	15823	22475	H9	NI	21
AF_E6_ZA_7	0.167917	3536	21058	E6	ZA	7
AF_F6_ZA_7	0.442126	12372	27983	F6	ZA	7
AF_F7_ZA_7	0.19937	5506	27617	F7	ZA	7
AF_F8_ZA_7	0.408604	22729	55626	F8	ZA	7
AF_G10_ZA_21	0	0	1	G10	ZA	21
AF_G4_ZA_21	0.414542	12925	31179	G4	ZA	21
AF_G5_ZA_21	0.502102	9792	19502	G5	ZA	21
AF_H2_ZA_21	0.426484	12432	29150	H2	ZA	21
AF_H4_ZA_21	1.11111	10	9	H4	ZA	21

## Sheet: Abo
Sample	F/B	Firmicutes	Bacteroidota	Sample_number	Treatment	DPI
Abo_A10_AB_7	0.555556	15	27	A10	AB	7
Abo_A9_AB_7	1.01754	58	57	A9	AB	7
Abo_B10_AB_7	0.791159	7266	9184	B10	AB	7
Abo_A4_IO_7	1.0472	10471	9999	A4	IO	7
Abo_A5_IO_7	0.667011	7752	11622	A5	IO	7
Abo_B3_IO_7	0.9369	10646	11363	B3	IO	7
Abo_B4_IO_7	0.975997	9027	9249	B4	IO	7
Abo_B5_IO_7	0.469828	11640	24775	B5	IO	7
Abo_A1_NI_7	0.891748	11887	13330	A1	NI	7
Abo_A2_NI_7	0.515884	12228	23703	A2	NI	7
Abo_B1_NI_7	0.30056	5900	19630	B1	NI	7
Abo_B2_NI_7	0.622623	7172	11519	B2	NI	7
Abo_A6_ZA_7	1.22022	338	277	A6	ZA	7
Abo_B6_ZA_7	0.98803	7346	7435	B6	ZA	7
Abo_B7_ZA_7	0.718653	4184	5822	B7	ZA	7
Abo_B8_ZA_7	0.663148	3581	5400	B8	ZA	7
Abo_B9_ZA_7	1.35065	312	231	B9	ZA	7
Abo_C1_AB_21	0.238371	2301	9653	C1	AB	21
Abo_C2_AB_21	1.33333	4	3	C2	AB	21
Abo_C7_AB_21	0.433594	111	256	C7	AB	21
Abo_C9_AB_21	0.947368	18	19	C9	AB	21
Abo_C6_IO_21	0.333333	5	15	C6	IO	21
Abo_C8_IO_21	0.792903	2324	2931	C8	IO	21
Abo_D1_IO_21	0.168614	202	1198	D1	IO	21
Abo_D5_IO_21	2	6	3	D5	IO	21
Abo_D6_IO_21	0.571429	36	63	D6	IO	21
Abo_D10_NI_21	0.54045	8070	14932	D10	NI	21
Abo_D3_NI_21	0.286016	3111	10877	D3	NI	21
Abo_D9_NI_21	0.823064	4475	5437	D9	NI	21
Abo_C10_ZA_21	0.833333	5	6	C10	ZA	21
Abo_C4_ZA_21	0.532167	6510	12233	C4	ZA	21
Abo_C5_ZA_21	0	0	1	C5	ZA	21
Abo_D2_ZA_21	0.348344	3419	9815	D2	ZA	21
Abo_D4_ZA_21	1.23529	42	34	D4	ZA	21

## Sheet: Blood
Sample	F/B	Firmicutes	Bacteroidota	Sample_number	Treatment	DPI
Blood_E7_AB_7	0.4	2	5	E7	AB	7
Blood_E8_AB_7	0	0	7	E8	AB	7
Blood_E9_AB_7	0.166667	1	6	E9	AB	7
Blood_E4_IO_7	0.46875	15	32	E4	IO	7
Blood_E5_IO_7	2	2	1	E5	IO	7
Blood_F3_IO_7		0	0	F3	IO	7
Blood_F4_IO_7	0	0	1	F4	IO	7
Blood_F5_IO_7	0.239183	1570	6564	F5	IO	7
Blood_E1_NI_7	1	2	2	E1	NI	7
Blood_E2_NI_7	0.333333	2	6	E2	NI	7
Blood_E3_NI_7	0	0	3	E3	NI	7
Blood_F1_NI_7	0	0	1	F1	NI	7
Blood_F2_NI_7	0.416667	5	12	F2	NI	7
Blood_E6_ZA_7	0.2	3	15	E6	ZA	7
Blood_F6_ZA_7	1	1	1	F6	ZA	7
Blood_F7_ZA_7	0.5	1	2	F7	ZA	7
Blood_F8_ZA_7	0	0	1	F8	ZA	7
Blood_F9_ZA_7	0.75	6	8	F9	ZA	7
Blood_G1_AB_21	0.338768	187	552	G1	AB	21
Blood_G2_AB_21	0.323061	6447	19956	G2	AB	21
Blood_G3_AB_21		1	0	G3	AB	21
Blood_G7_AB_21	0.141821	1564	11028	G7	AB	21
Blood_G9_AB_21	0.313469	1941	6192	G9	AB	21
Blood_G6_IO_21	0.229162	2084	9094	G6	IO	21
Blood_G8_IO_21	0.293077	4174	14242	G8	IO	21
Blood_H1_IO_21	0.27	108	400	H1	IO	21
Blood_H5_IO_21	0.131716	76	577	H5	IO	21
Blood_H6_IO_21	0.314394	3320	10560	H6	IO	21
Blood_H10_NI_21	0.666667	2	3	H10	NI	21
Blood_H3_NI_21	0.178885	15509	86698	H3	NI	21
Blood_H7_NI_21	0.244747	2050	8376	H7	NI	21
Blood_H8_NI_21	0.143592	2204	15349	H8	NI	21
Blood_H9_NI_21	1	5	5	H9	NI	21
Blood_G10_ZA_21	0.349262	2083	5964	G10	ZA	21
Blood_G4_ZA_21	0.263734	3831	14526	G4	ZA	21
Blood_G5_ZA_21	0.266049	3390	12742	G5	ZA	21
Blood_H2_ZA_21	0.254888	30699	120441	H2	ZA	21
Blood_H4_ZA_21		0	0	H4	ZA	21

## Sheet: Fecal
Sample	F/B	Firmicutes	Bacteroidota	Sample_number	Treatment	DPI
Fec_A10_AB_7	1.41795	10714	7556	A10	AB	7
Fec_A6_ZA_7	0	0	1	A6	ZA	7
Fec_A8_AB_7		1	0	A8	AB	7
Fec_A9_AB_7	0	0	1	A9	AB	7
Fec_B10_AB_7	1.95533	7047	3604	B10	AB	7
Fec_B1_NI_7	3.49698	169551	48485	B1	NI	7
Fec_B3_IO_7	2.04153	47492	23263	B3	IO	7
Fec_B4_IO_7	1.68097	2782	1655	B4	IO	7
Fec_B5_IO_7	0.931962	21834	23428	B5	IO	7
Fec_B6_ZA_7	1.66325	11207	6738	B6	ZA	7
Fec_B7_ZA_7	1.11358	6353	5705	B7	ZA	7
Fec_B8_ZA_7	2.30836	15436	6687	B8	ZA	7
Fec_B9_ZA_7	1.45036	70934	48908	B9	ZA	7
Fec_C10_ZA_21	1.50585	15051	9995	C10	ZA	21
Fec_C1_AB_21	3.4738	146789	42256	C1	AB	21
Fec_C2_AB_21	2.40132	3991	1662	C2	AB	21
Fec_C3_AB_21	0.458256	3436	7498	C3	AB	21
Fec_C4_ZA_21	1.18022	2744	2325	C4	ZA	21
Fec_C5_ZA_21	1.39427	3455	2478	C5	ZA	21
Fec_C6_IO_21	1.9034	1399	735	C6	IO	21
Fec_C7_AB_21	0.888192	2550	2871	C7	AB	21
Fec_C8_IO_21	1.9976	4157	2081	C8	IO	21
Fec_C9_AB_21		2	0	C9	AB	21
Fec_D7_NI_21	1.72005	7668	4458	D7	NI	21

## Sheet: MLN
Sample	F/B	Firmicutes	Bacteroidota	Sample_number	Treatment	DPI
MLN_A10_AB_7		0	0	A10	AB	7
MLN_A4_IO_7	0.318182	7	22	A4	IO	7
MLN_A5_IO_7	0.356612	240	673	A5	IO	7
MLN_B10_AB_7		0	0	B10	AB	7
MLN_B2_NI_7	0	0	1	B2	NI	7
MLN_B3_IO_7		1	0	B3	IO	7
MLN_B4_IO_7	0	0	1	B4	IO	7
MLN_B5_IO_7	2	2	1	B5	IO	7
MLN_B6_ZA_7	0.353741	104	294	B6	ZA	7
MLN_B7_ZA_7	0.365248	103	282	B7	ZA	7
MLN_B8_ZA_7	0.371486	185	498	B8	ZA	7
MLN_B9_ZA_7	0	0	1	B9	ZA	7
MLN_C10_ZA_21	0.3367	100	297	C10	ZA	21
MLN_C1_AB_21	0.8	4	5	C1	AB	21
MLN_C2_AB_21	0.246429	69	280	C2	AB	21
MLN_C3_AB_21	0.3625	87	240	C3	AB	21
MLN_C4_ZA_21	0.391304	90	230	C4	ZA	21
MLN_C5_ZA_21	0.0434783	1	23	C5	ZA	21
MLN_C6_IO_21	0.393939	260	660	C6	IO	21
MLN_C7_AB_21	0.315385	41	130	C7	AB	21
MLN_C8_IO_21	0.697368	53	76	C8	IO	21
MLN_C9_AB_21	0.322581	40	124	C9	AB	21
MLN_D2_ZA_21	0.168478	31	184	D2	ZA	21
MLN_D3_NI_21	0.306122	315	1029	D3	NI	21
MLN_D4_ZA_21	0.34202	105	307	D4	ZA	21
MLN_D5_IO_21	0.370787	33	89	D5	IO	21
MLN_D6_IO_21	0.27476	86	313	D6	IO	21

## Sheet: RF
Sample	F/B	Firmicutes	Bacteroidota	Sample_number	Treatment	DPI
RF_B10_AB_7	0.321754	11281	35061	B10	AB	7
RF_B3_IO_7	0.329385	2586	7851	B3	IO	7
RF_B4_IO_7	0.124308	2424	19500	B4	IO	7
RF_B5_IO_7	1.07063	18949	17699	B5	IO	7
RF_A1_NI_7	0.227533	3861	16969	A1	NI	7
RF_B6_ZA_7	0.443903	4649	10473	B6	ZA	7
RF_B7_ZA_7	0.243465	4210	17292	B7	ZA	7
RF_B8_ZA_7	0.240169	5570	23192	B8	ZA	7
RF_B9_ZA_7	0.578578	8405	14527	B9	ZA	7
RF_C1_AB_21	0.0339911	472	13886	C1	AB	21
RF_C2_AB_21	0.226899	2205	9718	C2	AB	21
RF_C3_AB_21	0.261316	2419	9257	C3	AB	21
RF_C7_AB_21	0.444527	5970	13430	C7	AB	21
RF_C9_AB_21	0.46041	11926	25903	C9	AB	21
RF_C6_IO_21	0.136463	1442	10567	C6	IO	21
RF_C8_IO_21	0.188499	2583	13703	C8	IO	21
RF_D1_IO_21	0.137269	4569	33285	D1	IO	21
RF_D5_IO_21	0.204711	6535	31923	D5	IO	21
RF_D6_IO_21	0.252586	2149	8508	D6	IO	21
RF_D10_NI_21	0.15816	4143	26195	D10	NI	21
RF_D3_NI_21	0.327639	1170	3571	D3	NI	21
RF_D7_NI_21	1.55521	6986	4492	D7	NI	21
RF_D8_NI_21	1.95677	14484	7402	D8	NI	21
RF_D9_NI_21	0.288455	3383	11728	D9	NI	21
RF_C10_ZA_21	9	9	1	C10	ZA	21
RF_C4_ZA_21	0.262141	3147	12005	C4	ZA	21
RF_C5_ZA_21	0.242131	3200	13216	C5	ZA	21
RF_D2_ZA_21	0.281511	3511	12472	D2	ZA	21
RF_D4_ZA_21	0.198346	2686	13542	D4	ZA	21

## Sheet: ALN
Sample	F/B	Firmicutes	Bacteroidota	Sample_number	Treatment	DPI
ALN_E9_AB_7		0	0	E9	AB	7
ALN_F10_AB_7	0.205336	431	2099	F10	AB	7
ALN_E4_IO_7	0.371585	408	1098	E4	IO	7
ALN_E5_IO_7	0.342657	490	1430	E5	IO	7
ALN_F3_IO_7	0.308034	625	2029	F3	IO	7
ALN_F4_IO_7	0.410127	162	395	F4	IO	7
ALN_F5_IO_7	0.628272	120	191	F5	IO	7
ALN_F1_NI_7	0.506579	385	760	F1	NI	7
ALN_F2_NI_7	0	0	2	F2	NI	7
ALN_F6_ZA_7	0.339254	573	1689	F6	ZA	7
ALN_F7_ZA_7	0.376844	332	881	F7	ZA	7
ALN_F8_ZA_7	0.29212	215	736	F8	ZA	7
ALN_F9_ZA_7	0.17096	146	854	F9	ZA	7
ALN_G2_AB_21	0	0	1	G2	AB	21
ALN_G3_AB_21		0	0	G3	AB	21
ALN_G9_AB_21	2	2	1	G9	AB	21
ALN_G6_IO_21	0.228748	148	647	G6	IO	21
ALN_G8_IO_21	0.345107	469	1359	G8	IO	21
ALN_H1_IO_21	1.08092	561	519	H1	IO	21
ALN_H5_IO_21	0.457813	586	1280	H5	IO	21
ALN_H6_IO_21	0.311734	178	571	H6	IO	21
ALN_H3_NI_21	0.350329	426	1216	H3	NI	21
ALN_H7_NI_21	0.317829	41	129	H7	NI	21
ALN_H8_NI_21	0.260274	152	584	H8	NI	21
ALN_G10_ZA_21	0.33815	819	2422	G10	ZA	21
ALN_G4_ZA_21	0.342144	233	681	G4	ZA	21
ALN_G5_ZA_21	1	1	1	G5	ZA	21
ALN_H2_ZA_21	2.26948	699	308	H2	ZA	21
ALN_H4_ZA_21	0.341108	234	686	H4	ZA	21
