# Supplementary material for: What Metagenomics Reveals of Microbial Populations in a Host-Parasite Relationship Between Alpine Goats and <em>Haemonchus contortus</em>
Source: Preprints.org preprint supplement (doi:10.20944/preprints202312.1796.v1), 2023-12-25
Supplement: Supplementary file 4 [file bSample_information.xlsx]

## Sheet: Combined
Experiment Accession	Run	Name used	Sample_name	Library Name	SHORT_NAME	Days post inoculation (dpi)	Biosample	Study Accession	Sample Accession	Total Size, Mb	Experiment Title	Treatment	Tissue Abbreviation
SRX7924572	SRR11320589	AF_E4_IO	E42_S375	Langston-AF-E4_2_S375	E4_S375	7	SAMN14389745	SRP253064	SRS6329524	17.11	abomasum fluid samples	Infection only	AF
SRX7924573	SRR11320588	AF_E5_IO	E520_S382	Langston-AF-E5_20_S382	E5_S382	7	SAMN14389746	SRP253064	SRS6329525	19.29	abomasum fluid samples	Infection only	AF
SRX7924582	SRR11320579	AF_F3_IO	F313_S179	Langston-AF-F3_13_S179	F3_S179	7	SAMN14389754	SRP253064	SRS6329534	14.19	abomasum fluid samples	Infection only	AF
SRX7924583	SRR11320578	AF_F5_IO	F551_S195	Langston-AF-F5_51_S195	F5_S195	7	SAMN14389756	SRP253064	SRS6329535	23.02	abomasum fluid samples	Infection only	AF
SRX7924567	SRR11320594	AF_E10_AB	E1050_S156	Langston-AF-E10_50_S156	E10_S156	7	SAMN14389741	SRP253064	SRS6329519	18.92	abomasum fluid samples	Infection, AB inject	AF
SRX7924575	SRR11320586	AF_E7_AB	E730_S133	Langston-AF-E7_30_S133	E7_S133	7	SAMN14389748	SRP253064	SRS6329527	37.57	abomasum fluid samples	Infection, AB inject	AF
SRX7924576	SRR11320585	AF_E8_AB	E825_S142	Langston-AF-E8_25_S142	E8_S142	7	SAMN14389749	SRP253064	SRS6329528	0.08	abomasum fluid samples	Infection, AB inject	AF
SRX7924577	SRR11320584	AF_E9_AB	E933_S68	Langston-AF-E9_33_S68	E9_S68	7	SAMN14389750	SRP253064	SRS6329529	0.08	abomasum fluid samples	Infection, AB inject	AF
SRX7924578	SRR11320583	AF_F10_AB	F1017_S236	Langston-AF-F10_17_S236	F10_S236	7	SAMN14389751	SRP253064	SRS6329530	17.67	abomasum fluid samples	Infection, AB inject	AF
SRX7924574	SRR11320587	AF_E6_ZA	E657_S126	Langston-AF-E6_57_S126	E6_S126	7	SAMN14389747	SRP253064	SRS6329526	13.13	abomasum fluid samples	Infection, ZA inject	AF
SRX7924584	SRR11320577	AF_F6_ZA	F66_S204	Langston-AF-F6_6_S204	F6_S204	7	SAMN14389757	SRP253064	SRS6329536	18.41	abomasum fluid samples	Infection, ZA inject	AF
SRX7924585	SRR11320576	AF_F7_ZA	F731_S212	Langston-AF-F7_31_S212	F7_S212	7	SAMN14389758	SRP253064	SRS6329537	18.28	abomasum fluid samples	Infection, ZA inject	AF
SRX7924586	SRR11320575	AF_F8_ZA	F827_S220	Langston-AF-F8_27_S220	F8_S220	7	SAMN14389759	SRP253064	SRS6329538	42.04	abomasum fluid samples	Infection, ZA inject	AF
SRX7924568	SRR11320593	AF_E1_NI	E18_S352	Langston-AF-E1_8_S352	E1_S352	7	SAMN14389742	SRP253064	SRS6329520	0.08	abomasum fluid samples	No infection	AF
SRX7924569	SRR11320592	AF_E2_NI	E244_S360	Langston-AF-E2_44_S360	E2_S360	7	SAMN14389743	SRP253064	SRS6329521	1.02	abomasum fluid samples	No infection	AF
SRX7924571	SRR11320590	AF_E3_NI	E352_S367	Langston-AF-E3_52_S367	E3_S367	7	SAMN14389744	SRP253064	SRS6329523	0.83	abomasum fluid samples	No infection	AF
SRX7924579	SRR11320582	AF_F1_NI	F128_S163	Langston-AF-F1_28_S163	F1_S163	7	SAMN14389752	SRP253064	SRS6329531	0.25	abomasum fluid samples	No infection	AF
SRX7924580	SRR11320581	AF_F2_NI	F254_S171	Langston-AF-F2_54_S171	F2_S171	7	SAMN14389753	SRP253064	SRS6329532	14	abomasum fluid samples	No infection	AF
SRX7924723	SRR11320438	AF_G6_IO	G666_S286	Langston-AF-G6_66_S286	G6_S286	21	SAMN14389766	SRP253064	SRS6329674	22.61	abomasum fluid samples	Infection only	AF
SRX7924725	SRR11320436	AF_G8_IO	G836_S302	Langston-AF-G8_36_S302	G8_S302	21	SAMN14389768	SRP253064	SRS6329676	20.83	abomasum fluid samples	Infection only	AF
SRX7924727	SRR11320434	AF_H1_IO	H112_S327	Langston-AF-H1_12_S327	H1_S327	21	SAMN14389770	SRP253064	SRS6329678	38.41	abomasum fluid samples	Infection only	AF
SRX7924731	SRR11320430	AF_H5_IO	H542_S359	Langston-AF-H5_42_S359	H5_S359	21	SAMN14389774	SRP253064	SRS6329682	26.4	abomasum fluid samples	Infection only	AF
SRX7924733	SRR11320428	AF_H6_IO	H624_S368	Langston-AF-H6_24_S368	H6_S368	21	SAMN14389775	SRP253064	SRS6329684	18.66	abomasum fluid samples	Infection only	AF
SRX7924588	SRR11320573	AF_G1_AB	G149_S245	Langston-AF-G1_49_S245	G1_S245	21	SAMN14389761	SRP253064	SRS6329540	34.33	abomasum fluid samples	Infection, AB inject	AF
SRX7924589	SRR11320572	AF_G2_AB	G223_S253	Langston-AF-G2_23_S253	G2_S253	21	SAMN14389762	SRP253064	SRS6329541	11.49	abomasum fluid samples	Infection, AB inject	AF
SRX7924590	SRR11320571	AF_G3_AB	G310_S261	Langston-AF-G3_10_S261	G3_S261	21	SAMN14389763	SRP253064	SRS6329542	17.07	abomasum fluid samples	Infection, AB inject	AF
SRX7924724	SRR11320437	AF_G7_AB	G739_S294	Langston-AF-G7_39_S294	G7_S294	21	SAMN14389767	SRP253064	SRS6329675	26.5	abomasum fluid samples	Infection, AB inject	AF
SRX7924587	SRR11320574	AF_G10_ZA	G105_S49	Langston-AF-G10_5_S49	G10_S49	21	SAMN14389760	SRP253064	SRS6329539	0.08	abomasum fluid samples	Infection, ZA inject	AF
SRX7924720	SRR11320441	AF_G4_ZA	G453_S269	Langston-AF-G4_53_S269	G4_S269	21	SAMN14389764	SRP253064	SRS6329672	22.56	abomasum fluid samples	Infection, ZA inject	AF
SRX7924722	SRR11320439	AF_G5_ZA	G529_S277	Langston-AF-G5_29_S277	G5_S277	21	SAMN14389765	SRP253064	SRS6329673	22.99	abomasum fluid samples	Infection, ZA inject	AF
SRX7924728	SRR11320433	AF_H2_ZA	H246_S335	Langston-AF-H2_46_S335	H2_S335	21	SAMN14389771	SRP253064	SRS6329679	21.12	abomasum fluid samples	Infection, ZA inject	AF
SRX7924730	SRR11320431	AF_H4_ZA	H443_S351	Langston-AF-H4_43_S351	H4_S351	21	SAMN14389773	SRP253064	SRS6329681	0.08	abomasum fluid samples	Infection, ZA inject	AF
SRX7924726	SRR11320435	AF_H10_NI	H1032_S256	Langston-AF-H10_32_S256	H10_S256	21	SAMN14389769	SRP253064	SRS6329677	25.04	abomasum fluid samples	No infection	AF
SRX7924729	SRR11320432	AF_H3_NI	H334_S343	Langston-AF-H3_34_S343	H3_S343	21	SAMN14389772	SRP253064	SRS6329680	48.34	abomasum fluid samples	No infection	AF
SRX7924734	SRR11320427	AF_H7_NI	H762_S376	Langston-AF-H7_62_S376	H7_S376	21	SAMN14389776	SRP253064	SRS6329685	25.82	abomasum fluid samples	No infection	AF
SRX7924735	SRR11320426	AF_H8_NI	H845_S384	Langston-AF-H8_45_S384	H8_S384	21	SAMN14389777	SRP253064	SRS6329686	7.7	abomasum fluid samples	No infection	AF
SRX7924736	SRR11320425	AF_H9_NI	H914_S248	Langston-AF-H9_14_S248	H9_S248	21	SAMN14389778	SRP253064	SRS6329687	37.91	abomasum fluid samples	No infection	AF
SRX7924739	SRR11320422	ALN_E4_IO	E42_S105	Langston-ALN-E4_2_S105	E4_S105	7	SAMN14389781	SRP253064	SRS6329690	6.46	abomasum lymph node samples	Infection only	ALN
SRX7924740	SRR11320421	ALN_E5_IO	E520_S113	Langston-ALN-E5_20_S113	E5_S113	7	SAMN14389782	SRP253064	SRS6329691	7.35	abomasum lymph node samples	Infection only	ALN
SRX7924648	SRR11320513	ALN_F3_IO	F313_S202	Langston-ALN-F3_13_S202	F3_S202	7	SAMN14389790	SRP253064	SRS6329600	9.09	abomasum lymph node samples	Infection only	ALN
SRX7924649	SRR11320512	ALN_F4_IO	F458_S122	Langston-ALN-F4_58_S122	F4_S122	7	SAMN14389791	SRP253064	SRS6329601	8.24	abomasum lymph node samples	Infection only	ALN
SRX7924650	SRR11320511	ALN_F5_IO	F551_S130	Langston-ALN-F5_51_S130	F5_S130	7	SAMN14389792	SRP253064	SRS6329602	10.5	abomasum lymph node samples	Infection only	ALN
SRX7924737	SRR11320424	ALN_E10_AB	E1050_S73	Langston-ALN-E10_50_S73	E10_S73	7	SAMN14389779	SRP253064	SRS6329688	0.08	abomasum lymph node samples	Infection, AB inject	ALN
SRX7924742	SRR11320419	ALN_E7_AB	E730_S49	Langston-ALN-E7_30_S49	E7_S49	7	SAMN14389784	SRP253064	SRS6329693	0.08	abomasum lymph node samples	Infection, AB inject	ALN
SRX7924744	SRR11320417	ALN_E8_AB	E825_S57	Langston-ALN-E8_25_S57	E8_S57	7	SAMN14389785	SRP253064	SRS6329695	0.08	abomasum lymph node samples	Infection, AB inject	ALN
SRX7924745	SRR11320416	ALN_E9_AB	E933_S65	Langston-ALN-E9_33_S65	E9_S65	7	SAMN14389786	SRP253064	SRS6329696	0.08	abomasum lymph node samples	Infection, AB inject	ALN
SRX7924746	SRR11320415	ALN_F10_AB	F1017_S170	Langston-ALN-F10_17_S170	F10_S170	7	SAMN14389787	SRP253064	SRS6329697	16.62	abomasum lymph node samples	Infection, AB inject	ALN
SRX7924741	SRR11320420	ALN_E6_ZA	E657_S41	Langston-ALN-E6_57_S41	E6_S41	7	SAMN14389783	SRP253064	SRS6329692	0.08	abomasum lymph node samples	Infection, ZA inject	ALN
SRX7924651	SRR11320510	ALN_F6_ZA	F66_S138	Langston-ALN-F6_6_S138	F6_S138	7	SAMN14389793	SRP253064	SRS6329603	10.59	abomasum lymph node samples	Infection, ZA inject	ALN
SRX7924652	SRR11320509	ALN_F7_ZA	F731_S146	Langston-ALN-F7_31_S146	F7_S146	7	SAMN14389794	SRP253064	SRS6329604	14.53	abomasum lymph node samples	Infection, ZA inject	ALN
SRX7924654	SRR11320507	ALN_F8_ZA	F827_S154	Langston-ALN-F8_27_S154	F8_S154	7	SAMN14389795	SRP253064	SRS6329606	4.06	abomasum lymph node samples	Infection, ZA inject	ALN
SRX7924655	SRR11320506	ALN_F9_ZA	F938_S162	Langston-ALN-F9_38_S162	F9_S162	7	SAMN14389796	SRP253064	SRS6329607	2.38	abomasum lymph node samples	Infection, ZA inject	ALN
SRX7924738	SRR11320423	ALN_E3_NI	E352_S17	Langston-ALN-E3_52_S17	E3_S17	7	SAMN14389780	SRP253064	SRS6329689	0.08	abomasum lymph node samples	No infection	ALN
SRX7924747	SRR11320414	ALN_F1_NI	F128_S98	Langston-ALN-F1_28_S98	F1_S98	7	SAMN14389788	SRP253064	SRS6329699	7.96	abomasum lymph node samples	No infection	ALN
SRX7924647	SRR11320514	ALN_F2_NI	F254_S194	Langston-ALN-F2_54_S194	F2_S194	7	SAMN14389789	SRP253064	SRS6329599	8	abomasum lymph node samples	No infection	ALN
SRX7924662	SRR11320499	ALN_G6_IO	G666_S198	Langston-ALN-G6_66_S198	G6_S198	21	SAMN14389803	SRP253064	SRS6329614	11.37	abomasum lymph node samples	Infection only	ALN
SRX7924663	SRR11320498	ALN_G8_IO	G836_S311	Langston-ALN-G8_36_S311	G8_S311	21	SAMN14389804	SRP253064	SRS6329615	9.31	abomasum lymph node samples	Infection only	ALN
SRX7924539	SRR11320622	ALN_H1_IO	H112_S339	Langston-ALN-H1_12_S339	H1_S339	21	SAMN14389806	SRP253064	SRS6329491	8.63	abomasum lymph node samples	Infection only	ALN
SRX7924543	SRR11320618	ALN_H5_IO	H542_S375	Langston-ALN-H5_42_S375	H5_S375	21	SAMN14389810	SRP253064	SRS6329495	7.34	abomasum lymph node samples	Infection only	ALN
SRX7924544	SRR11320617	ALN_H6_IO	H624_S384	Langston-ALN-H6_24_S384	H6_S384	21	SAMN14389811	SRP253064	SRS6329496	7.47	abomasum lymph node samples	Infection only	ALN
SRX7924657	SRR11320504	ALN_G1_AB	G149_S177	Langston-ALN-G1_49_S177	G1_S177	21	SAMN14389798	SRP253064	SRS6329609	1.13	abomasum lymph node samples	Infection, AB inject	ALN
SRX7924658	SRR11320503	ALN_G2_AB	G223_S186	Langston-ALN-G2_23_S186	G2_S186	21	SAMN14389799	SRP253064	SRS6329610	1.62	abomasum lymph node samples	Infection, AB inject	ALN
SRX7924659	SRR11320502	ALN_G3_AB	G310 _S291	Langston-ALN-G3_10 _S291	G3_S291	21	SAMN14389800	SRP253064	SRS6329611	9.88	abomasum lymph node samples	Infection, AB inject	ALN
SRX7924538	SRR11320623	ALN_G9_AB	G919_S321	Langston-ALN-G9_19_S321	G9_S321	21	SAMN14389805	SRP253064	SRS6329490	0.17	abomasum lymph node samples	Infection, AB inject	ALN
SRX7924656	SRR11320505	ALN_G10_ZA	G105_S330	Langston-ALN-G10_5_S330	G10_S330	21	SAMN14389797	SRP253064	SRS6329608	48.63	abomasum lymph node samples	Infection, ZA inject	ALN
SRX7924660	SRR11320501	ALN_G4_ZA	G453_S300	Langston-ALN-G4_53_S300	G4_S300	21	SAMN14389801	SRP253064	SRS6329612	9.42	abomasum lymph node samples	Infection, ZA inject	ALN
SRX7924661	SRR11320500	ALN_G5_ZA	G529_S101	Langston-ALN-G5_29_S101	G5_S101	21	SAMN14389802	SRP253064	SRS6329613	11.67	abomasum lymph node samples	Infection, ZA inject	ALN
SRX7924540	SRR11320621	ALN_H2_ZA	H246_S348	Langston-ALN-H2_46_S348	H2_S348	21	SAMN14389807	SRP253064	SRS6329492	15.07	abomasum lymph node samples	Infection, ZA inject	ALN
SRX7924542	SRR11320619	ALN_H4_ZA	H443_S366	Langston-ALN-H4_43_S366	H4_S366	21	SAMN14389809	SRP253064	SRS6329494	16.18	abomasum lymph node samples	Infection, ZA inject	ALN
SRX7924541	SRR11320620	ALN_H3_NI	H334_S357	Langston-ALN-H3_34_S357	H3_S357	21	SAMN14389808	SRP253064	SRS6329493	7.12	abomasum lymph node samples	No infection	ALN
SRX7924545	SRR11320616	ALN_H7_NI	H762_S211	Langston-ALN-H7_62_S211	H7_S211	21	SAMN14389812	SRP253064	SRS6329497	4.14	abomasum lymph node samples	No infection	ALN
SRX7924546	SRR11320615	ALN_H8_NI	H845_S219	Langston-ALN-H8_45_S219	H8_S219	21	SAMN14389813	SRP253064	SRS6329498	3.17	abomasum lymph node samples	No infection	ALN
SRX7924547	SRR11320614	ALN_H9_NI	H914_S60	Langston-ALN-H9_14_S60	H9_S60	21	SAMN14389814	SRP253064	SRS6329499	0.07	abomasum lymph node samples	No infection	ALN
SRX7924688	SRR11320473	Abo_A4_IO	A42_S359	Langston-Abo-A4_2_S359	A4_S359	7	SAMN14389707	SRP253064	SRS6329640	14.32	abomasum samples	Infection only	Abo
SRX7924570	SRR11320591	Abo_A5_IO	A520_S350	Langston-Abo-A5_20_S350	A5_S350	7	SAMN14389708	SRP253064	SRS6329522	21.05	abomasum samples	Infection only	Abo
SRX7924548	SRR11320613	Abo_B3_IO	B313_S283	Langston-Abo-B3_13_S283	B3_S283	7	SAMN14389715	SRP253064	SRS6329500	17.3	abomasum samples	Infection only	Abo
SRX7924559	SRR11320602	Abo_B4_IO	B458_S275	Langston-Abo-B4_58_S275	B4_S275	7	SAMN14389716	SRP253064	SRS6329511	19.4	abomasum samples	Infection only	Abo
SRX7924626	SRR11320535	Abo_B5_IO	B551_S267	Langston-Abo-B5_51_S267	B5_S267	7	SAMN14389717	SRP253064	SRS6329578	27.03	abomasum samples	Infection only	Abo
SRX7924535	SRR11320626	Abo_A10_AB	A1050_S308	Langston-Abo-A10_50_S308	A10_S308	7	SAMN14389704	SRP253064	SRS6329487	16.65	abomasum samples	Infection, AB inject	Abo
SRX7924721	SRR11320440	Abo_A8_AB	A825_S13	Langston-Abo-A8_25_S13	A8_S13	7	SAMN14389710	SRP253064	SRS6329671	0.08	abomasum samples	Infection, AB inject	Abo
SRX7924732	SRR11320429	Abo_A9_AB	A933_S316	Langston-Abo-A9_33_S316	A9_S316	7	SAMN14389711	SRP253064	SRS6329683	22.38	abomasum samples	Infection, AB inject	Abo
SRX7924743	SRR11320418	Abo_B10_AB	B1017_S220	Langston-Abo-B10_17_S220	B10_S220	7	SAMN14389712	SRP253064	SRS6329694	9.75	abomasum samples	Infection, AB inject	Abo
SRX7924581	SRR11320580	Abo_A6_ZA	A657_S342	Langston-Abo-A6_57_S342	A6_S342	7	SAMN14389709	SRP253064	SRS6329533	22.18	abomasum samples	Infection, ZA inject	Abo
SRX7924637	SRR11320524	Abo_B6_ZA	B66_S260	Langston-Abo-B6_6_S260	B6_S260	7	SAMN14389718	SRP253064	SRS6329589	10.79	abomasum samples	Infection, ZA inject	Abo
SRX7924693	SRR11320468	Abo_B7_ZA	B731_S244	Langston-Abo-B7_31_S244	B7_S244	7	SAMN14389719	SRP253064	SRS6329645	9.2	abomasum samples	Infection, ZA inject	Abo
SRX7924704	SRR11320457	Abo_B8_ZA	B827_S236	Langston-Abo-B8_27_S236	B8_S236	7	SAMN14389720	SRP253064	SRS6329655	9.7	abomasum samples	Infection, ZA inject	Abo
SRX7924715	SRR11320446	Abo_B9_ZA	B938_S228	Langston-Abo-B9_38_S228	B9_S228	7	SAMN14389721	SRP253064	SRS6329666	13.69	abomasum samples	Infection, ZA inject	Abo
SRX7924536	SRR11320625	Abo_A1_NI	A18_S384	Langston-Abo-A1_8_S384	A1_S384	7	SAMN14389705	SRP253064	SRS6329488	18.77	abomasum samples	No infection	Abo
SRX7924748	SRR11320413	Abo_A2_NI	A244_S376	Langston-Abo-A2_44_S376	A2_S376	7	SAMN14389706	SRP253064	SRS6329698	31.57	abomasum samples	No infection	Abo
SRX7924653	SRR11320508	Abo_B1_NI	B128_S299	Langston-Abo-B1_28_S299	B1_S299	7	SAMN14389713	SRP253064	SRS6329605	23.45	abomasum samples	No infection	Abo
SRX7924537	SRR11320624	Abo_B2_NI	B254_S291	Langston-Abo-B2_54_S291	B2_S291	7	SAMN14389714	SRP253064	SRS6329489	15.61	abomasum samples	No infection	Abo
SRX7924681	SRR11320480	Abo_C6_IO	C666_S286	Langston-Abo-C6_66_S286	C6_S286	21	SAMN14389728	SRP253064	SRS6329633	0.18	abomasum samples	Infection only	Abo
SRX7924684	SRR11320477	Abo_C8_IO	C836_S270	Langston-Abo-C8_36_S270	C8_S270	21	SAMN14389730	SRP253064	SRS6329636	8.9	abomasum samples	Infection only	Abo
SRX7924687	SRR11320474	Abo_D1_IO	D112_S247	Langston-Abo-D1_12_S247	D1_S247	21	SAMN14389733	SRP253064	SRS6329639	26.33	abomasum samples	Infection only	Abo
SRX7924563	SRR11320598	Abo_D5_IO	D542_S301	Langston-Abo-D5_42_S301	D5_S301	21	SAMN14389737	SRP253064	SRS6329515	0.09	abomasum samples	Infection only	Abo
SRX7924564	SRR11320597	Abo_D6_IO	D624_S208	Langston-Abo-D6_24_S208	D6_S208	21	SAMN14389738	SRP253064	SRS6329516	27.25	abomasum samples	Infection only	Abo
SRX7924608	SRR11320553	Abo_C1_AB	C149_S213	Langston-Abo-C1_49_S213	C1_S213	21	SAMN14389723	SRP253064	SRS6329560	14.36	abomasum samples	Infection, AB inject	Abo
SRX7924749	SRR11320412	Abo_C2_AB	C223_S205	Langston-Abo-C2_23_S205	C2_S205	21	SAMN14389724	SRP253064	SRS6329700	0.39	abomasum samples	Infection, AB inject	Abo
SRX7924760	SRR11320401	Abo_C3_AB	C310_S37	Langston-Abo-C3_10_S37	C3_S37	21	SAMN14389725	SRP253064	SRS6329711	0.07	abomasum samples	Infection, AB inject	Abo
SRX7924683	SRR11320478	Abo_C7_AB	C739_S278	Langston-Abo-C7_39_S278	C7_S278	21	SAMN14389729	SRP253064	SRS6329635	20.58	abomasum samples	Infection, AB inject	Abo
SRX7924685	SRR11320476	Abo_C9_AB	C919_S262	Langston-Abo-C9_19_S262	C9_S262	21	SAMN14389731	SRP253064	SRS6329637	1.49	abomasum samples	Infection, AB inject	Abo
SRX7924597	SRR11320564	Abo_C10_ZA	C105_S254	Langston-Abo-C10_5_S254	C10_S254	21	SAMN14389722	SRP253064	SRS6329549	0.19	abomasum samples	Infection, ZA inject	Abo
SRX7924771	SRR11320390	Abo_C4_ZA	C453_S285	Langston-Abo-C4_53_S285	C4_S285	21	SAMN14389726	SRP253064	SRS6329721	14.99	abomasum samples	Infection, ZA inject	Abo
SRX7924670	SRR11320491	Abo_C5_ZA	C529_S77	Langston-Abo-C5_29_S77	C5_S77	21	SAMN14389727	SRP253064	SRS6329622	0.08	abomasum samples	Infection, ZA inject	Abo
SRX7924689	SRR11320472	Abo_D2_ZA	D246_S239	Langston-Abo-D2_46_S239	D2_S239	21	SAMN14389734	SRP253064	SRS6329641	29.52	abomasum samples	Infection, ZA inject	Abo
SRX7924691	SRR11320470	Abo_D4_ZA	D443_S223	Langston-Abo-D4_43_S223	D4_S223	21	SAMN14389736	SRP253064	SRS6329643	18.56	abomasum samples	Infection, ZA inject	Abo
SRX7924686	SRR11320475	Abo_D10_NI	D1032_S256	Langston-Abo-D10_32_S256	D10_S256	21	SAMN14389732	SRP253064	SRS6329638	15.02	abomasum samples	No infection	Abo
SRX7924690	SRR11320471	Abo_D3_NI	D334_S231	Langston-Abo-D3_34_S231	D3_S231	21	SAMN14389735	SRP253064	SRS6329642	16.5	abomasum samples	No infection	Abo
SRX7924565	SRR11320596	Abo_D8_NI	D845_S80	Langston-Abo-D8_45_S80	D8_S80	21	SAMN14389739	SRP253064	SRS6329517	0.08	abomasum samples	No infection	Abo
SRX7924566	SRR11320595	Abo_D9_NI	D914_S248	Langston-Abo-D9_14_S248	D9_S248	21	SAMN14389740	SRP253064	SRS6329518	8.85	abomasum samples	No infection	Abo
SRX7924552	SRR11320609	Blood_E4_IO	E42_S147	Langston-Blood-E4_2_S147	E4_S147	7	SAMN14389818	SRP253064	SRS6329504	0.25	blood samples	Infection only	Blood
SRX7924553	SRR11320608	Blood_E5_IO	E520_S155	Langston-Blood-E5_20_S155	E5_S155	7	SAMN14389819	SRP253064	SRS6329505	1.11	blood samples	Infection only	Blood
SRX7924561	SRR11320600	Blood_F3_IO	F313_S221	Langston-Blood-F3_13_S221	F3_S221	7	SAMN14389827	SRP253064	SRS6329513	0.09	blood samples	Infection only	Blood
SRX7924562	SRR11320599	Blood_F4_IO	F458_S229	Langston-Blood-F4_58_S229	F4_S229	7	SAMN14389828	SRP253064	SRS6329514	0.5	blood samples	Infection only	Blood
SRX7924619	SRR11320542	Blood_F5_IO	F551_S237	Langston-Blood-F5_51_S237	F5_S237	7	SAMN14389829	SRP253064	SRS6329571	19.2	blood samples	Infection only	Blood
SRX7924555	SRR11320606	Blood_E7_AB	E730_S172	Langston-Blood-E7_30_S172	E7_S172	7	SAMN14389821	SRP253064	SRS6329507	1.56	blood samples	Infection, AB inject	Blood
SRX7924556	SRR11320605	Blood_E8_AB	E825_S180	Langston-Blood-E8_25_S180	E8_S180	7	SAMN14389822	SRP253064	SRS6329508	2.43	blood samples	Infection, AB inject	Blood
SRX7924557	SRR11320604	Blood_E9_AB	E933_S188	Langston-Blood-E9_33_S188	E9_S188	7	SAMN14389823	SRP253064	SRS6329509	1.28	blood samples	Infection, AB inject	Blood
SRX7924554	SRR11320607	Blood_E6_ZA	E657_S164	Langston-Blood-E6_57_S164	E6_S164	7	SAMN14389820	SRP253064	SRS6329506	2.7	blood samples	Infection, ZA inject	Blood
SRX7924620	SRR11320541	Blood_F6_ZA	F66_S246	Langston-Blood-F6_6_S246	F6_S246	7	SAMN14389830	SRP253064	SRS6329572	0.24	blood samples	Infection, ZA inject	Blood
SRX7924621	SRR11320540	Blood_F7_ZA	F731_S254	Langston-Blood-F7_31_S254	F7_S254	7	SAMN14389831	SRP253064	SRS6329573	0.08	blood samples	Infection, ZA inject	Blood
SRX7924622	SRR11320539	Blood_F8_ZA	F827_S262	Langston-Blood-F8_27_S262	F8_S262	7	SAMN14389832	SRP253064	SRS6329574	1.18	blood samples	Infection, ZA inject	Blood
SRX7924623	SRR11320538	Blood_F9_ZA	F938_S270	Langston-Blood-F9_38_S270	F9_S270	7	SAMN14389833	SRP253064	SRS6329575	0.94	blood samples	Infection, ZA inject	Blood
SRX7924549	SRR11320612	Blood_E1_NI	E18_S123	Langston-Blood-E1_8_S123	E1_S123	7	SAMN14389815	SRP253064	SRS6329501	0.11	blood samples	No infection	Blood
SRX7924550	SRR11320611	Blood_E2_NI	E244_S131	Langston-Blood-E2_44_S131	E2_S131	7	SAMN14389816	SRP253064	SRS6329502	0.11	blood samples	No infection	Blood
SRX7924551	SRR11320610	Blood_E3_NI	E352_S139	Langston-Blood-E3_52_S139	E3_S139	7	SAMN14389817	SRP253064	SRS6329503	0.17	blood samples	No infection	Blood
SRX7924558	SRR11320603	Blood_F1_NI	F128_S205	Langston-Blood-F1_28_S205	F1_S205	7	SAMN14389825	SRP253064	SRS6329510	0.09	blood samples	No infection	Blood
SRX7924560	SRR11320601	Blood_F2_NI	F254_S213	Langston-Blood-F2_54_S213	F2_S213	7	SAMN14389826	SRP253064	SRS6329512	0.12	blood samples	No infection	Blood
SRX7924631	SRR11320530	Blood_G6_IO	G666_S328	Langston-Blood-G6_66_S328	G6_S328	21	SAMN14389840	SRP253064	SRS6329583	24.36	blood samples	Infection only	Blood
SRX7924633	SRR11320528	Blood_G8_IO	G836_S344	Langston-Blood-G8_36_S344	G8_S344	21	SAMN14389842	SRP253064	SRS6329585	29.33	blood samples	Infection only	Blood
SRX7924636	SRR11320525	Blood_H1_IO	H112_S363	Langston-Blood-H1_12_S363	H1_S363	21	SAMN14389845	SRP253064	SRS6329588	0.82	blood samples	Infection only	Blood
SRX7924641	SRR11320520	Blood_H5_IO	H542_S373	Langston-Blood-H5_42_S373	H5_S373	21	SAMN14389849	SRP253064	SRS6329593	9.34	blood samples	Infection only	Blood
SRX7924642	SRR11320519	Blood_H6_IO	H624_S381	Langston-Blood-H6_24_S381	H6_S381	21	SAMN14389850	SRP253064	SRS6329594	21.15	blood samples	Infection only	Blood
SRX7924625	SRR11320536	Blood_G1_AB	G149_S287	Langston-Blood-G1_49_S287	G1_S287	21	SAMN14389835	SRP253064	SRS6329577	1.72	blood samples	Infection, AB inject	Blood
SRX7924627	SRR11320534	Blood_G2_AB	G223_S295	Langston-Blood-G2_23_S295	G2_S295	21	SAMN14389836	SRP253064	SRS6329579	38.44	blood samples	Infection, AB inject	Blood
SRX7924628	SRR11320533	Blood_G3_AB	G310_S303	Langston-Blood-G3_10_S303	G3_S303	21	SAMN14389837	SRP253064	SRS6329580	2.32	blood samples	Infection, AB inject	Blood
SRX7924632	SRR11320529	Blood_G7_AB	G739_S336	Langston-Blood-G7_39_S336	G7_S336	21	SAMN14389841	SRP253064	SRS6329584	19.05	blood samples	Infection, AB inject	Blood
SRX7924634	SRR11320527	Blood_G9_AB	G919_S352	Langston-Blood-G9_19_S352	G9_S352	21	SAMN14389843	SRP253064	SRS6329586	13.88	blood samples	Infection, AB inject	Blood
SRX7924624	SRR11320537	Blood_G10_ZA	G105_S360	Langston-Blood-G10_5_S360	G10_S360	21	SAMN14389834	SRP253064	SRS6329576	13.67	blood samples	Infection, ZA inject	Blood
SRX7924629	SRR11320532	Blood_G4_ZA	G453_S311	Langston-Blood-G4_53_S311	G4_S311	21	SAMN14389838	SRP253064	SRS6329581	28.95	blood samples	Infection, ZA inject	Blood
SRX7924630	SRR11320531	Blood_G5_ZA	G529_S319	Langston-Blood-G5_29_S319	G5_S319	21	SAMN14389839	SRP253064	SRS6329582	24.76	blood samples	Infection, ZA inject	Blood
SRX7924638	SRR11320523	Blood_H2_ZA	H246_S371	Langston-Blood-H2_46_S371	H2_S371	21	SAMN14389846	SRP253064	SRS6329590	213.47	blood samples	Infection, ZA inject	Blood
SRX7924640	SRR11320521	Blood_H4_ZA	H443_S364	Langston-Blood-H4_43_S364	H4_S364	21	SAMN14389848	SRP253064	SRS6329592	0.18	blood samples	Infection, ZA inject	Blood
SRX7924635	SRR11320526	Blood_H10_NI	H1032_S151	Langston-Blood-H10_32_S151	H10_S151	21	SAMN14389844	SRP253064	SRS6329587	2.75	blood samples	No infection	Blood
SRX7924639	SRR11320522	Blood_H3_NI	H334_S380	Langston-Blood-H3_34_S380	H3_S380	21	SAMN14389847	SRP253064	SRS6329591	144.9	blood samples	No infection	Blood
SRX7924643	SRR11320518	Blood_H7_NI	H762_S126	Langston-Blood-H7_62_S126	H7_S126	21	SAMN14389851	SRP253064	SRS6329595	29.45	blood samples	No infection	Blood
SRX7924644	SRR11320517	Blood_H8_NI	H845_S134	Langston-Blood-H8_45_S134	H8_S134	21	SAMN14389852	SRP253064	SRS6329596	29.16	blood samples	No infection	Blood
SRX7924645	SRR11320516	Blood_H9_NI	H914_S143	Langston-Blood-H9_14_S143	H9_S143	21	SAMN14389853	SRP253064	SRS6329597	3.12	blood samples	No infection	Blood
SRX7924698	SRR11320463	Fec_B3_IO	B313_S145	Langston-Fec-B3_13_S145	B3_S145	7	SAMN14389861	SRP253064	SRS6329552	52.39	Feacal samples	Infection only	Fec
SRX7924699	SRR11320462	Fec_B4_IO	B458_S147	Langston-Fec-B4_58_S147	B4_S147	7	SAMN14389862	SRP253064	SRS6329650	2.79	Feacal samples	Infection only	Fec
SRX7924700	SRR11320461	Fec_B5_IO	B551_S155	Langston-Fec-B5_51_S155	B5_S155	7	SAMN14389863	SRP253064	SRS6329651	22.25	Feacal samples	Infection only	Fec
SRX7924694	SRR11320467	Fec_A8_AB	A825_S58	Langston-Fec-A8_25_S58	A8_S58	7	SAMN14389857	SRP253064	SRS6329646	0.08	Feacal samples	Infection, AB inject	Fec
SRX7924646	SRR11320515	Fec_A10_AB	A1050_S114	Langston-Fec-A10_50_S114	A10_S114	7	SAMN14389854	SRP253064	SRS6329598	9.59	Feacal samples	Infection, AB inject	Fec
SRX7924695	SRR11320466	Fec_A9_AB	A933_S66	Langston-Fec-A9_33_S66	A9_S66	7	SAMN14389858	SRP253064	SRS6329647	0.08	Feacal samples	Infection, AB inject	Fec
SRX7924696	SRR11320465	Fec_B10_AB	B1017_S196	Langston-Fec-B10_17_S196	B10_S196	7	SAMN14389859	SRP253064	SRS6329648	7.99	Feacal samples	Infection, AB inject	Fec
SRX7924692	SRR11320469	Fec_A6_ZA	A657_S42	Langston-Fec-A6_57_S42	A6_S42	7	SAMN14389855	SRP253064	SRS6329644	0.08	Feacal samples	Infection, ZA inject	Fec
SRX7924701	SRR11320460	Fec_B6_ZA	B66_S164	Langston-Fec-B6_6_S164	B6_S164	7	SAMN14389864	SRP253064	SRS6329652	9.17	Feacal samples	Infection, ZA inject	Fec
SRX7924702	SRR11320459	Fec_B7_ZA	B731_S172	Langston-Fec-B7_31_S172	B7_S172	7	SAMN14389865	SRP253064	SRS6329653	5.41	Feacal samples	Infection, ZA inject	Fec
SRX7924703	SRR11320458	Fec_B8_ZA	B827_S180	Langston-Fec-B8_27_S180	B8_S180	7	SAMN14389866	SRP253064	SRS6329654	18.24	Feacal samples	Infection, ZA inject	Fec
SRX7924705	SRR11320456	Fec_B9_ZA	B938_S188	Langston-Fec-B9_38_S188	B9_S188	7	SAMN14389867	SRP253064	SRS6329656	62.83	Feacal samples	Infection, ZA inject	Fec
SRX7924697	SRR11320464	Fec_B1_NI	B128_S123	Langston-Fec-B1_28_S123	B1_S123	7	SAMN14389860	SRP253064	SRS6329649	125.15	Feacal samples	No infection	Fec
SRX7924712	SRR11320449	Fec_C6_IO	C666_S246	Langston-Fec-C6_66_S246	C6_S246	21	SAMN14389874	SRP253064	SRS6329663	1.16	Feacal samples	Infection only	Fec
SRX7924714	SRR11320447	Fec_C8_IO	C836_S262	Langston-Fec-C8_36_S262	C8_S262	21	SAMN14389876	SRP253064	SRS6329665	3.99	Feacal samples	Infection only	Fec
SRX7924707	SRR11320454	Fec_C1_AB	C149_S205	Langston-Fec-C1_49_S205	C1_S205	21	SAMN14389869	SRP253064	SRS6329659	104.12	Feacal samples	Infection, AB inject	Fec
SRX7924708	SRR11320453	Fec_C2_AB	C223_S213	Langston-Fec-C2_23_S213	C2_S213	21	SAMN14389870	SRP253064	SRS6329658	3.85	Feacal samples	Infection, AB inject	Fec
SRX7924709	SRR11320452	Fec_C3_AB	C310_S221	Langston-Fec-C3_10_S221	C3_S221	21	SAMN14389871	SRP253064	SRS6329660	20.18	Feacal samples	Infection, AB inject	Fec
SRX7924713	SRR11320448	Fec_C7_AB	C739_S254	Langston-Fec-C7_39_S254	C7_S254	21	SAMN14389875	SRP253064	SRS6329664	7.44	Feacal samples	Infection, AB inject	Fec
SRX7924716	SRR11320445	Fec_C9_AB	C919_S270	Langston-Fec-C9_19_S270	C9_S270	21	SAMN14389877	SRP253064	SRS6329667	0.08	Feacal samples	Infection, AB inject	Fec
SRX7924706	SRR11320455	Fec_C10_ZA	C105_S278	Langston-Fec-C10_5_S278	C10_S278	21	SAMN14389868	SRP253064	SRS6329657	12.98	Feacal samples	Infection, ZA inject	Fec
SRX7924710	SRR11320451	Fec_C4_ZA	C453_S229	Langston-Fec-C4_53_S229	C4_S229	21	SAMN14389872	SRP253064	SRS6329661	5.61	Feacal samples	Infection, ZA inject	Fec
SRX7924711	SRR11320450	Fec_C5_ZA	C529_S237	Langston-Fec-C5_29_S237	C5_S237	21	SAMN14389873	SRP253064	SRS6329662	3.19	Feacal samples	Infection, ZA inject	Fec
SRX7924719	SRR11320442	MLN_A4_IO	A42_S105	Langston-MLN-A4_2_S105	A4_S105	7	SAMN14389880	SRP253064	SRS6329670	9.3	Mesentary lymph node samples	Infection only	MLN
SRX7924591	SRR11320570	MLN_A5_IO	A520_S113	Langston-MLN-A5_20_S113	A5_S113	7	SAMN14389881	SRP253064	SRS6329543	4.47	Mesentary lymph node samples	Infection only	MLN
SRX7924600	SRR11320561	MLN_B3_IO	B313_S145	Langston-MLN-B3_13_S145	B3_S145	7	SAMN14389861	SRP253064	SRS6329552	0.17	Mesentary lymph node samples	Infection only	MLN
SRX7924601	SRR11320560	MLN_B4_IO	B458_S122	Langston-MLN-B4_58_S122	B4_S122	7	SAMN14389889	SRP253064	SRS6329553	4.02	Mesentary lymph node samples	Infection only	MLN
SRX7924602	SRR11320559	MLN_B5_IO	B551_S130	Langston-MLN-B5_51_S130	B5_S130	7	SAMN14389890	SRP253064	SRS6329554	4.1	Mesentary lymph node samples	Infection only	MLN
SRX7924717	SRR11320444	MLN_A10_AB	A1050_S73	Langston-MLN-A10_50_S73	A10_S73	7	SAMN14389878	SRP253064	SRS6329668	0.08	Mesentary lymph node samples	Infection, AB inject	MLN
SRX7924593	SRR11320568	MLN_A7_AB	A730_S217	Langston-MLN-A7_30_S217	A7_S217	7	SAMN14389883	SRP253064	SRS6329545	1.13	Mesentary lymph node samples	Infection, AB inject	MLN
SRX7924594	SRR11320567	MLN_A8_AB	A825_S57	Langston-MLN-A8_25_S57	A8_S57	7	SAMN14389884	SRP253064	SRS6329546	0.08	Mesentary lymph node samples	Infection, AB inject	MLN
SRX7924595	SRR11320566	MLN_A9_AB	A933_S65	Langston-MLN-A9_33_S65	A9_S65	7	SAMN14389885	SRP253064	SRS6329547	0.08	Mesentary lymph node samples	Infection, AB inject	MLN
SRX7924596	SRR11320565	MLN_B10_AB	B1017_S170	Langston-MLN-B10_17_S170	B10_S170	7	SAMN14389886	SRP253064	SRS6329548	0.09	Mesentary lymph node samples	Infection, AB inject	MLN
SRX7924592	SRR11320569	MLN_A6_ZA	A657_S41	Langston-MLN-A6_57_S41	A6_S41	7	SAMN14389882	SRP253064	SRS6329544	0.08	Mesentary lymph node samples	Infection, ZA inject	MLN
SRX7924603	SRR11320558	MLN_B6_ZA	B66_S138	Langston-MLN-B6_6_S138	B6_S138	7	SAMN14389891	SRP253064	SRS6329555	6.16	Mesentary lymph node samples	Infection, ZA inject	MLN
SRX7924604	SRR11320557	MLN_B7_ZA	B731_S146	Langston-MLN-B7_31_S146	B7_S146	7	SAMN14389892	SRP253064	SRS6329556	7	Mesentary lymph node samples	Infection, ZA inject	MLN
SRX7924605	SRR11320556	MLN_B8_ZA	B827_S154	Langston-MLN-B8_27_S154	B8_S154	7	SAMN14389893	SRP253064	SRS6329557	26.48	Mesentary lymph node samples	Infection, ZA inject	MLN
SRX7924606	SRR11320555	MLN_B9_ZA	B938_S162	Langston-MLN-B9_38_S162	B9_S162	7	SAMN14389894	SRP253064	SRS6329558	1.51	Mesentary lymph node samples	Infection, ZA inject	MLN
SRX7924718	SRR11320443	MLN_A3_NI	A352_S17	Langston-MLN-A3_52_S17	A3_S17	7	SAMN14389879	SRP253064	SRS6329669	0.08	Mesentary lymph node samples	No infection	MLN
SRX7924598	SRR11320563	MLN_B1_NI	B128_S81	Langston-MLN-B1_28_S81	B1_S81	7	SAMN14389887	SRP253064	SRS6329550	0.08	Mesentary lymph node samples	No infection	MLN
SRX7924599	SRR11320562	MLN_B2_NI	B254_S129	Langston-MLN-B2_54_S129	B2_S129	7	SAMN14389888	SRP253064	SRS6329551	0.1	Mesentary lymph node samples	No infection	MLN
SRX7924614	SRR11320547	MLN_C6_IO	C666_S198	Langston-MLN-C6_66_S198	C6_S198	21	SAMN14389901	SRP253064	SRS6329566	14.73	Mesentary lymph node samples	Infection only	MLN
SRX7924616	SRR11320545	MLN_C8_IO	C836_S320	Langston-MLN-C8_36_S320	C8_S320	21	SAMN14389903	SRP253064	SRS6329568	6.38	Mesentary lymph node samples	Infection only	MLN
SRX7924750	SRR11320411	MLN_D1_IO	D112_S339	Langston-MLN-D1_12_S339	D1_S339	21	SAMN14389906	SRP253064	SRS6329701	0.08	Mesentary lymph node samples	Infection only	MLN
SRX7924754	SRR11320407	MLN_D5_IO	D542_S375	Langston-MLN-D5_42_S375	D5_S375	21	SAMN14389910	SRP253064	SRS6329705	8.83	Mesentary lymph node samples	Infection only	MLN
SRX7924755	SRR11320406	MLN_D6_IO	D624_S384	Langston-MLN-D6_24_S312	D6_S312	21	SAMN14389911	SRP253064	SRS6329706	6.88	Mesentary lymph node samples	Infection only	MLN
SRX7924609	SRR11320552	MLN_C1_AB	C149_S177	Langston-MLN-C1_49_S177	C1_S177	21	SAMN14389896	SRP253064	SRS6329561	6.38	Mesentary lymph node samples	Infection, AB inject	MLN
SRX7924610	SRR11320551	MLN_C2_AB	C223_S186	Langston-MLN-C2_23_S186	C2_S186	21	SAMN14389897	SRP253064	SRS6329562	5.8	Mesentary lymph node samples	Infection, AB inject	MLN
SRX7924611	SRR11320550	MLN_C3_AB	C310_S291	Langston-MLN-C3_10_S291	C3_S291	21	SAMN14389898	SRP253064	SRS6329563	5.31	Mesentary lymph node samples	Infection, AB inject	MLN
SRX7924615	SRR11320546	MLN_C7_AB	C739_S311	Langston-MLN-C7_39_S311	C7_S311	21	SAMN14389902	SRP253064	SRS6329567	4.37	Mesentary lymph node samples	Infection, AB inject	MLN
SRX7924617	SRR11320544	MLN_C9_AB	C919_S321	Langston-MLN-C9_19_S321	C9_S321	21	SAMN14389904	SRP253064	SRS6329569	2.24	Mesentary lymph node samples	Infection, AB inject	MLN
SRX7924607	SRR11320554	MLN_C10_ZA	C105_S330	Langston-MLN-C10_5_S330	C10_S330	21	SAMN14389895	SRP253064	SRS6329559	6.64	Mesentary lymph node samples	Infection, ZA inject	MLN
SRX7924612	SRR11320549	MLN_C4_ZA	C453_S300	Langston-MLN-C4_53_S300	C4_S300	21	SAMN14389899	SRP253064	SRS6329564	5.26	Mesentary lymph node samples	Infection, ZA inject	MLN
SRX7924613	SRR11320548	MLN_C5_ZA	C529_S101	Langston-MLN-C5_29_S101	C5_S101	21	SAMN14389900	SRP253064	SRS6329565	7	Mesentary lymph node samples	Infection, ZA inject	MLN
SRX7924751	SRR11320410	MLN_D2_ZA	D246_S348	Langston-MLN-D2_46_S348	D2_S348	21	SAMN14389907	SRP253064	SRS6329702	6.45	Mesentary lymph node samples	Infection, ZA inject	MLN
SRX7924753	SRR11320408	MLN_D4_ZA	D443_S366	Langston-MLN-D4_43_S366	D4_S366	21	SAMN14389909	SRP253064	SRS6329704	5.37	Mesentary lymph node samples	Infection, ZA inject	MLN
SRX7924618	SRR11320543	MLN_D10_NI	D1032_S68	Langston-MLN-D10_32_S68	D10_S68	21	SAMN14389905	SRP253064	SRS6329570	0.08	Mesentary lymph node samples	No infection	MLN
SRX7924752	SRR11320409	MLN_D3_NI	D334_S357	Langston-MLN-D3_34_S357	D3_S357	21	SAMN14389908	SRP253064	SRS6329703	5.56	Mesentary lymph node samples	No infection	MLN
SRX7924756	SRR11320405	MLN_D8_NI	D845_S51	Langston-MLN-D8_45_S51	D8_S51	21	SAMN14389912	SRP253064	SRS6329707	0.07	Mesentary lymph node samples	No infection	MLN
SRX7924765	SRR11320396	RF_B3_IO	B313_S123	Langston-RF-B3_13_S123	B3_S123	7	SAMN14389920	SRP253064	SRS6329716	6.75	Rumen fluid samples	Infection only	RF
SRX7924766	SRR11320395	RF_B4_IO	B458_S131	Langston-RF-B4_58_S131	B4_S131	7	SAMN14389921	SRP253064	SRS6329717	15.13	Rumen fluid samples	Infection only	RF
SRX7924767	SRR11320394	RF_B5_IO	B551_S139	Langston-RF-B5_51_S139	B5_S139	7	SAMN14389922	SRP253064	SRS6329718	22.38	Rumen fluid samples	Infection only	RF
SRX7924757	SRR11320404	RF_A10_AB	A1050_S12	Langston-RF-A10_50_S12	A10_S12	7	SAMN14389913	SRP253064	SRS6329708	0.08	Rumen fluid samples	Infection, AB inject	RF
SRX7924762	SRR11320399	RF_A8_AB	A825_S61	Langston-RF-A8_25_S61	A8_S61	7	SAMN14389917	SRP253064	SRS6329713	0.08	Rumen fluid samples	Infection, AB inject	RF
SRX7924763	SRR11320398	RF_B10_AB	B1017_S180	Langston-RF-B10_17_S180	B10_S180	7	SAMN14389918	SRP253064	SRS6329714	33.83	Rumen fluid samples	Infection, AB inject	RF
SRX7924768	SRR11320393	RF_B6_ZA	B66_S148	Langston-RF-B6_6_S148	B6_S148	7	SAMN14389923	SRP253064	SRS6329719	11	Rumen fluid samples	Infection, ZA inject	RF
SRX7924769	SRR11320392	RF_B7_ZA	B731_S156	Langston-RF-B7_31_S156	B7_S156	7	SAMN14389924	SRP253064	SRS6329720	12.95	Rumen fluid samples	Infection, ZA inject	RF
SRX7924770	SRR11320391	RF_B8_ZA	B827_S164	Langston-RF-B8_27_S164	B8_S164	7	SAMN14389925	SRP253064	SRS6329722	15.67	Rumen fluid samples	Infection, ZA inject	RF
SRX7924772	SRR11320389	RF_B9_ZA	B938_S172	Langston-RF-B9_38_S172	B9_S172	7	SAMN14389926	SRP253064	SRS6329723	17.36	Rumen fluid samples	Infection, ZA inject	RF
SRX7924758	SRR11320403	RF_A1_NI	A18_S368	Langston-RF-A1_8_S368	A1_S368	7	SAMN14389914	SRP253064	SRS6329709	11.55	Rumen fluid samples	No infection	RF
SRX7924759	SRR11320402	RF_A2_NI	A244_S16	Langston-RF-A2_44_S16	A2_S16	7	SAMN14389915	SRP253064	SRS6329710	0.08	Rumen fluid samples	No infection	RF
SRX7924761	SRR11320400	RF_A3_NI	A352_S23	Langston-RF-A3_52_S23	A3_S23	7	SAMN14389916	SRP253064	SRS6329712	0.08	Rumen fluid samples	No infection	RF
SRX7924764	SRR11320397	RF_B2_NI	B254_S11	Langston-RF-B2_54_S11	B2_S11	7	SAMN14389919	SRP253064	SRS6329715	0.08	Rumen fluid samples	No infection	RF
SRX7924667	SRR11320494	RF_C6_IO	C666_S230	Langston-RF-C6_66_S230	C6_S230	21	SAMN14389933	SRP253064	SRS6329619	9.88	Rumen fluid samples	Infection only	RF
SRX7924669	SRR11320492	RF_C8_IO	C836_S246	Langston-RF-C8_36_S246	C8_S246	21	SAMN14389935	SRP253064	SRS6329621	11.86	Rumen fluid samples	Infection only	RF
SRX7924673	SRR11320488	RF_D1_IO	D112_S271	Langston-RF-D1_12_S271	D1_S271	21	SAMN14389938	SRP253064	SRS6329625	25.52	Rumen fluid samples	Infection only	RF
SRX7924677	SRR11320484	RF_D5_IO	D542_S303	Langston-RF-D5_42_S303	D5_S303	21	SAMN14389942	SRP253064	SRS6329629	24.47	Rumen fluid samples	Infection only	RF
SRX7924678	SRR11320483	RF_D6_IO	D624_S312	Langston-RF-D6_24_S312	D6_S312	21	SAMN14389943	SRP253064	SRS6329632	5.05	Rumen fluid samples	Infection only	RF
SRX7924774	SRR11320387	RF_C1_AB	C149_S189	Langston-RF-C1_49_S189	C1_S189	21	SAMN14389928	SRP253064	SRS6329725	14.42	Rumen fluid samples	Infection, AB inject	RF
SRX7924775	SRR11320386	RF_C2_AB	C223_S197	Langston-RF-C2_23_S197	C2_S197	21	SAMN14389929	SRP253064	SRS6329726	9.69	Rumen fluid samples	Infection, AB inject	RF
SRX7924664	SRR11320497	RF_C3_AB	C310_S205	Langston-RF-C3_10_S205	C3_S205	21	SAMN14389930	SRP253064	SRS6329616	8.16	Rumen fluid samples	Infection, AB inject	RF
SRX7924668	SRR11320493	RF_C7_AB	C739_S238	Langston-RF-C7_39_S238	C7_S238	21	SAMN14389934	SRP253064	SRS6329620	11.85	Rumen fluid samples	Infection, AB inject	RF
SRX7924671	SRR11320490	RF_C9_AB	C919_S254	Langston-RF-C9_19_S254	C9_S254	21	SAMN14389936	SRP253064	SRS6329623	26.4	Rumen fluid samples	Infection, AB inject	RF
SRX7924773	SRR11320388	RF_C10_ZA	C105_S262	Langston-RF-C10_5_S262	C10_S262	21	SAMN14389927	SRP253064	SRS6329724	0.08	Rumen fluid samples	Infection, ZA inject	RF
SRX7924665	SRR11320496	RF_C4_ZA	C453_S213	Langston-RF-C4_53_S213	C4_S213	21	SAMN14389931	SRP253064	SRS6329617	11.83	Rumen fluid samples	Infection, ZA inject	RF
SRX7924666	SRR11320495	RF_C5_ZA	C529_S221	Langston-RF-C5_29_S221	C5_S221	21	SAMN14389932	SRP253064	SRS6329618	10.31	Rumen fluid samples	Infection, ZA inject	RF
SRX7924674	SRR11320487	RF_D2_ZA	D246_S279	Langston-RF-D2_46_S279	D2_S279	21	SAMN14389939	SRP253064	SRS6329626	13.44	Rumen fluid samples	Infection, ZA inject	RF
SRX7924676	SRR11320485	RF_D4_ZA	D443_S295	Langston-RF-D4_43_S295	D4_S295	21	SAMN14389941	SRP253064	SRS6329628	9.92	Rumen fluid samples	Infection, ZA inject	RF
SRX7924672	SRR11320489	RF_D10_NI	D1032_S344	Langston-RF-D10_32_S344	D10_S344	21	SAMN14389937	SRP253064	SRS6329624	19.16	Rumen fluid samples	No infection	RF
SRX7924675	SRR11320486	RF_D3_NI	D334_S287	Langston-RF-D3_34_S287	D3_S287	21	SAMN14389940	SRP253064	SRS6329627	2.93	Rumen fluid samples	No infection	RF
SRX7924679	SRR11320482	RF_D7_NI	D762_S320	Langston-RF-D7_62_S320	D7_S320	21	SAMN14389944	SRP253064	SRS6329630	10.68	Rumen fluid samples	No infection	RF
SRX7924680	SRR11320481	RF_D8_NI	D845_S328	Langston-RF-D8_45_S328	D8_S328	21	SAMN14389945	SRP253064	SRS6329631	13.44	Rumen fluid samples	No infection	RF
SRX7924682	SRR11320479	RF_D9_NI	D914_S336	Langston-RF-D9_14_S336	D9_S336	21	SAMN14389946	SRP253064	SRS6329634	10.97	Rumen fluid samples	No infection	RF
		MLN_D6		Langston_MLN_D6_S384		21
		Fec_D7		Langston_Fec_D7_S336		21
		Fec_D5		Langston_Fec_D5_S319		21
		Fec_D1		Langston_Fec_D1_S287		21
