# Supplementary material for: What Metagenomics Reveals of Microbial Populations in a Host-Parasite Relationship Between Alpine Goats and <em>Haemonchus contortus</em>
Source: Preprints.org preprint supplement (doi:10.20944/preprints202312.1796.v1), 2023-12-25
Supplement: Supplementary file 5 [file bSupplementary_Chart_III.xlsx]

## Sheet: Classification
taxon	Bacteroidota	Firmicutes	Actinobacteriota	Proteobacteria	Bacteria_unclassified	Myxococcota	Desulfobacterota	Gemmatimonadota	Chloroflexi	Verrucomicrobiota	Spirochaetota	Acidobacteriota	Campylobacterota	Nitrospirota	Planctomycetota	Methylomirabilota	Patescibacteria	RCP2-54	Cyanobacteria	MBNT15	Fibrobacterota	NB1-j	Bdellovibrionota	Synergistota	Fusobacteriota	Elusimicrobiota	Hydrogenedentes	Dependentiae	Latescibacterota	Entotheonellaeota	Armatimonadota	SAR324_clade(Marine_group_B)	Deferribacterota	WPS-2	Dadabacteria	GAL15	Zixibacteria	Sumerlaeota	Deinococcota	Abditibacteriota	Deferrisomatota	Bacteria_ph	Calditrichota	Nitrospinota	Bacteria	Percentage
Abo_A10_AB_7	27	15	13	2	34	0	4	1	4	1	0	1	1	2	1	0	0	0	0	0	1	0	0	0	0	0	0	0	0	0	0	0	0	0	0	0	0	0	0	0	0	0	0	0	107	0.0019
Abo_A9_AB_7	57	58	31	21	81	11	5	3	5	3	1	5	1	5	1	0	1	0	0	3	1	0	0	0	0	0	0	0	0	0	0	0	0	0	0	0	0	0	0	0	0	0	0	0	293	0.0053
Abo_B10_AB_7	9184	7266	3330	2489	2519	884	633	296	478	537	143	663	262	466	166	91	87	106	40	103	5	49	57	5	5	18	0	24	15	16	8	0	6	0	0	0	1	0	0	0	0	0	0	0	29952	0.5421
Abo_A4_IO_7	9999	10471	6007	5117	3970	1494	1072	877	871	512	147	814	365	738	339	249	57	186	18	209	28	112	75	16	5	18	7	26	31	24	7	0	5	0	0	0	0	0	0	0	0	0	0	0	43866	0.7939
Abo_A5_IO_7	11622	7752	10369	12168	5984	2410	1566	2245	1844	702	222	1508	232	1160	473	409	99	337	35	312	18	324	104	23	4	42	12	48	43	60	7	2	6	1	3	0	0	0	0	0	0	0	0	0	62146	1.1247
Abo_B3_IO_7	11363	10646	7188	6087	4588	1792	1456	1321	1257	919	689	1151	326	794	445	309	92	177	53	185	13	191	72	23	5	42	3	37	42	33	2	0	6	0	0	0	0	0	0	0	0	0	0	0	51307	0.9285
Abo_B4_IO_7	9249	9027	7462	8407	4824	1867	1302	1550	1126	530	208	982	235	714	325	277	90	187	39	216	14	165	84	24	7	15	2	19	14	35	9	0	2	0	1	1	0	0	0	0	0	0	0	0	49009	0.8869
Abo_B5_IO_7	24775	11640	12348	9283	7226	2684	1929	1773	2011	1254	1079	1862	160	1488	426	430	143	468	105	205	124	192	146	33	4	79	10	30	63	64	3	0	8	1	0	0	0	0	0	0	0	1	0	0	82047	1.4848
Abo_A1_NI_7	13330	11887	8714	7478	4483	1868	1230	1479	1024	690	555	1176	422	765	454	267	138	302	60	171	108	202	118	11	6	51	2	26	23	41	8	4	1	0	0	1	0	0	0	0	0	0	0	0	57095	1.0333
Abo_A2_NI_7	23703	12228	5895	7037	3724	1361	981	1022	1049	749	683	779	221	434	277	152	61	269	58	157	58	88	76	18	6	45	6	13	11	26	10	0	2	0	1	1	4	0	0	0	0	1	0	0	61206	1.1077
Abo_B1_NI_7	19630	5900	2649	2691	1895	508	432	424	332	385	432	376	68	203	97	69	36	64	36	63	75	66	25	45	2	8	0	5	9	13	0	0	0	0	1	1	0	1	0	0	0	0	0	0	36541	0.6613
Abo_B2_NI_7	11519	7172	6776	6059	3463	1280	866	993	1174	573	552	1025	214	606	291	264	93	186	92	153	205	118	54	28	4	44	18	38	8	30	9	0	9	0	0	1	0	0	0	0	0	0	0	0	43917	0.7948
Abo_A6_ZA_7	277	338	155	136	148	25	27	15	16	17	3	19	8	19	7	1	1	0	0	10	4	4	1	0	0	0	0	0	0	0	0	0	0	0	0	0	0	0	0	0	0	0	0	0	1231	0.0223
Abo_B6_ZA_7	7435	7346	4455	3778	2891	1061	786	678	807	410	144	823	259	529	226	176	73	169	18	143	7	82	58	5	5	9	5	17	15	26	4	0	5	0	0	0	0	0	0	0	0	0	0	0	32445	0.5872
Abo_B7_ZA_7	5822	4184	3839	3639	2423	902	665	721	650	397	216	507	155	365	208	127	41	109	23	100	17	90	40	19	4	4	7	10	12	11	2	1	7	0	0	0	0	1	0	0	0	0	0	0	25318	0.4582
Abo_B8_ZA_7	5400	3581	5087	4052	3610	1383	1018	1079	849	456	36	766	179	593	280	187	84	50	13	215	3	166	35	8	1	4	7	3	3	9	10	0	0	0	0	0	0	1	0	0	1	0	0	0	29169	0.5279
Abo_B9_ZA_7	231	312	98	77	135	14	13	8	13	7	2	16	20	13	5	1	3	0	0	2	0	2	0	0	0	0	0	0	0	1	0	0	0	0	0	0	0	0	0	0	0	0	0	0	973	0.0176
Abo_C1_AB_21	9653	2301	6282	5218	3693	1261	819	1404	932	359	541	696	19	576	188	191	54	112	30	151	114	139	56	23	0	19	1	4	19	25	7	0	0	0	0	0	0	0	0	0	0	0	1	1	34889	0.6314
Abo_C2_AB_21	3	4	2	1	3	1	0	0	0	0	0	0	0	0	0	0	0	0	0	0	0	0	0	0	0	0	0	0	0	0	0	0	0	0	0	0	0	0	0	0	0	0	0	0	14	0.0003
Abo_C7_AB_21	256	111	162	88	131	31	18	22	13	16	1	31	4	15	5	3	4	4	2	3	0	2	0	0	0	0	0	0	0	0	0	0	0	0	0	0	0	0	0	0	0	0	0	0	922	0.0167
Abo_C9_AB_21	19	18	13	5	11	0	0	4	3	1	1	0	0	1	0	1	0	0	0	0	0	0	0	0	0	0	0	0	0	0	0	0	0	0	0	0	0	0	0	0	0	0	0	0	77	0.0014
Abo_C6_IO_21	15	5	8	5	8	0	0	1	0	0	0	0	0	1	0	0	0	0	0	0	0	0	0	0	0	0	0	0	0	0	0	0	0	0	0	0	0	0	0	0	0	0	0	0	43	0.0008
Abo_C8_IO_21	2931	2324	1550	980	1058	317	250	162	112	131	40	259	72	168	72	37	33	23	8	30	4	26	13	5	3	4	0	2	8	11	1	0	3	0	0	0	0	0	0	0	0	0	0	0	10637	0.1925
Abo_D1_IO_21	1198	202	672	313	574	169	109	100	39	46	2	113	6	76	30	9	9	10	1	17	0	5	8	0	0	3	0	1	0	1	2	0	0	0	0	0	0	0	0	0	0	0	0	0	3715	0.0672
Abo_D5_IO_21	3	6	5	0	2	0	0	0	0	1	0	1	0	0	0	0	0	0	0	0	0	0	0	0	0	0	0	0	0	0	0	0	0	0	0	0	0	0	0	0	0	0	0	0	18	0.0003
Abo_D6_IO_21	63	36	43	20	116	5	5	2	5	1	2	2	0	1	2	0	1	2	1	1	0	0	0	1	0	1	0	0	0	0	0	0	0	0	0	0	0	0	0	0	0	0	0	0	310	0.0056
Abo_D10_NI_21	14932	8070	6301	4040	3751	1447	954	934	735	562	352	953	200	669	243	133	76	198	43	128	73	95	51	14	1	16	6	26	15	27	4	0	2	0	0	0	2	0	0	0	0	0	0	0	45053	0.8153
Abo_D3_NI_21	10877	3111	9275	7726	4693	1773	1182	1754	1006	452	154	1096	74	911	269	182	43	253	36	173	26	180	61	18	0	17	9	14	21	39	6	1	3	0	0	0	0	0	0	0	1	0	0	0	45436	0.8223
Abo_D9_NI_21	5437	4475	2860	2127	1847	669	432	417	363	271	175	442	110	294	121	88	25	79	14	51	11	72	21	5	0	9	2	3	15	4	2	3	8	0	0	0	0	0	0	0	0	0	0	0	20452	0.3701
Abo_C10_ZA_21	6	5	5	3	1	0	0	0	0	1	0	0	0	1	0	0	0	0	0	0	0	0	0	0	0	0	0	0	0	0	0	0	0	0	0	0	0	0	0	0	0	0	0	0	22	0.0004
Abo_C4_ZA_21	12233	6510	5784	5863	3426	1363	840	1180	1098	679	595	916	109	734	265	262	97	164	65	131	156	141	62	32	4	20	11	16	1	31	1	4	4	0	0	0	0	0	0	0	0	0	0	0	42797	0.7745
Abo_C5_ZA_21	1	0	0	0	0	0	0	0	0	0	0	0	0	0	0	0	0	0	0	0	0	0	0	0	0	0	0	0	0	0	0	0	0	0	0	0	0	0	0	0	0	0	0	0	1	0
Abo_D2_ZA_21	9815	3419	6400	4004	3815	1500	965	993	717	497	58	885	108	642	233	138	79	128	38	140	8	94	61	8	8	9	0	11	20	15	2	0	2	0	0	0	0	0	0	0	0	0	0	1	34813	0.63
Abo_D4_ZA_21	34	42	13	11	34	1	4	1	2	1	2	2	0	2	0	0	0	0	0	0	0	0	0	0	0	0	0	0	0	0	0	0	0	0	0	0	0	0	0	0	0	0	0	0	149	0.0027
AF_E10_AB_7	26988	6478	29	15	214	4	20	2	1	148	930	0	1	1	0	0	26	0	12	0	84	0	0	4	0	3	0	0	0	0	0	0	0	0	0	0	0	0	0	0	0	0	0	0	34960	0.6327
AF_E7_AB_7	45387	12221	190	161	678	47	41	16	53	368	826	12	3	13	5	5	44	2	8	0	21	3	2	1	0	3	0	0	0	1	0	0	0	0	0	0	0	0	0	0	0	0	0	0	60111	1.0878
AF_E8_AB_7	8	1	0	0	1	0	0	0	0	0	0	0	0	0	0	0	0	0	0	0	0	0	0	0	0	0	0	0	0	0	0	0	0	0	0	0	0	0	0	0	0	0	0	0	10	0.0002
AF_F10_AB_7	22067	5522	110	65	362	4	20	4	16	199	847	2	1	2	2	0	41	0	37	0	20	0	0	1	0	12	0	0	0	0	0	0	0	0	0	0	0	0	0	0	0	0	0	0	29334	0.5309
AF_E4_IO_7	16322	12808	108	95	251	17	13	9	22	84	240	15	0	6	6	2	60	2	3	3	6	0	2	1	0	10	0	0	0	0	1	0	0	0	0	0	0	0	0	0	0	0	0	0	30086	0.5445
AF_E5_IO_7	12047	14225	278	214	533	62	52	17	63	191	624	38	1	31	13	3	1064	1	13	2	21	2	3	10	0	28	0	0	0	0	0	1	0	0	0	0	0	0	0	0	0	0	0	0	29537	0.5345
AF_F3_IO_7	21225	5468	67	54	187	4	36	8	16	97	229	3	0	5	5	0	45	4	5	1	25	0	0	3	0	2	0	0	0	0	1	0	0	0	0	0	0	0	0	0	0	0	0	0	27490	0.4975
AF_F5_IO_7	41835	5784	80	73	200	11	12	5	24	221	332	10	0	4	4	3	161	0	4	0	12	1	0	0	0	8	0	0	0	0	0	0	0	0	0	0	0	0	0	0	0	0	0	0	48784	0.8829
AF_E1_NI_7	4	2	0	0	0	0	0	0	0	0	0	0	0	0	0	0	0	0	0	0	2	0	0	0	0	0	0	0	0	0	0	0	0	0	0	0	0	0	0	0	0	0	0	0	8	0.0001
AF_E2_NI_7	36	17	10	3	35	4	2	4	2	1	0	2	1	2	1	0	1	0	0	0	0	0	0	0	0	0	0	0	0	0	0	0	0	0	0	0	0	0	0	0	0	0	0	0	121	0.0022
AF_E3_NI_7	86	47	15	5	26	2	5	0	2	0	11	2	0	0	1	0	0	0	4	0	1	1	0	0	0	1	0	0	0	0	0	0	0	0	0	0	0	0	0	0	0	0	0	0	209	0.0038
AF_F1_NI_7	4	1	0	0	2	0	0	0	0	0	0	0	0	0	0	0	0	0	0	0	0	0	0	0	0	0	0	0	0	0	0	0	0	0	0	0	0	0	0	0	0	0	0	0	7	0.0001
AF_F2_NI_7	9854	3877	3188	251	253	30	29	16	40	158	910	12	0	6	2	4	40	0	83	0	465	1	1	5	0	27	0	0	0	0	0	0	0	0	0	0	0	0	0	0	0	0	0	0	19252	0.3484
AF_E6_ZA_7	21058	3536	1006	193	213	22	54	16	65	136	794	6	0	5	5	2	37	1	26	0	193	0	2	5	0	7	0	0	0	0	1	0	0	0	0	0	0	0	0	0	0	0	0	0	27383	0.4956
AF_F6_ZA_7	27983	12372	252	157	268	44	46	38	50	299	144	30	4	29	17	6	23	7	13	4	6	0	8	0	0	0	0	0	0	1	0	0	0	0	0	0	0	0	0	0	0	0	0	0	41801	0.7565
AF_F7_ZA_7	27617	5506	267	96	344	29	50	22	24	164	851	24	1	22	7	2	71	2	13	1	26	2	1	5	0	2	0	0	0	0	0	0	0	0	0	0	0	0	0	0	0	0	0	0	35149	0.6361
AF_F8_ZA_7	55626	22729	3390	733	912	106	168	73	184	429	3351	85	10	54	21	17	29	12	77	8	230	8	9	28	0	40	0	0	5	0	0	0	0	1	0	0	0	0	0	0	0	0	0	0	88335	1.5986
AF_G1_AB_21	21398	8461	1552	694	831	204	210	108	718	498	3625	119	3	55	35	22	569	24	218	13	460	9	4	9	4	48	1	0	3	1	2	0	0	1	0	0	0	0	0	0	0	0	0	0	39899	0.7221
AF_G2_AB_21	12102	6156	515	244	240	33	77	8	147	119	1737	19	5	9	13	3	32	2	83	0	159	4	1	8	0	13	0	0	0	0	1	0	0	0	0	0	0	0	0	0	0	0	0	0	21730	0.3933
AF_G3_AB_21	15622	7853	783	88	514	15	36	8	90	334	2186	6	2	3	2	0	14	0	49	0	294	3	0	3	0	25	0	0	0	0	0	0	0	0	0	0	0	0	0	0	0	0	0	0	27930	0.5055
AF_G7_AB_21	18170	13229	317	284	497	59	71	39	61	467	705	38	3	23	18	4	320	6	16	3	22	2	10	4	0	20	1	0	0	0	0	0	0	0	0	0	0	0	0	0	0	0	0	0	34389	0.6223
AF_G6_IO_21	27238	10189	851	453	467	117	92	63	108	537	1230	57	6	43	10	16	634	12	52	4	171	6	5	12	1	31	2	0	3	0	2	2	0	2	0	0	0	0	0	0	0	0	0	0	42416	0.7676
AF_G8_IO_21	9214	8054	242	237	1101	31	38	22	153	168	2030	20	5	13	14	2	141	1	20	3	48	0	3	7	0	10	1	1	0	1	0	0	0	0	0	0	0	0	0	0	0	0	0	0	21580	0.3905
AF_H1_IO_21	24715	26044	894	784	1390	166	128	107	248	664	2347	90	2	65	35	16	1560	10	65	0	97	19	6	19	0	28	1	1	1	4	0	0	0	0	0	0	0	0	0	0	0	0	0	0	59506	1.0769
AF_H5_IO_21	22138	20845	2215	1599	1244	322	373	300	548	962	2792	208	21	119	88	36	75	54	239	5	340	3	16	45	0	11	2	5	5	2	0	3	0	0	0	0	0	0	0	0	0	0	0	0	54615	0.9884
AF_H6_IO_21	15577	9372	1204	479	593	115	104	62	181	144	1315	75	8	45	15	9	93	7	63	4	249	1	4	13	0	22	3	2	1	4	0	0	0	0	0	0	0	0	0	0	0	0	0	0	29764	0.5386
AF_H10_NI_21	10089	9762	1005	306	600	83	61	47	103	262	937	42	2	23	16	10	127	3	72	6	77	2	6	12	0	33	1	1	0	0	0	0	0	0	0	0	0	0	0	0	0	0	0	0	23688	0.4287
AF_H3_NI_21	52459	28400	6805	1474	1396	235	310	154	444	942	5753	130	39	88	49	29	128	19	284	9	439	9	12	146	1	96	6	3	2	1	1	0	0	1	0	0	0	0	0	1	0	0	0	0	99865	1.8073
AF_H7_NI_21	30532	11420	3709	769	436	49	130	30	166	557	1572	36	8	12	13	6	89	4	98	4	1136	0	1	19	0	66	1	0	0	2	0	0	0	0	0	0	0	0	0	0	0	0	0	0	50865	0.9205
AF_H8_NI_21	10847	6493	1235	1021	612	254	190	208	236	239	428	125	1	106	48	26	63	16	60	15	47	13	12	15	0	6	0	8	3	5	4	0	0	0	0	0	0	1	0	0	0	0	0	0	22337	0.4042
AF_H9_NI_21	22475	15823	4623	631	1052	112	100	38	168	784	2267	44	6	44	18	6	72	6	100	3	241	1	5	19	0	63	0	0	4	1	0	0	0	0	0	0	0	0	0	0	0	0	0	0	48706	0.8814
AF_G10_ZA_21	1	0	0	0	0	0	0	0	0	0	0	0	0	0	0	0	0	0	0	0	0	0	0	0	0	0	0	0	0	0	0	0	0	0	0	0	0	0	0	0	0	0	0	0	1	0
AF_G4_ZA_21	31179	12925	1019	803	321	57	82	33	148	274	1640	16	2	17	13	5	121	7	126	2	379	1	4	11	0	64	0	0	0	1	1	0	0	0	0	0	0	0	0	0	0	0	0	0	49251	0.8913
AF_G5_ZA_21	19502	9792	2300	430	324	12	29	11	51	263	415	13	2	6	4	2	36	1	72	0	261	3	0	13	0	61	2	0	0	1	0	0	0	0	0	0	0	0	0	0	0	0	0	0	33606	0.6082
AF_H2_ZA_21	29150	12432	495	538	500	143	124	93	115	868	1201	69	5	57	32	11	181	4	20	4	249	3	6	52	1	8	2	0	1	2	0	0	0	0	0	0	0	0	0	0	0	0	0	0	46366	0.8391
AF_H4_ZA_21	9	10	0	1	0	0	0	0	0	0	1	0	0	0	0	0	0	0	0	0	0	0	0	0	0	0	0	0	0	0	0	0	0	0	0	0	0	0	0	0	0	0	0	0	21	0.0004
ALN_E9_AB_7	0	0	0	0	0	0	0	0	0	0	0	1	0	0	0	0	0	0	0	0	0	0	0	0	0	0	0	0	0	0	0	0	0	0	0	0	0	0	0	0	0	0	0	0	1	0
ALN_F10_AB_7	2099	431	1549	1887	1465	382	326	387	260	107	2	348	28	191	58	107	19	41	11	41	1	27	18	13	2	0	4	4	9	3	3	0	0	0	0	0	0	0	0	0	0	0	0	0	9823	0.1778
ALN_E4_IO_7	1098	408	1054	970	973	175	161	201	156	83	9	165	25	133	36	37	15	17	37	36	2	32	18	1	5	3	16	0	2	0	0	0	0	0	0	0	0	0	0	0	0	0	0	0	5868	0.1062
ALN_E5_IO_7	1430	490	1327	1375	1149	303	260	248	207	143	8	238	10	153	51	46	4	41	12	32	2	27	1	6	0	13	0	0	1	2	1	0	0	0	0	0	0	0	0	0	0	0	0	0	7580	0.1372
ALN_F3_IO_7	2029	625	1653	1942	1589	320	289	303	215	108	34	286	14	172	57	56	33	28	10	28	4	35	3	17	0	5	0	13	12	16	1	0	0	0	0	0	0	0	0	0	0	0	0	0	9897	0.1791
ALN_F4_IO_7	395	162	417	361	370	83	90	68	61	21	9	86	2	54	11	14	3	8	16	10	7	14	2	0	0	0	0	0	0	5	1	0	0	0	0	0	0	0	0	0	0	0	0	0	2270	0.0411
ALN_F5_IO_7	191	120	92	47	80	18	22	5	9	15	8	17	7	9	7	3	2	1	1	2	0	1	1	1	0	1	0	0	0	0	0	0	0	0	0	0	0	0	0	0	0	0	0	0	660	0.0119
ALN_F1_NI_7	760	385	156	251	95	36	74	27	19	65	16	8	1	8	0	2	2	0	0	29	7	0	0	0	0	2	0	18	0	2	0	0	0	0	0	0	0	0	0	0	0	0	0	0	1963	0.0355
ALN_F2_NI_7	2	0	1	1	3	4	0	0	0	0	0	1	0	0	0	0	0	0	0	0	0	0	0	0	0	0	0	0	0	0	0	0	0	0	0	0	0	0	0	0	0	0	0	0	12	0.0002
ALN_F6_ZA_7	1689	573	1405	1683	1223	340	254	244	157	81	29	268	18	154	62	50	15	34	7	28	3	16	6	9	0	8	0	13	4	2	5	0	0	0	0	0	0	0	0	0	0	0	0	0	8380	0.1517
ALN_F7_ZA_7	881	332	963	908	867	182	224	165	137	89	10	187	16	90	35	53	9	12	15	37	1	40	1	0	0	0	0	2	6	9	0	0	0	0	0	0	0	0	0	0	0	0	0	0	5271	0.0954
ALN_F8_ZA_7	736	215	466	513	437	95	82	77	82	31	7	82	5	52	14	23	4	10	9	4	2	7	2	4	0	0	0	2	1	3	0	0	0	0	0	0	0	0	0	0	0	0	0	0	2965	0.0537
ALN_F9_ZA_7	854	146	441	644	379	126	68	87	59	56	3	95	5	38	13	12	0	14	5	8	1	20	0	0	0	3	0	1	4	3	1	0	0	0	0	0	0	0	0	0	0	0	0	0	3086	0.0558
ALN_G2_AB_21	1	0	0	1	0	0	0	0	0	0	0	0	0	0	0	0	0	0	0	0	0	0	0	0	0	0	0	0	0	0	0	0	0	0	0	0	0	0	0	0	0	0	0	0	2	0
ALN_G3_AB_21	0	0	0	0	1	0	0	0	0	0	0	0	0	0	0	0	0	0	0	0	0	0	0	0	0	0	0	0	0	0	0	0	0	0	0	0	0	0	0	0	0	0	0	0	1	0
ALN_G9_AB_21	1	2	0	1	0	0	0	1	0	0	0	0	0	0	0	0	0	0	0	0	0	0	0	0	0	0	0	0	0	0	0	0	0	0	0	0	0	0	0	0	0	0	0	0	5	0.0001
ALN_G6_IO_21	647	148	572	485	559	155	123	128	56	53	4	112	11	54	16	28	4	16	3	14	0	25	11	6	0	0	1	0	1	1	4	0	0	0	0	0	0	0	0	0	0	0	0	0	3237	0.0586
ALN_G8_IO_21	1359	469	1528	1763	1418	258	294	423	308	101	9	337	27	146	129	101	12	50	28	38	4	25	16	11	2	2	13	7	0	3	6	0	0	0	0	0	0	0	0	0	0	0	0	0	8887	0.1608
ALN_H1_IO_21	519	561	196	363	49	45	12	9	29	28	7	5	1	3	0	8	1	0	16	0	4	0	0	0	0	3	0	7	0	0	0	0	8	0	0	0	0	0	1	0	0	0	0	0	1875	0.0339
ALN_H5_IO_21	1280	586	1233	1535	1181	310	216	191	242	94	17	216	6	107	54	66	6	39	17	34	4	34	9	10	0	0	0	4	0	2	0	0	0	0	0	0	0	0	0	0	0	0	0	0	7493	0.1356
ALN_H6_IO_21	571	178	562	627	425	142	167	124	113	49	8	125	3	61	28	16	6	10	7	11	3	11	0	4	0	0	0	5	0	5	0	0	0	0	0	0	0	0	0	0	0	0	0	0	3261	0.059
ALN_H3_NI_21	1216	426	1271	1659	1086	299	226	267	213	75	12	235	23	157	89	51	18	32	7	20	3	33	6	14	1	2	0	2	8	1	2	0	0	0	0	0	0	0	0	0	0	0	1	0	7455	0.1349
ALN_H7_NI_21	129	41	170	146	169	29	19	30	26	12	2	28	0	20	5	0	3	5	2	2	0	5	0	0	0	1	0	0	0	0	4	0	0	0	0	0	0	0	0	0	0	0	0	0	848	0.0153
ALN_H8_NI_21	584	152	500	541	564	131	104	109	88	49	1	113	9	62	24	23	2	19	4	6	0	6	7	4	0	2	0	0	4	4	4	0	0	0	0	0	0	0	0	0	0	0	0	0	3116	0.0564
ALN_G10_ZA_21	2422	819	2295	2585	2598	719	637	469	389	179	15	460	31	329	45	82	46	54	6	35	1	61	13	0	2	4	1	1	2	5	5	0	0	0	0	0	0	0	0	0	0	0	0	0	14310	0.259
ALN_G4_ZA_21	681	233	730	582	671	138	122	132	126	54	13	96	8	87	25	26	3	4	3	5	1	25	6	4	0	1	0	1	3	2	0	0	0	0	0	0	0	0	0	0	0	0	0	0	3782	0.0684
ALN_G5_ZA_21	1	1	1	0	3	0	0	0	0	1	0	0	0	0	0	0	0	0	0	0	0	0	0	0	0	0	0	0	0	0	0	0	0	0	0	0	0	0	0	0	0	0	0	0	7	0.0001
ALN_H2_ZA_21	308	699	151	247	62	24	17	11	3	18	6	2	1	0	6	0	4	0	5	7	1	0	0	2	0	0	0	0	0	0	0	0	0	0	0	0	0	0	0	0	0	0	0	0	1574	0.0285
ALN_H4_ZA_21	686	234	271	214	291	76	50	20	34	49	4	70	6	35	10	8	6	5	7	5	2	6	4	5	0	0	1	0	0	0	0	0	0	0	0	0	0	0	0	0	0	0	0	0	2099	0.038
Blood_E7_AB_7	5	2	8	3	9	1	0	0	1	1	0	0	0	1	0	0	0	0	0	0	0	0	0	0	0	0	0	0	0	0	0	0	0	0	0	0	0	0	0	0	0	0	0	0	31	0.0006
Blood_E8_AB_7	7	0	4	5	18	2	1	1	1	2	0	1	0	1	0	0	0	0	0	1	0	1	0	0	0	0	0	0	0	0	0	0	0	0	0	0	0	0	0	0	0	0	0	0	45	0.0008
Blood_E9_AB_7	6	1	5	5	10	0	0	2	0	0	0	0	0	1	0	0	0	0	0	0	0	0	0	0	0	0	0	0	0	0	0	0	0	0	0	0	0	0	0	0	0	0	0	0	30	0.0005
Blood_E4_IO_7	32	15	28	25	13	3	1	4	5	0	2	2	1	1	1	0	0	0	1	0	0	0	0	0	16	0	0	0	0	0	0	0	0	0	0	0	0	0	0	0	0	0	0	0	150	0.0027
Blood_E5_IO_7	1	2	1	1	2	0	1	1	0	0	0	0	0	0	0	0	0	0	0	0	0	0	0	0	0	0	0	0	0	0	0	0	0	0	0	0	0	0	0	0	0	0	0	0	9	0.0002
Blood_F3_IO_7	0	0	0	0	0	0	0	0	0	1	0	0	1	0	0	0	0	0	0	0	0	0	0	0	0	0	0	0	0	0	0	0	0	0	0	0	0	0	0	0	0	0	0	0	2	0
Blood_F4_IO_7	1	0	0	1	1	0	0	0	0	0	0	0	0	0	0	0	0	0	0	1	0	0	0	0	0	0	0	0	0	0	0	0	0	0	0	0	0	0	0	0	0	0	0	0	4	0.0001
Blood_F5_IO_7	6564	1570	5762	3035	3507	1489	1111	517	880	914	63	827	25	631	153	133	174	42	108	109	6	170	57	56	0	1	21	3	3	14	7	17	0	0	0	6	0	0	0	0	0	0	0	0	27975	0.5063
Blood_E1_NI_7	2	2	8	3	5	0	0	0	0	0	0	0	0	0	0	0	0	0	0	1	0	0	0	0	0	0	0	0	0	0	0	0	0	0	0	0	0	0	0	0	0	0	0	0	21	0.0004
Blood_E2_NI_7	6	2	5	5	5	0	2	1	1	0	0	1	0	0	0	0	0	0	0	0	0	0	0	0	0	0	0	0	0	0	0	0	0	0	0	0	0	0	0	0	0	0	0	0	28	0.0005
Blood_E3_NI_7	3	0	3	4	2	0	0	1	0	0	0	0	1	0	0	0	1	0	0	0	0	0	0	0	0	0	0	0	0	0	0	0	0	0	0	0	0	0	0	0	0	0	0	0	15	0.0003
Blood_F1_NI_7	1	0	0	1	0	0	0	0	0	0	0	0	0	0	0	0	0	0	0	0	0	0	0	0	0	0	0	0	0	0	0	0	0	0	0	0	0	0	0	0	0	0	0	0	2	0
Blood_F2_NI_7	12	5	14	14	5	1	1	3	3	0	0	1	0	3	2	2	0	0	0	0	0	0	0	0	0	0	0	0	0	0	0	0	0	0	0	0	0	0	0	0	0	0	0	0	66	0.0012
Blood_E6_ZA_7	15	3	16	9	19	2	2	0	3	3	0	1	0	0	0	1	0	0	0	0	0	0	0	0	0	0	0	0	0	0	0	0	0	0	0	0	0	0	0	0	0	0	0	0	74	0.0013
Blood_F6_ZA_7	1	1	1	1	1	1	0	0	0	0	0	0	0	0	0	0	0	0	0	0	0	0	0	1	0	0	0	0	0	0	0	0	0	0	0	0	0	0	0	0	0	0	0	0	7	0.0001
Blood_F7_ZA_7	2	1	1	0	0	0	0	0	0	0	0	0	0	0	0	0	0	0	0	0	0	0	0	0	0	0	0	0	0	0	0	0	0	0	0	0	0	0	0	0	0	0	0	0	4	0.0001
Blood_F8_ZA_7	1	0	0	0	3	0	0	0	0	0	0	0	0	0	0	0	0	0	0	0	0	0	0	0	0	0	0	0	0	0	0	0	0	0	0	0	0	0	0	0	0	0	0	0	4	0.0001
Blood_F9_ZA_7	8	6	3	3	2	2	0	1	0	0	0	1	0	0	0	2	1	1	1	0	0	0	0	1	0	0	0	0	0	0	0	0	0	0	0	0	0	0	0	0	0	0	0	0	32	0.0006
Blood_G1_AB_21	552	187	618	443	358	123	78	63	89	71	14	81	3	61	14	15	11	6	11	4	1	10	15	6	0	0	3	0	0	0	0	2	0	0	0	0	0	0	0	0	0	0	0	0	2839	0.0514
Blood_G2_AB_21	19956	6447	22864	20144	12675	4897	3199	3663	4034	2359	318	2973	42	2560	802	679	150	450	314	170	26	138	362	149	2	42	156	38	67	50	45	22	0	0	1	0	0	0	0	0	0	0	0	0	109794	1.987
Blood_G3_AB_21	0	1	2	0	4	0	1	0	0	0	0	2	0	0	0	0	0	0	0	0	0	0	0	0	0	0	0	0	0	0	0	0	0	0	0	0	0	0	0	0	0	0	0	0	10	0.0002
Blood_G7_AB_21	11028	1564	11630	5518	6843	3401	2080	1400	1915	1462	126	1530	24	1041	354	312	194	154	154	163	0	104	99	122	1	2	29	17	6	13	24	11	0	0	0	0	0	0	0	0	0	0	0	0	51321	0.9288
Blood_G9_AB_21	6192	1941	6607	5315	3611	1389	1109	1001	800	724	122	908	18	670	202	245	78	114	97	75	13	68	55	30	1	10	26	11	9	5	3	6	0	0	0	0	0	2	0	0	0	0	0	0	31457	0.5693
Blood_G6_IO_21	9094	2084	7818	2531	5888	3828	2059	1161	1051	1585	46	1164	34	939	158	164	243	36	169	182	0	145	15	105	0	8	26	1	5	8	1	10	0	0	0	0	0	0	0	0	0	0	0	0	40558	0.734
Blood_G8_IO_21	14242	4174	16330	13927	9425	3312	2441	2702	2457	1312	258	2072	23	1626	622	513	111	342	256	156	31	184	199	112	9	27	59	33	17	21	18	22	0	0	6	0	1	1	0	0	0	0	0	0	77041	1.3942
Blood_H1_IO_21	400	108	440	415	268	90	60	76	70	27	8	63	0	35	15	14	3	11	10	4	1	11	6	2	0	0	3	0	0	2	0	0	0	0	0	0	0	0	0	0	0	0	0	0	2142	0.0388
Blood_H5_IO_21	577	76	622	322	393	213	116	81	75	91	4	90	5	59	12	12	8	5	1	5	1	4	5	6	0	1	1	0	0	1	1	1	0	0	0	0	0	0	0	0	0	0	0	0	2788	0.0505
Blood_H6_IO_21	10560	3320	12254	11048	6426	2676	1946	1993	2041	1178	198	1670	19	1281	537	384	125	260	141	106	22	65	155	91	5	12	75	28	14	19	33	32	2	0	0	0	0	0	0	0	0	0	0	0	58716	1.0626
Blood_H10_NI_21	3	2	1	3	4	0	0	1	0	0	0	0	0	0	0	0	0	0	0	0	0	1	0	0	0	0	0	0	0	0	0	0	0	0	0	0	0	0	0	0	0	0	0	0	15	0.0003
Blood_H3_NI_21	86698	15509	85233	58649	49772	21096	15625	12891	11615	9826	758	10477	62	9446	2409	1984	1168	833	1338	1195	43	884	1046	651	58	69	474	71	257	25	227	75	0	0	0	0	0	0	0	0	0	0	0	0	400464	7.2473
Blood_H7_NI_21	8376	2050	7726	2653	6035	3452	2050	972	1195	1431	32	1200	33	746	185	186	459	55	132	155	5	124	25	121	7	0	73	0	0	3	3	10	0	0	0	0	0	0	0	0	0	0	0	0	39494	0.7147
Blood_H8_NI_21	15349	2204	15082	5995	8806	4502	3028	2106	2182	2427	135	1959	147	1290	477	325	310	133	201	196	12	251	124	150	0	2	83	11	17	5	0	0	0	0	0	0	0	0	0	0	0	0	0	0	67509	1.2217
Blood_H9_NI_21	5	5	8	1	10	2	5	0	0	0	0	1	0	0	0	0	1	1	0	0	0	1	0	0	0	0	0	0	0	0	0	0	0	0	0	0	0	0	0	0	0	0	0	0	40	0.0007
Blood_G10_ZA_21	5964	2083	7129	6544	4034	1682	1244	1325	1195	711	124	1045	28	801	289	133	61	131	104	79	18	64	69	30	2	7	27	27	12	4	19	6	1	0	1	1	0	2	0	0	0	0	0	0	34996	0.6333
Blood_G4_ZA_21	14526	3831	14859	13224	7419	3811	2412	2576	2167	1357	171	2174	65	1451	455	462	165	201	113	332	39	293	145	62	3	17	37	15	6	54	17	1	0	0	0	0	0	0	0	0	0	0	0	0	72460	1.3113
Blood_G5_ZA_21	12742	3390	14198	12415	7515	3093	2157	2189	2179	1396	156	2006	26	1283	449	366	142	208	198	145	29	169	139	132	9	19	84	26	37	38	1	1	0	0	0	0	0	0	0	0	0	0	0	0	66937	1.2114
Blood_H2_ZA_21	120441	30699	131548	124811	72332	29393	21287	22160	20863	12553	1702	16749	155	13399	4434	3973	1312	2199	1998	1540	227	1419	1547	953	14	172	759	336	156	119	308	184	5	2	1	0	0	1	3	0	0	0	0	0	639754	11.5778
Blood_H4_ZA_21	0	0	2	0	3	0	1	0	0	0	0	1	0	0	0	0	0	0	0	0	0	0	0	0	0	0	0	0	0	0	0	0	0	0	0	0	0	0	0	0	0	0	0	0	7	0.0001
Fec_A10_AB_7	7556	10714	68	142	306	14	105	7	11	104	410	9	26	8	4	2	14	1	14	0	1	0	0	0	0	6	0	0	0	0	0	0	0	0	0	0	0	0	0	0	0	0	0	0	19522	0.3533
Fec_A8_AB_7	0	1	0	0	0	0	0	0	0	0	0	0	0	0	0	0	0	0	0	0	0	0	0	0	0	0	0	0	0	0	0	0	0	0	0	0	0	0	0	0	0	0	0	0	1	0
Fec_A9_AB_7	1	0	0	0	0	0	0	0	0	0	0	0	0	0	0	0	0	0	0	0	0	0	0	0	0	0	0	0	0	0	0	0	0	0	0	0	0	0	0	0	0	0	0	0	1	0
Fec_B10_AB_7	3604	7047	711	782	447	129	137	61	120	256	32	94	4137	54	31	23	54	11	23	10	0	6	7	3	8	4	2	2	1	1	0	0	0	0	0	0	0	0	0	0	0	0	0	0	17797	0.3221
Fec_B3_IO_7	23263	47492	3087	2892	2249	881	986	394	710	2637	75	403	661	305	221	88	379	81	111	40	3	29	35	42	169	72	11	4	3	11	0	5	1	2	0	0	0	0	0	0	0	0	0	0	87342	1.5807
Fec_B4_IO_7	1655	2782	88	277	155	16	32	6	17	53	42	9	1001	3	2	2	1	0	4	0	0	0	1	3	0	0	1	0	0	0	0	0	0	0	0	0	0	0	0	0	0	0	0	0	6150	0.1113
Fec_B5_IO_7	23428	21834	699	1477	754	175	247	116	88	699	3062	105	119	76	30	22	127	17	58	10	1	8	14	16	0	23	0	2	2	7	0	1	2	0	0	0	0	0	0	0	0	0	0	0	53219	0.9631
Fec_B1_NI_7	48485	169551	1171	24892	2690	262	943	171	179	586	252	146	1063	118	50	46	73	24	77	16	3	11	16	10	5	23	1	1	0	1	0	0	3	0	0	0	0	0	0	0	0	0	0	0	250869	4.5401
Fec_A6_ZA_7	1	0	0	0	0	0	0	0	0	0	0	0	0	0	0	0	0	0	0	0	0	0	0	0	0	0	0	0	0	0	0	0	0	0	0	0	0	0	0	0	0	0	0	0	1	0
Fec_B6_ZA_7	6738	11207	348	537	314	70	86	43	51	307	33	28	140	22	15	2	26	8	20	2	1	2	4	8	101	4	0	1	0	1	1	0	0	0	0	0	0	0	0	0	0	0	0	0	20120	0.3641
Fec_B7_ZA_7	5705	6353	66	54	102	9	59	2	3	108	93	0	323	2	1	1	25	1	6	0	0	0	0	2	0	2	0	0	0	1	0	0	3	0	0	0	0	0	0	0	0	0	0	0	12921	0.2338
Fec_B8_ZA_7	6687	15436	753	1166	651	153	229	84	146	329	421	80	13599	38	29	13	77	1	47	5	3	0	11	3	0	11	0	2	2	0	0	0	0	0	0	0	0	0	0	0	0	0	0	0	39976	0.7235
Fec_B9_ZA_7	48908	70934	644	3776	1496	103	769	65	116	1931	987	47	683	45	29	13	119	10	181	1	0	8	2	27	5	168	5	0	1	1	1	0	6	4	0	0	0	0	0	0	0	0	0	0	131085	2.3723
Fec_C1_AB_21	42256	146789	4597	3630	4903	1047	680	771	724	596	83	628	8992	456	151	150	248	71	41	47	3	19	34	52	6	10	26	13	2	2	7	9	0	0	0	0	1	0	0	0	0	0	0	0	217044	3.9279
Fec_C2_AB_21	1662	3991	488	638	376	114	124	95	84	114	123	65	19	45	20	23	19	5	32	3	0	6	7	4	1	12	2	2	1	0	1	0	7	0	0	0	0	0	0	0	0	0	0	0	8083	0.1463
Fec_C3_AB_21	7498	3436	4771	4397	2067	1101	804	641	853	353	235	798	22994	439	185	149	43	181	37	69	7	111	62	10	2364	5	9	16	8	17	7	0	0	0	1	0	2	0	0	2	0	0	0	0	53672	0.9713
Fec_C7_AB_21	2871	2550	1845	1654	1110	387	307	317	335	213	899	294	119	175	102	35	21	27	23	12	2	24	17	17	150	3	9	4	3	3	3	0	1	0	0	0	0	0	0	0	0	0	0	0	13532	0.2449
Fec_C9_AB_21	0	2	0	0	0	0	0	0	0	0	0	0	0	0	0	0	0	0	0	0	0	0	0	0	0	0	0	0	0	0	0	0	0	0	0	0	0	0	0	0	0	0	0	0	2	0
Fec_C6_IO_21	735	1399	26	83	51	5	9	0	7	36	15	1	1	3	1	1	6	0	8	0	0	0	2	0	0	1	0	0	0	0	0	0	0	0	0	0	0	0	0	0	0	0	0	0	2390	0.0433
Fec_C8_IO_21	2081	4157	237	223	221	56	84	53	62	227	150	31	3	19	10	7	43	2	10	4	2	5	1	2	0	4	1	2	0	0	0	0	36	0	0	0	0	0	0	0	0	0	0	0	7733	0.1399
Fec_D7_NI_21	4458	7668	236	383	356	51	105	36	22	457	242	34	106	23	3	7	23	2	57	4	0	3	3	0	0	5	0	0	2	0	0	0	13	0	0	0	0	0	0	0	0	0	0	0	14299	0.2588
Fec_C10_ZA_21	9995	15051	234	464	349	75	132	34	56	303	22	30	107	20	9	10	12	2	59	2	0	2	3	5	0	44	2	1	0	0	0	0	0	0	0	0	0	0	0	0	0	0	0	0	27023	0.489
Fec_C4_ZA_21	2325	2744	1139	1033	715	270	198	229	202	462	3202	225	10	114	53	35	15	29	13	15	3	36	18	3	1	0	3	2	6	7	0	0	141	0	0	0	0	0	0	0	0	0	0	0	13248	0.2398
Fec_C5_ZA_21	2478	3455	54	88	96	9	24	9	12	56	32	7	1	5	2	1	2	0	23	1	0	3	0	1	0	7	0	1	0	0	0	0	0	0	0	0	0	0	0	0	0	0	0	0	6367	0.1152
MLN_A10_AB_7	0	0	0	1	0	0	0	0	0	0	0	0	0	0	0	0	0	0	0	0	0	0	0	0	0	0	0	0	0	0	0	0	0	0	0	0	0	0	0	0	0	0	0	0	1	0
MLN_B10_AB_7	0	0	1	0	0	0	1	1	1	0	0	1	0	1	1	0	0	0	0	0	0	0	0	0	0	0	0	0	0	0	0	0	0	0	0	0	0	0	0	0	0	0	0	0	7	0.0001
MLN_A4_IO_7	22	7	3	3	6	8	2	0	0	1	0	4	0	0	1	0	0	0	0	0	0	0	0	0	0	0	0	0	0	0	0	0	0	0	0	0	0	0	0	0	0	0	0	0	57	0.001
MLN_A5_IO_7	673	240	371	271	372	100	77	56	31	32	4	82	6	34	16	13	9	3	5	7	2	11	1	0	0	4	0	2	3	1	0	0	0	0	0	0	0	0	0	0	0	0	0	0	2426	0.0439
MLN_B3_IO_7	0	1	2	1	0	0	0	0	0	0	0	0	0	0	0	0	0	0	0	0	0	0	0	0	0	0	0	0	0	0	0	0	0	0	0	0	0	0	0	0	0	0	0	0	4	0.0001
MLN_B4_IO_7	1	0	0	0	0	0	0	0	0	0	0	1	0	0	0	0	1	0	0	0	0	0	0	0	0	0	0	0	0	0	0	0	0	0	0	0	0	0	0	0	0	0	0	0	3	0.0001
MLN_B5_IO_7	1	2	0	0	0	0	0	0	0	0	0	0	0	0	0	0	0	0	0	0	0	0	0	0	0	0	0	0	0	0	0	0	0	0	0	0	0	0	0	0	0	0	0	0	3	0.0001
MLN_B2_NI_7	1	0	0	0	0	0	0	0	0	0	0	1	0	0	0	0	0	0	0	0	0	0	0	0	0	0	0	0	0	0	0	0	0	0	0	0	0	0	0	0	0	0	0	0	2	0
MLN_B6_ZA_7	294	104	201	143	244	72	42	39	26	15	5	48	2	29	3	9	5	1	1	4	0	10	0	1	0	0	0	3	0	1	0	0	0	0	0	0	0	0	0	0	1	0	0	0	1303	0.0236
MLN_B7_ZA_7	282	103	281	210	238	57	33	40	24	17	2	64	1	29	5	14	5	9	4	3	2	6	5	0	1	4	0	0	0	2	0	0	0	0	0	0	0	0	0	0	0	0	0	0	1441	0.0261
MLN_B8_ZA_7	498	185	238	201	264	82	74	23	28	28	2	88	3	29	19	10	10	4	8	3	0	3	2	8	0	1	0	2	0	0	0	0	0	0	0	0	0	0	0	0	0	0	0	0	1813	0.0328
MLN_B9_ZA_7	1	0	0	0	0	0	0	0	0	0	0	0	0	0	0	0	0	0	0	0	0	0	0	0	0	0	0	0	0	0	0	0	0	0	0	0	0	0	0	0	0	0	0	0	1	0
MLN_C1_AB_21	5	4	7	1	8	3	0	0	2	0	0	0	1	0	0	0	0	1	0	1	0	0	0	0	0	0	0	0	0	0	0	0	0	0	0	0	0	0	0	0	0	0	0	0	33	0.0006
MLN_C2_AB_21	280	69	233	179	235	58	42	33	29	7	1	55	0	25	7	13	4	1	1	5	0	8	6	4	0	0	0	2	0	1	0	0	0	0	0	0	0	0	0	0	0	0	0	0	1298	0.0235
MLN_C3_AB_21	240	87	236	133	256	64	59	45	30	19	1	35	1	22	10	4	3	4	0	8	0	10	1	0	0	0	0	0	3	0	0	0	0	0	0	0	0	0	0	0	0	0	0	0	1271	0.023
MLN_C7_AB_21	130	41	124	79	114	29	27	28	13	6	1	21	1	14	3	6	1	2	0	4	0	3	2	0	0	1	0	0	0	0	0	0	0	0	0	0	0	0	0	0	0	0	0	0	650	0.0118
MLN_C9_AB_21	124	40	83	38	77	14	10	10	11	2	0	9	0	7	4	1	1	0	0	4	0	2	0	1	0	1	0	0	2	0	0	0	0	0	0	0	0	0	0	0	0	0	0	0	441	0.008
MLN_C6_IO_21	660	260	652	387	615	207	141	100	79	45	13	101	6	57	12	22	13	8	7	20	2	17	16	6	1	0	3	1	1	5	0	0	3	0	0	0	0	0	0	0	0	0	0	0	3460	0.0626
MLN_C8_IO_21	76	53	3	15	15	7	4	0	2	0	2	9	0	1	0	0	0	0	1	0	1	0	0	0	0	0	0	0	0	0	0	0	0	0	0	0	0	0	0	0	0	0	0	0	189	0.0034
MLN_D5_IO_21	89	33	77	42	114	35	16	24	9	7	3	21	1	13	4	3	1	1	0	4	0	1	2	0	0	0	0	0	0	2	0	0	0	0	0	0	0	0	0	0	0	0	0	0	502	0.0091
MLN_D6_IO_21	313	86	355	183	284	96	84	51	16	16	0	82	4	56	11	9	11	5	1	5	0	13	5	1	0	0	0	0	0	1	0	0	0	0	0	0	0	0	0	0	0	0	0	0	1688	0.0305
MLN_D3_NI_21	1029	315	562	396	523	124	134	92	75	40	12	101	6	60	36	28	10	14	13	9	4	22	1	7	4	4	0	0	0	4	0	0	0	0	0	0	0	0	0	0	0	0	0	0	3625	0.0656
MLN_C10_ZA_21	297	100	274	185	282	66	55	48	23	22	2	59	2	35	15	16	2	8	4	11	0	6	2	0	0	1	0	0	2	1	0	0	0	0	0	0	0	0	0	0	0	0	0	0	1518	0.0275
MLN_C4_ZA_21	230	90	132	106	117	31	31	13	12	16	5	28	0	14	2	0	2	7	0	3	0	3	1	4	0	2	0	2	1	0	0	0	0	0	0	0	0	0	0	0	0	0	0	0	852	0.0154
MLN_C5_ZA_21	23	1	10	1	6	1	0	0	0	1	0	2	0	0	0	0	0	0	0	0	0	0	0	0	0	1	0	0	0	0	0	0	0	0	0	0	0	0	0	0	0	0	0	0	46	0.0008
MLN_D2_ZA_21	184	31	41	42	70	9	12	13	2	0	0	27	1	2	2	2	1	0	1	3	0	9	0	1	0	0	0	0	0	0	0	0	0	0	0	0	0	0	0	0	0	0	0	0	453	0.0082
MLN_D4_ZA_21	307	105	293	201	271	99	72	60	26	21	2	66	1	24	15	15	2	7	3	11	0	6	0	0	0	0	0	0	0	3	0	0	0	0	0	0	0	0	0	0	0	0	0	0	1610	0.0291
RF_B10_AB_7	35061	11281	145	370	785	40	119	19	38	1140	5705	26	28	17	12	3	59	2	155	0	50	0	4	4	0	22	1	0	0	0	0	1	0	2	0	0	0	0	0	0	0	0	0	0	55089	0.997
RF_B3_IO_7	7851	2586	39	86	92	14	19	7	8	65	62	5	2	1	3	1	17	0	6	2	10	0	0	1	0	2	0	0	0	0	0	1	0	0	0	0	0	0	0	0	0	0	0	0	10880	0.1969
RF_B4_IO_7	19500	2424	122	130	189	27	33	9	34	163	1045	11	0	14	4	3	7	2	0	1	10	3	1	1	0	1	0	0	0	0	0	0	0	0	0	0	0	0	0	0	0	0	0	0	23734	0.4295
RF_B5_IO_7	17699	18949	245	279	365	52	57	28	50	314	226	40	1	22	20	9	107	8	17	3	36	0	3	8	0	4	0	0	0	2	0	0	0	0	0	0	0	0	0	0	0	0	0	0	38544	0.6975
RF_A1_NI_7	16969	3861	97	401	154	25	43	22	13	95	242	14	1	9	2	1	28	0	29	1	13	0	2	3	0	1	1	0	0	0	0	0	0	0	0	0	0	0	0	0	0	0	0	0	22027	0.3986
RF_B6_ZA_7	10473	4649	63	104	159	17	27	8	13	56	114	7	0	9	9	2	8	2	4	0	2	0	0	9	0	0	0	0	0	0	0	0	0	0	0	0	0	0	0	0	0	0	0	0	15735	0.2848
RF_B7_ZA_7	17292	4210	80	167	161	22	32	11	17	82	627	15	0	5	1	3	8	0	14	0	20	1	1	3	0	1	0	1	0	0	0	0	0	0	0	0	0	0	0	0	0	0	0	0	22774	0.4121
RF_B8_ZA_7	23192	5570	168	281	254	50	50	19	31	142	287	31	3	30	4	4	6	6	12	4	27	4	4	9	0	6	1	1	0	1	0	0	0	0	0	0	0	0	0	0	0	0	0	0	30197	0.5465
RF_B9_ZA_7	14527	8405	207	784	359	43	49	28	34	349	810	34	5	21	11	7	15	2	39	3	181	2	5	2	0	12	0	0	0	0	1	0	0	0	0	0	0	0	0	0	0	0	0	0	25935	0.4694
RF_C1_AB_21	13886	472	25	33	91	10	3	3	8	51	20	4	1	3	0	0	27	2	0	1	2	0	2	0	0	2	0	0	0	0	0	0	0	0	0	0	0	0	0	0	0	0	0	0	14646	0.2651
RF_C2_AB_21	9718	2205	9	57	95	2	8	0	8	180	444	1	0	2	2	2	23	0	19	0	62	0	0	0	0	4	0	0	0	0	0	0	0	0	0	0	0	0	0	0	0	0	0	0	12841	0.2324
RF_C3_AB_21	9257	2419	85	90	153	20	11	11	20	53	192	7	7	8	4	3	28	1	11	3	23	0	0	1	0	2	0	0	0	0	0	0	0	0	0	0	0	0	0	0	0	0	0	0	12409	0.2246
RF_C7_AB_21	13430	5970	74	159	175	11	26	5	12	930	67	10	2	7	2	3	16	2	10	1	23	1	2	3	0	3	0	0	0	0	0	1	0	0	0	0	0	0	0	0	0	0	0	0	20945	0.379
RF_C9_AB_21	25903	11926	90	99	323	23	51	7	12	152	470	12	1	2	7	5	204	3	9	0	30	1	0	0	2	5	1	0	0	1	0	0	0	0	0	0	0	0	0	0	0	0	0	0	39339	0.7119
RF_C6_IO_21	10567	1442	317	327	263	80	61	53	76	259	114	51	2	42	10	5	285	10	17	8	59	2	6	4	0	13	3	0	1	0	1	0	0	0	0	0	0	0	0	0	0	0	0	0	14078	0.2548
RF_C8_IO_21	13703	2583	32	62	167	5	14	7	9	66	178	4	0	5	4	2	57	2	5	1	2	1	0	0	0	7	0	0	0	0	0	0	0	0	0	0	0	0	0	0	0	0	0	0	16916	0.3061
RF_D1_IO_21	33285	4569	40	73	240	9	15	3	8	78	258	7	2	7	0	1	90	0	2	0	17	0	0	3	0	3	0	0	0	0	0	0	0	0	0	0	0	0	0	0	0	0	0	0	38710	0.7005
RF_D5_IO_21	31923	6535	308	385	421	50	89	50	65	3646	224	44	4	31	15	6	53	9	57	4	46	4	3	45	0	7	1	1	0	0	0	0	0	0	0	0	0	0	0	0	0	0	0	0	44026	0.7968
RF_D6_IO_21	8508	2149	37	41	47	3	2	2	6	43	9	2	0	0	0	0	64	1	4	0	1	1	0	0	0	3	0	0	0	0	0	0	0	0	0	0	0	0	0	0	0	0	0	0	10923	0.1977
RF_D10_NI_21	26195	4143	92	121	257	21	17	9	18	87	283	16	7	8	4	3	27	1	79	0	6	2	1	4	0	11	0	0	0	0	0	0	0	0	0	0	0	0	0	0	0	0	0	0	31412	0.5685
RF_D3_NI_21	3571	1170	26	53	35	11	6	3	13	26	9	7	3	3	0	0	70	1	6	0	1	1	0	14	0	4	0	0	0	0	0	0	0	0	0	0	0	0	0	0	0	0	0	0	5033	0.0911
RF_D7_NI_21	4492	6986	243	323	265	49	38	29	53	222	80	30	1	33	12	8	167	2	16	1	15	0	3	2	0	11	3	2	1	1	0	0	0	0	0	0	0	0	0	0	0	0	0	0	13088	0.2369
RF_D8_NI_21	7402	14484	1648	1567	1033	407	285	275	289	374	74	207	13	158	70	41	332	21	38	16	8	28	20	13	2	12	3	10	2	3	4	1	0	0	0	0	0	0	0	0	0	0	0	0	28840	0.5219
RF_D9_NI_21	11728	3383	50	93	118	14	15	4	9	65	138	5	0	4	0	2	15	0	5	0	10	1	1	2	0	8	0	0	0	0	0	0	0	0	0	0	0	0	0	0	0	0	0	0	15670	0.2836
RF_C10_ZA_21	1	9	0	0	0	0	0	0	0	0	0	0	0	0	0	0	0	0	0	0	0	0	0	0	0	0	0	0	0	0	0	0	0	0	0	0	0	0	0	0	0	0	0	0	10	0.0002
RF_C4_ZA_21	12005	3147	39	87	115	8	11	4	8	143	16	4	0	3	3	1	86	0	7	0	2	0	2	1	0	0	1	0	0	0	0	0	0	0	0	0	0	0	0	0	0	0	0	0	15693	0.284
RF_C5_ZA_21	13216	3200	89	148	120	29	21	17	23	89	60	21	18	8	5	0	22	2	10	2	4	3	2	3	1	7	0	0	1	0	0	0	0	0	0	0	0	0	0	0	0	0	0	0	17121	0.3098
RF_D2_ZA_21	12472	3511	76	135	133	14	15	5	18	221	39	10	0	7	6	2	76	5	14	0	11	0	2	7	0	5	0	2	0	0	0	0	0	0	0	0	0	0	0	0	0	0	0	0	16786	0.3038
RF_D4_ZA_21	13542	2686	90	176	150	32	9	13	14	463	182	12	2	11	3	2	81	3	17	1	28	1	0	2	0	8	0	0	0	1	0	0	0	0	0	0	0	0	0	0	0	0	0	0	17529	0.3172
																																													5525675

## Sheet: Averaged
taxon	Abo_AB_7(3)	Abo_IO_7(5)	Abo_NI_7(4)	Abo_ZA_7(4)	Abo_AB_21(4)	Abo_IO_21(5)	Abo_NI_21(3)	Abo_ZA_21(4)	AF_AB_7(4)	AF_IO_7(4)	AF_NI_7(5)	AF_ZA_7(4)	AF_AB_21(4)	AF_IO_21(5)	AF_NI_21(5)	AF_ZA_21(4)	ALN_AB_7(1)	ALN_IO_7(5)	ALN_NI_7(2)	ALN_ZA_7(4)	ALN_AB_21(3)	ALN_IO_21(5)	ALN_NI_21(3)	ALN_ZA_21(5)	Blood_AB_7(3)	Blood_IO_7(5)	Blood_NI_7(5)	Blood_ZA_7(5)	Blood_AB_21(5)	Blood_IO_21(5)	Blood_NI_21(5)	Blood_ZA_21(5)	Fec_AB_7(2)	Fec_IO_7(3)	Fec_NI_7(1)	Fec_ZA_7(4)	Fec_AB_21(4)	Fec_IO_21(2)	Fec_NI_21(1)	Fec_ZA_21(3)	MLN_AB_7(2)	MLN_IO_7(5)	MLN_NI_7(1)	MLN_ZA_7(3)	MLN_AB_21(5)	MLN_IO_21(4)	MLN_NI_21(1)	MLN_ZA_21(5)	RF_AB_7(1)
Bacteroidota	3089.3	13401.6	17045.5	3833	2482.8	842	10415.3	5522	23612.5	22857.3	1996.8	33071	16823	19776.4	25280.4	19960	2099	1028.6	381	1040	0.7	875.2	643	819.6	6	1319.6	4.8	5.4	7545.6	6974.6	22086.2	30734.6	5580	16115.3	48485	17009.5	13571.8	1408	4458	4932.7	0	139.4	1	358	155.8	284.5	1029	208.2	35061
Firmicutes	2446.3	9907.2	9296.8	3152.2	608.5	514.6	5218.7	2494	6055.5	9571.3	788.8	11035.8	8924.8	14900.8	14379.6	8789.8	431	361	192.5	316.5	0.7	388.4	206.3	397.2	1	317.4	1.8	2.2	2028	1952.4	3954	8000.6	8880.5	24036	169551	25982.5	39191.5	2778	7668	7083.3	0	50	0	130.7	48.2	108	315	65.4	11281
Actinobacteriota	1124.7	8674.8	6008.5	2726.8	1614.8	455.6	6145.3	3050.5	82.3	133.3	642.6	1228.8	791.8	1081.2	3475.4	953.5	1549	908.6	78.5	818.8	0	818.2	647	689.6	5.7	1158.2	6	4.2	8344.2	7492.8	21610	33547.2	389.5	1291.3	1171	452.8	2925.3	131.5	236	475.7	0.5	75.2	0	240	136.6	271.8	562	150	145
Proteobacteria	837.3	8212.4	5816.3	2336.4	1328	263.6	4631	2470.3	60.3	109	51.8	294.8	327.5	710.4	840.2	443	1887	939	126	937	0.7	954.6	782	725.6	4.3	612.4	5.4	2.6	6284	5648.6	13460.2	31398.8	462	1548.7	24892	1383.3	2579.8	153	383	528.3	0.5	55	0	184.7	86	156.8	396	107	370
Bacteria_unclassified	878	5318.4	3391.3	1841.4	959.5	351.6	3430.3	1819	313.8	292.8	63.2	434.3	520.5	959	819.2	286.3	1465	832.2	49	726.5	0.3	726.4	606.3	725	12.3	704.6	3.4	5	4698.2	4480	12925.4	18260.6	376.5	1052.7	2690	640.8	2114	136	356	386.7	0	75.6	0	248.7	138	257	523	149.2	785
Myxococcota	298.3	2049.4	1254.3	677	323.3	98.2	1296.3	716	13.8	23.5	7.2	50.3	77.8	150.2	146.6	53	382	179.8	20	185.8	0	182	153	191.4	1	298.4	0.2	1	1962	2023.8	5810.4	7595.8	71.5	357.3	262	83.8	662.3	30.5	51	118	0	21.6	0	70.3	33.6	86.3	124	41.2	40
Desulfobacterota	214	1465	877.3	501.8	209.3	72.8	856	452.3	20.3	28.3	7.2	79.5	98.5	147	158.2	58.8	326	164.4	37	157	0	162.4	116.3	165.2	0.3	222.6	0.6	0.4	1293.4	1324.4	4141.6	5420.2	121	421.7	943	285.8	478.8	46.5	105	118	0.5	15.8	0	49.7	27.6	61.3	134	34	119
Gemmatimonadota	100	1553.2	979.5	500.2	357.5	53	1035	543.5	5.5	9.8	4	37.3	40.8	110.8	95.4	34.3	387	165	13.5	143.3	0.3	175	135.3	126.4	1	104.4	1	0.2	1225.4	1202.6	3194	5650	34	172	171	48.5	456	26.5	36	90.7	0.5	11.2	0	34	23.2	43.8	92	26.8	19
Chloroflexi	162.3	1421.8	894.8	467	237	31.2	701.3	454.3	17.5	31.3	8.8	80.8	254	247.6	223.4	78.5	260	129.6	9.5	108.8	0	149.6	109	110.4	0.7	177	0.8	0.6	1367.6	1138.8	2998.4	5280.8	65.5	271.7	179	79	499	34.5	22	90	0.5	6.2	0	26	17	26.5	75	12.6	38
Verrucomicrobiota	180.3	783.4	599.3	257.4	94	35.8	428.3	294.5	178.8	148.3	31.8	257	354.5	495	556.8	351.3	107	74	32.5	64.3	0	65	45.3	60.2	1	183	0	0.6	923.2	838.6	2736.8	3203.4	180	1129.7	586	668.8	319	131.5	457	273.7	0	6.6	0	20	6.8	17	40	12	1140
Spirochaetota	48	469	555.5	80.2	135.8	8.8	227	163.8	650.8	356.3	184.2	1285	2063.3	1942.8	2191.4	814.3	2	13.6	8	12.3	0	9	5	7.6	0	13	0	0	116	102.8	185	430.6	221	1059.7	252	383.5	335	82.5	242	1085.3	0	0.8	0	3	0.6	4.5	12	1.8	5705
Acidobacteriota	223	1263.4	839	426.2	181.8	75	830.3	450.8	3.5	16.5	3.2	36.3	45.5	90	75.4	24.5	348	158.4	4.5	158	0	159	125.3	125.6	0.3	165.8	0.4	0.4	1098.8	1011.8	2727.4	4395	51.5	172.3	146	38.8	446.3	16	34	87.3	0.5	17.4	1	66.7	24	53.3	101	36.4	26
Campylobacterota	88	263.6	231.3	124.2	5.8	15.6	128	54.3	1.3	0.3	0.2	3.8	3.3	8.4	11.2	2.3	28	11.6	0.5	11	0	9.6	10.7	9.2	0	5.4	0.2	0	17.4	16.2	48.4	54.8	2081.5	593.7	1063	3686.3	8031	2	106	39.3	0	1.2	0	2	0.6	2.8	6	0.8	28
Nitrospirota	157.7	978.8	502	303.8	148	49.2	624.7	344.8	4	11.5	1.6	27.5	22.5	57	54.6	20	191	104.2	4	83.5	0	74.2	79.7	90.2	1	126.4	0.6	0	866.4	788	2296.4	3386.8	31	128	118	26.8	278.8	11	23	46.3	0.5	6.8	0	29	13.6	31.8	60	15	17
Planctomycetota	56	401.6	279.8	145.2	48.3	20.8	211	124.5	1.8	7	0.8	12.5	17	32.4	28.8	12.3	58	32.4	0	31	0	45.4	39.3	17.2	0	30.8	0.4	0	274.4	268.8	614.2	1125.4	17.5	84.3	50	18.5	114.5	5.5	3	21.3	0.5	3.4	0	9	4.8	6.8	36	6.8	12
Methylomirabilota	30.3	334.8	188	98.4	48.8	9.2	134.3	100	1.3	2	0.8	6.8	7.3	15.8	15.4	4.5	107	31.2	1	34.5	0	43.8	24.7	23.2	0	26.6	0.4	0.6	250.2	217.4	499	986.8	12.5	37.3	46	7.3	89.3	4	7	15.3	0	2.6	0	11	4.8	8.5	28	6.6	3
Patescibacteria	29.3	96.2	82	40.4	14.5	8.6	48	44	27.8	332.5	8.2	40	233.8	500.6	95.8	84.5	19	11.4	1	7	0	5.8	7.7	11.8	0	34.8	0.2	0.2	86.6	98	387.6	336	34	169	73	61.8	82.8	24.5	23	9.7	0	2	0	6.7	1.8	6.3	10	1.4	59
RCP2-54	35.3	271	205.3	65.6	29	7	176.7	73	0.5	1.8	0	5.5	8	16.8	9.6	3	41	19	0	17.5	0	23	18.7	12.6	0	8.4	0	0.2	144.8	130.8	204.4	547.8	6	32.7	24	5	71	1	2	10.3	0	0.6	0	4.7	1.6	3.5	14	4.4	2
Cyanobacteria	13.3	50	61.5	10.8	8	2	31	25.8	14.3	6.3	17.4	32.3	91.5	87.8	122.8	54.5	11	15.2	0	9	0	14.2	4.3	4.2	0	21.8	0	0.2	115.2	115.4	334.2	482.6	18.5	57.7	77	63.5	33.3	9	57	31.7	0	1	0	4.3	0.2	2.3	13	1.6	155
MBNT15	35.3	225.4	136	94	38.5	9.6	117.3	67.8	0	1.5	0	3.3	4	3.2	7.4	1.5	41	21.6	14.5	19.3	0	19.4	9.3	10.4	0.3	22	0.2	0	82.4	90.6	309.2	419.2	5	16.7	16	2	32.8	2	4	6	0	1.4	0	3.3	4.4	7.3	9	5.6	0
Fibrobacterota	2.3	39.4	111.5	6.2	28.5	0.8	36.7	41	31.3	16	93.6	113.8	233.8	181	388	222.3	1	3	3.5	1.8	0	3	1	1	0	1.2	0	0	8	11	12	62.6	0.5	1.3	3	1	3	1	0	1	0	0.4	0	0.7	0	0.8	4	0	50
NB1-j	16.3	196.8	118.5	68.8	35.3	6.2	115.7	58.8	0.8	0.8	0.4	2.5	4.5	5.8	5	1.8	27	21.8	0	20.8	0	19	14.7	18.4	0.3	34	0	0	64	81.8	252.2	389	3	12.3	11	2.5	40	2.5	3	13.7	0	2.2	0	6.3	4.6	7.8	22	4.8	0
Bdellovibrionota	19	96.2	68.3	26.8	14	4.2	44.3	30.8	0.5	1.3	0.2	5	3.8	6.8	7.2	2.5	18	5	0	2.3	0	7.2	4.3	4.6	0	11.4	0	0	106.2	76	239	380	3.5	16.7	16	4.3	30	1.5	3	7	0	0.2	0	2.3	1.8	5.8	1	0.6	4
Synergistota	1.7	23.8	25.5	6.4	5.8	1.2	12.3	10	1.5	3.5	1	9.5	6	19.2	42.2	19	13	5	0	3.3	0	6.2	6	2.2	0	11.2	0	0.4	61.4	63.2	184.4	235.4	1.5	20.3	10	10	20.8	1	0	3	0	0	0	3	1	1.8	7	1	4
Fusobacteriota	1.7	5	4.5	2	0	0.6	0.3	3	0	0	0	0	1	0.2	0.2	0.3	2	1	0	0	0	0.4	0.3	0.4	0	3.2	0	0	0.8	2.8	13	5.6	4	56.3	5	26.5	630.3	0	0	0.3	0	0	0	0.3	0	0.3	4	0	0
Elusimicrobiota	6	39.2	37	3.4	4.8	1.6	14	7.3	4.5	12	5.6	12.3	26.5	20.4	52.8	33.3	0	4.4	1	2.8	0	1	1.7	1	0	0.2	0	0	10.8	9.6	14.2	43	5	31.7	23	46.3	7.5	2.5	5	17	0	0.8	0	1.7	0.4	0	4	0.8	22
Hydrogenedentes	0	6.8	6.5	3.8	0.3	0	5.7	2.8	0	0	0	0	0.5	1.8	1.6	1	4	3.2	0	0	0	2.8	0	0.4	0	4.2	0	0	42.8	32.8	126	181.4	1	4	1	1.3	11.5	0.5	0	1.7	0	0	0	0	0	0.8	0	0	1
Dependentiae	8	32	20.5	6	1	0.6	14.3	6.8	0	0	0	0	0	1.8	2.4	0	4	2.6	9	4.5	0	4.6	0.7	0.4	0	0.6	0	0	13.2	12.4	16.4	80.8	1	2	1	0.8	8.8	1	0	1.3	0	0.4	0	1.7	0.4	0.3	0	0.4	0
Latescibacterota	5	38.6	12.8	6	4.8	1.6	17	5.3	0	0	0	1.3	0.8	2	1.8	0.3	9	3	0	3.8	0	0.2	4	1	0	0.6	0	0	16.4	7.2	54.8	42.2	0.5	1.7	0	0.8	3.5	0	2	2	0	0.6	0	0	1	0.3	0	0.6	0
Entotheonellaeota	5.3	43.2	27.5	9.4	6.3	2.4	23.3	11.5	0.3	0	0	0.3	0.3	2.2	1.8	1	3	4.6	1	4.3	0	2.2	1.7	1.4	0	2.8	0	0	13.6	10.2	6.6	43	0.5	6	1	0.8	5.5	0	0	2.3	0	0.2	0	1	0.2	2	4	0.8	0
Armatimonadota	2.7	5.6	6.8	3.2	1.8	0.6	4	0.8	0	0.5	0	0.3	0.8	0.4	1	0.3	3	0.6	0	1.5	0	2	3.3	1	0	1.4	0	0	14.4	10.6	46	69	0	0	0	0.5	4.5	0	0	0	0	0	0	0	0	0	0	0	0
SAR324_clade(Marine_group_B)	0	0.4	1	0.2	0	0	1.3	1	0	0.3	0	0	0	1	0	0	0	0	0	0	0	0	0	0	0	3.4	0	0	8.2	13	17	38.4	0	2	0	0	2.3	0	0	0	0	0	0	0	0	0	0	0	1
Deferribacterota	2	5.4	3	2.4	0	0.6	4.3	1.5	0	0	0	0	0	0	0	0	0	0	0	0	0	1.6	0	0	0	0	0	0	0	0.4	0	1.2	0	1	3	2.3	2	18	13	47	0	0	0	0	0	0.8	0	0	0
WPS-2	0	0.4	0	0	0	0	0	0	0	0	0	0.3	0.3	0.4	0.2	0	0	0	0	0	0	0	0	0	0	0	0	0	0	0	0	0.4	0	0.7	0	1	0	0	0	0	0	0	0	0	0	0	0	0	2
Dadabacteria	0	0.8	0.5	0	0	0	0	0	0	0	0	0	0	0	0	0	0	0	0	0	0	0	0	0	0	0	0	0	0.2	1.2	0	0.4	0	0	0	0	0.3	0	0	0	0	0	0	0	0	0	0	0	0
GAL15	0	0.2	1	0	0	0	0	0	0	0	0	0	0	0	0	0	0	0	0	0	0	0	0	0	0	1.2	0	0	0	0	0	0.2	0	0	0	0	0	0	0	0	0	0	0	0	0	0	0	0	0
Zixibacteria	0.3	0	1	0	0	0	0.7	0	0	0	0	0	0	0	0	0	0	0	0	0	0	0	0	0	0	0	0	0	0	0.2	0	0	0	0	0	0	0.8	0	0	0	0	0	0	0	0	0	0	0	0
Sumerlaeota	0	0	0.3	0.4	0	0	0	0	0	0	0	0	0	0	0.2	0	0	0	0	0	0	0	0	0	0	0	0	0	0.4	0.2	0	0.6	0	0	0	0	0	0	0	0	0	0	0	0	0	0	0	0	0
Deinococcota	0	0	0	0	0	0	0	0	0	0	0	0	0	0	0	0	0	0	0	0	0	0.2	0	0	0	0	0	0	0	0	0	0.6	0	0	0	0	0	0	0	0	0	0	0	0	0	0	0	0	0
Abditibacteriota	0	0	0	0	0	0	0	0	0	0	0	0	0	0	0.2	0	0	0	0	0	0	0	0	0	0	0	0	0	0	0	0	0	0	0	0	0	0.5	0	0	0	0	0	0	0	0	0	0	0	0
Deferrisomatota	0	0	0	0.2	0	0	0.3	0	0	0	0	0	0	0	0	0	0	0	0	0	0	0	0	0	0	0	0	0	0	0	0	0	0	0	0	0	0	0	0	0	0	0	0	0.3	0	0	0	0	0
Bacteria_ph	0	0.2	0.3	0	0	0	0	0	0	0	0	0	0	0	0	0	0	0	0	0	0	0	0	0	0	0	0	0	0	0	0	0	0	0	0	0	0	0	0	0	0	0	0	0	0	0	0	0	0
Calditrichota	0	0	0	0	0.3	0	0	0	0	0	0	0	0	0	0	0	0	0	0	0	0	0	0.3	0	0	0	0	0	0	0	0	0	0	0	0	0	0	0	0	0	0	0	0	0	0	0	0	0	0
Nitrospinota	0	0	0	0	0.3	0	0	0.3	0	0	0	0	0	0	0	0	0	0	0	0	0	0	0	0	0	0	0	0	0	0	0	0	0	0	0	0	0	0	0	0	0	0	0	0	0	0	0	0	0
Bacteria	10117.3	57675	49689.8	17827.2	8975.5	2944.6	36980.3	19445.3	31103.8	33974.3	3919.4	48167	30987	41576.2	49092.2	32311	9823	5255	987.5	4925.5	2.7	4950.6	3806.3	4354.4	35.3	5628	26.4	24.2	39084.2	36249	101504	162831	18659.5	48903.7	250869	51025.5	73082.8	5061.5	14299	15546	4	498.6	2	1519	738.6	1459.8	3625	895.8	55089
Percentage	0.2	1	0.9	0.3	0.2	0.1	0.7	0.4	0.6	0.6	0.1	0.9	0.6	0.8	0.9	0.6	0.2	0.1	0	0.1	0	0.1	0.1	0.1	0	0.1	0	0	0.7	0.7	1.8	2.9	0.3	0.9	4.5	0.9	1.3	0.1	0.3	0.3	0	0	0	0	0	0	0.1	0	1
[truncated: 7 more columns]

## Sheet: Abo_AF_Fec_RF
taxon	Abo_AB_7(3)	Abo_IO_7(5)	Abo_NI_7(4)	Abo_ZA_7(4)	Abo_AB_21(4)	Abo_IO_21(5)	Abo_NI_21(3)	Abo_ZA_21(4)	AF_AB_7(4)	AF_IO_7(4)	AF_NI_7(5)	AF_ZA_7(4)	AF_AB_21(4)	AF_IO_21(5)	AF_NI_21(5)	AF_ZA_21(4)	Fec_AB_7(2)	Fec_IO_7(3)	Fec_NI_7(1)	Fec_ZA_7(4)	Fec_AB_21(4)	Fec_IO_21(2)	Fec_NI_21(1)	Fec_ZA_21(3)	RF_AB_7(1)	RF_IO_7(3)	RF_NI_7(1)	RF_ZA_7(4)	RF_AB_21(5)	RF_IO_21(5)	RF_NI_21(5)	RF_ZA_21(5)	Total	Percentage
Bacteroidota	3089.3	13401.6	17045.5	3833	2482.8	842	10415.3	5522	23612.5	22857.3	1996.8	33071	16823	19776.4	25280.4	19960	5580	16115.3	48485	17009.5	13571.8	1408	4458	4932.7	35061	15016.7	16969	16371	14438.8	19597.2	10677.6	10247.2	469948	40.8029
Firmicutes	2446.3	9907.2	9296.8	3152.2	608.5	514.6	5218.7	2494	6055.5	9571.3	788.8	11035.8	8924.8	14900.8	14379.6	8789.8	8880.5	24036	169551	25982.5	39191.5	2778	7668	7083.3	11281	7986.3	3861	5708.5	4598.4	3455.6	6033.2	2510.6	438690	38.089
Actinobacteriota	1124.7	8674.8	6008.5	2726.8	1614.8	455.6	6145.3	3050.5	82.3	133.3	642.6	1228.8	791.8	1081.2	3475.4	953.5	389.5	1291.3	1171	452.8	2925.3	131.5	236	475.7	145	135.3	97	129.5	56.6	146.8	411.8	58.8	46443.8	4.03245
Proteobacteria	837.3	8212.4	5816.3	2336.4	1328	263.6	4631	2470.3	60.3	109	51.8	294.8	327.5	710.4	840.2	443	462	1548.7	24892	1383.3	2579.8	153	383	528.3	370	165	401	334	87.6	177.6	431.4	109.2	62738.2	5.4472
Bacteria_unclassified	878	5318.4	3391.3	1841.4	959.5	351.6	3430.3	1819	313.8	292.8	63.2	434.3	520.5	959	819.2	286.3	376.5	1052.7	2690	640.8	2114	136	356	386.7	785	215.3	154	233.3	167.4	227.6	341.6	103.6	31659.1	2.74878
Spirochaetota	48	469	555.5	80.2	135.8	8.8	227	163.8	650.8	356.3	184.2	1285	2063.3	1942.8	2191.4	814.3	221	1059.7	252	383.5	335	82.5	242	1085.3	5705	444.3	242	459.5	238.6	156.6	116.8	59.4	22259.4	1.93266
Myxococcota	298.3	2049.4	1254.3	677	323.3	98.2	1296.3	716	13.8	23.5	7.2	50.3	77.8	150.2	146.6	53	71.5	357.3	262	83.8	662.3	30.5	51	118	40	31	25	33	13.2	29.4	100.4	16.6	9160.2	0.795328
Gemmatimonadota	100	1553.2	979.5	500.2	357.5	53	1035	543.5	5.5	9.8	4	37.3	40.8	110.8	95.4	34.3	34	172	171	48.5	456	26.5	36	90.7	19	14.7	22	16.5	5.2	23	64	7.8	6666.7	0.578832
Desulfobacterota	214	1465	877.3	501.8	209.3	72.8	856	452.3	20.3	28.3	7.2	79.5	98.5	147	158.2	58.8	121	421.7	943	285.8	478.8	46.5	105	118	119	36.3	43	39.5	19.8	36.2	72.2	11.2	8143.3	0.707037
Chloroflexi	162.3	1421.8	894.8	467	237	31.2	701.3	454.3	17.5	31.3	8.8	80.8	254	247.6	223.4	78.5	65.5	271.7	179	79	499	34.5	22	90	38	30.7	13	23.8	12	32.8	76.4	12.6	6791.6	0.589676
Acidobacteriota	223	1263.4	839	426.2	181.8	75	830.3	450.8	3.5	16.5	3.2	36.3	45.5	90	75.4	24.5	51.5	172.3	146	38.8	446.3	16	34	87.3	26	18.7	14	21.8	6.8	21.6	53	9.4	5747.9	0.499058
Verrucomicrobiota	180.3	783.4	599.3	257.4	94	35.8	428.3	294.5	178.8	148.3	31.8	257	354.5	495	556.8	351.3	180	1129.7	586	668.8	319	131.5	457	273.7	1140	180.7	95	157.3	273.2	818.4	154.8	183.2	11794.8	1.02408
Nitrospirota	157.7	978.8	502	303.8	148	49.2	624.7	344.8	4	11.5	1.6	27.5	22.5	57	54.6	20	31	128	118	26.8	278.8	11	23	46.3	17	12.3	9	16.3	4.4	17	41.2	5.8	4093.6	0.355424
Patescibacteria	29.3	96.2	82	40.4	14.5	8.6	48	44	27.8	332.5	8.2	40	233.8	500.6	95.8	84.5	34	169	73	61.8	82.8	24.5	23	9.7	59	43.7	28	9.3	59.6	109.8	122.2	53	2648.6	0.229963
Planctomycetota	56	401.6	279.8	145.2	48.3	20.8	211	124.5	1.8	7	0.8	12.5	17	32.4	28.8	12.3	17.5	84.3	50	18.5	114.5	5.5	3	21.3	12	9	2	6.3	3	5.8	17.2	3.4	1773.1	0.153948
Fibrobacterota	2.3	39.4	111.5	6.2	28.5	0.8	36.7	41	31.3	16	93.6	113.8	233.8	181	388	222.3																	1546.2	0.134248
Methylomirabilota	30.3	334.8	188	98.4	48.8	9.2	134.3	100	1.3	2	0.8	6.8	7.3	15.8	15.4	4.5	12.5	37.3	46	7.3	89.3	4	7	15.3	3	4.3	1	4	2.6	2.8	10.8	1	1245.9	0.108174
RCP2-54	35.3	271	205.3	65.6	29	7	176.7	73	0.5	1.8	0	5.5	8	16.8	9.6	3	6	32.7	24	5	71	1	2	10.3	2	3.3	0	2.5	1.6	4.4	5	2	1080.9	0.0938484
Campylobacterota	88	263.6	231.3	124.2	5.8	15.6	128	54.3	1.3	0.3	0.2	3.8	3.3	8.4	11.2	2.3	2081.5	593.7	1063	3686.3	8031	2	106	39.3	28	1	1	2	2.2	1.6	4.8	4	16589	1.44033
MBNT15	35.3	225.4	136	94	38.5	9.6	117.3	67.8	0	1.5	0	3.3	4	3.2	7.4	1.5	5	16.7	16	2	32.8	2	4	6	0	2	1	1.8	1	2.6	3.4	0.6	841.7	0.07308
NB1-j	16.3	196.8	118.5	68.8	35.3	6.2	115.7	58.8	0.8	0.8	0.4	2.5	4.5	5.8	5	1.8																	638	0.0553939
Cyanobacteria	13.3	50	61.5	10.8	8	2	31	25.8	14.3	6.3	17.4	32.3	91.5	87.8	122.8	54.5	18.5	57.7	77	63.5	33.3	9	57	31.7	155	7.7	29	17.3	9.8	17	28.8	9.6	1251.2	0.108635
Bdellovibrionota	19	96.2	68.3	26.8	14	4.2	44.3	30.8	0.5	1.3	0.2	5	3.8	6.8	7.2	2.5
Elusimicrobiota	6	39.2	37	3.4	4.8	1.6	14	7.3	4.5	12	5.6	12.3	26.5	20.4	52.8	33.3
Others	26.7	162.4	111	40	20.3	7.6	83.7	42.8	1.8	4.3	1	11.5	9.5	29	51.6	21.8
																															Total		1.15175e+06

## Sheet: Blood_MLN_ALN
taxon	Blood_AB_7(3)	Blood_IO_7(5)	Blood_NI_7(5)	Blood_ZA_7(5)	Blood_AB_21(5)	Blood_IO_21(5)	Blood_NI_21(5)	Blood_ZA_21(5)	MLN_AB_7(2)	MLN_IO_7(5)	MLN_NI_7(1)	MLN_ZA_7(3)	MLN_AB_21(5)	MLN_IO_21(4)	MLN_NI_21(1)	MLN_ZA_21(5)	ALN_AB_7(1)	ALN_IO_7(5)	ALN_NI_7(2)	ALN_ZA_7(4)	ALN_AB_21(3)	ALN_IO_21(5)	ALN_NI_21(3)	ALN_ZA_21(5)	Total	Percentage
Firmicutes	1	317.4	1.8	2.2	2028	1952.4	3954	8000.6	0	50	0	130.7	48.2	108	315	65.4	431	361	192.5	316.5	0.7	388.4	206.3	397.2	19268.3	4.96552
Bacteroidota	6	1319.6	4.8	5.4	7545.6	6974.6	22086.2	30734.6	0	139.4	1	358	155.8	284.5	1029	208.2	2099	1028.6	381	1040	0.7	875.2	643	819.6	77739.8	20.0339
Proteobacteria	4.3	612.4	5.4	2.6	6284	5648.6	13460.2	31398.8	0.5	55	0	184.7	86	156.8	396	107	1887	939	126	937	0.7	954.6	782	725.6	64754.2	16.6874
Actinobacteriota	5.7	1158.2	6	4.2	8344.2	7492.8	21610	33547.2	0.5	75.2	0	240	136.6	271.8	562	150	1549	908.6	78.5	818.8	0	818.2	647	689.6	79114.1	20.388
Bacteria_unclassified	12.3	704.6	3.4	5	4698.2	4480	12925.4	18260.6	0	75.6	0	248.7	138	257	523	149.2	1465	832.2	49	726.5	0.3	726.4	606.3	725	47611.7	12.2697
Myxococcota	1	298.4	0.2	1	1962	2023.8	5810.4	7595.8	0	21.6	0	70.3	33.6	86.3	124	41.2	382	179.8	20	185.8	0	182	153	191.4	19363.6	4.99008
Campylobacterota	0	5.4	0.2	0	17.4	16.2	48.4	54.8	0	1.2	0	2	0.6	2.8	6	0.8	28	11.6	0.5	11	0	9.6	10.7	9.2	236.4	0.0609213
Desulfobacterota	0.3	222.6	0.6	0.4	1293.4	1324.4	4141.6	5420.2	0.5	15.8	0	49.7	27.6	61.3	134	34	326	164.4	37	157	0	162.4	116.3	165.2	13854.7	3.57041
Verrucomicrobiota	1	183	0	0.6	923.2	838.6	2736.8	3203.4	0	6.6	0	20	6.8	17	40	12	107	74	32.5	64.3	0	65	45.3	60.2	8437.3	2.17433
Gemmatimonadota	1	104.4	1	0.2	1225.4	1202.6	3194	5650	0.5	11.2	0	34	23.2	43.8	92	26.8	387	165	13.5	143.3	0.3	175	135.3	126.4	12755.9	3.28725
Chloroflexi	0.7	177	0.8	0.6	1367.6	1138.8	2998.4	5280.8	0.5	6.2	0	26	17	26.5	75	12.6	260	129.6	9.5	108.8	0	149.6	109	110.4	12005.4	3.09384
Spirochaetota	0	13	0	0	116	102.8	185	430.6	0	0.8	0	3	0.6	4.5	12	1.8	2	13.6	8	12.3	0	9	5	7.6	927.6	0.239046
Acidobacteriota	0.3	165.8	0.4	0.4	1098.8	1011.8	2727.4	4395	0.5	17.4	1	66.7	24	53.3	101	36.4	348	158.4	4.5	158	0	159	125.3	125.6	10779	2.77779
Nitrospirota	1	126.4	0.6	0	866.4	788	2296.4	3386.8	0.5	6.8	0	29	13.6	31.8	60	15	191	104.2	4	83.5	0	74.2	79.7	90.2	8249.1	2.12583
Planctomycetota	0	30.8	0.4	0	274.4	268.8	614.2	1125.4	0.5	3.4	0	9	4.8	6.8	36	6.8	58	32.4	0	31	0	45.4	39.3	17.2	2604.6	0.671216
Methylomirabilota	0	26.6	0.4	0.6	250.2	217.4	499	986.8	0	2.6	0	11	4.8	8.5	28	6.6	107	31.2	1	34.5	0	43.8	24.7	23.2	2307.9	0.594755
Patescibacteria	0	34.8	0.2	0.2	86.6	98	387.6	336	0	2	0	6.7	1.8	6.3	10	1.4	19	11.4	1	7	0	5.8	7.7	11.8	1035.3	0.266801
Cyanobacteria	0	21.8	0	0.2	115.2	115.4	334.2	482.6	0	1	0	4.3	0.2	2.3	13	1.6	11	15.2	0	9	0	14.2	4.3	4.2	1149.7	0.296282
RCP2-54	0	8.4	0	0.2	144.8	130.8	204.4	547.8	0	0.6	0	4.7	1.6	3.5	14	4.4	41	19	0	17.5	0	23	18.7	12.6	1197	0.308472
MBNT15	0.3	22	0.2	0	82.4	90.6	309.2	419.2	0	1.4	0	3.3	4.4	7.3	9	5.6	41	21.6	14.5	19.3	0	19.4	9.3	10.4	1090.4	0.281001
others	0.3	75.4	0	0.4	360.4	332.6	981.6	1573.8	0	4.8	0	17.3	9.4	20.3	46	9	38	20	10	17.3	0	20.2	16.3	6.8	3559.9	0.917401
																						Total			388042

## Sheet: F_B_ratio
taxon	F/B	Firmicutes	Bacteroidota	tissue	treatment	dpi
Abo_AB_7(3)	0.792	2446.3	3089.3	Abo	AB	7
Abo_IO_7(5)	0.739	9907.2	13401.6	Abo	IO	7
Abo_NI_7(4)	0.545	9296.8	17045.5	Abo	NI	7
Abo_ZA_7(4)	0.822	3152.2	3833	Abo	ZA	7
Abo_AB_21(4)	0.245	608.5	2482.8	Abo	AB	21
Abo_IO_21(5)	0.611	514.6	842	Abo	IO	21
Abo_NI_21(3)	0.501	5218.7	10415.3	Abo	NI	21
Abo_ZA_21(4)	0.452	2494	5522	Abo	ZA	21
AF_AB_7(4)	0.256	6055.5	23612.5	AF	AB	7
AF_IO_7(4)	0.419	9571.3	22857.3	AF	IO	7
AF_NI_7(5)	0.395	788.8	1996.8	AF	NI	7
AF_ZA_7(4)	0.334	11035.8	33071	AF	ZA	7
AF_AB_21(4)	0.531	8924.8	16823	AF	AB	21
AF_IO_21(5)	0.753	14900.8	19776.4	AF	IO	21
AF_NI_21(5)	0.569	14379.6	25280.4	AF	NI	21
AF_ZA_21(4)	0.44	8789.8	19960	AF	ZA	21
ALN_AB_7(1)	0.205	431	2099	ALN	AB	7
ALN_IO_7(5)	0.351	361	1028.6	ALN	IO	7
ALN_NI_7(2)	0.505	192.5	381	ALN	NI	7
ALN_ZA_7(4)	0.304	316.5	1040	ALN	ZA	7
ALN_AB_21(3)	1	0.7	0.7	ALN	AB	21
ALN_IO_21(5)	0.444	388.4	875.2	ALN	IO	21
ALN_NI_21(3)	0.321	206.3	643	ALN	NI	21
ALN_ZA_21(5)	0.485	397.2	819.6	ALN	ZA	21
Blood_AB_7(3)	0.167	1	6	Blood	AB	7
Blood_IO_7(5)	0.241	317.4	1319.6	Blood	IO	7
Blood_NI_7(5)	0.375	1.8	4.8	Blood	NI	7
Blood_ZA_7(5)	0.407	2.2	5.4	Blood	ZA	7
Blood_AB_21(5)	0.269	2028	7545.6	Blood	AB	21
Blood_IO_21(5)	0.28	1952.4	6974.6	Blood	IO	21
Blood_NI_21(5)	0.179	3954	22086.2	Blood	NI	21
Blood_ZA_21(5)	0.26	8000.6	30734.6	Blood	ZA	21
Fec_AB_7(2)	1.591	8880.5	5580	Fec	AB	7
Fec_IO_7(3)	1.491	24036	16115.3	Fec	IO	7
Fec_NI_7(1)	3.497	169551	48485	Fec	NI	7
Fec_ZA_7(4)	1.528	25982.5	17009.5	Fec	ZA	7
Fec_AB_21(4)	2.888	39191.5	13571.8	Fec	AB	21
Fec_IO_21(2)	1.973	2778	1408	Fec	IO	21
Fec_NI_21(1)	1.72	7668	4458	Fec	NI	21
Fec_ZA_21(3)	1.436	7083.3	4932.7	Fec	ZA	21
MLN_AB_7(2)	0	0	0	MLN	AB	7
MLN_IO_7(5)	0.359	50	139.4	MLN	IO	7
MLN_NI_7(1)	0	0	1	MLN	NI	7
MLN_ZA_7(3)	0.365	130.7	358	MLN	ZA	7
MLN_AB_21(5)	0.309	48.2	155.8	MLN	AB	21
MLN_IO_21(4)	0.38	108	284.5	MLN	IO	21
MLN_NI_21(1)	0.306	315	1029	MLN	NI	21
MLN_ZA_21(5)	0.314	65.4	208.2	MLN	ZA	21
RF_AB_7(1)	0.322	11281	35061	RF	AB	7
RF_IO_7(3)	0.532	7986.3	15016.7	RF	IO	7
RF_NI_7(1)	0.228	3861	16969	RF	NI	7
RF_ZA_7(4)	0.349	5708.5	16371	RF	ZA	7
RF_AB_21(5)	0.318	4598.4	14438.8	RF	AB	21
RF_IO_21(5)	0.176	3455.6	19597.2	RF	IO	21
RF_NI_21(5)	0.565	6033.2	10677.6	RF	NI	21
RF_ZA_21(5)	0.245	2510.6	10247.2	RF	ZA	21

## Sheet: treated
	ALL_AB	ALL_IO	ALL_NI	All_ZA	total	Percentage
Bacteroidota	8890.4	8545.5	11390.9	10293.7	39120.5	35.5		Here are the average of 14 samples in each treatment category
Firmicutes	6035.4	5451.9	15819	5404.9	32711.3	29.68
Proteobacteria	1022.5	1407.6	3729.7	2946.8	9106.6	8.26		All the ones with less than 0.1 grouped together.
Actinobacteriota	1226.1	1626.8	2935.1	3180.4	8968.4	8.14
Bacteria_unclassified	887.8	1116.4	1810.9	1847.2	5662.2	5.14
Myxococcota	277	397.2	660.7	702.4	2037.4	1.85
Spirochaetota	679.7	333.1	301.5	341.9	1656.2	1.5
Desulfobacterota	209.2	300.3	535.1	526.7	1571.3	1.43
Verrucomicrobiota	268.4	350.5	411.7	414.5	1445.1	1.31
Gemmatimonadota	189.7	261.8	417.3	518.5	1387.3	1.26
Chloroflexi	209.4	266.4	379.4	487.5	1342.6	1.22
Campylobacterota	734.8	66.6	115.1	285.3	1201.8	1.09
Acidobacteriota	175.4	231.4	353.9	419.8	1180.5	1.07
Nitrospirota	124	171.2	272.5	314	881.6	0.8
Others	90.8	66.5	97.5	114.9	369.7	0.3
Planctomycetota	43.4	68.1	91.6	109.5	312.7	0.28
Patescibacteria	46.3	103.1	63.3	50.4	263.1	0.24
Methylomirabilota	39.8	52.9	68.3	92.9	253.8	0.23
Cyanobacteria	33.6	29.1	55.4	53.4	171.5	0.16
RCP2-54	24.3	37.4	47.1	53.9	162.7	0.15
MBNT15	17.5	30.4	44.8	45.3	138	0.13
Fibrobacterota	27.6	21.6	48.2	37	134.3	0.12
NB1-j	14	28.1	39.2	42.1	123.5	0.11
Bdellovibrionota	14.4	16.8	27.9	33.6	92.6	0.08
Synergistota	8.4	12.2	21.3	22.3	64.1	0.06
Fusobacteriota	45.7	5	2	2.8	55.4	0.05
Elusimicrobiota	6.5	9.5	12	12.7	40.6	0.04
Hydrogenedentes	4.4	4.1	10.2	13.8	32.5	0.03
Dependentiae	2.6	4.2	4.8	7.4	18.9	0.02
Latescibacterota	2.9	4	6.6	4.5	18.1	0.02
Entotheonellaeota	2.5	5.5	4.8	5.4	18.2	0.02
Armatimonadota	1.9	1.6	4.4	5.5	13.4	0.01
SAR324_clade(Marine_group_B)	0.8	1.5	1.4	2.8	6.5	0.01
Deferribacterota	0.3	2	1.7	3.9	7.8	0.01
WPS-2	0.2	0.1	0	0.1	0.4	0
Dadabacteria	0	0.1	0	0	0.2	0
GAL15	0	0.1	0.1	0	0.2	0
Zixibacteria	0.1	0	0.1	0	0.2	0
Sumerlaeota	0	0	0	0.1	0.1	0
Deinococcota	0	0	0	0	0.1	0
Abditibacteriota	0	0	0	0	0.1	0
Deferrisomatota	0	0	0	0	0.1	0
Bacteria_ph	0	0	0	0	0	0
Calditrichota	0	0	0	0	0	0
Nitrospinota	0	0	0	0	0	0
					110202

## Sheet: 7_21_dpi
	7_dpi	21_dpi	Total	Percentage
Bacteroidota	10567.8	8992.5	19560.3	35.5	Here as well the average for 28 samples in each group were taken
Firmicutes	11119.5	5236.2	16355.6	29.68	All with less than 0.1 os are grouped together.
Proteobacteria	1858.1	2695.1	4553.29	8.26
Actinobacteriota	1045.6	3438.6	4484.19	8.14
Bacteria_unclassified	814.4	2016.7	2831.09	5.14
Myxococcota	229.9	788.8	1018.7	1.85
Spirochaetota	444.6	383.5	828.1	1.5
Desulfobacterota	220.6	565	785.63	1.43
Verrucomicrobiota	252.2	470.3	722.56	1.31
Gemmatimonadota	162.4	531.2	693.65	1.26
Chloroflexi	160.9	510.4	671.31	1.22
Campylobacterota	293.9	307	600.89	1.09
Acidobacteriota	150.8	439.5	590.24	1.07
Nitrospirota	103.3	337.5	440.8	0.8
Planctomycetota	45.3	111	156.34	0.28
Patescibacteria	43.4	88.1	131.55	0.24
Methylomirabilota	35.5	91.5	126.92	0.23
Cyanobacteria	24.8	61	85.73	0.16
RCP2-54	26.9	54.5	81.35	0.15
MBNT15	23.7	45.3	69	0.13
Fibrobacterota	20.4	46.8	67.17	0.12
NB1-j	19.6	42.1	61.73	0.11
Others	44.4	140.4	184.9	0.3
Bdellovibrionota	11	35.4	46.32	0.08
Synergistota	6	26.1	32.05	0.06
Fusobacteriota	4	23.7	27.72	0.05
Elusimicrobiota	9.5	10.8	20.31	0.04
Hydrogenedentes	1.4	14.9	16.24	0.03
Dependentiae	3.4	6.1	9.46	0.02
Entotheonellaeota	4	5.1	9.12	0.02
Latescibacterota	3	6.1	9.04	0.02
Armatimonadota	0.9	5.8	6.7	0.01
Deferribacterota	0.7	3.2	3.91	0.01
SAR324_clade(Marine_group_B)	0.3	2.9	3.26	0.01
WPS-2	0.2	0	0.2	0
Dadabacteria	0	0.1	0.12	0
Zixibacteria	0	0.1	0.11	0
GAL15	0.1	0	0.09	0
Sumerlaeota	0	0.1	0.07	0
Deferrisomatota	0	0	0.03	0
Deinococcota	0	0	0.03	0
Abditibacteriota	0	0	0.03	0
Calditrichota	0	0	0.02	0
Nitrospinota	0	0	0.02	0
Bacteria_ph	0	0	0.02	0
	total		55101
