# Supplementary material for: What Metagenomics Reveals of Microbial Populations in a Host-Parasite Relationship Between Alpine Goats and <em>Haemonchus contortus</em>
Source: Preprints.org preprint supplement (doi:10.20944/preprints202312.1796.v1), 2023-12-25
Supplement: Supplementary file 6 [file bTable AAA.xlsx]

## Sheet: alpha_div_nonsample
group	nseqs	coverage	sobs	invsimpson	chao	npshannon	shannon	simpson
Blood_G6_IO_21	40558	0.969944	2416	39.5967	5805.82	5.73423	5.66125	0.025255
Blood_H8_NI_21	67509	0.968641	3864	52.4131	10510.2	6.08337	6.01044	0.019079
Blood_H7_NI_21	39494	0.968299	2473	47.5528	5777.33	5.87769	5.8046	0.021029
Blood_H3_NI_21	400464	0.967228	19047	51.2907	64274.5	6.51974	6.42247	0.019497
Blood_H2_ZA_21	639754	0.965831	30845	86.0943	117756	6.89329	6.79741	0.011615
Blood_F5_IO_7	27975	0.957748	2707	57.6396	5041.35	6.2778	6.1895	0.017349
Blood_G7_AB_21	51321	0.954132	4090	59.173	12457	6.27172	6.1807	0.0169
Blood_G2_AB_21	109794	0.946809	9310	119.817	31002	6.95001	6.8541	0.008346
AF_F5_IO_7	48784	0.93791	4031	6.54691	16699.2	4.31195	4.0653	0.152744
Blood_G5_ZA_21	66937	0.934819	7428	97.0597	21080.4	6.93355	6.8212	0.010303
AF_G4_ZA_21	49251	0.934113	4658	63.2363	15809.2	5.85619	5.69124	0.015814
AF_F8_ZA_7	88335	0.933548	8057	29.3191	28835.7	5.56102	5.34798	0.034107
AF_F6_ZA_7	41801	0.932346	3882	20.1241	13976.4	4.98589	4.76246	0.049692
Blood_H6_IO_21	58716	0.931961	6662	116.325	18823.6	6.93022	6.81756	0.008597
Blood_G4_ZA_21	72460	0.930596	8241	77.6072	25120.7	6.87531	6.75014	0.012885
AF_H7_NI_21	50865	0.924172	5425	70.9024	19145.1	6.01473	5.83205	0.014104
AF_H2_ZA_21	46366	0.92158	5182	66.7316	17745.6	5.87079	5.66955	0.014985
AF_G6_IO_21	42416	0.921515	4904	67.5583	15200.4	6.01962	5.82913	0.014802
AF_E7_AB_7	60111	0.920414	6182	8.264	25907.8	4.65632	4.34438	0.121007
AF_E10_AB_7	34960	0.920223	3775	28.3339	14788.8	5.24612	5.01129	0.035293
RF_D1_IO_21	38710	0.919478	4083	40.6308	17498.2	5.36429	5.13719	0.024612
RF_B4_IO_7	23734	0.919398	2613	24.2144	10297.2	5.08691	4.86049	0.041298
RF_B8_ZA_7	30197	0.919297	3336	14.0713	11939.7	5.0056	4.75151	0.071066
RF_D8_NI_21	28840	0.919036	3982	76.5912	9854.73	6.29528	6.12511	0.013056
RF_D5_IO_21	44026	0.918344	4937	34.8753	17554.6	5.52112	5.28575	0.028674
AF_E6_ZA_7	27383	0.917869	3112	23.1528	10987	5.13065	4.88639	0.043191
Blood_G8_IO_21	77041	0.917615	9680	107.123	34330	7.09993	6.97025	0.009335
RF_C9_AB_21	39339	0.917461	4234	37.2323	19733.7	5.47401	5.25283	0.026858
RF_B10_AB_7	55089	0.916807	5827	47.2319	29368.8	5.61709	5.38993	0.021172
AF_H5_IO_21	54615	0.913723	7148	122.312	21986.4	6.64463	6.47199	0.008176
Fec_C1_AB_21	217044	0.913391	24203	31.3576	119754	6.41118	6.16032	0.03189
AF_F3_IO_7	27490	0.912405	3220	26.5748	13720.1	5.25901	5.01726	0.03763
AF_H8_NI_21	22337	0.912208	3414	15.9127	7442.89	5.8266	5.59176	0.062843
RF_B7_ZA_7	22774	0.909239	2829	43.1841	10650.3	5.4583	5.23229	0.023157
RF_A1_NI_7	22027	0.908975	2715	34.721	10982.5	5.27075	5.0303	0.028801
AF_E4_IO_7	30086	0.907931	3616	20.7971	15907.9	5.13426	4.85982	0.048084
RF_C7_AB_21	20945	0.906374	2714	26.5512	10280.1	5.34628	5.10358	0.037663
Blood_G10_ZA_21	34996	0.906275	5344	119.084	14964	6.96436	6.83116	0.008397
Fec_C3_AB_21	53672	0.905761	7447	6.81601	20645.3	5.16564	4.80617	0.146713
RF_D6_IO_21	10923	0.905337	1429	28.1617	5601.35	5.01919	4.78927	0.035509
AF_H3_NI_21	99865	0.904641	12338	121.379	56271.1	6.55147	6.33129	0.008239
AF_F10_AB_7	29334	0.901855	3886	9.70971	13868.8	5.0693	4.75264	0.10299
AF_G2_AB_21	21730	0.901703	3115	79.7217	9782.19	5.9827	5.77689	0.012544
Blood_G9_AB_21	31457	0.900531	5141	91.1624	13990.5	6.91259	6.76471	0.010969
Fec_B1_NI_7	250869	0.899768	31002	41.2775	169470	6.56825	6.27768	0.024226
AF_H1_IO_21	59506	0.899304	8163	50.2803	32255.7	6.31356	6.07749	0.019889
RF_B5_IO_7	38544	0.899206	5192	47.6838	21665.1	5.9532	5.7147	0.020971
AF_G5_ZA_21	33606	0.898857	4746	54.6173	16113.9	6.09123	5.86326	0.018309
RF_D4_ZA_21	17529	0.896914	2457	49.673	9873.91	5.56011	5.32854	0.020132
RF_D9_NI_21	15670	0.89649	2243	40.4094	8034.33	5.42888	5.18238	0.024747
AF_F7_ZA_7	35149	0.895474	4820	20.997	18965.3	5.49296	5.19436	0.047626
RF_B9_ZA_7	25935	0.894467	3692	25.2242	14576.3	5.64593	5.38519	0.039645
RF_C5_ZA_21	17121	0.894457	2556	77.1185	8050.01	5.84187	5.6204	0.012967
RF_D10_NI_21	31412	0.894117	4254	17.7285	20613.4	5.33496	5.03224	0.056406
RF_C1_AB_21	14646	0.893077	1909	5.48527	10986	3.77059	3.34693	0.182306
AF_G1_AB_21	39899	0.892754	6178	59.985	19983.1	6.449	6.22383	0.016671
AF_H9_NI_21	48706	0.892087	7089	73.2464	28433.9	6.33677	6.09971	0.013653
Fec_B5_IO_7	53219	0.891636	7793	32.036	33371.9	6.15374	5.89009	0.031215
AF_F2_NI_7	19252	0.891596	2898	41.3882	10105.8	5.6874	5.43728	0.024161
RF_C2_AB_21	12841	0.890741	1954	40.9762	6705.22	5.4277	5.17467	0.024404
Abo_B5_IO_7	82047	0.88932	14811	150.861	42406.5	7.76856	7.61777	0.006629
RF_C8_IO_21	16916	0.887148	2498	28.2182	11381.8	5.33153	5.05259	0.035438
RF_C6_IO_21	14078	0.886419	2312	33.357	6842.5	5.48031	5.19477	0.029979
Fec_B9_ZA_7	131085	0.88541	18595	35.1807	103032	6.52848	6.23305	0.028425
RF_B6_ZA_7	15735	0.885351	2408	38.5713	10748	5.49306	5.23149	0.025926
RF_D2_ZA_21	16786	0.882879	2540	50.4333	11962.4	5.54995	5.28689	0.019828
AF_G3_AB_21	27930	0.88174	4370	71.9556	18352.7	6.06549	5.81363	0.013897
RF_B3_IO_7	10880	0.879044	1842	39.9823	6062.83	5.46638	5.19452	0.025011
RF_C3_AB_21	12409	0.877428	2102	35.5546	6878.69	5.54169	5.26097	0.028126
AF_G7_AB_21	34389	0.87653	5642	85.0253	22614	6.34896	6.09714	0.011761
Fec_B8_ZA_7	39976	0.87565	6738	9.47127	25568.7	5.69344	5.32472	0.105582
AF_H6_IO_21	29764	0.873706	5185	74.1898	18338	6.34702	6.08601	0.013479
AF_E5_IO_7	29537	0.871686	4995	47.8185	20672.2	6.09173	5.80473	0.020912
Abo_B2_NI_7	43917	0.867022	9639	211.888	26453.5	7.73963	7.58542	0.004719
Fec_B3_IO_7	87342	0.865597	15568	136.674	69309.2	7.37157	7.15607	0.007317
RF_C4_ZA_21	15693	0.865481	2766	75.3246	11782.6	5.941	5.68142	0.013276
Abo_C4_ZA_21	42797	0.853822	10044	231.097	27435.7	7.83792	7.67447	0.004327
Fec_C7_AB_21	13532	0.853015	3297	127.853	8583.27	6.91226	6.72032	0.007821
Abo_B3_IO_7	51307	0.851287	11808	157.878	31824.9	7.75897	7.55103	0.006334
Fec_B7_ZA_7	12921	0.850321	2661	52.2367	10167.9	6.03078	5.74998	0.019144
Fec_C10_ZA_21	27023	0.850054	5453	51.0862	22134.6	6.47301	6.18506	0.019575
Fec_B6_ZA_7	20120	0.845229	4237	62.9128	17408	6.49866	6.24032	0.015895
RF_D3_NI_21	5033	0.844824	1139	83.5992	3169.6	5.77421	5.51735	0.011962
RF_D7_NI_21	13088	0.843368	2829	47.1945	9331.24	6.10716	5.79914	0.021189
AF_H10_NI_21	23688	0.84279	5001	88.7005	18514.1	6.5932	6.31297	0.011274
Fec_B10_AB_7	17797	0.838624	4041	22.506	13023	6.30324	5.9707	0.044433
Abo_A1_NI_7	57095	0.835047	13972	182.886	41227.5	7.88826	7.66422	0.005468
Abo_A5_IO_7	62146	0.829016	15929	117.504	42951.8	7.9223	7.64973	0.00851
Fec_A10_AB_7	19522	0.82051	4449	67.5242	22289.9	6.48507	6.17802	0.01481
Abo_A2_NI_7	61206	0.816391	15421	172.708	54157.6	7.75856	7.48047	0.00579
Fec_C4_ZA_21	13248	0.811368	3620	40.2681	10464.8	6.54494	6.18649	0.024834
Abo_B8_ZA_7	29169	0.806747	8044	90.7434	24608.2	7.41754	7.12514	0.01102
AF_G8_IO_21	21580	0.805375	5388	124.044	23913	6.90344	6.61637	0.008062
Fec_D7_NI_21	14299	0.798238	3907	81.1222	14574.1	6.77682	6.47609	0.012327
Abo_A4_IO_7	43866	0.78929	12733	153.527	42332.4	7.90705	7.63315	0.006513
Abo_D2_ZA_21	34813	0.771723	11081	74.7507	33410.2	7.75002	7.38285	0.013378
Fec_C8_IO_21	7733	0.770982	2504	141.6	7642.8	6.84894	6.5673	0.007062
Abo_D10_NI_21	45053	0.766852	14247	183.08	46524.2	8.09819	7.79086	0.005462
Fec_C5_ZA_21	6367	0.765824	1975	57.5269	7671.38	6.32746	5.97151	0.017383
Abo_B7_ZA_7	25318	0.757998	8599	137.605	26253.8	7.84097	7.52688	0.007267
Fec_C2_AB_21	8083	0.756526	2787	157.819	9010.56	6.99031	6.68922	0.006336
Fec_B4_IO_7	6150	0.75561	1939	34.507	8244.88	6.17412	5.76072	0.02898
Abo_D9_NI_21	20452	0.75088	7420	241.019	20192.6	7.98158	7.69631	0.004149
Abo_B4_IO_7	49009	0.748658	16060	132.603	61786.6	8.11355	7.77555	0.007541
Abo_B1_NI_7	36541	0.746668	11476	175.15	54837.7	7.70303	7.35065	0.005709
Abo_D3_NI_21	45436	0.733823	15601	89.2354	58240.3	8.03329	7.62133	0.011206
Abo_B6_ZA_7	32445	0.730344	11657	182.573	40066.9	8.12669	7.7969	0.005477
ALN_G10_ZA_21	14310	0.728791	5468	196.445	17892.3	7.76101	7.49515	0.00509
Blood_H5_IO_21	2788	0.727044	1099	50.7893	3107.19	6.30311	5.91187	0.019689
Abo_B10_AB_7	29952	0.722289	10742	109.265	41960.8	7.9339	7.57116	0.009152
Abo_C1_AB_21	34889	0.711743	12789	94.9156	49431.5	7.97761	7.54055	0.010536
MLN_C6_IO_21	3460	0.683526	1573	147.094	5015.33	6.96377	6.61775	0.006798
ALN_H3_NI_21	7455	0.660765	3463	283.924	11597	7.68197	7.35057	0.003522
Blood_G1_AB_21	2839	0.655513	1353	100.714	4007.18	6.83078	6.38096	0.009929
ALN_G8_IO_21	8887	0.651851	4251	338.218	13488.2	7.9304	7.58205	0.002957
Blood_H1_IO_21	2142	0.649393	1083	118.136	2597.11	6.79832	6.29174	0.008465
ALN_H5_IO_21	7493	0.648605	3612	314.035	11487.1	7.79435	7.43565	0.003184
ALN_F1_NI_7	1963	0.645441	963	369.759	3141.92	6.70777	6.36646	0.002704
ALN_E4_IO_7	5868	0.642808	2898	279.154	8996.78	7.65123	7.28076	0.003582
ALN_F10_AB_7	9823	0.641148	4652	181.857	16460.1	7.86776	7.46286	0.005499
Abo_C8_IO_21	10637	0.640876	5020	201.295	17076.7	7.91678	7.48527	0.004968
ALN_E5_IO_7	7580	0.629156	3750	273.756	13021	7.82313	7.43927	0.003653
ALN_F7_ZA_7	5271	0.629103	2665	280.883	9010.63	7.60132	7.22067	0.00356
Fec_C6_IO_21	2390	0.618828	1144	111.78	4748.39	6.60177	6.12821	0.008946
ALN_F3_IO_7	9897	0.613115	5055	304.268	18307.6	8.13709	7.73494	0.003287
ALN_F6_ZA_7	8380	0.59463	4459	391.49	15509	8.12554	7.6983	0.002554
MLN_D3_NI_21	3625	0.582621	2018	259.871	6302	7.51987	7.02456	0.003848
ALN_G4_ZA_21	3782	0.576943	2108	225.969	6990.44	7.53659	7.01862	0.004425
ALN_H1_IO_21	1875	0.573333	1053	397.573	3784.62	6.96537	6.51255	0.002515
ALN_G6_IO_21	3237	0.569663	1818	156.82	6033.34	7.39033	6.85205	0.006377
MLN_D6_IO_21	1688	0.561019	975	168.142	3100.35	6.91128	6.33901	0.005947
MLN_D4_ZA_21	1610	0.534161	970	142.711	3217	6.97564	6.33122	0.007007
MLN_B8_ZA_7	1813	0.521236	1094	95.0896	3820.65	7.0393	6.3511	0.010516
MLN_C10_ZA_21	1518	0.51581	940	161.51	3063.98	7.01495	6.34391	0.006192
ALN_H6_IO_21	3261	0.510886	2001	224.498	7676.07	7.65948	7.02332	0.004454
ALN_H8_NI_21	3116	0.50353	1925	209.062	7360.6	7.63411	6.99235	0.004783
Abo_D1_IO_21	3715	0.502557	2105	50.0737	13558.9	7.26764	6.50406	0.019971
MLN_C3_AB_21	1271	0.496459	808	159.314	2812.71	6.93087	6.23096	0.006277
MLN_D2_ZA_21	453	0.487859	294	117.541	963.9	6.0523	5.30782	0.008508
MLN_A5_IO_7	2426	0.464138	1599	408.488	6685.45	7.65572	6.96549	0.002448
MLN_B6_ZA_7	1303	0.460476	861	184.363	3211.03	7.07422	6.30334	0.005424
MLN_C2_AB_21	1298	0.456086	859	187.682	3451.34	7.06936	6.31337	0.005328
ALN_H2_ZA_21	1574	0.450445	1042	446.752	5387.12	7.25141	6.59071	0.002238
MLN_B7_ZA_7	1441	0.446912	969	209.22	4019.06	7.22713	6.45572	0.00478
ALN_F4_IO_7	2270	0.439648	1553	377.446	6308.04	7.7306	6.98141	0.002649
AF_F1_NI_7	7	0.428571	5	7	11	2.32429	1.47508	0.142857
ALN_F8_ZA_7	2965	0.426981	2015	494.5	9567.1	7.93047	7.17809	0.002022
ALN_H4_ZA_21	2099	0.426394	1439	268.518	6332.28	7.64203	6.84012	0.003724
ALN_F9_ZA_7	3086	0.425146	2039	238.652	13192.6	7.79014	7.03068	0.00419
AF_E3_NI_7	209	0.416268	154	205.057	489.5	5.78126	4.88495	0.004877
MLN_C5_ZA_21	46	0.413043	34	54.4737	104.2	4.30471	3.39535	0.018357
MLN_D5_IO_21	502	0.408367	359	155.632	1335.8	6.4862	5.57586	0.006425
Blood_E4_IO_7	150	0.373333	111	112.879	548.1	5.45752	4.51012	0.008859
MLN_C4_ZA_21	852	0.373239	622	251.405	3075.64	7.05068	6.12198	0.003978
MLN_C8_IO_21	189	0.365079	142	161.509	618	5.7457	4.77272	0.006192
MLN_C7_AB_21	650	0.329231	495	200.119	2990.53	6.97907	5.91195	0.004997
Abo_C7_AB_21	922	0.32538	678	82.3949	7575.54	7.0963	5.99876	0.012137
Abo_B9_ZA_7	973	0.318602	744	310.287	4884.62	7.37982	6.31137	0.003223
Abo_A6_ZA_7	1231	0.314379	930	229.067	8190.12	7.5217	6.46039	0.004366
RF_C10_ZA_21	10	0.3	8	15	29	3.15937	1.973	0.066667
MLN_C9_AB_21	441	0.29932	346	192.5	2328.75	6.75861	5.60098	0.005195
ALN_H7_NI_21	848	0.286557	680	508.68	4334.2	7.5052	6.32541	0.001966
ALN_F5_IO_7	660	0.278788	532	219.889	3161.07	7.29803	6.0273	0.004548
AF_E1_NI_7	8	0.25	7	28	14.5	3.32682	1.90616	0.035714
ALN_F2_NI_7	12	0.25	10	22	46	3.57271	2.21025	0.045455
MLN_C1_AB_21	33	0.212121	29	105.6	137.333	4.88315	3.31262	0.00947
AF_E2_NI_7	121	0.206612	105	191.053	675	6.1233	4.55087	0.005234
AF_E8_AB_7	10	0.2	9	45	23	3.80586	2.16396	0.022222
Blood_F2_NI_7	66	0.151515	60	238.333	445	5.92811	4.04262	0.004196
Blood_E8_AB_7	45	0.133333	42	330	227.25	5.77022	3.71424	0.00303
Blood_F9_ZA_7	32	0.125	30	248	156	5.49368	3.37909	0.004032
Blood_H9_NI_21	40	0.125	37	195	334.5	5.64389	3.57183	0.005128
Abo_A9_AB_7	293	0.119454	269	648.152	5005.14	7.59492	5.52053	0.001543
Blood_E2_NI_7	28	0.107143	26	126	326	5.41657	3.2145	0.007937
MLN_A4_IO_7	57	0.105263	54	532	372.75	6.25457	3.97009	0.00188
AF_H4_ZA_21	21	0.095238	20	210	105.5	5.35203	2.97851	0.004762
Blood_E6_ZA_7	74	0.094595	69	245.545	1174.5	6.49186	4.17659	0.004073
Abo_D4_ZA_21	149	0.09396	141	1002.36	1648.5	7.28663	4.92021	0.000998
Abo_C9_AB_21	77	0.090909	73	585.2	878	6.66325	4.26499	0.001709
Abo_D6_IO_21	310	0.090323	292	1019.04	4694.33	8.00797	5.62638	0.000981
Abo_C6_IO_21	43	0.069767	41	301	821	6.3186	3.68455	0.003322
Blood_E9_AB_7	30	0.066667	29	435	218	6.08024	3.35499	0.002299
Abo_A10_AB_7	107	0.046729	104	1417.75	2679.5	7.68211	4.62907	0.000705
